# Supplementary material for: New globally distributed bacteria with high proportions of novel protein families involved in sulfur and nitrogen cycling
Source: Research Square preprint supplement (doi:10.21203/rs.3.rs-1620321/v1), 2022-05-11
Supplement: Supplementary file 2 [file 1d8d08ffa827f32208d5a817.xlsx]

## Sheet: Table_List
List of Supplementary Tables	Captions
ST1	Metadata of samples that were used to recover genomes in this study.
ST2	Information of the genomes used and described in this study, including genomic statistics using checkM and taxonomy affiliations from GTDB-Tk as described in methods.
ST3	Average of Amino Acid Identity (AAI) of the genomes from this study and phylogenetically closely related and publicly available genomes.
ST4	Pairwise comparison of 16s rRNA sequences shown in Extended Data Figure 1.
ST5	Identity of 16S rRNA from genomes recovered in this study against Integrated Microbial Genomes and Microbiomes database.
ST6	Environments and geographic location of similar 16S rRNA sequences identified in the genomes described in this study shown in Figure 1.
ST7	Full list of annotated sequences in the 61 proteomes described in this study. Combined annotations from KofamScan and KAAS are shown. Sulfide-quinone reductase (SQR), dissimilatory sulfite reductase (DsrAB) and hydrogenases were manually confirmed by phylogenies shown in Extended Data Figures 4 and 5, respectively.
ST8	Gene counts of the annotated sequences in the 61 proteomes described in this study. Combined annotations from KofamScan and KAAS are shown. Sulfide-quinone reductase (SQR), dissimilatory sulfite reductase (DsrAB) and hydrogenases were manually confirmed by phylogenies shown in Extended Data Figure 4 and 5 respectively.
ST9	Manually curated substrate and enzyme-based classification of the Carbohydrate active enzymes (CAZymes) used in this study.
ST10	Carbohydrate activate enzymes (CAZymes) identified using dbcan2 in the 61 genomes described in this study.
ST11	Statistics of the identified CAZyme families found in each bacterial group (AABM5, GB-CP11, GB-CP12, GB-CP13, and GB-CP14).
ST12	Peptidases identified in the 61 genomes described in this study against the MEROPS database.
ST13	Statistics of the identified peptidase found in each bacterial group (AABM5, GB-CP11, GB-CP12, GB-CP13, and GB-CP14).
ST14	Details of the sequences used to build the dissimilatory sulfite reductase (Dsr) tree shown in Extended Data Figure 4.
ST15	Normalized relative abundance and rank of relative abundance of 53 genomes in this study among all genomes recovered from Guaymas Basin (2994 in total), Bohai Sea (5233 in total), and South China Sea (541 in total) samples shown in Extended Data Figure 6.

## Sheet: ST1
Habitat	Sampling Site	Water Depth (m)	Sample Depth (cm)	Sampling Date	Sample ID	Latitude/Longitude	Source	Recovered Bins for this study
Coastal Sea Sediment	Bohai Sea M3, China	26.5	0-2	Aug-2018	M3-2	38.668056N/119.5475E	This study	No
Coastal Sea Sediment	Bohai Sea M3, China	26.5	8-10	Aug-2018	M3-10	38.668056N/119.5475E	This study	Yes
Coastal Sea Sediment	Bohai Sea M3, China	26.5	20-22	Aug-2018	M3-22	38.668056N/119.5475E	This study	Yes
Coastal Sea Sediment	Bohai Sea M3, China	26.5	28-30	Aug-2018	M3-30	38.668056N/119.5475E	This study	Yes
Coastal Sea Sediment	Bohai Sea M3, China	26.5	36-38	Aug-2018	M3-38	38.668056N/119.5475E	This study	Yes
Coastal Sea Sediment	Bohai Sea M3, China	26.5	42-44	Aug-2018	M3-44	38.668056N/119.5475E	This study	Yes
Coastal Sea Sediment	Bohai Sea M8, China	30.5	0-2	Aug-2018	M8-2	40.188889N/121.199722E	This study	No
Coastal Sea Sediment	Bohai Sea M8, China	30.5	10-12	Aug-2018	M8-12	40.188889N/121.199722E	This study	No
Coastal Sea Sediment	Bohai Sea M8, China	30.5	30-32	Aug-2018	M8-32	40.188889N/121.199722E	This study	No
Coastal Sea Sediment	Bohai Sea M8, China	30.5	42-44	Aug-2018	M8-44	40.188889N/121.199722E	This study	No
Coastal Sea Sediment	Bohai Sea M8, China	30.5	56-58	Aug-2018	M8-58	40.188889N/121.199722E	This study	No
Coastal Sea Sediment	Bohai Sea M8, China	30.5	60-62	Aug-2018	M8-62	40.188889N/121.199722E	This study	Yes
Coastal Sea Sediment	Bohai Sea BHB10, China	17	0-2	Aug-2018	BHB10-2	38.751389N/118.156389E	This study	Yes
Coastal Sea Sediment	Bohai Sea BHB10, China	17	24-26	Aug-2018	BHB10-26	38.751389N/118.156389E	This study	Yes
Coastal Sea Sediment	Bohai Sea BHB10, China	17	36-38	Aug-2018	BHB10-38	38.751389N/118.156389E	This study	Yes
Hydrothermal Vent Sediment	Guaymas Basin Aceto Balsamico, Mexico	2000	0-3	Dec-2008	AB_03	27.010833N/111.415556W	This study	Yes
Hydrothermal Vent Sediment	Guaymas Basin Aceto Balsamico, Mexico	2000	6-9	Dec-2008	AB_69	27.010833N/111.415556W	This study	Yes
Hydrothermal Vent Sediment	Guaymas Basin Aceto Balsamico, Mexico	2000	12-15	Dec-2008	AB_1215	27.010833N/111.415556W	This study	No
Hydrothermal Vent Sediment	Guaymas Basin Aceto Balsamico, Mexico	2000	30-33	Dec-2008	AB_3033	27.010833N/111.415556W	This study	No
Hydrothermal Vent Sediment	Guaymas Basin Megamat19, Mexico	2000	0-2	Dec-2008	Meg19_02	27.010833N/111.415556W	This study	Yes
Hydrothermal Vent Sediment	Guaymas Basin Megamat19, Mexico	2000	4-6	Dec-2008	Meg19_46	27.010833N/111.415556W	This study	Yes
Hydrothermal Vent Sediment	Guaymas Basin Megamat19, Mexico	2000	10-12	Dec-2008	Meg19_1012	27.010833N/111.415556W	This study	Yes
Hydrothermal Vent Sediment	Guaymas Basin Megamat22, Mexico	2000	0-2	Dec-2008	Meg22_02	27.010833N/111.415556W	This study	Yes
Hydrothermal Vent Sediment	Guaymas Basin Megamat22, Mexico	2000	2-4	Dec-2008	Meg22_24	27.010833N/111.415556W	This study	Yes
Hydrothermal Vent Sediment	Guaymas Basin Megamat22, Mexico	2000	4-6	Dec-2008	Meg22_46	27.010833N/111.415556W	This study	Yes
Hydrothermal Vent Sediment	Guaymas Basin Megamat22, Mexico	2000	8-10	Dec-2008	Meg22_810	27.010833N/111.415556W	This study	Yes
Hydrothermal Vent Sediment	Guaymas Basin Megamat22, Mexico	2000	10-12	Dec-2008	Meg22_1012	27.010833N/111.415556W	This study	Yes
Hydrothermal Vent Sediment	Guaymas Basin Megamat22, Mexico	2000	12-14	Dec-2008	Meg22_1214	27.010833N/111.415556W	This study	Yes
Hydrothermal Vent Sediment	Guaymas Basin Megamat22, Mexico	2000	14-16	Dec-2008	Meg22_1416	27.010833N/111.415556W	This study	Yes
Hydrothermal Vent Sediment	Guaymas Basin Megamat22, Mexico	2000	16-18	Dec-2008	Meg22_1618	27.010833N/111.415556W	This study	No
Hydrothermal Vent Sediment	Guaymas Basin WB1, Mexico	2000	Microbial mat	Dec-2008	WB1	27.010833N/111.415556W	This study	No
Hydrothermal Vent Sediment	Guaymas Basin Mat Mound, Mexico	2000	0-4	Dec-2008	ex4484	27.010833N/111.415556W	This study	Yes
Cold Seep Sediment	Haima Cold Seep SY70-5, China	1389	0-2	May-2018	SY70-5-1	16.73N/110.47E	This study	No
Cold Seep Sediment	Haima Cold Seep SY70-5, China	1389	8-10	May-2018	SY70-5-5	16.73N/110.47E	This study	Yes
Cold Seep Sediment	Haima Cold Seep SY70-5, China	1389	14-16	May-2018	SY70-5-8	16.73N/110.47E	This study	Yes
Cold Seep Sediment	Haima Cold Seep SY70-5, China	1389	22-24	May-2018	SY70-5-12	16.73N/110.47E	This study	Yes
Cold Seep Sediment	Haima Cold Seep SY70-4, China	1394	4-6	May-2018	SY70-4-3	16.73N/110.47E	This study	Yes
Cold Seep Sediment	Haima Cold Seep SY70-4, China	1394	14-16	May-2018	SY70-4-8	16.73N/110.47E	This study	No
Cold Seep Sediment	Haima Cold Seep SY70-4, China	1394	20-22	May-2018	SY70-4-11	16.73N/110.47E	This study	Yes
Cold Seep Sediment	Haima Cold Seep SY72-5, China	1394	0-2	May-2018	SY72-5-1	16.73N/110.47E	This study	No
Cold Seep Sediment	Haima Cold Seep SY72-5, China	1394	12-14	May-2018	SY72-5-7	16.73N/110.47E	This study	No
Hydrothermal Vent Sediment	Longqi Vent, Southwest Indian Ocean	2782	Surface Microbial Mat	Dec-2018	LQ108M	37.78021S/49.64818E	This study	Yes
Wetland Sediment	Prairie Pothole Region P7 and P8, US	Unknown	1-21	Mar, Sep-2015	GCA_003820615#1	47.0963N/99.0994W	NCBI	Yes
Marine Sediment	North of the South China Sea B3, China	1100	0-43	Jul-2015	GCA_005223185#1	22.171667N/118.4E	NCBI	Yes
Subsurface Aquifer	Sanford Underground Research Facility, US	1500#2	NA	Oct-2013	GCA_003599535#1	44.352157N/103.750503W	NCBI	Yes
Marine Sediment	Aarhus Bay M5, Denmark	28	125	May-2013	GCA_002127415#1	56.1033N/10.4578E	NCBI	Yes
Hot Spring Sediment	Zodletone Spring, US	Unknown	Unknown	Dec-2013	3300016590.fna (Ga0186947)#3	34.9956N/98.6889W	IMG	Yes
Freshwater Sediment	Walker Lake, US	Unknown	Unknown	Unknown	2713897514.fna (Ga0170695)#3	38.6772N/118.7227W	IMG	Yes
#1 Assembly number in National Center for Biotechnology Information
#2 1500 meters below the ground surface
#3 Genome ID and GOLD analysis project ID in Integrated Microbial Genomes & Microbiomes

## Sheet: ST2
	Basic Information of MAGs																CheckM v1.0.5 Output													GDTB-Tk v1.1.1 Output
NCBI Biosample Accession	Bin ID	Taxonomy	Taxonomy in GTDB-Tk	16S	Completeness	Contamination	Genome Size (Mbp)	Predicted Genome Size (Mbp)	Number of Scaffolds	Longest Scaffold (bp)	N50 (bp)	GC Percentage (%)	Predicted Gene_counts	Total Length (bp)	Minimum Length (bp)	Average Length (bp)	Marker lineage	genomes	markers	marker sets	0	1	2	3	4	5+	Completeness	Contamination	Strain heterogeneity	classification	fastani_reference	fastani_reference_radius	fastani_taxonomy	fastani_ani	fastani_af	closest_placement_reference	closest_placement_taxonomy	closest_placement_ani	closest_placement_af	pplacer_taxonomy	classification_method	note	other_related_references(genome_id,species_name,radius,ANI,AF)	aa_percent	translation_table	red_value	warnings
NA	2713897514	Candidatus AABM5-125-24	d__Bacteria;p__AABM5-125-24	Y	75.82	0	1.85	2.44083	144	93289	21193	40.97	1502	1850634	2006	12851	k__Bacteria (UID2495)	2993	147	91	28	119	0	0	0	0	75.82	0	0	d__Bacteria;p__AABM5-125-24;c__AABM5-125-24;o__AABM5-125-24;f__;g__;s__	N/A	N/A	N/A	N/A	N/A	N/A	N/A	N/A	N/A	d__Bacteria;p__AABM5-125-24;c__AABM5-125-24;o__;f__;g__;s__	Placement	taxonomic novelty determined using RED	N/A	71.87	11	0.687927	N/A
NA	3300016590	Candidatus AABM5-125-24	d__Bacteria;p__AABM5-125-24	Y	65.87	0	2.39	3.62411	187	149932	26913	45.62	1954	2387202	2037	12765	k__Bacteria (UID2495)	2993	147	91	42	105	0	0	0	0	65.87	0	0	d__Bacteria;p__AABM5-125-24;c__AABM5-125-24;o__AABM5-125-24;f__AABM5-125-24;g__;s__	N/A	N/A	N/A	N/A	N/A	N/A	N/A	N/A	N/A	d__Bacteria;p__AABM5-125-24;c__AABM5-125-24;o__;f__;g__;s__	Placement	taxonomic novelty determined using RED	N/A	62.64	11	0.763073	N/A
SAMN26806726	AB_03_Bin_160	Candidatus GB-CP12	d__Bacteria;p__Eisenbacteria		78.05	1.1	3.2	4.09961	713	24263	4898	60.16	3086	3199745	2008	4487	k__Bacteria (UID2495)	2993	147	91	31	115	1	0	0	0	78.05	1.1	100	d__Bacteria;p__Eisenbacteria;c__RBG-16-71-46;o__;f__;g__;s__	N/A	N/A	N/A	N/A	N/A	N/A	N/A	N/A	N/A	d__Bacteria;p__;c__;o__;f__;g__;s__	Placement	taxonomic novelty determined using RED	N/A	70.08	11	0.427397	N/A
SAMN26806727	AB_69_Bin_103	Candidatus GB-CP14	d__Bacteria;p__Eisenbacteria		90.23	3.3	2.85	3.15927	365	56024	10757	66.57	2603	2850613	2004	7809	k__Bacteria (UID2495)	2993	147	91	32	112	3	0	0	0	90.23	3.3	0	d__Bacteria;p__Eisenbacteria;c__RBG-16-71-46;o__;f__;g__;s__	N/A	N/A	N/A	N/A	N/A	N/A	N/A	N/A	N/A	d__Bacteria;p__;c__;o__;f__;g__;s__	Placement	taxonomic novelty determined using RED	N/A	72.84	11	0.427463	N/A
SAMN26806728	AB_69_Bin_159	Candidatus GB-CP14	d__Bacteria;p__		79.67	1.1	2.8	3.51282	591	24158	5390	66.83	2646	2798662	2000	4735	k__Bacteria (UID2495)	2993	147	91	23	123	1	0	0	0	79.67	1.1	0	d__Bacteria;p__;c__;o__;f__;g__;s__	N/A	N/A	N/A	N/A	N/A	N/A	N/A	N/A	N/A	d__Bacteria;p__;c__;o__;f__;g__;s__	Placement	taxonomic classification fully defined by topology	N/A	73.41	11	0.352051	N/A
SAMN26980504	BHB10-2_Bin_362	Candidatus GB-CP12	d__Bacteria;p__ARS69		79.18	8.62	3.18	4.01546	170	189908	30152	66.75	2746	3179442	2040	18702	k__Bacteria (UID2495)	2993	147	91	25	105	17	0	0	0	79.18	8.62	0	d__Bacteria;p__ARS69;c__ARS69;o__ARS69;f__ARS69;g__;s__	N/A	N/A	N/A	N/A	N/A	N/A	N/A	N/A	N/A	d__Bacteria;p__;c__;o__;f__;g__;s__	Placement	taxonomic novelty determined using RED	N/A	65.79	11	0.713585	N/A
SAMN26980505	BHB10-26_Bin_369	Candidatus GB-CP14	d__Bacteria;p__Eisenbacteria		95.6	0	4.72	4.93435	844	37365	6730	68.08	4627	4717237	2000	5589	k__Bacteria (UID2495)	2993	147	91	4	143	0	0	0	0	95.6	0	0	d__Bacteria;p__Eisenbacteria;c__RBG-16-71-46;o__;f__;g__;s__	N/A	N/A	N/A	N/A	N/A	N/A	N/A	N/A	N/A	d__Bacteria;p__;c__;o__;f__;g__;s__	Placement	taxonomic novelty determined using RED	N/A	87.9	11	0.417788	N/A
SAMN26980506	BHB10-38_Bin_124	Candidatus GB-CP14	d__Bacteria;p__	Y	97.8	0	3.24	3.31708	40	478590	253653	66.69	2654	3244105	3260	81102	k__Bacteria (UID2495)	2993	147	91	2	145	0	0	0	0	97.8	0	0	d__Bacteria;p__;c__;o__;f__;g__;s__	N/A	N/A	N/A	N/A	N/A	N/A	N/A	N/A	N/A	d__Bacteria;p__;c__;o__;f__;g__;s__	Placement	taxonomic classification fully defined by topology	N/A	90.3	11	0.353821	N/A
SAMN26980507	BHB10-38_Bin_186	Candidatus GB-CP13	d__Bacteria;p__Eisenbacteria		55.84	5.6	3.05	5.45581	667	34854	5172	58.83	3252	3046525	2000	4567	k__Bacteria (UID2495)	2993	147	91	48	82	17	0	0	0	55.84	5.6	0	d__Bacteria;p__Eisenbacteria;c__RBG-16-71-46;o__;f__;g__;s__	N/A	N/A	N/A	N/A	N/A	N/A	N/A	N/A	N/A	d__Bacteria;p__;c__;o__;f__;g__;s__	Placement	taxonomic novelty determined using RED	N/A	48.41	11	0.413821	N/A
SAMN26980508	BHB10-38_Bin_9	Candidatus GB-CP13	d__Bacteria;p__Eisenbacteria		68.68	5.49	2.97	4.32614	348	43058	11585	56.2	2819	2971193	2002	8537	k__Bacteria (UID2495)	2993	147	91	49	92	6	0	0	0	68.68	5.49	16.67	d__Bacteria;p__Eisenbacteria;c__RBG-16-71-46;o__;f__;g__;s__	N/A	N/A	N/A	N/A	N/A	N/A	N/A	N/A	N/A	d__Bacteria;p__;c__;o__;f__;g__;s__	Placement	taxonomic novelty determined using RED	N/A	54.98	11	0.413483	N/A
SAMN27277834	ex4484_8	Candidatus GB-CP14	d__Bacteria;p__Eisenbacteria		60.47	4.4	1.9	3.14966	118	41280	16638	65.59	1725	1904602	9519	16140	k__Bacteria (UID2495)	2993	147	91	59	83	5	0	0	0	60.47	4.4	0	d__Bacteria;p__Eisenbacteria;c__RBG-16-71-46;o__;f__;g__;s__	N/A	N/A	N/A	N/A	N/A	N/A	N/A	N/A	N/A	d__Bacteria;p__;c__;o__;f__;g__;s__	Placement	taxonomic novelty determined using RED	N/A	51.07	11	0.415932	N/A
SAMN06319394	GCA_002127415	Candidatus AABM5-125-24	d__Bacteria;p__AABM5-125-24	Y	98.9	0	2.82	2.84781	360	31803	9986	55.79	2546	2816489	1010	7823	k__Bacteria (UID2495)	2993	147	91	1	146	0	0	0	0	98.9	0	0	d__Bacteria;p__AABM5-125-24;c__AABM5-125-24;o__AABM5-125-24;f__AABM5-125-24;g__AABM5-125-24;s__AABM5-125-24 sp002127415	GCA_002127415.1	95	d__Bacteria;p__AABM5-125-24;c__AABM5-125-24;o__AABM5-125-24;f__AABM5-125-24;g__AABM5-125-24;s__AABM5-125-24 sp002127415	100	0.97	GCA_002127415.1	d__Bacteria;p__AABM5-125-24;c__AABM5-125-24;o__AABM5-125-24;f__AABM5-125-24;g__AABM5-125-24;s__AABM5-125-24 sp002127415	100	0.97	d__Bacteria;p__AABM5-125-24;c__AABM5-125-24;o__;f__;g__;s__	ANI/Placement	topological placement and ANI have congruent species assignments	N/A	89.66	11	N/A	N/A
SAMN08499003	GCA_003599535	Candidatus AABM5-125-24	d__Bacteria;p__AABM5-125-24	Y	91.21	1.1	3.77	4.134	140	125527	31990	62.97	3113	3770623	10283	26933	k__Bacteria (UID2495)	2993	147	91	8	138	1	0	0	0	91.21	1.1	0	d__Bacteria;p__AABM5-125-24;c__;o__;f__;g__;s__	N/A	N/A	N/A	N/A	N/A	N/A	N/A	N/A	N/A	d__Bacteria;p__;c__;o__;f__;g__;s__	Placement	taxonomic novelty determined using RED	N/A	88.55	11	0.416598	N/A
SAMN10417337	GCA_003820615	Candidatus GB-CP12	d__Bacteria;p__Eisenbacteria	Y	90.11	1.26	2.96	3.28062	840	26147	4008	68.34	3072	2956164	1505	3519	k__Bacteria (UID2495)	2993	147	91	11	133	3	0	0	0	90.11	1.26	33.33	d__Bacteria;p__Eisenbacteria;c__RBG-16-71-46;o__;f__;g__;s__	N/A	N/A	N/A	N/A	N/A	N/A	N/A	N/A	N/A	d__Bacteria;p__;c__;o__;f__;g__;s__	Placement	taxonomic novelty determined using RED	N/A	82.1	11	0.430756	N/A
SAMN07236653	GCA_005223185	Candidatus AABM5-125-24	d__Bacteria;p__AABM5-125-24	Y	97.8	0.1	3.79	3.87959	18	635960	359442	46.54	2993	3794239	5380	210791	k__Bacteria (UID2495)	2993	147	91	2	144	1	0	0	0	97.8	0.1	0	d__Bacteria;p__AABM5-125-24;c__;o__;f__;g__;s__	N/A	N/A	N/A	N/A	N/A	N/A	N/A	N/A	N/A	d__Bacteria;p__;c__;o__;f__;g__;s__	Placement	taxonomic novelty determined using RED	N/A	94.17	11	0.412508	N/A
SAMN26980528	LQ108M_Bin_12	Candidatus GB-CP12	d__Bacteria;p__	Y	97.8	1.1	4.88	4.99001	49	996856	293092	57.33	4072	4880233	2045	99596	k__Bacteria (UID2495)	2993	147	91	3	143	1	0	0	0	97.8	1.1	0	d__Bacteria;p__;c__;o__;f__;g__;s__	N/A	N/A	N/A	N/A	N/A	N/A	N/A	N/A	N/A	d__Bacteria;p__;c__;o__;f__;g__;s__	Placement	taxonomic classification fully defined by topology	N/A	93.13	11	0.389546	N/A
SAMN26980509	M3-10_Bin_262	Candidatus GB-CP12	d__Bacteria;p__ARS69		76.86	2.3	3.56	4.62801	876	21409	4438	66.55	3619	3557090	2000	4060	k__Bacteria (UID2495)	2993	147	91	25	119	3	0	0	0	76.86	2.3	66.67	d__Bacteria;p__ARS69;c__ARS69;o__ARS69;f__ARS69;g__;s__	N/A	N/A	N/A	N/A	N/A	N/A	N/A	N/A	N/A	d__Bacteria;p__;c__;o__;f__;g__;s__	Placement	taxonomic novelty determined using RED	N/A	70.48	11	0.737804	N/A
SAMN26980510	M3-22_Bin_282	Candidatus GB-CP12	d__Bacteria;p__ARS69		96.7	5.38	4.72	4.8777	785	43287	7233	66.48	4441	4716736	2003	6008	k__Bacteria (UID2495)	2993	147	91	3	134	10	0	0	0	96.7	5.38	0	d__Bacteria;p__ARS69;c__ARS69;o__ARS69;f__ARS69;g__;s__	N/A	N/A	N/A	N/A	N/A	N/A	N/A	N/A	N/A	d__Bacteria;p__;c__;o__;f__;g__;s__	Placement	taxonomic novelty determined using RED	N/A	81.09	11	0.727822	Genome has more than 10.0% of markers with multiple hits
SAMN26980511	M3-30_Bin_374	Candidatus GB-CP13	d__Bacteria;p__Eisenbacteria		92.24	2.35	3.32	3.59597	198	109640	35217	55.8	2878	3316924	2036	16752	k__Bacteria (UID2495)	2993	147	91	8	130	9	0	0	0	92.24	2.35	88.89	d__Bacteria;p__Eisenbacteria;c__RBG-16-71-46;o__;f__;g__;s__	N/A	N/A	N/A	N/A	N/A	N/A	N/A	N/A	N/A	d__Bacteria;p__;c__;o__;f__;g__;s__	Placement	taxonomic novelty determined using RED	N/A	79.21	11	0.415801	N/A
SAMN26980512	M3-38_Bin_215	Candidatus GB-CP11	d__Bacteria;p__Gemmatimonadota		59.24	0.16	2.45	4.13205	665	14824	3859	63.09	2644	2447827	2001	3680	k__Bacteria (UID2495)	2993	147	91	47	98	2	0	0	0	59.24	0.16	50	d__Bacteria;p__Gemmatimonadota;c__;o__;f__;g__;s__	N/A	N/A	N/A	N/A	N/A	N/A	N/A	N/A	N/A	d__Bacteria;p__;c__;o__;f__;g__;s__	Placement	taxonomic novelty determined using RED	N/A	59.27	11	0.335727	N/A
SAMN26980513	M3-44_Bin_119	Candidatus GB-CP12	d__Bacteria;p__ARS69	Y	96.7	3.3	5.1	5.27285	284	124902	38571	67.59	4231	5098847	2007	17953	k__Bacteria (UID2495)	2993	147	91	3	141	3	0	0	0	96.7	3.3	0	d__Bacteria;p__ARS69;c__ARS69;o__ARS69;f__ARS69;g__;s__	N/A	N/A	N/A	N/A	N/A	N/A	N/A	N/A	N/A	d__Bacteria;p__;c__;o__;f__;g__;s__	Placement	taxonomic novelty determined using RED	N/A	86.45	11	0.7244	N/A
SAMN26980514	M3-44_Bin_198	Candidatus AABM5-125-24	d__Bacteria;p__AABM5-125-24		61.89	4.52	3.37	5.44269	795	19600	4567	48.95	3336	3368483	2000	4237	k__Bacteria (UID2495)	2993	147	91	43	98	6	0	0	0	61.89	4.52	16.67	d__Bacteria;p__AABM5-125-24;c__;o__;f__;g__;s__	N/A	N/A	N/A	N/A	N/A	N/A	N/A	N/A	N/A	d__Bacteria;p__;c__;o__;f__;g__;s__	Placement	taxonomic novelty determined using RED	N/A	60.62	11	0.411061	N/A
SAMN26980515	M8-62_Bin_157	Candidatus GB-CP11	d__Bacteria;p__Gemmatimonadota		75.66	6.59	3.47	4.58151	439	45099	11408	63.14	3185	3466371	2002	7896	k__Bacteria (UID2495)	2993	147	91	31	108	8	0	0	0	75.66	6.59	25	d__Bacteria;p__Gemmatimonadota;c__;o__;f__;g__;s__	N/A	N/A	N/A	N/A	N/A	N/A	N/A	N/A	N/A	d__Bacteria;p__;c__;o__;f__;g__;s__	Placement	taxonomic novelty determined using RED	N/A	68.65	11	0.328746	N/A
SAMN26980516	M8-62_Bin_262	Candidatus AABM5-125-24	d__Bacteria;p__AABM5-125-24		84.41	5.92	4.08	4.82968	707	40905	7732	54.06	3900	4076731	2000	5766	k__Bacteria (UID2495)	2993	147	91	25	110	12	0	0	0	84.41	5.92	66.67	d__Bacteria;p__AABM5-125-24;c__;o__;f__;g__;s__	N/A	N/A	N/A	N/A	N/A	N/A	N/A	N/A	N/A	d__Bacteria;p__;c__;o__;f__;g__;s__	Placement	taxonomic novelty determined using RED	N/A	73.29	11	0.40588	N/A
SAMN26980517	M8-62_Bin_326	Candidatus GB-CP11	d__Bacteria;p__Gemmatimonadota		74.6	5.23	2.36	3.16992	538	27180	4984	61.26	2504	2364761	2000	4395	k__Bacteria (UID2495)	2993	147	91	40	99	8	0	0	0	74.6	5.23	87.5	d__Bacteria;p__Gemmatimonadota;c__;o__;f__;g__;s__	N/A	N/A	N/A	N/A	N/A	N/A	N/A	N/A	N/A	d__Bacteria;p__;c__;o__;f__;g__;s__	Placement	taxonomic novelty determined using RED	N/A	62.74	11	0.330726	N/A
SAMN26806729	Meg19_02_Bin_5	Candidatus GB-CP14	d__Bacteria;p__Gemmatimonadota		50.87	8.89	2.08	4.08095	647	12243	3154	64.61	2223	2075981	2002	3208	k__Bacteria (UID2495)	2993	147	91	78	59	10	0	0	0	50.87	8.89	70	d__Bacteria;p__Gemmatimonadota;c__;o__;f__;g__;s__	N/A	N/A	N/A	N/A	N/A	N/A	N/A	N/A	N/A	d__Bacteria;p__;c__;o__;f__;g__;s__	Placement	taxonomic novelty determined using RED	N/A	34.62	11	0.324039	N/A
SAMN26806730	Meg19_1012_Bin_119	Candidatus GB-CP11	d__Bacteria;p__Gemmatimonadota		86.81	2.2	3.3	3.79633	324	51497	14898	58.2	3058	3295596	2542	10171	k__Bacteria (UID2495)	2993	147	91	17	128	2	0	0	0	86.81	2.2	0	d__Bacteria;p__Gemmatimonadota;c__;o__;f__;g__;s__	N/A	N/A	N/A	N/A	N/A	N/A	N/A	N/A	N/A	d__Bacteria;p__;c__;o__;f__;g__;s__	Placement	taxonomic novelty determined using RED	N/A	79.76	11	0.330393	N/A
SAMN26806731	Meg19_1012_Bin_198	Candidatus AABM5-125-24	d__Bacteria;p__AABM5-125-24	Y	95.54	1.83	2.83	2.95958	175	80581	20085	54.85	2321	2827581	2503	16157	k__Bacteria (UID2495)	2993	147	91	5	139	3	0	0	0	95.54	1.83	66.67	d__Bacteria;p__AABM5-125-24;c__AABM5-125-24;o__AABM5-125-24;f__AABM5-125-24;g__;s__	N/A	N/A	N/A	N/A	N/A	N/A	N/A	N/A	N/A	d__Bacteria;p__AABM5-125-24;c__AABM5-125-24;o__;f__;g__;s__	Placement	taxonomic novelty determined using RED	N/A	86.47	11	0.782169	N/A
SAMN26806732	Meg19_1012_Bin_219	Candidatus GB-CP14	d__Bacteria;p__		94.51	3.25	3.39	3.59167	369	52902	12312	66.87	2926	3394483	2576	9199	k__Bacteria (UID2495)	2993	147	91	5	131	11	0	0	0	94.51	3.25	45.45	d__Bacteria;p__;c__;o__;f__;g__;s__	N/A	N/A	N/A	N/A	N/A	N/A	N/A	N/A	N/A	d__Bacteria;p__;c__;o__;f__;g__;s__	Placement	taxonomic classification fully defined by topology	N/A	76.15	11	0.3601	N/A
SAMN26806733	Meg19_1012_Bin_459	Candidatus AABM5-125-24	d__Bacteria;p__AABM5-125-24	Y	94.51	1.1	3.37	3.56572	86	208667	61596	47.65	2825	3369965	2907	39185	k__Bacteria (UID2495)	2993	147	91	5	141	1	0	0	0	94.51	1.1	0	d__Bacteria;p__AABM5-125-24;c__;o__;f__;g__;s__	N/A	N/A	N/A	N/A	N/A	N/A	N/A	N/A	N/A	d__Bacteria;p__;c__;o__;f__;g__;s__	Placement	taxonomic novelty determined using RED	N/A	92.3	11	0.415782	N/A
SAMN26806734	Meg19_46_Bin_182	Candidatus GB-CP14	d__Bacteria;p__		95.6	3.3	4.11	4.3032	512	118968	12258	67.07	3468	4113858	2004	8034	k__Bacteria (UID2495)	2993	147	91	5	139	3	0	0	0	95.6	3.3	33.33	d__Bacteria;p__;c__;o__;f__;g__;s__	N/A	N/A	N/A	N/A	N/A	N/A	N/A	N/A	N/A	d__Bacteria;p__;c__;o__;f__;g__;s__	Placement	taxonomic classification fully defined by topology	N/A	83.35	11	0.35451	N/A
SAMN26807367	Meg19_46_Bin_201	Candidatus GB-CP14	d__Bacteria;p__Eisenbacteria		73.78	2.2	2.07	2.80303	469	22032	4824	66.82	2095	2068078	2007	4409	k__Bacteria (UID2495)	2993	147	91	32	113	2	0	0	0	73.78	2.2	50	d__Bacteria;p__Eisenbacteria;c__RBG-16-71-46;o__;f__;g__;s__	N/A	N/A	N/A	N/A	N/A	N/A	N/A	N/A	N/A	d__Bacteria;p__;c__;o__;f__;g__;s__	Placement	taxonomic novelty determined using RED	N/A	63.29	11	0.423099	N/A
SAMN26806735	Meg19_46_Bin_228	Candidatus GB-CP14	d__Bacteria;p__Eisenbacteria		65.82	5.59	2.42	3.67851	578	18024	4642	64.87	2339	2421197	2013	4188	k__Bacteria (UID2495)	2993	147	91	51	88	8	0	0	0	65.82	5.59	0	d__Bacteria;p__Eisenbacteria;c__RBG-16-71-46;o__;f__;g__;s__	N/A	N/A	N/A	N/A	N/A	N/A	N/A	N/A	N/A	d__Bacteria;p__;c__;o__;f__;g__;s__	Placement	taxonomic novelty determined using RED	N/A	49.35	11	0.420423	N/A
SAMN26806736	Meg19_46_Bin_239	Candidatus GB-CP11	d__Bacteria;p__UBP14		54.24	1.2	2.01	3.71272	437	16106	5246	60.76	1942	2013777	2001	4608	k__Bacteria (UID2495)	2993	147	91	73	72	2	0	0	0	54.24	1.2	50	d__Bacteria;p__UBP14;c__;o__;f__;g__;s__	N/A	N/A	N/A	N/A	N/A	N/A	N/A	N/A	N/A	d__Bacteria;p__;c__;o__;f__;g__;s__	Placement	taxonomic novelty determined using RED	N/A	43.75	11	0.352634	N/A
SAMN26806737	Meg19_46_Bin_247	Candidatus GB-CP14	d__Bacteria;p__Eisenbacteria		92.11	2.75	3.49	3.79156	203	153332	29402	66.93	2863	3492406	2072	17203	k__Bacteria (UID2495)	2993	147	91	9	135	3	0	0	0	92.11	2.75	33.33	d__Bacteria;p__Eisenbacteria;c__RBG-16-71-46;o__;f__;g__;s__	N/A	N/A	N/A	N/A	N/A	N/A	N/A	N/A	N/A	d__Bacteria;p__;c__;o__;f__;g__;s__	Placement	taxonomic novelty determined using RED	N/A	86.15	11	0.416265	N/A
SAMN26806738	Meg19_46_Bin_60	Candidatus GB-CP11	d__Bacteria;p__Gemmatimonadota		61.76	9.99	2.55	4.1254	651	15304	4222	62.19	2694	2547844	2000	3913	k__Bacteria (UID2495)	2993	147	91	49	87	11	0	0	0	61.76	9.99	100	d__Bacteria;p__Gemmatimonadota;c__;o__;f__;g__;s__	N/A	N/A	N/A	N/A	N/A	N/A	N/A	N/A	N/A	d__Bacteria;p__;c__;o__;f__;g__;s__	Placement	taxonomic novelty determined using RED	N/A	52.7	11	0.332057	N/A
SAMN26806739	Meg22_02_Bin_84	Candidatus GB-CP11	d__Bacteria;p__Gemmatimonadota		71.8	7.33	2.48	3.45931	695	18069	3678	61.39	2731	2483782	2001	3573	k__Bacteria (UID2495)	2993	147	91	43	96	8	0	0	0	71.8	7.33	62.5	d__Bacteria;p__Gemmatimonadota;c__;o__;f__;g__;s__	N/A	N/A	N/A	N/A	N/A	N/A	N/A	N/A	N/A	d__Bacteria;p__;c__;o__;f__;g__;s__	Placement	taxonomic novelty determined using RED	N/A	57.92	11	0.329802	N/A
SAMN26806740	Meg22_1012_Bin_348	Candidatus GB-CP13	d__Bacteria;p__Eisenbacteria		75.86	2.88	2.26	2.9788	476	17272	5370	64.59	2317	2259717	2001	4747	k__Bacteria (UID203)	5449	104	58	15	73	16	0	0	0	75.86	2.88	0	d__Bacteria;p__Eisenbacteria;c__RBG-16-71-46;o__;f__;g__;s__	N/A	N/A	N/A	N/A	N/A	N/A	N/A	N/A	N/A	d__Bacteria;p__;c__;o__;f__;g__;s__	Placement	taxonomic novelty determined using RED	N/A	60.32	11	0.414148	N/A
SAMN26806741	Meg22_1214_Bin_137	Candidatus GB-CP13	d__Bacteria;p__Eisenbacteria		87.36	3.3	2.57	2.94033	411	86287	7997	50.94	2670	2568672	2013	6249	k__Bacteria (UID2495)	2993	147	91	14	130	3	0	0	0	87.36	3.3	0	d__Bacteria;p__Eisenbacteria;c__;o__;f__;g__;s__	N/A	N/A	N/A	N/A	N/A	N/A	N/A	N/A	N/A	d__Bacteria;p__;c__;o__;f__;g__;s__	Placement	taxonomic novelty determined using RED	N/A	80.28	11	0.410998	N/A
SAMN26806742	Meg22_1214_Bin_176	Candidatus GB-CP13	d__Bacteria;p__		93.1	8.62	2.55	2.73516	304	63034	11465	64.61	2389	2546430	2007	8376	k__Bacteria (UID203)	5449	104	58	4	81	19	0	0	0	93.1	8.62	5.26	d__Bacteria;p__;c__;o__;f__;g__;s__	N/A	N/A	N/A	N/A	N/A	N/A	N/A	N/A	N/A	d__Bacteria;p__;c__;o__;f__;g__;s__	Placement	taxonomic classification fully defined by topology	N/A	78.04	11	0.35873	N/A
SAMN26806743	Meg22_1416_Bin_86	Candidatus AABM5-125-24	d__Bacteria;p__AABM5-125-24		66.83	5.59	2.46	3.68439	592	50208	4444	52.69	2893	2462278	2005	4159	k__Bacteria (UID2495)	2993	147	91	35	104	8	0	0	0	66.83	5.59	0	d__Bacteria;p__AABM5-125-24;c__;o__;f__;g__;s__	N/A	N/A	N/A	N/A	N/A	N/A	N/A	N/A	N/A	d__Bacteria;p__;c__;o__;f__;g__;s__	Placement	taxonomic novelty determined using RED	N/A	54.21	11	0.408661	Genome has more than 10.8% of markers with multiple hits
SAMN26806744	Meg22_24_Bin_124	Candidatus GB-CP11	d__Bacteria;p__Gemmatimonadota		71.78	6.78	2.93	4.08297	548	28853	6549	61.42	3061	2930757	2000	5348	k__Bacteria (UID2495)	2993	147	91	33	107	7	0	0	0	71.78	6.78	85.71	d__Bacteria;p__Gemmatimonadota;c__;o__;f__;g__;s__	N/A	N/A	N/A	N/A	N/A	N/A	N/A	N/A	N/A	d__Bacteria;p__;c__;o__;f__;g__;s__	Placement	taxonomic novelty determined using RED	N/A	65.71	11	0.329627	N/A
SAMN26806745	Meg22_24_Bin_129	Candidatus GB-CP13	d__Bacteria;p__Eisenbacteria	Y	95.6	5.06	3.55	3.70883	558	33774	9021	57.32	3393	3545638	2000	6354	k__Bacteria (UID2495)	2993	147	91	5	130	12	0	0	0	95.6	5.06	0	d__Bacteria;p__Eisenbacteria;c__RBG-16-71-46;o__;f__;g__;s__	N/A	N/A	N/A	N/A	N/A	N/A	N/A	N/A	N/A	d__Bacteria;p__;c__;o__;f__;g__;s__	Placement	taxonomic novelty determined using RED	N/A	83.43	11	0.412389	N/A
SAMN26806746	Meg22_24_Bin_156	Candidatus GB-CP14	d__Bacteria;p__Eisenbacteria		90.11	5.59	2.96	3.28126	307	62606	13692	66.93	2496	2956741	2010	9631	k__Bacteria (UID2495)	2993	147	91	11	129	7	0	0	0	90.11	5.59	14.29	d__Bacteria;p__Eisenbacteria;c__RBG-16-71-46;o__;f__;g__;s__	N/A	N/A	N/A	N/A	N/A	N/A	N/A	N/A	N/A	d__Bacteria;p__;c__;o__;f__;g__;s__	Placement	taxonomic novelty determined using RED	N/A	78.75	11	0.415059	N/A
SAMN26806747	Meg22_46_Bin_11	Candidatus GB-CP11	d__Bacteria;p__Latescibacterota		68.38	2.66	1.92	2.81386	501	1924117	3982	58.44	2090	1924117	2001	3840	k__Bacteria (UID2495)	2993	147	91	35	104	8	0	0	0	68.38	2.66	37.5	d__Bacteria;p__Latescibacterota;c__;o__;f__;g__;s__	N/A	N/A	N/A	N/A	N/A	N/A	N/A	N/A	N/A	d__Bacteria;p__Latescibacterota;c__;o__;f__;g__;s__	Placement	taxonomic novelty determined using RED	N/A	65.71	11	0.404661	N/A
SAMN26806748	Meg22_46_Bin_130	Candidatus GB-CP14	d__Bacteria;p__		96.7	2.2	3.23	3.34238	128	167920	43610	66.84	2624	3232083	2016	25250	k__Bacteria (UID2495)	2993	147	91	3	142	2	0	0	0	96.7	2.2	0	d__Bacteria;p__;c__;o__;f__;g__;s__	N/A	N/A	N/A	N/A	N/A	N/A	N/A	N/A	N/A	d__Bacteria;p__;c__;o__;f__;g__;s__	Placement	taxonomic classification fully defined by topology	N/A	88.63	11	0.354987	N/A
SAMN26806749	Meg22_46_Bin_210	Candidatus GB-CP13	d__Bacteria;p__Eisenbacteria		65.93	3.3	2.62	3.97498	692	14616	3931	61.22	2614	2620707	2000	3787	k__Bacteria (UID2495)	2993	147	91	42	102	3	0	0	0	65.93	3.3	33.33	d__Bacteria;p__Eisenbacteria;c__RBG-16-71-46;o__;f__;g__;s__	N/A	N/A	N/A	N/A	N/A	N/A	N/A	N/A	N/A	d__Bacteria;p__;c__;o__;f__;g__;s__	Placement	taxonomic novelty determined using RED	N/A	64.07	11	0.426723	N/A
SAMN26806750	Meg22_46_Bin_213	Candidatus GB-CP11	d__Bacteria;p__Gemmatimonadota	Y	89.01	6.59	3.09	3.46989	527	40220	7584	61.38	3207	3088548	2000	5860	k__Bacteria (UID2495)	2993	147	91	11	128	8	0	0	0	89.01	6.59	37.5	d__Bacteria;p__Gemmatimonadota;c__;o__;f__;g__;s__	N/A	N/A	N/A	N/A	N/A	N/A	N/A	N/A	N/A	d__Bacteria;p__;c__;o__;f__;g__;s__	Placement	taxonomic novelty determined using RED	N/A	80.79	11	0.329833	N/A
SAMN26806751	Meg22_46_Bin_23	Candidatus AABM5-125-24	d__Bacteria;p__AABM5-125-24		58.26	2.2	1.97	3.38794	507	17272	4245	47.76	2093	1973815	2004	3893	k__Bacteria (UID2495)	2993	147	91	47	98	2	0	0	0	58.26	2.2	0	d__Bacteria;p__AABM5-125-24;c__;o__;f__;g__;s__	N/A	N/A	N/A	N/A	N/A	N/A	N/A	N/A	N/A	d__Bacteria;p__;c__;o__;f__;g__;s__	Placement	taxonomic novelty determined using RED	N/A	57.24	11	0.418416	N/A
SAMN26806752	Meg22_46_Bin_45	Candidatus GB-CP14	d__Bacteria;p__	Y	73.5	2.3	3.29	4.47416	693	35049	5517	67.18	3026	3288506	2000	4745	k__Bacteria (UID2495)	2993	147	91	31	113	3	0	0	0	73.5	2.3	33.33	d__Bacteria;p__;c__;o__;f__;g__;s__	N/A	N/A	N/A	N/A	N/A	N/A	N/A	N/A	N/A	d__Bacteria;p__;c__;o__;f__;g__;s__	Placement	taxonomic classification fully defined by topology	N/A	67.78	11	0.371515	N/A
SAMN26806753	Meg22_46_Bin_89	Candidatus GB-CP13	d__Bacteria;p__ARS69		97.8	7.36	2.96	3.02946	353	53337	12796	57.5	2744	2962810	2004	8393	k__Bacteria (UID2495)	2993	147	91	2	129	5	7	4	0	97.8	7.36	34	d__Bacteria;p__ARS69;c__ARS69;o__;f__;g__;s__	N/A	N/A	N/A	N/A	N/A	N/A	N/A	N/A	N/A	d__Bacteria;p__;c__;o__;f__;g__;s__	Placement	taxonomic novelty determined using RED	N/A	85.46	11	0.479681	N/A
SAMN26806754	Meg22_810_Bin_217	Candidatus AABM5-125-24	d__Bacteria;p__AABM5-125-24		76.97	8.32	3.13	4.0644	677	24205	5489	48.2	2995	3128368	2002	4620	k__Bacteria (UID2495)	2993	147	91	33	99	14	1	0	0	76.97	8.32	0	d__Bacteria;p__AABM5-125-24;c__AABM5-125-24;o__AABM5-125-24;f__AABM5-125-24;g__;s__	N/A	N/A	N/A	N/A	N/A	N/A	N/A	N/A	N/A	d__Bacteria;p__AABM5-125-24;c__AABM5-125-24;o__;f__;g__;s__	Placement	taxonomic novelty determined using RED	N/A	60.44	11	0.768226	N/A
SAMN26980518	SY70-4-11_Bin_40	Candidatus GB-CP11	d__Bacteria;p__		70.64	0	2.06	2.91111	472	21189	4955	57.65	2158	2056405	2006	4356	k__Bacteria (UID2495)	2993	147	91	44	103	0	0	0	0	70.64	0	0	d__Bacteria;p__;c__;o__;f__;g__;s__	N/A	N/A	N/A	N/A	N/A	N/A	N/A	N/A	N/A	d__Bacteria;p__;c__;o__;f__;g__;s__	Placement	taxonomic classification fully defined by topology	N/A	63.43	11	0.374109	N/A
SAMN26980519	SY70-4-3_Bin_44	Candidatus GB-CP13	d__Bacteria;p__Eisenbacteria		69.78	3.91	1.49	2.12878	436	11114	3432	58.56	1585	1485466	2002	3407	k__Bacteria (UID2495)	2993	147	91	37	105	5	0	0	0	69.78	3.91	40	d__Bacteria;p__Eisenbacteria;c__;o__;f__;g__;s__	N/A	N/A	N/A	N/A	N/A	N/A	N/A	N/A	N/A	d__Bacteria;p__;c__;o__;f__;g__;s__	Placement	taxonomic novelty determined using RED	N/A	58.51	11	0.408553	N/A
SAMN26980520	SY70-4-3_Bin_59	Candidatus GB-CP13	d__Bacteria;p__Eisenbacteria		65.89	2.6	2.04	3.09317	503	25609	4282	60.5	2116	2038093	2003	4051	k__Bacteria (UID2495)	2993	147	91	43	97	7	0	0	0	65.89	2.6	28.57	d__Bacteria;p__Eisenbacteria;c__;o__;f__;g__;s__	N/A	N/A	N/A	N/A	N/A	N/A	N/A	N/A	N/A	d__Bacteria;p__;c__;o__;f__;g__;s__	Placement	taxonomic novelty determined using RED	N/A	61.05	11	0.410949	N/A
SAMN26980521	SY70-4-3_Bin_68	Candidatus GB-CP14	d__Bacteria;p__Eisenbacteria		63.73	1.81	1.56	2.45486	441	12803	3739	63.38	1671	1564482	2000	3547	k__Bacteria (UID2495)	2993	147	91	43	100	4	0	0	0	63.73	1.81	50	d__Bacteria;p__Eisenbacteria;c__RBG-16-71-46;o__;f__;g__;s__	N/A	N/A	N/A	N/A	N/A	N/A	N/A	N/A	N/A	d__Bacteria;p__;c__;o__;f__;g__;s__	Placement	taxonomic novelty determined using RED	N/A	57.56	11	0.422273	N/A
SAMN26980522	SY70-5-12_Bin_1	Candidatus GB-CP14	d__Bacteria;p__		98.9	4.95	2.91	2.94315	231	281204	69897	59.28	2558	2910771	2002	12600	k__Bacteria (UID2495)	2993	147	91	1	141	5	0	0	0	98.9	4.95	20	d__Bacteria;p__;c__;o__;f__;g__;s__	N/A	N/A	N/A	N/A	N/A	N/A	N/A	N/A	N/A	d__Bacteria;p__;c__;o__;f__;g__;s__	Placement	taxonomic classification fully defined by topology	N/A	85.75	11	0.363292	N/A
SAMN26980523	SY70-5-5_Bin_6	Candidatus GB-CP14	d__Bacteria;p__Eisenbacteria		94.89	3.95	1.34	1.41651	220	21904	8151	63.81	1357	1344126	2000	6109	k__Bacteria (UID2495)	2993	147	91	7	135	4	1	0	0	94.89	3.95	57.14	d__Bacteria;p__Eisenbacteria;c__RBG-16-71-46;o__;f__;g__;s__	N/A	N/A	N/A	N/A	N/A	N/A	N/A	N/A	N/A	d__Bacteria;p__;c__;o__;f__;g__;s__	Placement	taxonomic novelty determined using RED	N/A	81.29	11	0.419756	N/A
SAMN26980524	SY70-5-5_Bin_61	Candidatus GB-CP14	d__Bacteria;p__		69.47	1.27	3.04	4.36945	413	93684	11240	64.01	2924	3035456	2004	7349	k__Bacteria (UID2495)	2993	147	91	32	105	10	0	0	0	69.47	1.27	80	d__Bacteria;p__;c__;o__;f__;g__;s__	N/A	N/A	N/A	N/A	N/A	N/A	N/A	N/A	N/A	d__Bacteria;p__;c__;o__;f__;g__;s__	Placement	taxonomic classification fully defined by topology	N/A	62.98	11	0.35578	N/A
SAMN26980525	SY70-5-8_Bin_20	Candidatus GB-CP14	d__Bacteria;p__	Y	92.01	3.76	2.41	2.61651	400	48056	7423	64.2	2464	2407448	2001	6018	k__Bacteria (UID2495)	2993	147	91	12	130	5	0	0	0	92.01	3.76	80	d__Bacteria;p__;c__;o__;f__;g__;s__	N/A	N/A	N/A	N/A	N/A	N/A	N/A	N/A	N/A	d__Bacteria;p__;c__;o__;f__;g__;s__	Placement	taxonomic classification fully defined by topology	N/A	78.71	11	0.355182	N/A
SAMN26980526	SY70-5-8_Bin_74	Candidatus GB-CP14	d__Bacteria;p__		63.55	1.1	2.24	3.52016	526	20795	4505	60.85	2307	2237059	2002	4252	k__Bacteria (UID2495)	2993	147	91	41	105	1	0	0	0	63.55	1.1	100	d__Bacteria;p__;c__;o__;f__;g__;s__	N/A	N/A	N/A	N/A	N/A	N/A	N/A	N/A	N/A	d__Bacteria;p__;c__;o__;f__;g__;s__	Placement	taxonomic classification fully defined by topology	N/A	58.1	11	0.354728	N/A

## Sheet: ST3
	AB_03_Bin_160_GB-CP12	AB_69_Bin_103_GB-CP14	AB_69_Bin_159_GB-CP14	B2713897514_AABM5-125-24	B3300016590_AABM5-125-24	B3300016610_KSB1	BHB10_26_Bin_369_GB-CP14	BHB10_2_Bin_362_GB-CP12	BHB10_38_Bin_124_GB-CP14	BHB10_38_Bin_186_GB-CP13	BHB10_38_Bin_9_GB-CP13	GCA_000010305_Gemmatimonadetes	GCA_000522985_Gemmatimonadetes	GCA_000695095_Gemmatimonadetes	GCA_001771055_Calditrichaeota	GCA_001771235_KSB1	GCA_001777975_Eisenbacteria	GCA_001780165_Eisenbacteria	GCA_001886815_Calditrichaeota	GCA_002011685_KSB1	GCA_002049825_Calditrichaeota	GCA_002085035_KSB1	GCA_002085285_Latescibacteria	GCA_002085355_KSB1	GCA_002127415_AABM5-125-24	GCA_002127425_KSB1	GCA_002313925_Gemmatimonadetes	GCA_002348465_Gemmatimonadetes	GCA_002348755_Gemmatimonadetes	GCA_002404375_Gemmatimonadetes	GCA_002483225_Gemmatimonadetes	GCA_002500425_Gemmatimonadetes	GCA_003235575_Eisenbacteria	GCA_003369455_Latescibacteria	GCA_003576975_KSB1	GCA_003599105_Latescibacteria	GCA_003599535_AABM5-125-24	GCA_003644765_KSB1	GCA_003644775_KSB1	GCA_003644785_KSB1	GCA_003645915_KSB1	GCA_003645965_KSB1	GCA_003650235_Calditrichaeota	GCA_003695965_Calditrichaeota	GCA_003696445_Calditrichaeota	GCA_003820615_GB-CP12	GCA_003854975_KSB1	GCA_003854985_Calditrichaeota	GCA_003854995_KSB1
AB_03_Bin_160_GB-CP12	0	46.76	47.45	44.18	45.11	45.34	48.08	48.48	47.75	47.68	46.41	45.36	45.52	45.61	45.38	45.76	48.13	46.94	45.73	46.96	46.46	47.3	46.82	45.83	45.6	46.1	45.66	45.55	44.99	44.29	45.63	44.85	47.38	45.56	46.02	46.25	46.41	46.44	46.42	46.41	45.69	46.43	45.33	46.91	46.46	57.72	45.34	45.08	44.94
AB_69_Bin_103_GB-CP14	46.76	0	73.24	45.04	45.59	46.96	86.88	47.33	86.88	49.06	50.32	45.44	45.42	45.36	46.42	46.33	48.33	47.4	45.75	47.14	46.42	47.36	48.05	47.52	46.37	47.83	44.46	44.44	43.51	44.24	45.94	43.36	47.84	47.17	46.59	48.53	46.77	47.23	47.59	47.29	46.82	47.64	45.4	46.8	46.97	48.95	46.67	45.31	46.22
AB_69_Bin_159_GB-CP14	47.45	73.24	0	45.61	47.24	48.12	73	47.57	73.16	50.34	50.49	46.24	46.33	46.32	47.85	47.58	48.91	48.33	46.8	48.31	48.6	49.05	49.08	49.32	48	49.16	46.32	45.22	44.81	45.89	46.31	44.61	48.68	48.2	47.5	48.5	47.52	49.13	48.63	48.6	48.4	49.16	46	48.18	47.45	50.16	47.65	46.04	47.13
B2713897514_AABM5-125-24	44.18	45.04	45.61	0	54.74	46.7	45.47	45.13	45.4	46.46	44.94	43.81	44.09	44.17	46.72	46.33	45.96	45.12	47.39	47.03	47.37	47.94	46.79	47.08	55.62	47.82	43.4	43.8	42.76	42.86	43.99	43.15	44.87	45.35	46.16	46.29	49.09	47.63	47.51	47.33	47.06	47.71	46.8	47.27	46.96	45.53	46.31	46.26	45.34
B3300016590_AABM5-125-24	45.11	45.59	47.24	54.74	0	47.03	45.95	46.15	46.11	47.04	46.35	44.11	43.93	43.89	47.02	46.73	46.92	46.01	46.68	47.95	46.89	47.58	47.49	47.8	60.01	48.04	44.28	44.05	43.56	43.58	44.17	43.96	45.76	46.38	45.99	45.68	49.73	48.24	48.05	48.2	46.59	47.63	46.32	47.39	47.15	46.98	46.85	46.37	46.04
B3300016610_KSB1	45.34	46.96	48.12	46.7	47.03	0	47.6	46.08	47.69	47.26	47.17	45.32	45.93	45.1	48.9	51.71	47.21	46.13	48.33	50.2	49.74	50.96	47.65	50.13	47.08	51.04	45.48	44.56	44.12	45.32	45.54	44.36	46.79	46.61	49.1	47.53	47.91	51.35	50.94	51.06	53.88	51.2	47.82	49.2	48.74	47.23	51.32	49.55	50.78
BHB10_26_Bin_369_GB-CP14	48.08	86.88	73	45.47	45.95	47.6	0	47.88	99.87	49.55	50.04	46.03	45.97	45.69	47.12	47.24	49.07	48.18	46.43	47.58	47.87	48.11	48.67	48.37	46.8	48.73	45.42	45.03	44.02	44.63	45.82	43.95	48.53	47.28	46.59	49.2	47.3	48.16	47.99	47.57	47.53	48.27	46.23	47.39	47.18	49.31	46.74	45.77	46.59
BHB10_2_Bin_362_GB-CP12	48.48	47.33	47.57	45.13	46.15	46.08	47.88	0	47.87	46.95	46.21	46.38	46.99	46.74	45.38	46.06	48.91	48.28	45.91	47.13	45.4	46.85	47	46.5	45.9	46.75	47.1	47.02	45.39	45.56	46.75	45.76	49.02	46.26	46.4	47.86	46.37	46.65	46.21	46.5	46.12	46.32	45.43	46.69	46.4	49.14	45.58	45.38	45.1
BHB10_38_Bin_124_GB-CP14	47.75	86.88	73.16	45.4	46.11	47.69	99.87	47.87	0	49.52	50.09	45.75	45.77	45.54	46.88	47.2	49.06	48.26	46.32	47.77	47.73	47.95	48.64	48.31	46.81	48.82	45.22	44.66	43.77	44.66	45.69	43.64	48.58	47.42	46.37	48.97	47.3	48.11	48.01	47.58	47.7	48.38	46.27	47.45	47.26	49.29	46.9	45.9	46.65
BHB10_38_Bin_186_GB-CP13	47.68	49.06	50.34	46.46	47.04	47.26	49.55	46.95	49.52	0	61.44	44.9	45.37	44.57	46.57	46.76	48.57	47.01	46.54	47.77	47.25	47.09	48.53	48.65	47.4	48.76	45.23	45.31	44.24	44.82	44.77	44.59	48.4	47.66	46.31	48.3	47.11	47.75	47.63	47.84	47.35	47.72	46.21	47.53	47.11	49.49	46.72	45.6	46.64
BHB10_38_Bin_9_GB-CP13	46.41	50.32	50.49	44.94	46.35	47.17	50.04	46.21	50.09	61.44	0	44.28	44.24	44.12	46.53	45.82	47.4	46.98	46	46.68	46.18	47.97	48.87	48.35	46.87	48.24	44.07	44.58	43.28	43.84	44.67	43.58	47.58	47.46	45.63	48.77	46.56	47.75	47.98	47.49	46.74	48.24	45.43	46.15	46.29	48.33	46.55	45.4	46.27
GCA_000010305_Gemmatimonadetes	45.36	45.44	46.24	43.81	44.11	45.32	46.03	46.38	45.75	44.9	44.28	0	59.65	73.9	44.65	44.27	47.93	46.73	44.79	46.08	45.79	46.05	45.79	44.76	44.81	45.19	49.59	49.2	48.03	57.78	72.79	48.31	46.83	44.37	46.23	46.61	45.82	45.6	45.71	45.75	44.25	45.81	45.27	45.75	46.2	47.08	44.44	44.01	44.01
GCA_000522985_Gemmatimonadetes	45.52	45.42	46.33	44.09	43.93	45.93	45.97	46.99	45.77	45.37	44.24	59.65	0	59.52	44.64	44.86	47.86	47.49	44.75	46.19	45.42	46.1	45.61	45.02	45.38	44.78	50	49.6	47.76	59.6	59.67	48.01	47.17	44.5	46.58	46.85	46.1	45.13	45.61	45.83	44.41	46.05	44.97	45.96	46.54	47.36	44.97	44.12	44.34
GCA_000695095_Gemmatimonadetes	45.61	45.36	46.32	44.17	43.89	45.1	45.69	46.74	45.54	44.57	44.12	73.9	59.52	0	44.3	44.01	47.79	46.47	44.72	45.85	45.56	46.12	45.52	45.03	44.93	44.99	49.48	49.36	47.88	57.2	73.8	48.15	46.99	44.39	45.78	46.4	45.89	45.48	45.52	45.58	44.23	45.89	44.82	45.81	46.22	46.82	44.79	43.87	43.61
GCA_001771055_Calditrichaeota	45.38	46.42	47.85	46.72	47.02	48.9	47.12	45.38	46.88	46.57	46.53	44.65	44.64	44.3	0	48.89	46.8	46.15	51.06	49.49	62.18	49.28	47.87	48.92	46.82	49.76	44.17	44.7	44.43	45.27	44.5	44.43	45.76	46.3	48.82	47.55	47.76	49.26	49.17	49.33	48.08	49.52	50.25	55.23	55.59	47.06	48.29	50.78	48.54
GCA_001771235_KSB1	45.76	46.33	47.58	46.33	46.73	51.71	47.24	46.06	47.2	46.76	45.82	44.27	44.86	44.01	48.89	0	46.68	46.11	48.97	50.95	50.08	51.82	47.21	52.14	46.82	52.21	45.13	44.67	44	44.37	44.53	44.76	46.02	46.29	50.73	46.09	47.54	51.59	51.65	51.61	50.3	51.83	49.73	49.3	48.63	46.84	56.73	48.66	56.44
GCA_001777975_Eisenbacteria	48.13	48.33	48.91	45.96	46.92	47.21	49.07	48.91	49.06	48.57	47.4	47.93	47.86	47.79	46.8	46.68	0	98.93	46.8	48.46	47.94	48.34	48.77	47.01	47.52	47.2	47.22	46.51	45.74	47.22	48.07	45.77	54.47	47.53	47.77	49.04	48.15	47.47	47.86	48.17	47.04	47.61	46.94	47.94	47.81	49.78	46.3	46.03	46.02
GCA_001780165_Eisenbacteria	46.94	47.4	48.33	45.12	46.01	46.13	48.18	48.28	48.26	47.01	46.98	46.73	47.49	46.47	46.15	46.11	98.93	0	45.49	47.37	47.32	47.17	47.82	46.33	46.69	46.31	46.14	45.74	44.41	46.15	46.91	44.7	52.97	45.72	47.04	48.08	47.36	47.03	47.08	47.42	45.95	46.99	46.23	46.99	47.04	49.01	45.43	44.48	45.07
GCA_001886815_Calditrichaeota	45.73	45.75	46.8	47.39	46.68	48.33	46.43	45.91	46.32	46.54	46	44.79	44.75	44.72	51.06	48.97	46.8	45.49	0	50.71	52.7	49.59	48.03	49.72	46.83	49.84	44.89	44.93	44.59	44.13	44.81	44.57	46.05	46.39	48.5	46.79	47.77	48.97	49.32	49.41	48.87	49.7	67.21	51.53	51.66	47.06	48.79	58.17	48.02
GCA_002011685_KSB1	46.96	47.14	48.31	47.03	47.95	50.2	47.58	47.13	47.77	47.77	46.68	46.08	46.19	45.85	49.49	50.95	48.46	47.37	50.71	0	50.85	56.9	48.34	51.85	48.09	51.53	45.97	45.64	45.62	46.46	46.09	45.55	47.17	47.01	50.34	48.8	48.79	56.74	56.86	57.19	50.02	56.89	50.49	50.97	51.01	47.79	49.86	48.87	49.6
GCA_002049825_Calditrichaeota	46.46	46.42	48.6	47.37	46.89	49.74	47.87	45.4	47.73	47.25	46.18	45.79	45.42	45.56	62.18	50.08	47.94	47.32	52.7	50.85	0	50.73	49.36	50.76	47.8	50.78	46.17	45.23	44.78	44.88	45.51	45.1	46.59	46.2	48.51	48.53	48.28	50.5	50.42	50.87	49.9	50.61	52.69	57.55	58.15	47.62	49.83	51.45	49.65
GCA_002085035_KSB1	47.3	47.36	49.05	47.94	47.58	50.96	48.11	46.85	47.95	47.09	47.97	46.05	46.1	46.12	49.28	51.82	48.34	47.17	49.59	56.9	50.73	0	49	52.7	48.91	54.13	46.96	45.7	45.16	45.34	46.55	45.51	47.94	47.2	51.43	49.11	49.85	98.56	98.99	97.68	49.94	97.68	49.86	50.58	50.44	47.87	50.56	49	50.47
GCA_002085285_Latescibacteria	46.82	48.05	49.08	46.79	47.49	47.65	48.67	47	48.64	48.53	48.87	45.79	45.61	45.52	47.87	47.21	48.77	47.82	48.03	48.34	49.36	49	0	48.85	47.29	49.12	45.34	45.9	44.87	45.51	45.64	45.39	48.03	58.98	46.87	61.44	47.55	49.28	48.6	49.12	48.82	48.8	48.83	47.5	47.55	48.41	46.85	47.07	46.03
GCA_002085355_KSB1	45.83	47.52	49.32	47.08	47.8	50.13	48.37	46.5	48.31	48.65	48.35	44.76	45.02	45.03	48.92	52.14	47.01	46.33	49.72	51.85	50.76	52.7	48.85	0	47.63	61.18	45.13	44.78	44.08	44.23	45.03	44.37	46.65	47.17	50.67	47.85	48.78	52.53	52.57	52.47	50.96	53.4	50.12	49.6	48.75	47.09	51.08	48.38	50.7
GCA_002127415_AABM5-125-24	45.6	46.37	48	55.62	60.01	47.08	46.8	45.9	46.81	47.4	46.87	44.81	45.38	44.93	46.82	46.82	47.52	46.69	46.83	48.09	47.8	48.91	47.29	47.63	0	48.17	44.87	45.19	43.77	43.92	45.16	43.68	47.09	46.32	47.11	47.2	50.34	48.41	48.46	48.33	47.2	48.88	46.81	47.52	47.45	47.01	46.08	46.22	45.84
GCA_002127425_KSB1	46.1	47.83	49.16	47.82	48.04	51.04	48.73	46.75	48.82	48.76	48.24	45.19	44.78	44.99	49.76	52.21	47.2	46.31	49.84	51.53	50.78	54.13	49.12	61.18	48.17	0	45.01	44.06	44.4	44.34	45.21	44.66	46.88	47.44	50.66	48.09	49.39	53.42	53.09	53.41	50.82	53.53	49.48	49.85	49.48	47.53	52.35	49.33	51.07
GCA_002313925_Gemmatimonadetes	45.66	44.46	46.32	43.4	44.28	45.48	45.42	47.1	45.22	45.23	44.07	49.59	50	49.48	44.17	45.13	47.22	46.14	44.89	45.97	46.17	46.96	45.34	45.13	44.87	45.01	0	63.13	56.46	48.43	49.59	56.4	45.91	44.09	45.9	45.45	45.01	46.29	45.79	45.69	44.64	45.84	45.21	46.27	46.04	46	45.26	44.21	44.55
GCA_002348465_Gemmatimonadetes	45.55	44.44	45.22	43.8	44.05	44.56	45.03	47.02	44.66	45.31	44.58	49.2	49.6	49.36	44.7	44.67	46.51	45.74	44.93	45.64	45.23	45.7	45.9	44.78	45.19	44.06	63.13	0	55.09	47.95	49.56	55.42	45.77	44.66	45.56	45.6	44.76	45.66	45.69	45.75	44.29	45.64	45.15	45.82	45.89	46.21	44.16	44.25	44.12
GCA_002348755_Gemmatimonadetes	44.99	43.51	44.81	42.76	43.56	44.12	44.02	45.39	43.77	44.24	43.28	48.03	47.76	47.88	44.43	44	45.74	44.41	44.59	45.62	44.78	45.16	44.87	44.08	43.77	44.4	56.46	55.09	0	47.06	48.04	97.88	44.51	43.72	44.87	44.79	44.28	44.68	45.1	45.11	44.1	45.06	44.34	45.39	44.96	45.23	44.08	43.71	43.64
GCA_002404375_Gemmatimonadetes	44.29	44.24	45.89	42.86	43.58	45.32	44.63	45.56	44.66	44.82	43.84	57.78	59.6	57.2	45.27	44.37	47.22	46.15	44.13	46.46	44.88	45.34	45.51	44.23	43.92	44.34	48.43	47.95	47.06	0	57.52	46.89	46.34	43.11	45.51	44.83	44.74	44.97	45.14	45.35	43.63	45.32	44.96	45.11	45.75	46.09	44.32	43.73	43.54
GCA_002483225_Gemmatimonadetes	45.63	45.94	46.31	43.99	44.17	45.54	45.82	46.75	45.69	44.77	44.67	72.79	59.67	73.8	44.5	44.53	48.07	46.91	44.81	46.09	45.51	46.55	45.64	45.03	45.16	45.21	49.59	49.56	48.04	57.52	0	48.31	47.29	44.37	46.15	46.18	45.87	45.56	45.83	45.69	44.39	45.93	45.2	46.09	46.25	46.75	44.39	43.78	44.2
GCA_002500425_Gemmatimonadetes	44.85	43.36	44.61	43.15	43.96	44.36	43.95	45.76	43.64	44.59	43.58	48.31	48.01	48.15	44.43	44.76	45.77	44.7	44.57	45.55	45.1	45.51	45.39	44.37	43.68	44.66	56.4	55.42	97.88	46.89	48.31	0	44.99	43.88	44.81	44.99	44.56	45.02	45.32	44.94	44.18	44.83	44.41	45.28	44.75	45.63	44.37	43.71	44.04
GCA_003235575_Eisenbacteria	47.38	47.84	48.68	44.87	45.76	46.79	48.53	49.02	48.58	48.4	47.58	46.83	47.17	46.99	45.76	46.02	54.47	52.97	46.05	47.17	46.59	47.94	48.03	46.65	47.09	46.88	45.91	45.77	44.51	46.34	47.29	44.99	0	46.84	47.01	48.19	47.72	47.58	47.85	47.46	45.59	47.8	46.53	47.24	46.99	48.76	45.69	45.17	45.01
GCA_003369455_Latescibacteria	45.56	47.17	48.2	45.35	46.38	46.61	47.28	46.26	47.42	47.66	47.46	44.37	44.5	44.39	46.3	46.29	47.53	45.72	46.39	47.01	46.2	47.2	58.98	47.17	46.32	47.44	44.09	44.66	43.72	43.11	44.37	43.88	46.84	0	45.54	58.07	46.36	47.46	47.01	47.03	47.3	47.09	46.05	46.05	45.83	47.12	46.19	45.78	45.82
GCA_003576975_KSB1	46.02	46.59	47.5	46.16	45.99	49.1	46.59	46.4	46.37	46.31	45.63	46.23	46.58	45.78	48.82	50.73	47.77	47.04	48.5	50.34	48.51	51.43	46.87	50.67	47.11	50.66	45.9	45.56	44.87	45.51	46.15	44.81	47.01	45.54	0	47.37	48.32	50.89	51.16	51.71	48.07	51.48	47.94	49.83	49.33	47.65	49.05	48.17	49.09
GCA_003599105_Latescibacteria	46.25	48.53	48.5	46.29	45.68	47.53	49.2	47.86	48.97	48.3	48.77	46.61	46.85	46.4	47.55	46.09	49.04	48.08	46.79	48.8	48.53	49.11	61.44	47.85	47.2	48.09	45.45	45.6	44.79	44.83	46.18	44.99	48.19	58.07	47.37	0	48.15	48.61	49.29	48.42	46.82	48.23	45.63	47.2	47.48	49.1	46.73	46.5	45.61
GCA_003599535_AABM5-125-24	46.41	46.77	47.52	49.09	49.73	47.91	47.3	46.37	47.3	47.11	46.56	45.82	46.1	45.89	47.76	47.54	48.15	47.36	47.77	48.79	48.28	49.85	47.55	48.78	50.34	49.39	45.01	44.76	44.28	44.74	45.87	44.56	47.72	46.36	48.32	48.15	0	49.05	48.94	49.1	48.24	49.51	47.64	48.14	48.31	48.02	47.43	47.33	46.65
GCA_003644765_KSB1	46.44	47.23	49.13	47.63	48.24	51.35	48.16	46.65	48.11	47.75	47.75	45.6	45.13	45.48	49.26	51.59	47.47	47.03	48.97	56.74	50.5	98.56	49.28	52.53	48.41	53.42	46.29	45.66	44.68	44.97	45.56	45.02	47.58	47.46	50.89	48.61	49.05	0	98.73	98.28	50.84	98.03	49.63	50.39	50.19	47.99	50.47	48.63	49.88
GCA_003644775_KSB1	46.42	47.59	48.63	47.51	48.05	50.94	47.99	46.21	48.01	47.63	47.98	45.71	45.61	45.52	49.17	51.65	47.86	47.08	49.32	56.86	50.42	98.99	48.6	52.57	48.46	53.09	45.79	45.69	45.1	45.14	45.83	45.32	47.85	47.01	51.16	49.29	48.94	98.73	0	98.67	50.81	98.02	49.56	50.18	50.18	48.15	50.21	48.53	49.92
GCA_003644785_KSB1	46.41	47.29	48.6	47.33	48.2	51.06	47.57	46.5	47.58	47.84	47.49	45.75	45.83	45.58	49.33	51.61	48.17	47.42	49.41	57.19	50.87	97.68	49.12	52.47	48.33	53.41	45.69	45.75	45.11	45.35	45.69	44.94	47.46	47.03	51.71	48.42	49.1	98.28	98.67	0	51	97.35	49.74	49.87	50.57	48.16	50.44	48.72	49.71
GCA_003645915_KSB1	45.69	46.82	48.4	47.06	46.59	53.88	47.53	46.12	47.7	47.35	46.74	44.25	44.41	44.23	48.08	50.3	47.04	45.95	48.87	50.02	49.9	49.94	48.82	50.96	47.2	50.82	44.64	44.29	44.1	43.63	44.39	44.18	45.59	47.3	48.07	46.82	48.24	50.84	50.81	51	0	50.89	49.86	47.9	47.92	46.61	49.21	47.79	48.56
GCA_003645965_KSB1	46.43	47.64	49.16	47.71	47.63	51.2	48.27	46.32	48.38	47.72	48.24	45.81	46.05	45.89	49.52	51.83	47.61	46.99	49.7	56.89	50.61	97.68	48.8	53.4	48.88	53.53	45.84	45.64	45.06	45.32	45.93	44.83	47.8	47.09	51.48	48.23	49.51	98.03	98.02	97.35	50.89	0	49.61	50.19	50.23	48.44	51.04	48.96	50.9
GCA_003650235_Calditrichaeota	45.33	45.4	46	46.8	46.32	47.82	46.23	45.43	46.27	46.21	45.43	45.27	44.97	44.82	50.25	49.73	46.94	46.23	67.21	50.49	52.69	49.86	48.83	50.12	46.81	49.48	45.21	45.15	44.34	44.96	45.2	44.41	46.53	46.05	47.94	45.63	47.64	49.63	49.56	49.74	49.86	49.61	0	51.25	51.03	46.25	50.78	57.23	50.04
GCA_003695965_Calditrichaeota	46.91	46.8	48.18	47.27	47.39	49.2	47.39	46.69	47.45	47.53	46.15	45.75	45.96	45.81	55.23	49.3	47.94	46.99	51.53	50.97	57.55	50.58	47.5	49.6	47.52	49.85	46.27	45.82	45.39	45.11	46.09	45.28	47.24	46.05	49.83	47.2	48.14	50.39	50.18	49.87	47.9	50.19	51.25	0	60.88	47.81	48.26	50.24	48.18
GCA_003696445_Calditrichaeota	46.46	46.97	47.45	46.96	47.15	48.74	47.18	46.4	47.26	47.11	46.29	46.2	46.54	46.22	55.59	48.63	47.81	47.04	51.66	51.01	58.15	50.44	47.55	48.75	47.45	49.48	46.04	45.89	44.96	45.75	46.25	44.75	46.99	45.83	49.33	47.48	48.31	50.19	50.18	50.57	47.92	50.23	51.03	60.88	0	47.51	48.32	50.29	48.06
GCA_003820615_GB-CP12	57.72	48.95	50.16	45.53	46.98	47.23	49.31	49.14	49.29	49.49	48.33	47.08	47.36	46.82	47.06	46.84	49.78	49.01	47.06	47.79	47.62	47.87	48.41	47.09	47.01	47.53	46	46.21	45.23	46.09	46.75	45.63	48.76	47.12	47.65	49.1	48.02	47.99	48.15	48.16	46.61	48.44	46.25	47.81	47.51	0	46.75	46.35	46.3
GCA_003854975_KSB1	45.34	46.67	47.65	46.31	46.85	51.32	46.74	45.58	46.9	46.72	46.55	44.44	44.97	44.79	48.29	56.73	46.3	45.43	48.79	49.86	49.83	50.56	46.85	51.08	46.08	52.35	45.26	44.16	44.08	44.32	44.39	44.37	45.69	46.19	49.05	46.73	47.43	50.47	50.21	50.44	49.21	51.04	50.78	48.26	48.32	46.75	0	48.72	70.33
GCA_003854985_Calditrichaeota	45.08	45.31	46.04	46.26	46.37	49.55	45.77	45.38	45.9	45.6	45.4	44.01	44.12	43.87	50.78	48.66	46.03	44.48	58.17	48.87	51.45	49	47.07	48.38	46.22	49.33	44.21	44.25	43.71	43.73	43.78	43.71	45.17	45.78	48.17	46.5	47.33	48.63	48.53	48.72	47.79	48.96	57.23	50.24	50.29	46.35	48.72	0	48.08
GCA_003854995_KSB1	44.94	46.22	47.13	45.34	46.04	50.78	46.59	45.1	46.65	46.64	46.27	44.01	44.34	43.61	48.54	56.44	46.02	45.07	48.02	49.6	49.65	50.47	46.03	50.7	45.84	51.07	44.55	44.12	43.64	43.54	44.2	44.04	45.01	45.82	49.09	45.61	46.65	49.88	49.92	49.71	48.56	50.9	50.04	48.18	48.06	46.3	70.33	48.08	0
GCA_003855055_Calditrichaeota	45.02	46.08	46.78	46.7	46.67	56.13	46.84	45.05	46.81	48.17	46.53	44.63	44.8	44.55	55.54	50.54	46.17	45.78	48.78	49.45	54.69	50.95	48.02	50.33	47.03	51.1	44.67	45.01	44.18	43.78	44.85	44.35	46.2	46.03	48.09	47.32	47.7	50.91	50.36	50.21	52.9	50.31	49.38	51.23	51.28	46.55	49.57	49.15	49.04
GCA_004356825_KSB1	45.67	46.11	47.52	46.32	46.87	48.9	46.62	46.61	46.53	46.61	46.46	44.85	44.82	45.04	48.48	50.69	47.34	45.97	48.87	50.53	49.94	51.85	47.09	51.25	47.05	51.83	45.81	45.85	45.33	44.64	44.92	45.5	46.66	46.05	53.11	47.36	48.27	51.14	51.63	51.84	48.58	51.39	48.6	50.21	49.35	46.24	49.79	48.51	49.45
GCA_005223185_AABM5-125-24	45.66	46.08	47.38	48.31	49.82	47.89	46.53	45.49	46.45	47.42	46.19	45	45.11	45.27	47.11	47.43	46.73	46.23	47.73	48.85	48.41	49.22	47.02	48.55	50.17	49.33	45.12	45.01	44.14	44.06	45.27	44.03	46.76	46.45	47.95	47.33	60.63	48.48	48.77	48.69	47.77	48.95	47.68	48.04	47.47	46.76	47.2	47.02	46.41
GCA_005893165_Eisenbacteria	47.07	47.97	48.87	44.9	46.34	47.42	48.26	47.51	48.05	47.87	47.7	46.95	47.52	46.82	45.71	46.26	53.3	52.18	46.08	47.77	46.35	47.99	48.51	46.8	46.39	47.35	46.05	46.1	44.47	47.11	46.72	45.02	64.34	46.04	47.34	49.15	47.4	47.25	47.64	47.7	46.32	47.87	46.17	47.47	47.51	48.99	45.92	45.3	44.83
GCA_005893175_Eisenbacteria	47.57	48.05	49.11	45.46	46.35	47.06	48.3	47.89	48.35	48.27	47.67	47.01	47.14	46.64	45.77	46.12	53.25	52.04	45.95	47.64	46.79	47.93	48.46	46.54	46.51	47.18	45.86	45.78	44.33	47.11	46.53	45.05	64.67	46.47	47.1	48.6	47.33	47.41	47.41	47.61	46.24	47.82	45.99	47.39	47.45	49.7	45.76	45.22	45.31
GCA_005893185_Eisenbacteria	46.82	47.6	48.53	45.08	45.39	46.54	47.56	47.56	47.65	47.11	47.19	46.64	47.54	46.49	45.19	46.18	68.09	67.5	45.67	47.45	46.73	47.66	47.23	45.91	46.46	46.59	46.27	46.12	44.5	47.06	46.73	45.01	51.92	46.16	47.25	48.2	46.95	47.7	47.3	47.35	45.2	47.23	45.45	47.32	46.62	48.47	45.63	44.84	44.84
GCA_005893195_Eisenbacteria	46.46	47.9	48.03	44.54	45.7	47.3	47.71	47.72	47.68	47.24	46.99	46.6	47.04	46.43	45.51	45.75	53.4	51.9	45.92	47.61	45.9	48.43	48.15	46.44	45.97	46.78	45.71	45.53	44.11	46.11	46.28	44.67	64.19	46.03	47.3	48.56	47.19	47.71	47.77	47.54	45.83	47.78	45.83	47.24	47.32	49.4	45.87	45.27	45.27
GCA_005893225_Eisenbacteria	46.8	47.56	48.52	44.85	45.52	46.59	47.45	47.39	47.65	46.44	46.47	46.62	47.9	46.38	44.97	45.91	68.5	67.9	45.35	47.73	46.55	46.79	47.33	45.91	46.56	46.17	46.43	46.15	44.57	47.03	46.65	44.6	52.15	45.62	47.21	47.7	46.72	46.86	46.97	46.72	45.99	47.12	45.14	46.78	46.53	48.24	45.35	44.57	45.29
GCA_005893265_Eisenbacteria	47.38	47.93	49.07	45.57	45.98	47.18	48.06	47.64	48.04	47.92	47.85	46.9	47.08	46.62	45.61	46.2	53.39	51.99	45.71	47.54	46.8	47.6	48.56	46.72	46.57	47.7	45.53	45.62	44.05	47.09	46.32	44.83	64.72	46.14	47.05	48.68	47.37	47.14	47.22	47.58	46.04	47.56	45.51	47.11	46.95	49.23	45.88	45.22	45.3
GCA_005893275_Eisenbacteria	47.41	47.97	49.01	44.99	46.26	46.91	48.27	47.74	48.25	48.45	47.69	46.78	47.3	46.35	45.97	46.08	53.63	52.3	46.03	47.74	46.69	48.04	48.42	46.65	46.75	47.55	46.02	45.93	44.5	47.1	46.78	44.91	65.04	46.61	47.15	49.14	47.48	47.39	47.38	47.23	46.35	47.44	45.65	47.44	47.06	49.38	45.88	45.19	45.21
GCA_005893295_Eisenbacteria	46.74	47.6	48.47	45.29	45.69	46.4	47.9	47.85	47.86	47.99	46.82	46.53	47.9	46.49	45.04	45.9	67.06	66.26	45.62	47.21	47.08	47.52	47.57	45.91	46.31	46.46	46.59	46.02	45.12	46.56	46.72	45.18	52.42	46.59	46.99	48.99	46.84	47.36	47.1	47.17	45.87	46.93	45.52	47.24	46.78	48.53	45.59	45.11	45.08
GCA_005893305_Eisenbacteria	48.13	47.63	48.48	45.19	45.99	46.84	47.87	48.2	47.82	48.54	47.51	47.01	47.25	46.43	45.7	46.22	53.88	52.15	46.56	47.58	46.34	48.21	48.33	47.03	46.96	46.81	45.84	45.86	44.68	46.93	46.69	45.02	66.36	46.38	47.32	48.21	47.42	47.37	47.73	47.91	46.05	47.78	46.48	47.54	47.31	49.75	45.86	45.43	45.09
GCA_005893365_Eisenbacteria	46.15	46.91	47.46	44.02	45.35	45.9	47.18	47.65	47.15	46	46.09	46.46	47.13	46.12	45.05	45.4	66.7	66.39	44.98	46.77	46.33	46.6	46.79	45.53	46.16	45.06	45.13	45.07	43.43	46.25	46.44	43.5	51.41	44.69	46.69	46.92	46.35	46.21	46.49	46.21	44.45	46.85	45.36	46.96	46.61	48.23	45.01	44.25	44.92
GCA_007695195_Gemmatimonadetes	45.34	45.53	46.34	44.63	45	45.66	45.99	47.17	46	45.16	44.28	49.88	50.26	49.84	45.44	44.96	47.48	46.71	45.34	46.76	46	46.33	46.43	45.19	45.93	45.53	55.73	55.33	53.21	49.23	50.04	53.51	46.6	44.76	45.93	46.39	45.8	45.97	45.8	46.18	44.73	45.74	45.18	46.25	46.22	47.39	44.64	44.27	44.08
GCA_008363195_KSB1	46.22	46.5	47.38	46.34	46.34	48.95	46.5	46.71	46.38	45.99	45.78	46.08	46.64	45.84	48.71	50.71	48.06	47.12	48.38	50.3	48.88	51.66	46.71	50.29	47.05	50.81	45.83	45.57	44.87	45.42	46.08	44.69	46.89	45.47	96.87	47.33	48.22	51.06	51.21	51.85	47.86	51.35	48.52	50.06	49.8	47.39	48.94	48.22	48.82
GCA_008501545_KSB1	46.24	45.82	46.45	45.83	46.19	48.89	46.04	46.13	45.89	46.62	46.09	44.9	44.86	44.25	48.08	49.58	46.14	45.58	49.27	49.33	48.97	49.98	46.72	50.25	46.37	50.14	45.26	44.71	44.17	44.54	44.79	44.46	45.75	46.13	51.83	45.86	47.02	49.15	49.84	50.14	47.33	49.58	49.06	49.25	48.29	46.57	49.53	48.55	48.48
GCA_008501765_KSB1	45.67	45.21	46.32	45.62	45.82	48.11	45.68	45.91	45.6	45.95	45.31	44.71	44.41	44.63	48.14	48.81	45.98	45.12	48.43	49.08	49.64	49.29	46.55	49.52	45.82	50.03	45.1	45.12	44.68	44.41	44.68	44.64	45.19	45.75	51.51	46.35	46.62	49.19	49.24	49.31	47.96	49.59	48.27	49.21	48.49	46.47	48.83	48.47	48.43
GCA_008501795_Calditrichaeota	45.24	44.25	45.31	45.36	45.48	47.57	45.14	45.57	45.06	45.38	44.48	43.98	44.32	44.15	49.31	48.15	46.08	44.71	54.83	48.2	50.41	48.24	46.02	48.05	45.31	48.83	44.41	44.48	44.3	43.48	43.86	44.23	45.17	45.35	47.8	45.45	46.42	47.75	47.57	47.68	47.4	48.1	54.7	50.28	49.59	45.75	48.08	55.19	46.95
GCA_009837975_Gemmatimonadetes	45.78	45.36	46.64	44.35	44.34	45.66	45.75	47.28	45.67	45.74	44.77	49.2	49.58	48.96	44.63	44.87	47.57	46.73	45.18	46.36	46.23	45.93	46.57	45.14	45.71	45.53	52.83	52.54	50.84	48.05	49.54	50.85	47.13	44.3	45.8	46.06	45.47	45.81	45.72	45.78	44.49	45.69	44.41	46.34	46.2	47.18	44.91	44.57	44.61
GCA_010024675_Gemmatimonadetes	45.66	45.9	46.29	45.14	44.09	46.79	46.12	47.13	46.12	46.16	44.76	75.38	61.03	81.01	45.05	45.41	47.65	46.68	45.41	46.72	46.91	46.55	46.31	45.73	45.76	45.5	49.41	49.42	48.67	57.79	75.76	48.28	47.33	45.51	46.55	46.5	46.46	46.46	46.3	46.36	45.2	45.76	46.18	46.59	47.43	47.27	45.27	45	44.53
GCA_011321715_Calditrichaeota	45.99	47.34	47.9	47.65	47.33	49.1	47.6	46.02	47.44	46.68	46.49	45.12	45.68	45.34	62.37	49.4	46.98	46.42	52.73	50.2	97.51	49.91	48.46	51.05	47.42	50.59	45.97	46.26	45.58	44.63	45.19	45.57	46.8	46.03	48.3	47.01	47.75	50.3	50.31	50.24	48.95	50.99	52.58	56.79	57.83	47.12	49.03	51.37	48.44
GCA_011357805_Eisenbacteria	47.42	47.64	48.26	45.24	45.63	46.74	48.24	48.05	48.47	46.64	47.02	47.2	48.07	46.99	45.23	45.95	66.81	66.21	45.8	47.44	46.51	47.02	47.57	45.98	47.06	46.66	46.16	46.33	44.42	46.26	47.5	44.54	52.88	45.78	47.55	47.88	47.59	47.04	46.91	46.99	45.23	47.09	46.47	47.36	46.97	49.39	45.57	44.6	45.46
GCA_011525845_Gemmatimonadetes	45.76	45.51	46.72	44.28	44.57	45.81	45.56	46.71	45.47	45.05	45.23	59.47	59.54	59.29	44.66	44.83	48.18	47.38	44.81	46.53	46.19	46.44	45.6	44.37	45.51	44.89	49.77	49.8	48.27	58.88	59.6	48.5	47.25	44.32	46.5	46.89	46.04	46.05	46.07	46.48	44.66	46.34	45.13	46.59	46.48	47.16	44.95	44.58	44.57
GCA_011771255_Latescibacteria	47.58	47.2	47.79	46.18	47.03	47.38	47.38	47.47	47.5	48.7	47.19	45.58	45.93	45.32	46.76	47.2	48.81	47.35	47.24	48.59	48.09	48.7	52.12	47.6	46.97	48.29	45.87	45.22	44.67	44.45	45.81	45.12	47.68	49.76	46.91	50.86	46.49	48.47	48.25	48.24	47.4	48.4	46.41	48.5	47.63	48.82	46.43	46.56	45.98
GCA_011771545_Latescibacteria	47.65	47.23	47.8	46.56	46.83	47.19	47.67	47.34	47.75	47.9	47.59	45.45	45.76	45.22	46.85	47.16	48.66	47.19	47.24	48.4	48.32	48.62	51.7	47.92	47.03	48.59	45.75	45.09	44.91	44.67	45.55	45	47.51	49.54	46.74	50.81	46.68	48.27	48.07	47.94	47.2	48.29	46.52	48.19	47.58	48.82	46.29	46.34	46.02
GCA_011771745_Latescibacteria	47.45	47.44	47.96	46.52	46.95	46.96	47.78	47.37	47.87	48.47	48.11	45.35	45.59	45.17	46.91	47.23	48.49	47.13	47.08	48.75	48.22	48.55	51.68	47.9	47.15	48.55	45.63	44.84	44.73	44.5	45.49	44.8	47.47	49.47	46.65	50.57	46.73	48.25	47.99	47.96	47.24	48.41	46.44	48.08	47.51	48.97	46.45	46.42	46.13
GCA_011771965_Latescibacteria	47.7	47.03	47.68	46.5	46.97	47.4	47.43	47.39	47.53	47.92	47.94	45.47	45.76	45.18	46.9	47.34	48.45	47.03	47.48	48.25	47.9	48.41	51.62	47.78	46.96	48.42	45.68	45.18	44.86	44.68	45.5	44.79	47.26	49.63	46.7	51.31	46.69	48.02	47.91	47.95	47.02	48.12	46.45	48.35	47.6	48.84	46.41	46.74	46.25
GCA_011772205_Latescibacteria	47.19	47.23	47.79	46.43	47.5	47.21	47.35	47.63	47.52	48.71	48.53	45.32	45.54	45.04	47.27	47.22	48.12	47	47.26	48.4	47.82	48.13	51.51	47.55	47.13	48.25	45.49	45.11	44.84	44.55	45.39	44.69	47.26	49.83	46.78	51.23	47.07	47.78	47.64	47.64	46.78	47.97	46.31	48	47.43	49.04	46.4	47.02	46.33
GCA_011772705_Latescibacteria	47.51	47.09	47.79	46.48	47.01	47.25	47.4	47.36	47.47	48.29	48.25	45.36	45.7	45	46.96	47.31	48.25	46.93	47.38	48.32	47.87	48.17	51.58	47.64	47.13	48.27	45.65	45.1	44.86	44.6	45.42	44.68	47.22	49.66	46.74	51.27	46.77	47.75	47.76	47.75	46.76	48.06	46.45	48.19	47.55	48.95	46.29	46.9	46.17
GCA_011773335_Gemmatimonadetes	47.26	46.29	46.93	44.07	44.2	46.85	46.53	47.43	46.35	46.25	46.14	51.58	52.03	51.27	45.98	45.74	48.64	47.73	45.87	47.22	46.56	47.22	46.56	45.17	46.28	46.09	50.59	50.54	48.55	51.1	51.66	48.53	47.24	44.66	46.58	46.93	46.04	46.29	46.33	46.5	45.29	46.38	45.56	47.54	47.12	47.44	45.8	45.09	45.85
GCA_011773505_Latescibacteria	47.19	47.21	47.79	46.44	47.51	47.12	47.31	47.63	47.48	48.68	48.53	45.35	45.55	45.03	47.24	47.23	48.18	47.01	47.24	48.38	47.77	48.12	51.52	47.57	47.12	48.28	45.49	45.13	44.79	44.53	45.43	44.68	47.25	49.83	46.8	51.23	47.05	47.75	47.64	47.65	46.8	47.97	46.3	48.04	47.42	49.07	46.37	47.01	46.33
GCA_011773645_Latescibacteria	47.58	47.2	47.79	46.18	47.03	47.38	47.38	47.47	47.5	48.7	47.19	45.58	45.93	45.32	46.76	47.2	48.81	47.35	47.24	48.59	48.09	48.7	52.12	47.6	46.97	48.29	45.87	45.22	44.67	44.45	45.81	45.12	47.68	49.76	46.9	50.86	46.49	48.47	48.25	48.24	47.4	48.4	46.41	48.5	47.63	48.87	46.43	46.56	45.98
GCA_011773975_Latescibacteria	47.64	47.03	47.67	46.51	46.92	47.43	47.38	47.36	47.48	48.01	47.94	45.49	45.77	45.16	46.9	47.29	48.41	46.98	47.46	48.26	47.9	48.38	51.65	47.72	46.96	48.43	45.75	45.24	44.92	44.64	45.5	44.86	47.23	49.66	46.71	51.33	46.67	47.95	47.87	47.93	46.93	48.09	46.45	48.25	47.58	48.85	46.31	46.74	46.13
GCA_011774205_KSB1	46.07	47.09	47.33	46.31	47.26	49.61	47.03	46.75	47.15	46.87	46.75	45.55	45.64	45.45	49.51	51.41	47.94	46.75	49.28	51.47	50.34	52.69	47.41	51.68	47.63	51.64	45.89	45.89	45.06	45.53	45.51	45.18	46.85	46.33	53.89	47.31	48.46	52.28	52.01	52.39	48.65	52.41	49.36	51.31	50.26	47.15	49.53	48.62	49.89
GCA_011775825_KSB1	46.12	47.21	47.32	46.25	47.24	49.6	47.05	46.75	47.13	46.97	46.71	45.55	45.69	45.46	49.51	51.46	47.87	46.76	49.23	51.54	50.35	52.75	47.43	51.77	47.62	51.64	45.92	45.91	45.07	45.54	45.53	45.17	47	46.3	53.91	47.3	48.45	52.29	52.01	52.39	48.62	52.49	49.29	51.2	50.21	47.14	49.57	48.59	49.9
GCA_011776485_KSB1	46.05	47.06	47.37	46.18	47.15	49.57	46.96	46.74	47.08	46.88	46.87	45.46	45.59	45.37	49.47	51.48	47.87	46.75	49.26	51.47	50.23	52.69	47.45	51.76	47.56	51.74	45.93	45.9	45.13	45.49	45.5	45.11	46.84	46.33	53.94	47.3	48.38	52.26	51.96	52.43	48.66	52.5	49.27	51.14	50.16	47.22	49.53	48.6	49.92
GCA_011777055_KSB1	46.07	47.09	47.33	46.31	47.26	49.61	47.03	46.75	47.15	46.87	46.75	45.55	45.64	45.44	49.51	51.41	47.94	46.74	49.28	51.47	50.34	52.69	47.41	51.66	47.64	51.64	45.89	45.89	45.06	45.53	45.51	45.18	46.86	46.36	53.87	47.31	48.46	52.28	52.01	52.39	48.65	52.41	49.36	51.33	50.25	47.17	49.53	48.62	49.89
GCA_013003415_Eisenbacteria	47.31	46.14	47.52	44.96	45.25	45.75	47.03	48.78	47.13	47.05	46.86	46.11	45.84	46.02	45.68	46.57	50.55	49.37	46.89	47.34	47.3	47.38	47.92	47.36	46	47.21	46.11	45.66	45.13	45.43	46.12	45.52	49.35	46.48	46.28	47.97	47.07	46.93	47.05	46.76	46	47.39	46.28	47.42	47.54	49.07	46.74	45.68	46.03
GCA_013003805_Gemmatimonadetes	46.92	46.21	46.71	44.7	44.7	46.24	46.41	48.53	46.35	45.79	45.32	51.97	53	52.32	45.71	45.45	48.58	48.16	46.32	47.04	47.07	46.98	46.21	45.79	46.16	45.57	50.83	50.32	48.33	51.59	52.47	48.33	48.14	44.75	47.1	46.63	46.29	46.63	47.01	46.66	45.58	46.74	46.3	47.36	47.71	46.88	45.26	45.3	45.01
GCA_013140805_Eisenbacteria	46.8	46.95	48	45.03	45.3	46.35	47.81	47.84	47.64	46.77	46.39	47.16	47.55	46.88	45.36	45.18	64.65	63.63	45.37	46.67	46.89	46.62	47.65	45.98	46.19	46.24	46.28	46.32	44.74	46.29	47	44.97	52.06	46.07	46.97	47.88	46.54	46.49	46.59	46.53	44.76	46.9	45.4	46.72	46.77	48.96	45.66	45.02	45.36
GCA_013151735_KSB1	46.88	47.02	47.79	47.61	47.48	50.33	47.65	46.3	47.64	46.58	46.46	45.63	45.47	45.37	48.74	50.13	47.61	46.8	49.86	56.87	51.01	58	48.77	51.3	47.97	52.37	45.77	45.75	44.81	44.83	45.57	44.98	47.22	46.86	50.05	47.21	48.72	57.8	57.96	58.19	50.48	57.78	50.11	50.15	50.5	47.27	49.79	48.87	49.12
GCA_013152225_KSB1	45.85	46.38	48.01	46.82	47.16	51.07	47.06	45.79	46.97	46.54	45.76	44.77	44.55	44.54	48.55	58.96	46.17	45.68	49.83	50.67	51.05	52.28	47.51	53.32	47.33	52.73	45.33	44.6	44.55	44.47	44.35	44.78	45.91	46.18	49.76	46.62	47.97	51.99	51.57	51.92	50.57	52.57	50.76	49.27	49.1	46.73	58.22	48.97	57.82
GCA_013152765_KSB1	47.04	48.26	49.42	48.15	48.09	50.97	48.76	46.58	48.83	48.11	47.09	46.25	46.4	46.26	48.95	52.11	48.25	47.64	49.67	54.09	50.27	54.16	49.06	53.02	49.09	52.79	46.47	45.97	45.39	45.59	46.51	45.7	47.55	46.6	51.45	48.06	49.97	53.52	53.41	54.02	50.26	53.6	49.34	50.61	50.59	48.29	51.53	48.69	50.88
LQ108M_Bin_12_GB-CP12	61.88	47.77	48.04	44.92	45.78	46.57	48.11	49.22	48.02	47.68	46.7	45.8	45.87	45.72	45.84	45.92	48.69	47.56	46.53	46.7	46.85	47.38	47.47	46.43	45.72	46.78	45.93	45.9	44.81	44.81	45.81	44.82	48	46.23	46.74	48.1	46.53	46.97	46.61	46.49	45.03	47.23	45.64	47.54	47.18	58	46.19	45.55	45.82
M3_10_Bin_262_GB-CP12	48.61	47.52	48.4	45.38	46.26	46.06	47.98	73.46	48	48.37	47.15	46.64	47.05	46.61	45.54	46.84	50.39	49.42	46.65	47.17	46.97	47.02	48.28	46.88	46.75	46.39	47.01	46.62	45.06	46.04	46.32	45.47	48.21	46.29	46.6	48.16	47.15	46.79	46.64	46.87	46.16	46.82	45.74	47.14	47.15	49.01	46.24	45.96	45.87
M3_22_Bin_282_GB-CP12	48.89	47.96	48.37	46.25	46.71	46.07	48.51	73.8	48.37	47.74	47.16	46.58	46.96	46.63	45.58	46.43	50.22	49.22	46.22	47.32	47.24	47.29	48.05	46.64	46.83	46.38	46.79	46.65	44.78	45.6	46.68	45.21	48.61	46.64	46.7	48.61	47.21	46.87	46.99	47.16	46.24	46.78	45.05	47.05	47.09	49.48	46.21	45.58	45.51
M3_30_Bin_374_GB-CP13	47.42	49.92	50.47	45.81	46.36	47.03	50.26	47.02	50.24	61.53	69.86	44.87	45.21	45.11	46.3	46.35	48.5	47.61	46.27	46.64	47.91	48.12	48.48	48.2	46.75	48.7	44.97	44.96	44	44.16	44.76	44.19	48.16	47.33	46.1	48.44	46.79	48.42	48.56	48.01	47.21	48.45	45.64	46.89	46.89	48.44	46.36	45.46	45.69
M3_38_Bin_215_GB-CP11	48.14	47.63	49.34	47.05	47.3	48.43	47.83	47.52	47.81	47.9	46.37	46.24	46.56	45.95	46.41	48.82	48.59	47.13	47.47	48.57	48.6	49.16	48.14	47.99	48.26	48.12	47.15	46.35	45.48	46.35	46.72	45.59	47.57	46.62	46.96	47.9	48.19	48.87	49.34	49.29	46.17	49.71	47.09	48.71	47.59	48.56	46.53	46.82	47.28
M3_44_Bin_119_GB-CP12	49.36	48.32	48.83	45.39	46.17	46.35	48.96	63.23	48.75	47.83	47.47	46.27	46.47	45.76	45.79	46.07	49.21	48.22	46.16	46.68	47.23	47.61	47.72	46.98	46.33	47.03	45.97	45.7	44.72	45.97	46.31	44.84	48.1	46.25	46.8	47.46	46.72	47.55	47.26	47.42	46.21	47.52	45.07	46.98	46.8	49.73	45.86	45.34	45.49
M3_44_Bin_198_AABM5-125-24	45.93	45.93	46.6	47.83	48.93	46.83	46.45	45.54	46.37	46.34	45.65	44.13	44.05	44.19	47.47	47.43	46.42	46.1	47.86	47.55	47.71	48.35	46.64	47.87	49.56	48.72	44.24	44.41	44.04	43.98	44.28	44.31	46.13	46.1	47.41	46.55	59.71	47.58	47.7	47.4	48.56	48.07	47.07	47.08	46.96	46.44	46.93	46.26	45.5
M8_62_Bin_157_GB-CP11	46.83	46.83	47.64	45.56	46.17	47.48	47.15	47.07	47.13	46.53	46.14	45.69	46.24	45.56	46.24	46.86	48.14	47.13	46.84	47.86	47.61	47.41	47.14	46.5	46.71	47.61	46.27	46.1	45.14	45.6	46.04	45.35	46.84	45.8	46.75	47.59	47.49	47.52	47.67	47.72	45.74	48.3	45.68	47.3	46.71	47.24	46.24	45.8	45.76
M8_62_Bin_262_AABM5-125-24	44.9	45.81	46.8	48.16	49.48	47.71	46.72	45.87	46.43	46.71	46.27	44.57	44.76	44.66	47.41	47.35	46.34	45.73	47.39	48.2	48.13	48.79	46.81	48.01	49.69	49.2	44.23	44.73	43.87	43.65	44.64	43.69	46.1	46.35	47.25	46.43	61.31	48.21	48.19	48.54	47.46	48.79	47.16	47.84	47.24	46.51	46.7	46.57	46.17
M8_62_Bin_326_GB-CP11	46.64	45.88	47.07	44.84	45.33	46.76	46.52	46.46	46.79	46.96	45.33	44.45	45.17	44.34	45.43	47	48.01	46.64	45.43	47.8	47.13	47.18	47.38	45.73	46.21	46.71	45.69	45.38	44.69	45.01	44.94	44.53	46.13	45.35	45.72	47.1	47.21	46.47	47.07	47.18	46.04	47.3	45.19	46.33	45.9	47.36	45.76	45.06	45.45
Meg19_02_Bin_5_GB-CP14	45.65	62.68	64.21	43.82	44.42	46.07	62.79	45.89	62.68	48.63	47.73	44.18	44.69	44.44	45.03	45.67	47.57	46.16	45.54	46.31	44.64	46.73	46.77	46.07	44.98	47.29	44.09	43.5	43.42	43.8	44.58	43.04	45.93	44.98	45.17	46.7	45.7	46.27	46.46	46.16	45.59	46.49	44.37	45.72	45.48	47.49	45.33	44.42	44.73
Meg19_1012_Bin_119_GB-CP11	47.09	47.19	47.92	45.95	47.33	47.53	47.7	46.08	47.75	47.96	46.65	45.38	45.88	45.43	46.1	47.2	47.66	46.81	46.48	47.72	47.05	48.2	47.78	47.32	47.07	47.86	46.2	45.68	45.26	45.1	45.41	45.55	46.81	46.26	46.59	47.96	47.47	47.91	47.73	47.92	46.41	48.08	46.09	46.94	46.89	47.67	46.41	45.72	46.02
Meg19_1012_Bin_198_AABM5-125-24	45.03	45.79	47.05	54.41	60.45	46.91	46.15	45.49	46.14	47.14	46.66	44.57	44.76	44.71	46	46.11	46.35	45.87	46.6	47.76	46.96	48.17	46.68	47.3	63.56	48.17	44.49	44.38	43.62	43.51	44.76	43.87	45.94	46.02	46.02	46.64	50.29	47.5	47.74	47.96	46.24	47.75	46.22	47	47.11	46.55	46.05	45.92	45.57
Meg19_1012_Bin_219_GB-CP14	47	73.08	98.81	45.34	46.43	47.45	72.67	47.34	72.64	49.92	50.16	45.58	45.74	45.84	46.96	47.15	48.93	48.09	46.61	47.73	47.75	48.99	48.52	48.8	47.52	49.07	45.18	44.87	44.29	44.81	45.84	44.36	48.06	47.5	47.35	48.94	47.29	48.81	48.63	48	47.98	48.67	46.23	47.51	47.1	49.36	46.96	46.08	46.62
Meg19_1012_Bin_459_AABM5-125-24	45.83	46.49	47.18	48.61	50.73	47.99	46.64	45.96	46.56	47.07	46.59	45.07	44.74	44.9	47.15	47.33	46.46	45.82	48.06	48.63	48.11	49.14	47.33	48.7	50.75	49.64	45.05	45.11	44.58	44.21	44.94	44.71	46.73	46.29	47.77	46.81	60.91	48.37	48.96	48.93	48.44	49.01	47.44	48.25	47.56	46.98	47.09	47.28	46.71
Meg19_46_Bin_182_GB-CP14	47.44	70.11	71.67	45.31	46.42	47.87	70.03	47.57	69.95	49.82	50.07	45.79	45.81	45.72	46.64	47.04	49.22	48	46.43	47.66	47.55	48.25	48.72	48.34	47.27	48.84	45.09	45.02	43.87	44.69	45.76	44.03	48.18	47.45	46.67	49.05	47.5	48.3	48.1	47.93	47.64	48.48	46.36	47.42	47.56	49.51	47.11	45.67	46.48
Meg19_46_Bin_201_GB-CP14	47.09	99.03	73.24	45.48	45.75	47.8	86.95	47.3	87.04	49.68	50.12	46.27	46.08	45.93	47.46	47.24	48.52	47.55	46.24	47.95	47.17	48.37	48.64	48.94	47.15	48.98	45.13	44.18	44.04	44.85	46.57	43.82	48.2	47.43	46.74	48.92	47.18	48.54	48.48	48.19	47.67	48.5	45.98	47.4	47.2	49.05	47.19	45.92	46.29
Meg19_46_Bin_228_GB-CP14	46.9	69	69.79	44.76	45.09	46.72	69.43	46.86	69.36	48.87	49.44	45.39	45.89	45.07	46.59	46.93	48.08	47.37	46.7	47.5	47.31	48.13	48.05	47.95	45.87	48.43	45.03	44.34	44.5	44.62	45.2	44.57	47.73	47.36	46.15	48.03	46.66	47.85	47.55	47.56	47.12	47.9	46.4	47.49	46.76	48.72	46.88	45.64	46.42
Meg19_46_Bin_239_GB-CP11	46.23	47.2	46.95	45.42	46.91	46.84	47.03	46.29	47.16	45.79	45.1	44.48	44.95	44.66	45.21	46.05	46.5	45.85	45.72	47.25	45.95	46.97	46.01	46.34	46.4	47.38	45.24	44.87	44.9	44.05	44.92	45.17	46.35	45.27	46.1	46.7	46.78	46.24	46.51	46.5	45.94	47.68	45.38	46.42	46.28	46.82	45.79	45.02	45.14
Meg19_46_Bin_247_GB-CP14	47.12	73.27	99.38	45.29	46.45	47.59	72.83	47.45	72.79	49.66	50.07	45.65	45.66	45.62	46.93	47.05	48.98	48.29	46.48	47.87	47.61	48.75	48.67	48.32	47.32	49	45.11	44.86	44.09	44.85	45.83	44.31	48.23	47.61	47.14	48.71	47.26	48.62	48.36	47.92	47.66	48.53	46.41	47.62	47.17	49.62	46.99	45.97	46.8
Meg19_46_Bin_60_GB-CP11	46.47	46.6	47.96	44.98	45.96	47.25	47.36	45.56	47.12	46.74	45.89	44.14	44.61	44.16	45.4	45.7	46.77	46.15	45.24	46.44	46.05	46.96	47.12	46.64	46.83	47.27	45.28	44.91	44.52	43.79	44.48	44.87	45.96	45.08	45.66	46.56	46.55	46.84	46.28	46.42	46.29	47.2	45.66	46.6	45.8	46.8	45.49	43.96	44.92
Meg22_02_Bin_84_GB-CP11	47.28	47.51	47.76	45.02	47.09	47.2	47.48	46.46	47.58	46.43	45.72	44.77	45.15	44.89	45.78	46.49	46.86	46.11	46.1	47.49	45.65	46.41	45.97	47.01	46.55	46.96	46.48	45.84	45.63	44.64	44.85	46.11	46.28	44.88	45.83	47.28	47.19	46.69	46.5	46.22	45.96	46.72	45.66	47.13	46.72	47.49	46.31	45.16	45.73
Meg22_1012_Bin_348_GB-CP13	48.07	50.97	51.68	46.69	47.97	47.78	51.1	48.49	51.14	74.74	62.29	45.98	46.22	46.05	47.59	46.98	49.63	48.7	47.56	47.36	48.61	49.4	49.55	49.18	48.73	48.61	46.42	46.33	44.87	45.46	46.12	45.51	49.41	48.85	47.15	49.43	48.25	48.77	48.94	48.92	48.16	48.73	47.12	47.94	47.95	50.32	47.64	46.59	47.17
Meg22_1214_Bin_137_GB-CP13	46.64	49.71	49.71	45.57	46.48	47.14	49.37	46.78	49.5	59.55	65.23	45.4	45.39	45.48	45.91	46.16	48.56	47.34	46.37	46.95	46.69	48.16	49.84	48.1	47.01	48.36	44.79	45.25	43.62	45.07	45.49	44.15	48.25	47.17	46.36	48.47	46.89	48.56	48.17	48.23	47.32	49.11	46.73	46.88	46.71	49.17	46.6	45.31	45.55
Meg22_1214_Bin_176_GB-CP13	47.43	50.55	51.39	46.21	46.94	47.64	50.5	47.86	50.52	75.2	62.31	45.3	45.61	45.04	46.68	46.81	48.89	48.1	46.85	47.42	48.22	48.3	48.98	48.43	47.66	48.5	45.88	45.55	44.28	45.49	45.34	44.94	48.64	48.06	46.97	49.32	47.26	48.25	48.47	48.43	47.48	48.59	46.48	47.39	47.34	49.75	47.08	45.72	46.38
Meg22_1416_Bin_86_AABM5-125-24	46.29	46.44	47.94	49.75	49.4	49.37	47.23	46.74	47.35	47.25	47.18	45.43	45.7	45.63	47.94	47.72	47.71	46.97	47.85	48.62	48.46	49.41	47.57	49.07	50.86	49.33	46.55	45.64	44.75	45.28	45.71	45.37	47.93	47.16	48.53	47.88	63.05	49.06	49.61	49.18	49.29	48.62	48.12	49.45	48.88	47.95	48.08	47.34	47.44
Meg22_24_Bin_124_GB-CP11	46.2	46.76	47.54	44.45	47.07	46.63	47.12	45.39	46.94	46.37	45.38	44.15	44.94	43.89	45.03	45.43	46.36	45.7	45.75	46.69	46.03	46.08	46.19	46.47	46.07	46.78	45.28	44.62	44.43	44.1	44.4	44.53	45.65	44.61	44.97	46.6	46.74	46.79	46.13	46.31	45.24	47.1	44.74	46.03	45.6	46.81	45.33	44.55	45.01
Meg22_24_Bin_129_GB-CP13	47.32	49.87	50.16	45.62	46.65	47.39	49.85	47.11	49.97	61.18	66.46	44.74	45.21	45.18	46.8	46.23	48.67	47.55	46.44	47.17	47.26	48.43	48.63	48.5	46.94	48.75	45.2	44.88	44.03	44.73	44.9	44.35	48.1	47.74	46.66	49.15	47.12	48.33	48.56	48.27	47.24	48.79	46.54	47.15	46.87	49.02	46.84	45.7	46.39
Meg22_24_Bin_156_GB-CP14	46.95	73.66	98.91	45.34	46.55	47.56	73.32	47.41	73.3	49.54	50.18	45.51	45.54	45.69	47.24	47.18	49.01	47.93	46.54	47.89	47.63	49.1	48.63	48.42	47.26	49	45.12	44.67	44.08	44.78	45.94	44.13	48.16	47.79	47.18	48.93	47.1	48.7	48.54	48.23	48.06	48.55	46.46	47.92	47.42	49.86	47.27	46.26	46.96
Meg22_46_Bin_11_GB-CP11	46.67	46.55	47.14	46.09	46.53	46.87	47.16	46.01	47.21	48.4	46.14	45.17	45.86	45.25	45.48	46.75	47.89	46.4	46.29	47.67	46.81	47.65	47.53	46.76	46.96	47.06	45.91	45.3	45.02	45.66	45.69	45.38	46.41	46.16	46.76	48.01	47.32	48.19	47.49	47.57	47.09	47.97	45.7	46.51	46.69	48.14	45.9	45.54	46.31
Meg22_46_Bin_130_GB-CP14	47.12	73.28	99.21	45.33	46.66	47.64	72.98	47.63	72.99	49.68	50.19	45.7	45.62	45.67	47.17	47.14	49.04	48.11	46.48	48.01	47.53	49	48.52	48.41	47.54	49	45.16	44.96	44.05	44.95	45.75	44.12	48.22	47.57	46.99	48.63	47.36	48.89	48.75	48.25	47.86	48.7	46.32	47.8	47.21	49.68	47.02	46.04	46.87
Meg22_46_Bin_210_GB-CP13	48.22	49.71	50.99	46.45	46.8	47.07	50.01	47.43	50.13	49.75	49.18	45.43	45.95	45.32	47.12	46.39	48.78	48.03	46.57	47.65	47.83	48.01	48.65	48.24	47.55	49.01	45.65	45.49	44.58	44.05	45.44	44.45	48.63	47.81	47.75	48.55	47.95	48.5	48.39	48.06	47.15	48.13	45.89	47.42	47.41	49.66	46.45	46.18	45.67
Meg22_46_Bin_213_GB-CP11	46.44	47.09	47.8	45.31	47.15	47.21	47.29	45.81	47.31	47.02	46.16	44.74	45.09	44.79	45.54	45.93	47.59	46.14	45.98	47.17	46.42	46.67	47.12	47.17	47.36	47.58	45.84	45.26	44.53	45.32	45.09	45.17	46.63	45.71	46.12	47.95	47.56	47.02	46.79	46.47	45.98	47.61	45.73	46.31	46.19	47.16	46.18	45.05	45.23
Meg22_46_Bin_23_AABM5-125-24	45.28	45.54	46.49	47.77	50.19	48.1	45.91	45.37	46.05	46.84	46.23	44.16	44.02	44.21	46.57	47.16	45.78	45.48	47.66	48.24	47.69	47.6	46.99	48.27	49.84	48.6	44.51	44.28	43.84	43.41	43.88	44.39	45.46	45.29	47.24	46.07	61.1	47.77	48.06	48.12	48.62	48.71	45.72	47.18	46.78	46.37	46.85	47.14	46.79
Meg22_46_Bin_45_GB-CP14	46.97	70.08	74.68	44.87	45.38	47.59	70.04	46.92	70.09	49.24	49.9	45.82	45.65	45.64	46.54	47.15	49.24	47.96	46.33	47.32	48.4	49.3	48.44	48.29	46.94	48.3	45	44.56	44.11	44.69	45.85	44.33	48.13	46.8	46.52	48.6	46.92	48.53	48.12	47.78	48.15	48.66	46.64	46.88	47.33	49.18	46.95	45.59	46.4
Meg22_46_Bin_89_GB-CP13	47.38	50.04	50.09	45.79	46.72	47.66	49.94	47.3	50.04	61.44	66.22	44.84	45.21	45.09	46.81	46.44	48.75	47.71	46.45	47.34	47.49	48.05	48.76	48.48	47.01	48.66	45.26	45.27	44.22	44.49	45.17	44.67	48.28	47.8	47.09	49.2	47.51	48.38	48.39	47.85	47.66	48.37	46.11	47.33	47.24	49.31	46.76	46.14	46.55
Meg22_810_Bin_217_AABM5-125-24	44.82	45.05	46.38	53.69	59.32	46.26	45.18	44.64	45.27	46.21	45.83	44.4	44.3	44.28	46.06	46.43	45.68	44.93	46.73	47.32	47.34	47.06	47.14	47.4	63.71	47.26	44.68	44.81	43.32	43.34	44.44	43.24	45.53	45.9	45.94	46.23	49.57	47.1	47.21	47.43	45.99	47.28	46.38	46.92	46.28	45.61	46.07	45.33	45.59
SY70_4_11_Bin_40_GB-CP11	47.21	47.87	48.99	46.03	46.39	47.17	47.96	46.32	47.85	48.7	46.99	45.39	45.71	45.21	46.27	46.79	48.07	47.15	46.57	48.41	46.97	48.66	47.72	48.07	47.6	48.61	46.04	45.86	45.36	45.33	45.75	45.06	47.32	47	47.23	47.34	47.62	48.12	47.89	47.85	46.18	48.4	46.78	47.67	46.98	47.88	46.54	45.73	46.42
SY70_4_3_Bin_44_GB-CP13	47.42	50.11	50.75	46.9	47.27	48.29	50.08	47.82	50.32	62.04	66.05	45.81	46.51	45.98	46.83	47.39	48.96	47.7	47.4	47.73	47.43	48.64	49.5	49.15	48.36	49.86	45.64	45.44	44.52	44.9	45.77	45.16	48.07	48	46.82	48.15	47.36	49.02	49.03	48.77	47.51	49.37	47.64	48.07	47.89	48.7	47.75	46.13	46.86
SY70_4_3_Bin_59_GB-CP13	46.75	49.6	50.1	45.87	48.09	47.73	49.31	47.59	49.46	76.86	62.3	44.83	45.6	44.88	46.17	47.04	48.63	47.4	45.97	46.96	47.03	48.41	48.39	49.01	47.44	48.17	46.32	45.75	44.66	45.28	45.31	45.29	48.38	48.23	47.11	48.82	47.15	48.59	48.87	48.51	47.24	48.95	45.1	47.09	46.93	48.81	46.93	45.56	46.18
SY70_4_3_Bin_68_GB-CP14	45.93	65.01	65.24	44.46	45.84	47.79	65.3	47.54	65.14	48.74	48.58	45.69	45.84	45.88	46.1	46.95	48.27	47.77	46.5	47.4	47.2	47.95	49.1	47.64	46.05	47.44	45.99	44.94	44.58	45.36	45.97	44.17	47.76	46.46	46.53	47.65	46.86	48.6	48.55	48.88	48.03	48.48	46.74	47.58	47.23	47.82	46.48	45.88	46.28
SY70_5_12_Bin_1_GB-CP14	47.24	63.49	64.15	44.79	45.8	47.39	63.55	46.9	63.55	48.58	48.81	45.21	45.62	45.48	46.38	46.9	48.81	47.66	46.67	47.74	47.28	48.28	48.5	47.31	46.43	47.56	44.79	44.64	43.59	44.46	45.3	43.75	47.8	46.92	46.29	48.78	47.04	47.67	47.84	47.92	47.69	48.07	45.95	47.07	46.97	48.58	46.53	45.74	46.85
SY70_5_5_Bin_6_GB-CP14	46.78	64.83	65.59	44.68	46.15	47.41	64.77	46.72	64.83	49.45	49.45	45.62	45.72	45.64	46.35	46.47	48.86	47.82	46.43	47.14	47.32	48.1	48.54	48.02	46.26	47.56	45.26	44.57	44.27	44.66	45.54	44.19	47.83	47.05	46.35	48.43	46.87	48.49	48.05	48.24	47.6	48.54	46.31	46.94	46.69	48.24	46.78	45.54	46.22
SY70_5_5_Bin_61_GB-CP14	47.07	65.3	65.54	44.58	45.69	47.46	65.5	48.19	65.21	49.16	48.93	45.9	46.37	45.99	46.62	46.74	48.83	47.49	46.37	47.61	47.65	48.17	48.58	47.53	46.55	48.11	45.41	44.75	44.58	46.47	46.23	44.66	47.66	46.32	46.85	48.37	46.81	48.86	48.64	48.98	47.91	49.43	46.75	47.08	46.64	48.95	46.75	45.65	46.79
SY70_5_8_Bin_20_GB-CP14	46.7	65.14	66.06	44.85	46.13	47.9	65.11	46.62	65.1	49.27	49.42	45.83	45.86	45.6	46.11	46.6	49	47.89	46.11	47.4	47.02	47.77	48.61	48.01	46.6	47.79	45.57	44.33	44.43	45.12	45.91	44.35	48.01	47.15	46.48	48.74	47.02	48.06	47.76	47.65	47.46	47.89	45.93	46.85	46.68	48.22	46.81	45.77	46.35
SY70_5_8_Bin_74_GB-CP14	47.7	63.63	64.51	46	46.12	48.03	63.97	47.91	63.93	50.14	49.79	45.65	45.79	45.65	46.98	47.37	49.75	48.55	47.45	48.65	47.99	48.19	50.18	48.78	46.76	48.3	45.9	45.13	44.94	45.78	45.77	44.68	48.48	47.7	46.69	49.26	47.96	49.13	48.76	49.27	48.25	49.66	46.23	48.13	47.6	49.65	47.23	46.74	47.19
ex4484_8_GB-CP14	46.61	66.77	67.1	45.11	45.8	47.6	67	47.14	66.99	49.15	49.56	45.28	45.9	45.1	47.38	46.48	48.3	47.78	46.42	47.79	47.21	48.67	49.06	48.49	46.57	48.78	45.02	43.83	43.66	44.6	45.19	43.57	48.26	47.16	46.55	48.83	47.4	49.26	48.69	48.55	48.19	49.74	45.9	47.04	47.03	48.98	47.08	45.09	45.74
[truncated: 90 more columns]

## Sheet: ST4
BLAST results based on 16S rRNA identity (%) and bit score. Light blue filling cells represent within-group comparasion		Meg22_46_Bin_213_GB-CP11	Meg22_24_Bin_129_GB-CP13	Meg22_46_Bin_45_GB-CP14	BHB10-38_Bin_124_GB-CP14	SY70-5-8_Bin_20_GB-CP14	Meg19_1012_Bin_459_AABM5-125-24	GCA_003599535_AABM5-125-24	GCA_005223185_AABM5-125-24	Meg19_1012_Bin_198_AABM5-125-24	GCA_002127415_AABM5-125-24	3300016590_AABM5-125-24	2713897514_AABM5-125-24	M3-44_Bin_119_GB-CP12	GCA_003820615_GB-CP12	LQ108M_Bin_12_GB-CP12
GB-CP11	Meg22_46_Bin_213	0
GB-CP13	Meg22_24_Bin_129	84.19 (239)	0
GB-CP14	Meg22_46_Bin_45	76.83 (424)	80.87 (573)	0
GB-CP14	BHB10-38_Bin_124	79.21 (634)	80.78 (569)	95.16 (1369)	0
GB-CP14	SY70-5-8_Bin_20	78.65 (610)	80.03 (532)	94 (1310)	95.23 (1592)	0
AABM5-125-24	Meg19_1012_Bin_459	80.73 (726)	83.52 (464)	80.09 (459)	82.7(682)	84.35 (1153)	0
AABM5-125-24	GCA_003599535	81.78 (773)	79.25 (414)	77.32 (466)	79.78 (675)	78.72 (616)	92.07 (1354)	0
AABM5-125-24	GCA_005223185	80.71 (726)	79.88 (440)	76.35 (424)	79.43 (676)	82.07 (1177)	93.69 (2296)	92.35 (1369)	0
AABM5-125-24	Meg19_1012_Bin_198	81.23 (756)	81.85 (412)	78.31 (531)	80.48 (730)	80.49 (1048)	86.16 (1648)	85.54 (1000)	86.14 (1646)	0
AABM5-125-24	GCA_002127415	82.48 (824)	82.25 (424)	78.56 (544)	81.01 (758)	80.74 (1066)	86.74 (1700)	85.2 (985)	86.81 (1709)	94.42 (2368)	0
AABM5-125-24	3300016590	83.91 (1106)	82.14 (424)	80.72 (481)	82.82 (669)	81.48 (953)	85.96 (1496)	86.02 (893)	85.41 (1454)	93.28 (2078)	93.56 (2102)	0
AABM5-125-24	2713897514	79.96 (1097)	79.84 (355)	75.85 (396)	78.37 (614)	78.90 (918)	84.66 (1509)	82.19 (817)	83.79 (1430)	88.41 (1840)	87.84 (1792)	87.01 (1572)	0
GB-CP12	M3-44_Bin_119	82.61 (340)	87.87 (279)	83.43 (313)	82.76 (327)	81.09 (300)	84.18 (374)	82.40 (335)	84.18 (375)	79.74 (270)	80.67 (289)	79.9 (274)	78.8 (248)	0
GB-CP12	GCA_003820615	85.49 (527)	82.75 (649)	81.21 (680)	82.71 (867)	82.33 (845)	83.57 (708)	79.94 (684)	79.8 (689)	81.17 (771)	81.23 (773)	84.48 (743)	81.54 (619)	83.89 (370)	0
GB-CP12	LQ108M_Bin_12	83.29(667)	83.53(699)	79.76(614)	82.00(845)	83.61(1314)	85.76(1391)	84.33(747)	85.10(1343)	81.12(1208)	83.43(1214)	83.67(1230)	82.62(1131)	86.67(431)	87.35(1147)	0

## Sheet: ST5
Bin ID	Taxonomy	Length (bp)	Top hit against with RNA public isolate by 2020-07-08			Top hit against with 16S Public Assembled Metagenomes by 2020-06-04
			Phylum	Identity (%)	Bit score	Highest Identity (%)	Highest Bit Score	Threshold*
Meg22_46_Bin_213	Candidatus GB-CP11	1401	Firmicutes	82	767	98	1694	1355.2
M3-44_Bin_119	Candidatus GB-CP12	722	PAUC34f	87	446	96	640	512
GCA_003820615	Candidatus GB-CP12	1000	Latescibacteria	85	1037	100	1847	1477.6
LQ108M_Bin_12	Candidatus GB-CP12	1575	WS3	86	1685		1906	1700*
Meg22_24_Bin_129	Candidatus GB-CP13	760	Latescibacteria	91	1038	99	1387	1109.6
Meg22_46_Bin_45	Candidatus GB-CP14	867	Eisenbacteria	81	684	95	1373	1098.4
BHB10-38_Bin_124	Candidatus GB-CP14	1008	Latescibacteria	83	907	99	1832	1465.6
SY70-5-8_Bin_20	Candidatus GB-CP14	1416	Latescibacteria	85	1400	99	2593	2074.4
Meg19_1012_Bin_198	Candidatus AABM5-125-24	1539	Deferribacteres	90	1958	97	2599	2079.2
GCA_002127415	Candidatus AABM5-125-24	1541	Deferribacteres	90	1982	100	2846	2276.8
3300016590	Candidatus AABM5-125-24	1412	Deferribacteres	89	1781	100	2608	2086.4
2713897514	Candidatus AABM5-125-24	1527	Deferribacteres	87	1698	90	1951	1800*
Meg19_1012_Bin_459	Candidatus AABM5-125-24	1536	Caldithrix	84	1471	95	2399	1919.2
GCA_003599535	Candidatus AABM5-125-24	962	Actinobacteria	84	928	100	1777	1421.6
GCA_005223185	Candidatus AABM5-125-24	1537	Gracilibacteria	84	1482	95	2429	1943.2
* 80% of the highest bit score was set as the threshold to determine the existence of this group in the metagenomic data, expcet for LQ108M_Bin_12 and 2713897514

## Sheet: ST6
Groups	Bin	Genome ID	Genome Name	GOLD Ecosystem Category	GOLD Ecosystem Subtype	GOLD Ecosystem Type	Isolation	Latitude	Longitude	Habitat
AABM5-125-24	2713897514	3300032516	Sediment microbial communities from Yellowstone Lake, YNP, Wyoming, USA - YL17G02_0 (*) (MER-FS) (assembled)	Aquatic	Lake	Freshwater	Lake sediments	44.5119	-110.358	Freshwater Sediment
AABM5-125-24	3300016590	3300016590	Sorted cell/s from hot spring sediment in Zodletone Spring, Oklahoma, USA - Caldithrix_bacterium_SCGC_AG-640-A22 (*) (MER-FS) (assembled)	Aquatic	Sediment	Thermal springs	Sediment from sulfide-rich spring	34.9956	-98.6889	Hotspring Sediment
AABM5-125-24	3300016590	3300008516	Marine sediment microbial communities from Aarhus Bay station M5, Denmark - 125 cmbsf. Combined Assembly of MM3PM3 (*) (MER-FS) (assembled)	Aquatic	Coastal	Marine	Aarhus Bay	56.1056	10.4633	Marine Sediment
AABM5-125-24	Meg19_1012_Bin_198	3300031111	Marine sediment archaeal communities from Little Sippewissett salt marsh, Falmouth, MA, United States - SSM-Form-13 (*) (MER-FS) (assembled)	Aquatic	Wetlands	Marine	tidal mud pond sediment	41.5758	-70.6394	Salt Marsh Sediment
AABM5-125-24	2713897514	3300031651	Salt marsh sediment microbial communities from the Plum Island Ecosystem LTER, Massachusetts, United States - Salt Marsh Sediment SW1601-210 (*) (MER-FS) (assembled)	Aquatic	Intertidal zone	Marine	Salt marsh sediment	42.722	-70.847	Salt Marsh Sediment
AABM5-125-24	2713897514	3300007511	Marine water column microbial communities of the permanently stratified Cariaco Basin, Venezuela, November cruise - 267m, 250-2.7um, replicate b (*) (MER-FS) (assembled)	Aquatic	Coastal	Marine	Cariaco Basin, Venezuela	10.5	-64.66	Seawater
AABM5-125-24	2713897514	3300022912	Seawater microbial communities from Saanich Inlet, British Columbia, Canada - SI_118_April2016_150_MG (*) (MER-FS) (assembled)	Aquatic	Inlet	Marine	inlet seawater	48.5847	-123.501	Seawater
AABM5-125-24	2713897514	3300004627	Marine microbial communities from expanding oxygen minimum zones in the Saanich Inlet - SI054_200m_RNA (Metagenome Metatranscriptome) (*) (MER-FS) (assembled)	Aquatic	Unclassified	Marine	Saanich Inlet, British Columbia, Canada	48.6	-123.5	Seawater
AABM5-125-24	2713897514	3300037424	Sediment microbial communities fromuranium-contaminated floodplain near Riverton, Wyoming, United States - RVTP2_091317_139_150 (*) (MER-FS) (assembled)	Terrestrial	Unclassified	Soil	uranium-contaminated floodplain	42.9886	-108.4	Terrestrial
AABM5-125-24	GCA_005223185	3300032053	Sediment microbial communities from Yellowstone Lake, YNP, Wyoming, USA - YL17G09_16 (*) (MER-FS) (assembled)	Aquatic	Lake	Freshwater	Lake sediments	44.508	-110.327	Freshwater Sediment
AABM5-125-24	Meg19_1012_Bin_459	3300031862	Sediment microbial communities from Yellowstone Lake, YNP, Wyoming, USA - YL17G06_40 (*) (MER-FS) (assembled)	Aquatic	Lake	Freshwater	Lake sediments	44.5094	-110.509	Freshwater Sediment
AABM5-125-24	GCA_003599535	3300037264	Sediment microbial communities from Lake Lucerne, Nidwalden, Switzerland - LL_38 (*) (MER-FS) (assembled)	Aquatic	Lake	Freshwater	sediment from oligotrophic lake	46.9968	8.347	Freshwater Sediment
AABM5-125-24	Meg19_1012_Bin_459	3300025156	Marine hydrothermal vent microbial communities from Guaymas Basin, Gulf of California to study Microbial Dark Matter (Phase II) - Marker 14 Mat core 4569-2 3-6 cm metaG (SPAdes) (*) (MER-FS) (assembled)	Aquatic	Hydrothermal vents	Marine	marine hydrothermal sediment	27.0078	-111.407	Hydrothermal Sediment
AABM5-125-24	GCA_005223185	3300021486	Hydrothermal vent microbial mat bacterial communities from Southern Trench, Guaymas Basin, Mexico - 4872-13-4-5_MG (*) (MER-FS) (assembled)	Aquatic	Hydrothermal vents	Marine	Cathedral Hill gradient site, white microbial mat	27.0114	-110.596	Hydrothermal Vent
AABM5-125-24	GCA_005223185	3300033489	Soil microbial communities from uranium-contaminated site in the Upper Colorado River Basin, Wyoming, United States - RVT95D214 (*) (MER-FS) (assembled)	Terrestrial	Unclassified	Soil	uranium-contaminated site	42.9888	-108.399	Terrestrial
AABM5-125-24	Meg19_1012_Bin_459	3300007352	Deep subsurface aquifer microbial community from Lead, South Dakota (DUSEL-D aquifer) (*) (MER-FS) (assembled)	Terrestrial	Aquifer	Deep subsurface	deep subsurface aquifer	44.0342	-103.766	Terrestrial
AABM5-125-24	Meg19_1012_Bin_459	3300006224	Freshwater wetland microbial communities from Ohio, USA, analyzing the effect of biotic and abiotic controls - Mud 3 Core 4 Depth 4 metaG (*) (MER-FS) (assembled)	Aquatic	Wetlands	Freshwater	freshwater wetlands	41.384	-82.513	Wetland
GB-CP11	Meg22_46_Bin_213	3300017987	Hypersaline lake sediment archaeal communities from the Salton Sea, California, USA - SS_1_MS_1 metaG (*) (MER-FS) (assembled)	Aquatic	Hypersaline	Non-marine Saline and Alkaline	anoxic, hypersaline lake sediments of the Salton Sea	33.4166	-115.917	Hypersaline Sediment
GB-CP11	Meg22_46_Bin_213	3300009150	Deep subsurface microbial communities from South Atlantic Ocean to uncover new lineages of life (NeLLi) - Benguela_00093 metaG (*) (MER-FS) (assembled)	Aquatic	Oceanic	Marine	Marine sediment (0.93 mbsf) from M76/1 core 12805-1	-27.74	14.251	Marine Sediment
GB-CP11	Meg22_46_Bin_213	3300009034	Intertidal mud flat sediment archaeal communities from Garolim Bay, Chungcheongnam-do, Korea (*) (MER-FS) (assembled)	Aquatic	Intertidal zone	Marine	Intertidal mud flat sediment	36.88	126.38	Marine Sediment
GB-CP11	Meg22_46_Bin_213	3300009529	Deep subsurface microbial communities from Black Sea to uncover new lineages of life (NeLLi) - Black_00105 metaG (*) (MER-FS) (assembled)	Aquatic	Oceanic	Marine	Marine sediment (1.05 mbsf) from M72/2 site 313	44.288	34.983	Marine Sediment
GB-CP11	Meg22_46_Bin_213	3300009105	Marine water column microbial communities of the permanently stratified Cariaco Basin, Venezuela, November cruise - 900m, 2.7-0.2um, replicate a (*) (MER-FS) (assembled)	Aquatic	Coastal	Marine	Cariaco Basin, Venezuela	10.5	-64.66	Seawater
GB-CP11	Meg22_46_Bin_213	3300027865	Seawater microbial communities from Jervis Inlet, British Columbia, Canada - JV7_2_21 (*) (MER-FS) (assembled)	Aquatic	Inlet	Marine	inlet water	50.0529	-123.821	Seawater
GB-CP12	M3-44_Bin_119	3300001270	Macroalgal surface ecosystem from Botany Bay, Sydney, Australia - BBAY91 (*) (MER-FS) (assembled)	Algae	Ectosymbionts	Green algae	Botany Bay, Sydney, NSW, Australia	-33.9666	151.167	Symbiotic
GB-CP12	M3-44_Bin_119	3300004341	Sediment microbial communities from the mangroves in Sao Paulo State, Brazil - MgvRC1B (*) (MER-FS) (assembled)	Terrestrial	Unclassified	Soil	Sao Paulo State, Brazil	-23.8553	-46.1394	Wetland
GB-CP12	M3-44_Bin_119	3300006937	Tropical rainforest soil microbial communities from the Amazon Forest, Brazil, analyzing deforestation - Metatranscriptome F II A01 (Metagenome Metatranscriptome) (version 2) (*) (MER-FS) (assembled)	Terrestrial	Unclassified	Soil	Amazon Forest, Brazil	-10	-62	Terrestrial
GB-CP12	GCA_003820615	3300020074	Freshwater microbial communities from Lake Tanganyika, Tanzania - TA2015017 Mahale Deep Cast 200m (*) (MER-FS) (assembled)	Aquatic	Lake	Freshwater	lake water	-6.1786	29.658	Freshwater
GB-CP12	GCA_003820615	3300020083	Freshwater microbial communities from Lake Tanganyika, Tanzania - TA2015033 Kigoma Deep Cast 300m (*) (MER-FS) (assembled)	Aquatic	Lake	Freshwater	lake water	-4.9054	29.4853	Freshwater
GB-CP12	M3-44_Bin_119	3300018060	Tropical peat soil microbial communities from peatlands in Department of Meta, Colombia - 0216_QUI02_MP05_10_MG (*) (MER-FS) (assembled)	Terrestrial	Wetlands	Soil	Peat soil	3.8381	-73.3194	Terrestrial
GB-CP12	M3-44_Bin_119	3300009102	Deep subsurface microbial communities from Mariana Trench to uncover new lineages of life (NeLLi) - CR04 metaG (*) (MER-FS) (assembled)	Aquatic	Oceanic	Marine	Sediment 0-1 cm, Mariana Trench	12.4764	144.865	Marine Sediment
GB-CP12	M3-44_Bin_119	3300013233	Combined Assembly of Gp0198154, Gp0198156, Gp0198157, Gp0198161 (*) (MER-FS) (assembled)	Aquatic	Hydrothermal vents	Marine	Urashima	12.9167	143.633	Hydrothermal Vent
GB-CP12	M3-44_Bin_119	3300035205	Seawater microbial communities from, Arabian Sea, Indian Ocean - AMALJGI-DNA-11 (*) (MER-FS) (assembled)	Aquatic	Oceanic	Marine	untreated seawater	15.15	64	Seawater
GB-CP12	M3-44_Bin_119	3300010413	Mangrove sediment microbial communities from Mai Po Nature Reserve Marshes in Hong Kong, China - Maipo_9 (*) (MER-FS) (assembled)	Aquatic	Unclassified	Sediment	Sediment with without mangronve tree cover	22	114	Wetland
GB-CP12	M3-44_Bin_119	3300009509	Mangrove sediment microbial communities from Mai Po Nature Reserve Marshes in Hong Kong, China - Maipo_11 (*) (MER-FS) (assembled)	Aquatic	Unclassified	Sediment	Mai Po Nature Reserve Marshes in Hong Kong	22.4989	114.046	Wetland
GB-CP12	M3-44_Bin_119	3300009873	Activated sludge microbial diversity in wastewater treatment plant from Taiwan - Wenshan plant (*) (MER-FS) (assembled)	Wastewater	Unclassified	Activated Sludge	Wen Shan wastewater treatment plant, Tai Zhong, Tai Wan	24	120	Wastewater
GB-CP12	M3-44_Bin_119	3300033004	Soil microbial communities from Loxahatchee National Wildlife Refuge, Florida, United States - Lox_Sample_4.4 (*) (MER-FS) (assembled)	Terrestrial	Wetlands	Soil	soil from sawgrass-dominated area, high amounts of suspected carpenter ants	26.5052	-80.2345	Terrestrial
GB-CP12	M3-44_Bin_119	3300036858	Soil microbial communities from Everglades Agricultural Area, Florida, United States - EAA2017_Dec_plot3_rep3 (*) (MER-FS) (assembled)	Terrestrial	Unclassified	Soil	Everglades agriculture soil	26.6591	-80.6279	Terrestrial
GB-CP12	M3-44_Bin_119	3300035128	Sediment microbial communities from coastal wetland in Texas, United States - D1105M12 (*) (MER-FS) (assembled)	Aquatic	Wetlands	Marine	Mangrove dominant sediment	27.8985	-97.0386	Wetland
GB-CP12	M3-44_Bin_119	3300013134	Beach sand microbial communities from Municipal Pensacola Beach, Florida - OS-S3 (*) (MER-FS) (assembled)	Terrestrial	Sand	Soil	Beach sand	30.3262	-87.1745	Terrestrial
GB-CP12	M3-44_Bin_119	3300017990	Hypersaline lake sediment archaeal communities from the Salton Sea, California, USA - SS_3_S_2 metaG (*) (MER-FS) (assembled)	Aquatic	Hypersaline	Non-marine Saline and Alkaline	anoxic, hypersaline lake sediments of the Salton Sea	33.3	-115.8	Hypersaline Sediment
GB-CP12	M3-44_Bin_119	3300027917	Marine sediment microbial communities from White Oak River estuary, North Carolina - WOR-2-8_12 (SPAdes) (*) (MER-FS) (assembled)	Aquatic	Oceanic	Marine	White Oak River estuary, North Carolina, USA	34.6402	-77.1094	Marine Sediment
GB-CP12	M3-44_Bin_119	3300009100	Populus root and rhizosphere microbial communities from Tennessee, USA - Soil MetaG P. deltoides SBSDD2 (*) (MER-FS) (assembled)	Plants	Unclassified	Rhizosphere	Bulk soil	35.8443	-83.9607	Plant Associated
GB-CP12	M3-44_Bin_119	3300009156	Populus root and rhizosphere microbial communities from Tennessee, USA - Soil MetaG P. TD hybrid SBSTD1 (version 2) (*) (MER-FS) (assembled)	Plants	Unclassified	Rhizosphere	Bulk soil	35.8444	-83.9599	Plant Associated
GB-CP12	M3-44_Bin_119	3300037479	Hot spring water microbial communities from California, United States - UTS_S1 (*) (MER-FS) (assembled)	Aquatic	Unclassified	Thermal springs	Freshwater carbonate spring	36.4428	-116.828	Freshwater
GB-CP12	M3-44_Bin_119	3300037489	Marine sediment microbial communities off the coast of San Francisco, CA, United States - OC_500m_C5_0cm2cm (*) (MER-FS) (assembled)	Aquatic	Oceanic	Marine	untreated marine sediment	37.0366	-121.299	Marine Sediment
GB-CP12	M3-44_Bin_119	3300037422	Hot spring water microbial communities from California, United States - WSA_S4 (*) (MER-FS) (assembled)	Aquatic	Unclassified	Thermal springs	Freshwater carbonate spring	37.2656	-118.271	Freshwater
GB-CP12	M3-44_Bin_119	3300026144	Soil microbial communities from South San Francisco under conditions of wetland restoration - Salt Pond MetaG R2A_A_D2_MG (SPAdes) (*) (MER-FS) (assembled)	Terrestrial	Wetlands	Soil	Site R2A soil	37.4962	-122.133	Wetland
GB-CP12	M3-44_Bin_119	3300025814	Wetland microbial communities from San Francisco Bay, California, USA, that impact long-term carbon sequestration - Muzzi_PWC_D1 (SPAdes) (*) (MER-FS) (assembled)	Aquatic	Wetlands	Marine	Wetland	37.9264	-122.509	Wetland
GB-CP12	M3-44_Bin_119	3300004463	Combined assembly of Arabidopsis thaliana microbial communities (*) (MER-FS) (assembled)	Plants	Rhizosphere	Roots	Arabidopsis thaliana rhizosphere	37.9314	-122.022	Plant Associated
GB-CP12	M3-44_Bin_119	3300022209	Sediment microbial communities from San Francisco Bay, California, United States - SF_Jul11_sed_USGS_13 (*) (MER-FS) (assembled)	Aquatic	Sediment	Marine	bay sediment	38.03	-122.37	Marine Sediment
GB-CP12	M3-44_Bin_119	3300004022	Wetland microbial communities from the San Francisco Bay, California, USA, that impact long-term carbon sequestration - Browns_ThreeSqA_D1 (*) (MER-FS) (assembled)	Aquatic	Wetlands	Marine	Wetland	38.0457	-121.867	Wetland
GB-CP12	M3-44_Bin_119	3300025951	Wetland microbial communities from San Francisco Bay, California, USA, that impact long-term carbon sequestration - RushMan_ThreeSqA_D2 (SPAdes) (*) (MER-FS) (assembled)	Aquatic	Wetlands	Marine	Wetland	38.2098	-122.033	Wetland
GB-CP12	M3-44_Bin_119	3300009515	Microbial community of beach aquifer sediment core from Cape Shores, Lewes, Delaware, USA - CF-2 (*) (MER-FS) (assembled)	Aquatic	Unclassified	Sediment	beach aquifer sediment core	38.7855	-75.1045	Terrestrial
GB-CP12	M3-44_Bin_119	3300006372	Aqueous microbial communities from the Delaware River and Bay under freshwater to marine salinity gradient to study organic matter cycling in a time-series - DEBay_Spr_0.19_>0.8_RNA1 (Metagenome Metatranscriptome) (*) (MER-FS) (assembled)	Aquatic	Coastal	Marine	Water sample from Delaware River and Bay	39.283	-75.3633	Seawater
GB-CP12	M3-44_Bin_119	3300010392	Coastal sediment microbial communities from Rhode Island, USA. Combined Assembly of Gp0121717, Gp0123912, Gp0123935, Gp0139423, Gp0139424, Gp0139388, Gp0139387, Gp0139386, Gp0139385 (*) (MER-FS) (assembled)	Aquatic	Coastal	Marine	Coastal sediment	40.435	-70.483	Coastal Sediment
GB-CP12	M3-44_Bin_119	3300033433	Lab enriched peat soil microbial communities from Michigan Hollow, Ithaca, NY, United States - MHF15MN (*) (MER-FS) (assembled)	Terrestrial	Unclassified	Peat	Mierotrophic fen	42.3286	-76.4792	Terrestrial
GB-CP12	M3-44_Bin_119	3300036935	Salt marsh sediment microbial communities from Sand Creek Marshes, Rowley, MA, United States - 8SP15 (*) (MER-FS) (assembled)	Aquatic	Intertidal zone	Marine	untreated salt marsh sediment	42.7489	-70.8243	Salt Marsh Sediment
GB-CP12	M3-44_Bin_119	3300005295	Switchgrass rhizosphere bacterial communities from Rose Lake, Michigan, USA - RL3 (*) (MER-FS) (assembled)	Terrestrial	Unclassified	Soil	Switchgrass rhizosphere	42.7948	-84.3938	Plant Associated
GB-CP12	M3-44_Bin_119	3300037478	Sediment microbial communities fromuranium-contaminated floodplain near Riverton, Wyoming, United States - RVT2_Sep_76_v (*) (MER-FS) (assembled)	Terrestrial	Unclassified	Soil	uranium-contaminated floodplain	42.9886	-108.4	Terrestrial
GB-CP12	M3-44_Bin_119	3300030620	Soil microbial communities from uranium-contaminated site in the Upper Colorado River Basin, Wyoming, United States - RVT147D111 (*) (MER-FS) (assembled)	Terrestrial	Unclassified	Soil	soil from uranium-contaminated site	42.9888	-108.399	Terrestrial
GB-CP12	M3-44_Bin_119	3300004643	Soil microbial communities from Arlington Agricultural Research Station in Wisconsin, USA - Combined assembly of AARS Block 3 (*) (MER-FS) (assembled)	Terrestrial	Unclassified	Soil	Wisconsin, United States	43.2958	-89.3799	Terrestrial
GB-CP12	M3-44_Bin_119	3300032260	Coastal sediment microbial communities from Maine, United States - Merrow Island worm burrow (*) (MER-FS) (assembled)	Aquatic	Coastal	Marine	Iron oxide coated marine worm burrow	43.8826	-69.6616	Coastal Sediment
GB-CP12	GCA_003820615	3300009146	Freshwater sediment microbial communities from Prairie Pothole Lake near Jamestown, North Dakota, USA - PPLs Lake P7 Core (1) Depth 10-12cm March2015 (*) (MER-FS) (assembled)	Aquatic	Sediment	Freshwater	Prairie Pothole Lake Sediments	47.0956	-99.1001	Freshwater Sediment
GB-CP12	M3-44_Bin_119	3300004507	Marine microbial communities from expanding oxygen minimum zones in the Saanich Inlet - ESP_133SG_5_RNA (Metagenome Metatranscriptome) (*) (MER-FS) (assembled)	Aquatic	Intertidal zone	Marine	Saanich Inlet, British Columbia, Canada	48.6	-123.5	Seawater
GB-CP12	M3-44_Bin_119	3300024520	Seawater microbial communities from Jervis Inlet, British Columbia, Canada - JV7_2_1 (*) (MER-FS) (assembled)	Aquatic	Inlet	Marine	inlet water	50.0529	-123.821	Seawater
GB-CP12	LQ108M_Bin_12	3300020109	Freshwater microbial communities from Lake Tanganyika, Tanzania - TA2015016 Mahale Deep Cast 400m (*) (MER-FS) (assembled)	Aquatic	Lake	Freshwater	lake water	-6.1786	29.658	Freshwater
GB-CP12	LQ108M_Bin_12	3300020222	Freshwater microbial communities from Lake Tanganyika, Tanzania - TA2015034 Kigoma Deep Cast 250m (*) (MER-FS) (assembled)	Aquatic	Lake	Freshwater	lake water	-4.9054	29.4853	Freshwater
GB-CP12	LQ108M_Bin_12	3300017989	Hypersaline lake sediment archaeal communities from the Salton Sea, California, USA - SS_1_MS_2 metaG (*) (MER-FS) (assembled)	Aquatic	Hypersaline	Non-marine Saline and Alkaline	anoxic, hypersaline lake sediments of the Salton Sea	33.4166	-115.917	Freshwater Sediment
GB-CP12	LQ108M_Bin_12	3300026327	Grasslands soil microbial communities from the Angelo Coastal Reserve, California, USA - Sample Angelo_132 (SPAdes) (*) (MER-FS) (assembled)	Terrestrial	Unclassified	Soil	grassland soil	39.7392	-123.631	Terrestrial
GB-CP12	LQ108M_Bin_12	3300017987	Hypersaline lake sediment archaeal communities from the Salton Sea, California, USA - SS_1_MS_1 metaG (*) (MER-FS) (assembled)	Aquatic	Hypersaline	Non-marine Saline and Alkaline	anoxic, hypersaline lake sediments of the Salton Sea	33.4166	-115.917	Hypersaline Sediment
GB-CP13	Meg22_24_Bin_129	3300017991	Hypersaline lake sediment archaeal communities from the Salton Sea, California, USA - SS_1_D_2 metaG (*) (MER-FS) (assembled)	Aquatic	Hypersaline	Non-marine Saline and Alkaline	anoxic, hypersaline lake sediments of the Salton Sea	33.4166	-115.917	Hypersaline Sediment
GB-CP13	Meg22_24_Bin_129	3300009135	Marine sediment microbial communities from methane seeps within Hudson Canyon, US Atlantic Margin - Hudson Canyon PC-16 382 cmbsf (*) (MER-FS) (assembled)	Aquatic	Unclassified	Sediment	Marine sediment around a methane seep	39.5434	-72.3998	Marine Sediment
GB-CP13	Meg22_24_Bin_129	3300037124	Sediment microbial communities from coastal wetland in Texas, United States - D0606U12re (*) (MER-FS) (assembled)	Aquatic	Wetlands	Marine	Bare sediment	27.8973	-97.0409	Wetland
GB-CP14	Meg22_46_Bin_45	3300020109	Freshwater microbial communities from Lake Tanganyika, Tanzania - TA2015016 Mahale Deep Cast 400m (*) (MER-FS) (assembled)	Aquatic	Lake	Freshwater	lake water	-6.1786	29.658	Freshwater
GB-CP14	Meg22_46_Bin_45	3300020221	Freshwater microbial communities from Lake Tanganyika, Tanzania - TA2015036 Kigoma Deep Cast 100m (*) (MER-FS) (assembled)	Aquatic	Lake	Freshwater	lake water	-4.9054	29.4853	Freshwater
GB-CP14	Meg22_46_Bin_45	3300024054	Freshwater microbial communities from Lake Towuti, South Sulawesi, Indonesia - Watercolumn_Towuti2014_140_MG (*) (MER-FS) (assembled)	Aquatic	Lake	Freshwater	lake water	-2.7	121.404	Freshwater
GB-CP14	Meg22_46_Bin_45	3300013130	Sediment microbial communities from Lake Kivu, Rwanda - Sediment s2_kivu2a2 (*) (MER-FS) (assembled)	Aquatic	Lake	Freshwater	Lake Kivu sediment site 2	-2.05	29.2062	Freshwater Sediment
GB-CP14	Meg22_46_Bin_45	3300025279	Freshwater microbial communities from Lake Kivu, Western Province, Rwanda to study Microbial Dark Matter (Phase II) - Kivu_220m (SPAdes) (*) (MER-FS) (assembled)	Aquatic	Lake	Freshwater	Anoxic lake water	-2.0288	29.1756	Freshwater
GB-CP14	BHB10-38_Bin_124	3300009372	Combined Assembly of Gp0127938, Gp0127939 (*) (MER-FS) (assembled)	Aquatic	Coastal	Marine	Cariaco Basin, Venezuela	10	-64.66	Seawater
GB-CP14	Meg22_46_Bin_45	3300013111	Marine water column microbial communities of the permanently stratified Cariaco Basin, Venezuela, May cruise - 295m, 250-2.7um, replicate b (*) (MER-FS) (assembled)	Aquatic	Coastal	Marine	Cariaco Basin, Venezuela	10.5	-64.66	Seawater
GB-CP14	BHB10-38_Bin_124	3300001665	barSA (*) (MER-FS) (assembled)	Aquatic	Cold seeps	Marine	Cold seep sediment near Barbados	13.2648	-59.4253	Marine Sediment
GB-CP14	Meg22_46_Bin_45	3300037318	Tidal flats microbial mat communities from the lagoon near Shannah, Oman - Site2_nosalt_MIX_4 (*) (MER-FS) (assembled)	Aquatic	Intertidal zone	Marine	Tidal flats microbial mat	20.7452	58.6625	Salt Marsh Sediment
GB-CP14	BHB10-38_Bin_124	3300014903	Subseafloor sediment microbial communities from Guaymas Basin, Gulf of California, Mexico - Guay12, Core 4567-28, 21-24 cm (*) (MER-FS) (assembled)	Aquatic	Hydrothermal vents	Marine	subseafloor sediment	27.009	-111.408	Hydrothermal Sediment
GB-CP14	Meg22_46_Bin_45	3300005265	Hydrothermal sediment microbial communities from Guaymas Basin, California, USA 4484. Combined assembly of Gp0115313 and Gp0146561 (*) (MER-FS) (assembled)	Aquatic	Unclassified	Marine	Guaymus Basin	27.0131	-111.52	Hydrothermal Sediment
GB-CP14	BHB10-38_Bin_124	3300014913	Subseafloor sediment microbial communities from Guaymas Basin, Gulf of California, Mexico - Guay1, Core 4569-9, 0-3 cm (*) (MER-FS) (assembled)	Aquatic	Hydrothermal vents	Marine	subseafloor sediment	27.0151	-111.38	Hydrothermal Sediment
GB-CP14	Meg22_46_Bin_45	3300009874	Sea floor sediment microbial communities from Gulf of Mexico Methane Seep - MPC1T (*) (MER-FS) (assembled)	Aquatic	Unclassified	Sediment	Sea Floor Sediment	27.4	-93.2	Marine Sediment
GB-CP14	Meg22_46_Bin_45	3300035139	Sediment microbial communities from coastal wetland in Texas, United States - D0608S12 (*) (MER-FS) (assembled)	Aquatic	Wetlands	Marine	Spartina dominant sediment	27.8959	-97.0388	Wetland
GB-CP14	BHB10-38_Bin_124	3300037253	Sediment microbial communities from coastal wetland in Texas, United States - D0817U20re (*) (MER-FS) (assembled)	Aquatic	Wetlands	Marine	Bare sediment	27.8977	-97.039	Wetland
GB-CP14	Meg22_46_Bin_45	3300035129	Sediment microbial communities from coastal wetland in Texas, United States - D1105S12 (*) (MER-FS) (assembled)	Aquatic	Wetlands	Marine	Spartina dominant sediment	27.8985	-97.0387	Wetland
GB-CP14	BHB10-38_Bin_124	3300036712	Rhizosphere microbial communities from salt marsh grasses in Alabama, United States - S_170502SBrCrA (*) (MER-FS) (assembled)	Plants	Unclassified	Rhizosphere	rhizosphere of the salt marsh grasses	30.2619	-88.2383	Plant Associated
GB-CP14	Meg22_46_Bin_45	3300017992	Hypersaline lake sediment archaeal communities from the Salton Sea, California, USA - SS_3_S_1 metaG (*) (MER-FS) (assembled)	Aquatic	Hypersaline	Non-marine Saline and Alkaline	anoxic, hypersaline lake sediments of the Salton Sea	33.3	-115.8	Hypersaline Sediment
GB-CP14	BHB10-38_Bin_124	3300018065	Hypersaline lake sediment archaeal communities from the Salton Sea, California, USA - SS_1_S_2 metaG (*) (MER-FS) (assembled)	Aquatic	Hypersaline	Non-marine Saline and Alkaline	anoxic, hypersaline lake sediments of the Salton Sea	33.4166	-115.917	Hypersaline Sediment
GB-CP14	Meg22_46_Bin_45	3300027858	Oil polluted marine microbial communities from Coal Oil Point, Santa Barbara, California, USA - Sample 2 (SPAdes) (*) (MER-FS) (assembled)	Aquatic	Oil seeps	Marine	Coal Oil Point, Santa Barbara, CA	34.3919	-119.846	Oil Seeps
GB-CP14	BHB10-38_Bin_124	3300027852	Oil polluted marine microbial communities from Coal Oil Point, Santa Barbara, California, USA - Sample 7 (SPAdes) (*) (MER-FS) (assembled)	Aquatic	Oil seeps	Marine	Coal Oil Point, Santa Barbara, CA	34.3922	-119.846	Oil Seeps
GB-CP14	Meg22_46_Bin_45	3300002053	Marine sediment microbial communities from White Oak River estuary, North Carolina - WOR_SMTZ (*) (MER-FS) (assembled)	Aquatic	Intertidal zone	Marine	White Oak River estuary, North Carolina, USA	34.6478	-77.1112	Marine Sediment
GB-CP14	BHB10-38_Bin_124	3300037246	Marine sediment microbial communities off the coast of San Francisco, CA, United States - OC_4000m_C2_20cm25cm (*) (MER-FS) (assembled)	Aquatic	Oceanic	Marine	untreated marine sediment	36.1948	-122.038	Marine Sediment
GB-CP14	SY70-5-8_Bin_20	3300037245	Marine sediment microbial communities off the coast of San Francisco, CA, United States - OC_3500m_C2_20cm25cm (*) (MER-FS) (assembled)	Aquatic	Oceanic	Marine	untreated marine sediment	36.6077	-122.62	Marine Sediment
GB-CP14	Meg22_46_Bin_45	3300037234	Marine sediment microbial communities off the coast of San Francisco, CA, United States - OC_3000m_C5_15cm20cm (*) (MER-FS) (assembled)	Aquatic	Oceanic	Marine	untreated marine sediment	36.799	-121.026	Marine Sediment
GB-CP14	BHB10-38_Bin_124	3300037480	Marine sediment microbial communities off the coast of San Francisco, CA, United States - OC_500m_C5_10cm15cm (*) (MER-FS) (assembled)	Aquatic	Oceanic	Marine	untreated marine sediment	37.0366	-121.299	Marine Sediment
GB-CP14	Meg22_46_Bin_45	3300037540	Marine sediment microbial communities off the coast of San Francisco, CA, United States - OC_100m_C4_20cm25cm (*) (MER-FS) (assembled)	Aquatic	Oceanic	Marine	untreated marine sediment	37.1343	-121.456	Marine Sediment
GB-CP14	BHB10-38_Bin_124	3300026133	Salt pond soil microbial communities from South San Francisco under conditions of wetland restoration - Salt Pond MetaG SF2_B_D1_MG (SPAdes) (*) (MER-FS) (assembled)	Terrestrial	Wetlands	Soil	Pond SF2 soil	37.4972	-122.129	Salt Marsh Sediment
GB-CP14	Meg22_46_Bin_45	3300009494	Marine sediment microbial communities from Chincoteague Deepwater methane seep, US Atlantic Margin - Chincoteague Seep MUC-5 12-14 cmbsf (*) (MER-FS) (assembled)	Aquatic	Cold seeps	Marine	Chincoteague methane seep marine sediment, 12-14 cm below seaflor	37.5409	-74.1021	Marine Sediment
GB-CP14	Meg22_46_Bin_45	3300004078	Wetland microbial communities from the San Francisco Bay, California, USA, that impact long-term carbon sequestration - WestPond_TuleB_D2 (*) (MER-FS) (assembled)	Aquatic	Wetlands	Marine	Wetland	38.1075	-121.65	Wetland
GB-CP14	Meg22_46_Bin_45	3300006373	Aqueous microbial communities from the Delaware River and Bay under freshwater to marine salinity gradient to study organic matter cycling in a time-series - DEBay_Fall_15_>0.8_RNA1 (Metagenome Metatranscriptome) (*) (MER-FS) (assembled)	Aquatic	Coastal	Marine	Water sample from Delaware River and Bay	39.283	-75.3633	Freshwater
GB-CP14	BHB10-38_Bin_124	3300009135	Marine sediment microbial communities from methane seeps within Hudson Canyon, US Atlantic Margin - Hudson Canyon PC-16 382 cmbsf (*) (MER-FS) (assembled)	Aquatic	Unclassified	Sediment	Marine sediment around a methane seep	39.5434	-72.3998	Marine Sediment
GB-CP14	Meg22_46_Bin_45	3300006467	Coastal sediment microbial communities from Rhode Island, USA: Combined Assembly of Gp0121717, Gp0123912, Gp0123935 (*) (MER-FS) (assembled)	Aquatic	Coastal	Marine	Coastal sediment	40.435	-70.483	Coastal Sediment
GB-CP14	BHB10-38_Bin_124	3300033513	Wetland soil microbial communities from Old Woman Creek delta, Ohio, United States - OWC_Aug_M2_C1_D5_C (*) (MER-FS) (assembled)	Terrestrial	Wetlands	Soil	wetland soil	41.3769	-82.5097	Wetland
GB-CP14	Meg22_46_Bin_45	3300028920	Marine sediment archaeal communities from Little Sippewissett salt marsh, Falmouth, MA, United States - SSM-Prop-6N (*) (MER-FS) (assembled)	Aquatic	Wetlands	Marine	tidal mud pond sediment	41.5758	-70.6394	Salt Marsh Sediment
GB-CP14	Meg22_46_Bin_45	3300027900	Freshwater lake sediment microbial communities from the University of Notre Dame, USA, for methane emissions studies - BRP12 BR (SPAdes) (*) (MER-FS) (assembled)	Aquatic	Lentic	Freshwater	University of Notre Dame, Indiana, USA	41.7	-86.23	Freshwater Sediment
GB-CP14	BHB10-38_Bin_124	3300031371	Salt marsh sediment microbial communities from the Plum Island Ecosystem LTER, Massachusetts, United States - WE1603-10 (*) (MER-FS) (assembled)	Aquatic	Intertidal zone	Marine	Salt marsh sediment	42.759	-70.891	Salt Marsh Sediment
GB-CP14	Meg22_46_Bin_45	3300032156	Sediment microbial communities from Yellowstone Lake, YNP, Wyoming, USA - YL17G14_0 (*) (MER-FS) (assembled)	Aquatic	Lake	Freshwater	Lake sediments	44.5367	-110.425	Freshwater Sediment
GB-CP14	Meg22_46_Bin_45	3300027726	Freshwater sediment microbial communities from Prairie Pothole Lake near Jamestown, North Dakota, USA - PPLs Lake P8 Core (3) Depth 1-3cm March2015 (SPAdes) (*) (MER-FS) (assembled)	Aquatic	Sediment	Freshwater	Prairie Pothole Lake Sediments	47.0991	-99.1044	Freshwater Sediment
GB-CP14	Meg22_46_Bin_45	3300037339	Sediment microbial communities from Lake Zug, Canton of Zug, Switzerland - LZug_38 (*) (MER-FS) (assembled)	Aquatic	Lake	Freshwater	sediment from eutrophic lake	47.1639	8.4969	Freshwater Sediment
GB-CP14	BHB10-38_Bin_124	3300022938	Seawater microbial communities from Saanich Inlet, British Columbia, Canada - Na_oxic_13_MG (*) (MER-FS) (assembled)	Aquatic	Inlet	Marine	inlet seawater	48.6569	-123.487	Seawater

## Sheet: ST7
					AABM5-125-24												GB-CP11											GB-CP12							GB-CP13											GB-CP14
Metabolism	Pathway	Gene	KO	Function	Meg22_810_Bin_217	Meg19_1012_Bin_198	GCA_002127415	3300016590	2713897514	Meg22_1416_Bin_86	Meg22_46_Bin_23	Meg19_1012_Bin_459	M3-44_Bin_198	M8-62_Bin_262	GCA_003599535	GCA_005223185	Meg22_46_Bin_11	Meg19_1012_Bin_119	Meg19_46_Bin_239	Meg22_02_Bin_84	Meg19_46_Bin_60	Meg22_24_Bin_124	Meg22_46_Bin_213	M3-38_Bin_215	M8-62_Bin_157	M8-62_Bin_326	SY70-4-11_Bin_40	AB_03_Bin_160	BHB10-2_Bin_362	M3-10_Bin_262	M3-22_Bin_282	M3-44_Bin_119	GCA_003820615	LQ108M_Bin_12	Meg22_46_Bin_210	Meg22_1012_Bin_348	Meg22_1214_Bin_176	Meg22_1214_Bin_137	Meg22_46_Bin_89	Meg22_24_Bin_129	BHB10-38_Bin_186	BHB10-38_Bin_9	M3-30_Bin_374	SY70-4-3_Bin_44	SY70-4-3_Bin_59	Meg19_02_Bin_5	ex4484_8	Meg19_46_Bin_228	Meg22_46_Bin_45
Sulfur Cycle databases modified from De Anda et al., 2017	Sulfite oxidation/ sulfate reduction (1,5,11)	aprA	K00394	adenylylsulfate reductase, subunit A [EC:1.8.99.2]	Meg22_810_Bin_217_scaffold_36612_4	Meg19_1012_Bin_198_scaffold_242_18		Ga0186947_scaffold_1002_52		Meg22_1416_Bin_86_scaffold_67758_3		Meg19_1012_Bin_459_scaffold_515_38	M3-44_Bin_198_scaffold_84822_5	M8-62_Bin_262_scaffold_341789_3,M8-62_Bin_262_scaffold_93317_3	GCA_003599535_scaffold_20_24	GCA_005223185_scaffold_18_194							Meg22_46_Bin_213_scaffold_10951_12
		aprB	K00395	adenylylsulfate reductase, subunit B [EC:1.8.99.2]	Meg22_810_Bin_217_scaffold_36612_3	Meg19_1012_Bin_198_scaffold_242_17		Ga0186947_scaffold_1002_53		Meg22_1416_Bin_86_scaffold_67758_2		Meg19_1012_Bin_459_scaffold_515_37	M3-44_Bin_198_scaffold_84822_4	M8-62_Bin_262_scaffold_341789_2,M8-62_Bin_262_scaffold_93317_2	GCA_003599535_scaffold_20_25	GCA_005223185_scaffold_18_195						Meg22_24_Bin_124_scaffold_76082_2	Meg22_46_Bin_213_scaffold_121818_9
		APR	K05907	adenylyl-sulfate reductase (glutathione) [EC:1.8.4.9]
		cysN	K00955	cysNC bifunctional enzyme CysN/CysC [EC:2.7.7.4 2.7.1.25]																									BHB10-2_Bin_362_scaffold_116906_1
		sat	K00958	sat, met3 sulfate adenylyltransferase [EC:2.7.7.4]	Meg22_810_Bin_217_scaffold_26733_4,Meg22_810_Bin_217_scaffold_36612_2	Meg19_1012_Bin_198_scaffold_1126_9,Meg19_1012_Bin_198_scaffold_242_16	GCA_002127415_scaffold_45_3	Ga0186947_scaffold_1002_54		Meg22_1416_Bin_86_scaffold_67758_1		Meg19_1012_Bin_459_scaffold_515_36	M3-44_Bin_198_scaffold_520424_2,M3-44_Bin_198_scaffold_84822_3	M8-62_Bin_262_scaffold_93317_1	GCA_003599535_scaffold_20_26	GCA_005223185_scaffold_18_196	Meg22_46_Bin_11_scaffold_84639_4	Meg19_1012_Bin_119_scaffold_37663_5				Meg22_24_Bin_124_scaffold_19989_1	Meg22_46_Bin_213_scaffold_10951_6	M3-38_Bin_215_scaffold_84099_5			SY70-4-11_Bin_40_scaffold_12323_1	AB_03_Bin_160_scaffold_58852_3	BHB10-2_Bin_362_scaffold_192515_1,BHB10-2_Bin_362_scaffold_49976_13		M3-22_Bin_282_scaffold_23258_5		GCA_003820615_scaffold_70_5	LQ108M_Bin_12_scaffold_12_771	Meg22_46_Bin_210_scaffold_42736_4	Meg22_1012_Bin_348_scaffold_60683_5	Meg22_1214_Bin_176_scaffold_9681_14		Meg22_46_Bin_89_scaffold_3045_9	Meg22_24_Bin_129_scaffold_10542_4	BHB10-38_Bin_186_scaffold_96042_3	BHB10-38_Bin_9_scaffold_27517_3	M3-30_Bin_374_scaffold_2550_35	SY70-4-3_Bin_44_scaffold_12003_5	SY70-4-3_Bin_59_scaffold_7993_1
		APA1	K00988	APA1 2 sulfate adenylyltransferase (ADP) / ATP adenylyltransfera se [EC:2.7.7.5 2.7.7.53]
		PAPS	K13811	PAPSS 3'-phosphoadenosine 5'-phosphosulfate synthase [EC:2.7.7.4 2.7.1.25]
		HINT	K22966	HINT4 sulfate adenylyltransferase (ADP) / adenylylsulfatase [EC: 2.7.7.5 3.6.2.1]
		SoeC	K21309	sulfite dehydrogenase (quinone) subunit SoeC
		SoeA	K21307	sulfite dehydrogenase (quinone) subunit SoeA [EC:1.8.5.6]									M3-44_Bin_198_scaffold_122125_4				Meg22_46_Bin_11_scaffold_41817_7															M3-44_Bin_119_scaffold_1082_56
		SoeB	K21308	sulfite dehydrogenase (quinone) subunit SoeB																												M3-44_Bin_119_scaffold_1082_57			Meg22_46_Bin_210_scaffold_44825_6
		SorA	K05301	sulfite dehydrogenase (cytochrome) subunit A [EC:1.8.2.1]
		SorB	K00386	sulfite dehydrogenase (cytochrome) subunit B [EC:1.8.2.1]
		SUOX	K00387	sulfite oxidase [EC:1.8.3.1]
	Sulfate reduction (5) Assimilation pathway	cysJ	K00380	sulfite reductase (NADPH) flavoprotein alpha-component [EC:1.8.1.2]
		cysI	K00381	sulfite reductase (NADPH) hemoprotein beta-component [EC:1.8.1.2]
		cysH	K00390	phosphoadenosine phosphosulfate reductase [EC:1.8.4.8 1.8.4.10]																									BHB10-2_Bin_362_scaffold_256054_1					LQ108M_Bin_12_scaffold_12_222
		sir	K00392	sir sulfite reductase (ferredoxin) [EC:1.8.7.1]																									BHB10-2_Bin_362_scaffold_256054_4					LQ108M_Bin_12_scaffold_12_221
		fsr	K21816	sulfite reductase (coenzyme F420) [EC:1.8.98.3]
		cysC	K00860	adenylylsulfate kinase [EC:2.7.1.25]			GCA_002127415_scaffold_133_15	Ga0186947_scaffold_1019_7		Meg22_1416_Bin_86_scaffold_64208_3		Meg19_1012_Bin_459_scaffold_311_53,Meg19_1012_Bin_459_scaffold_55_50		M8-62_Bin_262_scaffold_65127_2		GCA_005223185_scaffold_7_197													BHB10-2_Bin_362_scaffold_49976_12			M3-44_Bin_119_scaffold_1082_10	GCA_003820615_scaffold_70_3	LQ108M_Bin_12_scaffold_12_769	Meg22_46_Bin_210_scaffold_42736_6	Meg22_1012_Bin_348_scaffold_60683_3	Meg22_1214_Bin_176_scaffold_9681_16		Meg22_46_Bin_89_scaffold_3045_11	Meg22_24_Bin_129_scaffold_10542_6	BHB10-38_Bin_186_scaffold_96042_5	BHB10-38_Bin_9_scaffold_27517_6		SY70-4-3_Bin_44_scaffold_12003_3	SY70-4-3_Bin_59_scaffold_26330_3
		cysN	K00956	cysN sulfate adenylyltransferase subunit 1 [EC:2.7.7.4]																									BHB10-2_Bin_362_scaffold_116906_1
		cysD	K00957	cysD sulfate adenylyltransferase subunit 2 [EC:2.7.7.4]
		cysQ,	K01082	MET22, BPNT1; 3'(2'), 5'-bisphosphate nucleotidase [EC:3.1.3.7]	Meg22_810_Bin_217_scaffold_124789_3	Meg19_1012_Bin_198_scaffold_1026_30		Ga0186947_scaffold_1048_9																				AB_03_Bin_160_scaffold_10694_3	BHB10-2_Bin_362_scaffold_52700_3			M3-44_Bin_119_scaffold_14131_11		LQ108M_Bin_12_scaffold_12_288
		IMPAD1, IMPA3	K15759	Golgi-resident PAP phosphatase [EC:3.1.3.7]
		SAL	K15422	3'(2'), 5'-bisphosphate nucleotidase / inositol polyphosphate 1-phosphatase [EC:3.1.3.7 3.1.3.57]		Meg19_1012_Bin_198_scaffold_1026_30		Ga0186947_scaffold_1048_9																				AB_03_Bin_160_scaffold_10694_3						LQ108M_Bin_12_scaffold_12_288
		nrnA	K06881	bifunctional oligoribonuclease and PAP phosphatase NrnA [EC:3.1.3.7 3.1.13.3]	Meg22_810_Bin_217_scaffold_27878_9	Meg19_1012_Bin_198_scaffold_8275_7	GCA_002127415_scaffold_88_13		Ga0170695_scaffold_1045_9		Meg22_46_Bin_23_scaffold_28785_1	Meg19_1012_Bin_459_scaffold_3390_25	M3-44_Bin_198_scaffold_98187_1	M8-62_Bin_262_scaffold_70069_6	GCA_003599535_scaffold_33_19	GCA_005223185_scaffold_12_247	Meg22_46_Bin_11_scaffold_45048_3	Meg19_1012_Bin_119_scaffold_12820_5			Meg19_46_Bin_60_scaffold_66941_3	Meg22_24_Bin_124_scaffold_59657_10	Meg22_46_Bin_213_scaffold_8692_8	M3-38_Bin_215_scaffold_118951_5		M8-62_Bin_326_scaffold_418462_4	SY70-4-11_Bin_40_scaffold_9360_4	AB_03_Bin_160_scaffold_2581_9	BHB10-2_Bin_362_scaffold_145875_1	M3-10_Bin_262_scaffold_8201_8	M3-22_Bin_282_scaffold_4247_10	M3-44_Bin_119_scaffold_17317_6		LQ108M_Bin_12_scaffold_17_170	Meg22_46_Bin_210_scaffold_80707_4		Meg22_1214_Bin_176_scaffold_31637_2		Meg22_46_Bin_89_scaffold_7136_13	Meg22_24_Bin_129_scaffold_1385_14	BHB10-38_Bin_186_scaffold_264180_4	BHB10-38_Bin_9_scaffold_26408_7	M3-30_Bin_374_scaffold_410_44		SY70-4-3_Bin_59_scaffold_78335_3	Meg19_02_Bin_5_scaffold_312030_1	ex4484_8_scaffold_381_16	Meg19_46_Bin_228_scaffold_211362_2	Meg22_46_Bin_45_scaffold_104485_1
		cysA	K02045	sulfate/thiosulfate transport system ATP-binding protein [EC:7.3.2.3]											GCA_003599535_scaffold_21_25
		cysU	K02046	sulfate/thiosulfate transport system permease protein											GCA_003599535_scaffold_21_23																		GCA_003820615_scaffold_194_1									BHB10-38_Bin_9_scaffold_87001_4
		cysW	K02047	cysW sulfate/thiosulfate transport system permease protein											GCA_003599535_scaffold_21_24
		cysP	K02048	cysP sulfate/thiosulfate transport system substrate-binding protein
		sbp	K23163	sulfate/thiosulfate transport system substrate-binding protein											GCA_003599535_scaffold_21_22																		GCA_003820615_scaffold_194_2
	Sulfide oxidation (11)	tusD	K07235	tusD, dsrE tRNA 2-thiouridine synthesizing protein D [EC:2.8.1.- ]
		tusC,	K07236	dsrF; tRNA 2-thiouridine synthesizing protein C
		pufA	K08926	pufA light-harvesting complex 1 alpha chain
		pufB	K08927	pufB light-harvesting complex 1 beta chain
		pufL	K08928	photosynthetic reaction center L subunit
		pufM	K08929	pufM photosynthetic reaction center M subunit
		puhA	K13991	photosynthetic reaction center H subunit
		pufX	K13994	photosynthetic reaction center PufX protein
		sqr	K17218	sulfide:quinone oxidoreductase [EC:1.8.5.4]														Meg19_1012_Bin_119_scaffold_13919_7		Meg22_02_Bin_84_scaffold_16892_7	Meg19_46_Bin_60_scaffold_14914_5	Meg22_24_Bin_124_scaffold_34495_1	Meg22_46_Bin_213_scaffold_13332_1	M3-38_Bin_215_scaffold_305454_1							M3-22_Bin_282_scaffold_79051_4			LQ108M_Bin_12_scaffold_329_63							BHB10-38_Bin_186_scaffold_858964_5
		fccB	K17229	sulfide dehydrogenase [flavocytochrome c] flavoprotein chain
		fccA	K17230	cytochrome subunit of sulfide dehydrogenase
		sudA	K20202	sulfide dehydrogenase subunit alpha [EC:1.8.1.19]
		sudB	K20203	sulfide dehydrogenase subunit beta [EC:1.8.1.19]
	Cysteate degradation (12)	suyB	K16846	(2R)-sulfolactate sulfo-lyase subunit beta [EC:4.4.1.24]
		suyA	K16845	(2R)-sulfolactate sulfo-lyase subunit alpha [EC:4.4.1.24]
	DimethylSulfone degradation (13)	sauS	K15515	sulfoacetaldehyde dehydrogenase [EC:1.2.1.81]
		dmoA	K16967	dimethyl-sulfide monooxygenase [EC:1.14.13.131]
	Sulfolactate degradation (15)	comC	K05884	L-2-hydroxycarboxylate dehydrogenase (NAD+) [EC:1.1.1.337]
		comD	K06034	sulfopyruvate decarboxylase subunit alpha [EC:4.1.1.79]
		domDE	K24393	sulfopyruvate decarboxylase [EC:4.1.1.79]
		SPP1,	K06250	BNSP, OPN; secreted phosphoprotein 1
		comE	K13039	sulfopyruvate decarboxylase subunit beta [EC:4.1.1.79]
		pta	K13788	pta phosphate acetyltransferase [EC:2.3.1.8]	Meg22_810_Bin_217_scaffold_51275_6	Meg19_1012_Bin_198_scaffold_37934_4	GCA_002127415_scaffold_41_8		Ga0170695_scaffold_1016_22	Meg22_1416_Bin_86_scaffold_80751_2			M3-44_Bin_198_scaffold_96221_2																																				Meg22_46_Bin_45_scaffold_275849_2
		slcC	K16843	(S)-sulfolactate dehydrogenase [EC:1.1.1.310]
		comC	K16844	(2R)-3-sulfolactate dehydrogenase (NADP+) [EC:1.1.1.338]
		cuyA	K17950	L-cysteate sulfo-lyase [EC:4.4.1.25]														Meg19_1012_Bin_119_scaffold_12417_10
	DMS degradation (16)	ssuD	K04091	alkanesulfonate monooxygenase [EC:1.14.14.5]
		ddhA	K16964	dimethylsulfide dehydrogenase subunit alpha [EC:1.8.2.4]
		ddhB	K16965	dimethylsulfide dehydrogenase subunit beta
		ddhC	K16966	dimethylsulfide dehydrogenase subunit gamma
		sfnG	K17228	dimethylsulfone monooxygenase [EC:1.14.14.35]
	DMSP degradation (17)	dddL	K16953	dddL dimethylpropiothetin dethiomethylase [EC:4.4.1.3]
		dmdA	K17486	dimethylsulfoniopropionate demethylase [EC:2.1.1.269]
		dmdB	K20034	3-(methylthio)propionyl---CoA ligase [EC:6.2.1.44]
		dmdC	K20035	3-(methylthio)propanoyl-CoA dehydrogenase [EC:1.3.8.-]
		dmdD	K20036	(methylthio)acryloyl-CoA hydratase [EC:4.2.1.155]
	Sulfoacetaldehyde degradation (19)	isfD	K15373	sulfoacetaldehyde reductase [EC:1.1.1.313]
		safD	K19699	sulfoacetaldehyde dehydrogenase [EC:1.2.1.73]
		xsc	K03852	sulfoacetaldehyde acetyltransferase [EC:2.3.3.15]
	Thiosulfate oxidation (2)	doxA	K16936	thiosulfate dehydrogenase (quinone) small subunit [EC:1.8.5.2]
		doxD	K16937	thiosulfate dehydrogenase (quinone) large subunit [EC:1.8.5.2]													Meg22_46_Bin_11_scaffold_90090_3	Meg19_1012_Bin_119_scaffold_14923_2		Meg22_02_Bin_84_scaffold_63392_3	Meg19_46_Bin_60_scaffold_266656_3				M8-62_Bin_157_scaffold_313379_2	M8-62_Bin_326_scaffold_186256_2	SY70-4-11_Bin_40_scaffold_47719_2
		doxDA	K05908	thiosulfate dehydrogenase (quinone) [EC:1.8.5.2]
		soxA	K17222	L-cysteine S-thiosulfotransferase [EC:2.8.5.2]
		soxX	K17223	soxX L-cysteine S-thiosulfotransferase [EC:2.8.5.2]
		soxB	K17224	S-sulfosulfanyl-L-cysteine sulfohydrolase [EC:3.1.6.20]																																Meg22_1012_Bin_348_scaffold_107735_5	Meg22_1214_Bin_176_scaffold_10828_6
		soxY	K17226	soxY sulfur-oxidizing protein SoxY
		soxZ	K17227	soxZ sulfur-oxidizing protein SoxZ
		soxC	K17225	sulfane dehydrogenase subunit SoxC
		tsdA	K19713	thiosulfate dehydrogenase [EC:1.8.2.2]
		soxD	K22622	S-disulfanyl-L-cysteine oxidoreductase SoxD [EC:1.8.2.6]
	Elemental sulfur disproportionation (20)	sor	K16952	sulfur oxygenase/reductase [EC:1.13.11.55]
		ETHE1	K17725	sulfur dioxygenase [EC:1.13.11.18]
	Taurine degradation (22)	tmoC,	K15762	tbuB, touC; toluene monooxygenase system ferredoxin
		tmoF,	K15765	tbuC, touF; toluene monooxygenase electron transfer
		msmA	K16968	methanesulfonate monooxygenase subunit alpha [EC:1.14.13.111]
		msmB	K16969	methanesulfonate monooxygenase subunit beta [EC:1.14.13.111]
	23_DS_M_Dimethyl sulfide_O_C	tauD	K03119	taurine dioxygenase [EC:1.14.11.17]
		tpa	K03851	tpa taurine-pyruvate aminotransferase [EC:2.6.1.77]
		toa	K15372	toa taurine---2-oxoglutarate transaminase [EC:2.6.1.55]																																			Meg22_46_Bin_89_scaffold_226011_2,Meg22_46_Bin_89_scaffold_82267_1	Meg22_24_Bin_129_scaffold_52482_2			M3-30_Bin_374_scaffold_1506_35
		tauA	K15551	tauA taurine transport system substrate-binding protein
		tauB	K10831	tauB taurine transport system ATP-binding protein [EC:7.6.2.7]
		tauC	K15552	tauC taurine transport system permease protein
		tauX	K07255	taurine dehydrogenase small subunit [EC:1.4.2.-]
		tauY	K07256	taurine dehydrogenase large subunit [EC:1.4.2.-]
	Methanogenesis from DMS (23)	mtsA	K16954	mtsA methylthiol:coenzyme M methyltransferase [EC:2.1.1.251]
		mtsB	K16955	methylated-thiol--corrinoid protein
	Sulfolipid biosynthesis (27)	gabD	K00135	gabD succinate-semialdehyde dehydrogenase / glutarate-semialdehy de dehydrogenase [EC:1.2.1.16 1.2.1.79 1.2.1.20]														Meg19_1012_Bin_119_scaffold_71216_3							M8-62_Bin_157_scaffold_7773_12	M8-62_Bin_326_scaffold_195765_2	SY70-4-11_Bin_40_scaffold_10864_6,SY70-4-11_Bin_40_scaffold_40296_3
	Tetrathionate reduction (4)	phsA	K08352	psrA thiosulfate reductase / polysulfide reductase chain A [EC:1.8.5.5]										M8-62_Bin_262_scaffold_5560_19		GCA_005223185_scaffold_9_124														M3-10_Bin_262_scaffold_16941_8	M3-22_Bin_282_scaffold_7533_20	M3-44_Bin_119_scaffold_12155_5											M3-30_Bin_374_scaffold_2027_29
		phsB	K08353	phsB thiosulfate reductase electron transport protein
		phsC	K08354	phsC thiosulfate reductase cytochrome b subunit		Meg19_1012_Bin_198_scaffold_5227_14					Meg22_46_Bin_23_scaffold_36622_6	Meg19_1012_Bin_459_scaffold_284_64																													BHB10-38_Bin_186_scaffold_425628_2
		ttrA	K08357	ttrA tetrathionate reductase subunit A
		ttrB	K08358	ttrB tetrathionate reductase subunit B									M3-44_Bin_198_scaffold_122125_3,M3-44_Bin_198_scaffold_664635_4,M3-44_Bin_198_scaffold_131070_3	M8-62_Bin_262_scaffold_213599_3											M8-62_Bin_157_scaffold_37625_2	M8-62_Bin_326_scaffold_248791_3			BHB10-2_Bin_362_scaffold_41844_10	M3-10_Bin_262_scaffold_320330_4	M3-22_Bin_282_scaffold_87601_4	M3-44_Bin_119_scaffold_12155_3											M3-30_Bin_374_scaffold_2027_30
		ttrC	K08359	ttrC tetrathionate reductase subunit C																					M8-62_Bin_157_scaffold_37625_3
		asrA	K16950	asrA anaerobic sulfite reductase subunit A
		asrB	K16951	asrB anaerobic sulfite reductase subunit B																														LQ108M_Bin_12_scaffold_75_136											SY70-4-3_Bin_59_scaffold_13565_6		ex4484_8_scaffold_1111_16
		asrC	K00385	asrC anaerobic sulfite reductase subunit C																																													Meg22_46_Bin_45_scaffold_133637_2
	Sulfur (sulfate and dimethyl sulfoxide) reduction (10) Dissimilatory pathway	dmsB	K00184	dmsB dimethyl sulfoxide reductase iron-sulfur subunit																									BHB10-2_Bin_362_scaffold_41844_14		M3-22_Bin_282_scaffold_47918_7
		dmsC	K00185	dmsC dimethyl sulfoxide reductase membrane subunit
		dmsA	K07306	dmsA anaerobic dimethyl sulfoxide reductase subunit A [EC:1.8.5.3]																									BHB10-2_Bin_362_scaffold_207414_3
		dmsB	K07307	dmsB anaerobic dimethyl sulfoxide reductase subunit B																Meg22_02_Bin_84_scaffold_229917_2	Meg19_46_Bin_60_scaffold_18984_5	Meg22_24_Bin_124_scaffold_8641_5	Meg22_46_Bin_213_scaffold_38569_18	M3-38_Bin_215_scaffold_127962_3	M8-62_Bin_157_scaffold_116595_1				BHB10-2_Bin_362_scaffold_207414_2					LQ108M_Bin_12_scaffold_75_67
		dmsC	K07308	dmsC anaerobic dimethyl sulfoxide reductase subunit C
		dsrA	K11180	dsrA dissimilatory sulfite reductase alpha subunit [EC:1.8.99.5]		Meg19_1012_Bin_198_scaffold_242_24		Ga0186947_scaffold_1002_46		Meg22_1416_Bin_86_scaffold_158781_2	Meg22_46_Bin_23_scaffold_115068_2	Meg19_1012_Bin_459_scaffold_515_19	M3-44_Bin_198_scaffold_94923_5	M8-62_Bin_262_scaffold_28771_2	GCA_003599535_scaffold_13_6	GCA_005223185_scaffold_18_212		Meg19_1012_Bin_119_scaffold_103157_5		Meg22_02_Bin_84_scaffold_33882_4,Meg22_02_Bin_84_scaffold_36695_1		Meg22_24_Bin_124_scaffold_31288_8	Meg22_46_Bin_213_scaffold_62360_2									M3-44_Bin_119_scaffold_2787_18									BHB10-38_Bin_186_scaffold_416012_1
		dsrB	K11181	dsrB dissimilatory sulfite reductase beta subunit [EC:1.8.99.5]		Meg19_1012_Bin_198_scaffold_242_25		Ga0186947_scaffold_1002_45		Meg22_1416_Bin_86_scaffold_158781_1	Meg22_46_Bin_23_scaffold_115068_3	Meg19_1012_Bin_459_scaffold_515_20	M3-44_Bin_198_scaffold_209197_4	M8-62_Bin_262_scaffold_28771_3	GCA_003599535_scaffold_13_5	GCA_005223185_scaffold_18_211		Meg19_1012_Bin_119_scaffold_13436_27		Meg22_02_Bin_84_scaffold_223719_2,Meg22_02_Bin_84_scaffold_33882_3	Meg19_46_Bin_60_scaffold_70600_4	Meg22_24_Bin_124_scaffold_31288_9										M3-44_Bin_119_scaffold_2787_19									BHB10-38_Bin_186_scaffold_416012_2
		dsrC	K23077	dissimilatory sulfite reductase related protein		Meg19_1012_Bin_198_scaffold_242_29		Ga0186947_scaffold_1002_41			Meg22_46_Bin_23_scaffold_30851_3	Meg19_1012_Bin_459_scaffold_515_24		M8-62_Bin_262_scaffold_28771_7	GCA_003599535_scaffold_13_1	GCA_005223185_scaffold_18_207	Meg22_46_Bin_11_scaffold_270174_2,Meg22_46_Bin_11_scaffold_84639_2	Meg19_1012_Bin_119_scaffold_13919_9,Meg19_1012_Bin_119_scaffold_37663_7		Meg22_02_Bin_84_scaffold_114192_3,Meg22_02_Bin_84_scaffold_16892_5	Meg19_46_Bin_60_scaffold_14914_3	Meg22_24_Bin_124_scaffold_31288_1,Meg22_24_Bin_124_scaffold_34495_3	Meg22_46_Bin_213_scaffold_10951_4,Meg22_46_Bin_213_scaffold_13332_3	M3-38_Bin_215_scaffold_305454_3								M3-44_Bin_119_scaffold_13300_21,M3-44_Bin_119_scaffold_2787_26			Meg22_46_Bin_210_scaffold_34764_5					Meg22_24_Bin_129_scaffold_5615_3	BHB10-38_Bin_186_scaffold_858964_3,BHB10-38_Bin_186_scaffold_71919_7		M3-30_Bin_374_scaffold_1528_39
		tusE, dsrC	K11179	tRNA 2-thiouridine synthesizing protein E [EC:2.8.1.-]		Meg19_1012_Bin_198_scaffold_17665_4		Ga0186947_scaffold_1051_11		Meg22_1416_Bin_86_scaffold_53585_1			M3-44_Bin_198_scaffold_127063_6	M8-62_Bin_262_scaffold_126733_5		GCA_005223185_scaffold_14_102						Meg22_24_Bin_124_scaffold_250563_3	Meg22_46_Bin_213_scaffold_13280_9																		BHB10-38_Bin_186_scaffold_316327_2
		qrcA	K23300	menaquinone reductase, multiheme cytochrome c subunit [EC:1.97.-.-]									M3-44_Bin_198_scaffold_68404_3	M8-62_Bin_262_scaffold_69307_4	GCA_003599535_scaffold_47_4					Meg22_02_Bin_84_scaffold_106395_3		Meg22_24_Bin_124_scaffold_348967_3		M3-38_Bin_215_scaffold_19575_1,M3-38_Bin_215_scaffold_20755_7	M8-62_Bin_157_scaffold_25672_2,M8-62_Bin_157_scaffold_6571_2	M8-62_Bin_326_scaffold_47076_6		AB_03_Bin_160_scaffold_102497_3,AB_03_Bin_160_scaffold_7135_9			M3-22_Bin_282_scaffold_90222_2	M3-44_Bin_119_scaffold_603246_1,M3-44_Bin_119_scaffold_9697_14	GCA_003820615_scaffold_350_2	LQ108M_Bin_12_scaffold_17_99
		qrcC	K23301	menaquinone reductase, iron-sulfur cluster-binding subunit [EC:1.97.-.-]										M8-62_Bin_262_scaffold_69307_2
		qrcB	K23302	menaquinone reductase, molybdopterin-binding-like subunit										M8-62_Bin_262_scaffold_69307_3										M3-38_Bin_215_scaffold_20755_8	M8-62_Bin_157_scaffold_25672_3			AB_03_Bin_160_scaffold_7135_8
		qrcD	K23303	menaquinone reductase, integral membrane subunit
		qmoA	K16885	qmoA quinone-modifying oxidoreductase, subunit QmoA				Ga0186947_scaffold_1002_48			Meg22_46_Bin_23_scaffold_295432_2	Meg19_1012_Bin_459_scaffold_515_33		M8-62_Bin_262_scaffold_31535_3,M8-62_Bin_262_scaffold_85889_3	GCA_003599535_scaffold_20_28	GCA_005223185_scaffold_13_16	Meg22_46_Bin_11_scaffold_162636_2	Meg19_1012_Bin_119_scaffold_37663_2		Meg22_02_Bin_84_scaffold_34456_4	Meg19_46_Bin_60_scaffold_57429_3	Meg22_24_Bin_124_scaffold_19989_4	Meg22_46_Bin_213_scaffold_10951_9									M3-44_Bin_119_scaffold_2787_2
		qmoB	K16886	qmoB quinone-modifying oxidoreductase, subunit QmoB		Meg19_1012_Bin_198_scaffold_242_23		Ga0186947_scaffold_1002_47				Meg19_1012_Bin_459_scaffold_515_34	M3-44_Bin_198_scaffold_131070_7,M3-44_Bin_198_scaffold_84822_2	M8-62_Bin_262_scaffold_31535_2,M8-62_Bin_262_scaffold_85889_2	GCA_003599535_scaffold_20_27	GCA_005223185_scaffold_13_15,GCA_005223185_scaffold_18_197	Meg22_46_Bin_11_scaffold_372613_2,Meg22_46_Bin_11_scaffold_76855_2	Meg19_1012_Bin_119_scaffold_37663_3,Meg19_1012_Bin_119_scaffold_7236_6	Meg19_46_Bin_239_scaffold_219501_1	Meg22_02_Bin_84_scaffold_34456_3	Meg19_46_Bin_60_scaffold_57429_2	Meg22_24_Bin_124_scaffold_19989_3	Meg22_46_Bin_213_scaffold_10951_8,Meg22_46_Bin_213_scaffold_11425_4									M3-44_Bin_119_scaffold_2787_3									BHB10-38_Bin_186_scaffold_429532_3
		qmoC	K16887	qmoC quinone-modifying oxidoreductase, subunit QmoC	Meg22_810_Bin_217_scaffold_36612_7	Meg19_1012_Bin_198_scaffold_242_21		Ga0186947_scaffold_1002_49			Meg22_46_Bin_23_scaffold_177285_1	Meg19_1012_Bin_459_scaffold_515_32	M3-44_Bin_198_scaffold_131070_6,M3-44_Bin_198_scaffold_176379_2,M3-44_Bin_198_scaffold_36008_7	M8-62_Bin_262_scaffold_31535_1,M8-62_Bin_262_scaffold_85889_4	GCA_003599535_scaffold_20_29	GCA_005223185_scaffold_13_14,GCA_005223185_scaffold_18_199	Meg22_46_Bin_11_scaffold_76855_3,Meg22_46_Bin_11_scaffold_84639_5	Meg19_1012_Bin_119_scaffold_37663_4,Meg19_1012_Bin_119_scaffold_7236_5,Meg19_1012_Bin_119_scaffold_97277_5	Meg19_46_Bin_239_scaffold_81045_2	Meg22_02_Bin_84_scaffold_34456_2,Meg22_02_Bin_84_scaffold_42844_3,Meg22_02_Bin_84_scaffold_96358_3	Meg19_46_Bin_60_scaffold_162753_1,Meg19_46_Bin_60_scaffold_57429_1,Meg19_46_Bin_60_scaffold_9467_9	Meg22_24_Bin_124_scaffold_19989_2,Meg22_24_Bin_124_scaffold_23059_3,Meg22_24_Bin_124_scaffold_278970_3	Meg22_46_Bin_213_scaffold_10951_7,Meg22_46_Bin_213_scaffold_11425_3,Meg22_46_Bin_213_scaffold_22136_3				SY70-4-11_Bin_40_scaffold_6076_7					M3-44_Bin_119_scaffold_2787_4									BHB10-38_Bin_186_scaffold_429532_2
	Elemental sulfur reduction (6)	psrB	K16293	psrB polysulfide reductase chain B
		psrC	K16294	psrC polysulfide reductase chain C
		sreA	K17219	sreA sulfur reductase molybdopterin subunit
		sreB	K17220	sreB sulfur reductase FeS subunit
		sreC	K17221	sreC sulfur reductase membrane anchor
		hydA	K17993	hydA sulfhydrogenase subunit alpha [EC:1.12.1.3 1.12.1.5]											GCA_003599535_scaffold_26_30												SY70-4-11_Bin_40_scaffold_68694_3	AB_03_Bin_160_scaffold_25565_5	BHB10-2_Bin_362_scaffold_162860_2				GCA_003820615_scaffold_745_3	LQ108M_Bin_12_scaffold_75_134
		hydD	K17994	hydD sulfhydrogenase subunit delta [EC:1.12.1.3 1.12.1.5]											GCA_003599535_scaffold_26_29												SY70-4-11_Bin_40_scaffold_68694_2	AB_03_Bin_160_scaffold_20407_7					GCA_003820615_scaffold_745_2	LQ108M_Bin_12_scaffold_75_135
		hydG	K17995	hydG sulfhydrogenase subunit gamma (sulfur reductase) [EC:1.12.9 8.4]											GCA_003599535_scaffold_26_28													AB_03_Bin_160_scaffold_20407_6					GCA_003820615_scaffold_239_3	LQ108M_Bin_12_scaffold_75_136	Meg22_46_Bin_210_scaffold_92595_3	Meg22_1012_Bin_348_scaffold_26864_2,Meg22_1012_Bin_348_scaffold_51101_7	Meg22_1214_Bin_176_scaffold_13693_2,Meg22_1214_Bin_176_scaffold_7719_3	Meg22_1214_Bin_137_scaffold_103094_5,Meg22_1214_Bin_137_scaffold_65287_5	Meg22_46_Bin_89_scaffold_139222_5	Meg22_24_Bin_129_scaffold_1760_11		BHB10-38_Bin_9_scaffold_31598_10	M3-30_Bin_374_scaffold_10536_14,M3-30_Bin_374_scaffold_2803_10	SY70-4-3_Bin_44_scaffold_19401_6,SY70-4-3_Bin_44_scaffold_93221_2	SY70-4-3_Bin_59_scaffold_9277_6		ex4484_8_scaffold_1111_16,ex4484_8_scaffold_424_7		Meg22_46_Bin_45_scaffold_30051_2
		hydB	K17996	hydB sulfhydrogenase subunit beta (sulfur reductase) [EC:1.12.98 .4]											GCA_003599535_scaffold_26_27		Meg22_46_Bin_11_scaffold_90283_2										SY70-4-11_Bin_40_scaffold_22990_1	AB_03_Bin_160_scaffold_20407_5	BHB10-2_Bin_362_scaffold_335912_4				GCA_003820615_scaffold_239_2,GCA_003820615_scaffold_812_2	LQ108M_Bin_12_scaffold_75_138		Meg22_1012_Bin_348_scaffold_26864_1	Meg22_1214_Bin_176_scaffold_13693_1,Meg22_1214_Bin_176_scaffold_7719_4	Meg22_1214_Bin_137_scaffold_103094_4,Meg22_1214_Bin_137_scaffold_65287_4	Meg22_46_Bin_89_scaffold_6478_20	Meg22_24_Bin_129_scaffold_109083_1,Meg22_24_Bin_129_scaffold_1760_12	BHB10-38_Bin_186_scaffold_69818_7	BHB10-38_Bin_9_scaffold_248436_2,BHB10-38_Bin_9_scaffold_31598_9,BHB10-38_Bin_9_scaffold_39740_9	M3-30_Bin_374_scaffold_10536_15,M3-30_Bin_374_scaffold_2803_11,M3-30_Bin_374_scaffold_395_29	SY70-4-3_Bin_44_scaffold_88402_1,SY70-4-3_Bin_44_scaffold_93221_1	SY70-4-3_Bin_59_scaffold_13565_7,SY70-4-3_Bin_59_scaffold_9277_7		ex4484_8_scaffold_1111_17,ex4484_8_scaffold_424_6		Meg22_46_Bin_45_scaffold_30051_1
	Thiosulfate disproportionation (7)	TST,	K01011	TST, MPST, sseA thiosulfate/3-mercaptopyruvate sulfurtransferase [EC:2.8.1.1 2.8.1.2]			GCA_002127415_scaffold_131_1			Meg22_1416_Bin_86_scaffold_197096_2																					M3-22_Bin_282_scaffold_16348_3										BHB10-38_Bin_186_scaffold_262681_3				SY70-4-3_Bin_59_scaffold_30365_5
		glpE	K02439	glpE thiosulfate sulfurtransferase [EC:2.8.1.1]
	Carbon disulfide degradation (8)	csh	K20499	csh carbon disulfide hydrolase [EC:3.13.1.5]
	Alkane sulfonate reduction (9)	ssuE	K00299	ssuE FMN reductase [EC:1.5.1.38]																				M3-38_Bin_215_scaffold_465970_2	M8-62_Bin_157_scaffold_31006_3
		ssuA	K15553	ssuA sulfonate transport system substrate-binding protein
		ssuC	K15554	ssuC sulfonate transport system permease protein
		ssuB	K15555	ssuB sulfonate transport system ATP-binding protein [EC:3.6.3.-]
	Sulfolipid biosynthesis (27)	SQD1	K06118	SQD1, sqdB UDP-sulfoquinovose synthase [EC:3.13.1.1]
	Sulfate ester hydorlysis	atsK	K22303	alpha-ketoglutarate-dependent sulfate ester dioxygenase [EC:1.14.11.-]
		ARSE	K18222	arylsulfatase E [EC:3.1.6.-]
		ARSG	K12381	arylsulfatase G [EC:3.1.6.-]
		ARSK	K12376	arylsulfatase K [EC:3.1.6.-]													Meg22_46_Bin_11_scaffold_108081_5						Meg22_46_Bin_213_scaffold_125842_1	M3-38_Bin_215_scaffold_282687_3							M3-22_Bin_282_scaffold_109074_1	M3-44_Bin_119_scaffold_23116_7														Meg19_02_Bin_5_scaffold_16390_7
		ARSI_J	K12375	arylsulfatase I/J [EC:3.1.6.-]
		ARSD_F_H	K12374	arylsulfatase D/F/H [EC:3.1.6.-]																									BHB10-2_Bin_362_scaffold_29102_8										Meg22_46_Bin_89_scaffold_27508_5
		ARSB	K01135	arylsulfatase B [EC:3.1.6.12]																								AB_03_Bin_160_scaffold_91966_3
		ARSA	K01134	arylsulfatase A [EC:3.1.6.8]													Meg22_46_Bin_11_scaffold_362541_2	Meg19_1012_Bin_119_scaffold_219425_2,Meg19_1012_Bin_119_scaffold_54546_1,Meg19_1012_Bin_119_scaffold_2247_28	Meg19_46_Bin_239_scaffold_148959_2	Meg22_02_Bin_84_scaffold_157148_2,Meg22_02_Bin_84_scaffold_52405_3	Meg19_46_Bin_60_scaffold_8558_6,Meg19_46_Bin_60_scaffold_198891_1	Meg22_24_Bin_124_scaffold_9078_5,Meg22_24_Bin_124_scaffold_231215_2,Meg22_24_Bin_124_scaffold_68796_2	Meg22_46_Bin_213_scaffold_9218_2	M3-38_Bin_215_scaffold_453285_2	M8-62_Bin_157_scaffold_13034_4		SY70-4-11_Bin_40_scaffold_38592_4			M3-10_Bin_262_scaffold_126063_1,M3-10_Bin_262_scaffold_338458_2		M3-44_Bin_119_scaffold_10149_28
		E3.1.6.1	K01130	arylsulfatase [EC:3.1.6.1]									M3-44_Bin_198_scaffold_75515_2				Meg22_46_Bin_11_scaffold_148152_3,Meg22_46_Bin_11_scaffold_288503_2,Meg22_46_Bin_11_scaffold_36151_4	Meg19_1012_Bin_119_scaffold_21705_5,Meg19_1012_Bin_119_scaffold_2247_28,Meg19_1012_Bin_119_scaffold_3672_11,Meg19_1012_Bin_119_scaffold_6657_17,Meg19_1012_Bin_119_scaffold_6657_20	Meg19_46_Bin_239_scaffold_148959_2,Meg19_46_Bin_239_scaffold_218128_1,Meg19_46_Bin_239_scaffold_22108_4,Meg19_46_Bin_239_scaffold_69747_1	Meg22_02_Bin_84_scaffold_249768_2,Meg22_02_Bin_84_scaffold_261752_2,Meg22_02_Bin_84_scaffold_28595_6,Meg22_02_Bin_84_scaffold_55527_4	Meg19_46_Bin_60_scaffold_198891_1,Meg19_46_Bin_60_scaffold_23777_7,Meg19_46_Bin_60_scaffold_62784_2,Meg19_46_Bin_60_scaffold_88319_3,Meg19_46_Bin_60_scaffold_95133_3,Meg19_46_Bin_60_scaffold_96073_3	Meg22_24_Bin_124_scaffold_17609_7,Meg22_24_Bin_124_scaffold_231215_2,Meg22_24_Bin_124_scaffold_25513_5,Meg22_24_Bin_124_scaffold_260202_1,Meg22_24_Bin_124_scaffold_333631_3,Meg22_24_Bin_124_scaffold_43818_3,Meg22_24_Bin_124_scaffold_59533_2,Meg22_24_Bin_124_scaffold_68796_2	Meg22_46_Bin_213_scaffold_229639_2,Meg22_46_Bin_213_scaffold_238774_5,Meg22_46_Bin_213_scaffold_25888_4,Meg22_46_Bin_213_scaffold_54446_4,Meg22_46_Bin_213_scaffold_58789_6	M3-38_Bin_215_scaffold_122154_1	M8-62_Bin_157_scaffold_37625_6,M8-62_Bin_157_scaffold_37625_7,M8-62_Bin_157_scaffold_47124_2		SY70-4-11_Bin_40_scaffold_27575_2,SY70-4-11_Bin_40_scaffold_38592_4		BHB10-2_Bin_362_scaffold_86015_4			M3-44_Bin_119_scaffold_3079_18	GCA_003820615_scaffold_390_1	LQ108M_Bin_12_scaffold_288_125		Meg22_1012_Bin_348_scaffold_67933_5	Meg22_1214_Bin_176_scaffold_73495_5			Meg22_24_Bin_129_scaffold_194425_1,Meg22_24_Bin_129_scaffold_399579_3	BHB10-38_Bin_186_scaffold_15589_3	BHB10-38_Bin_9_scaffold_76582_4		SY70-4-3_Bin_44_scaffold_8894_4
		STS	K01131	steryl-sulfatase [EC:3.1.6.2]																	Meg19_46_Bin_60_scaffold_210155_1
		GALNS	K01132	N-acetylgalactosamine-6-sulfatase [EC:3.1.6.4]
		betC	K01133	choline-sulfatase [EC:3.1.6.6]															Meg19_46_Bin_239_scaffold_50903_4									AB_03_Bin_160_scaffold_38403_2,AB_03_Bin_160_scaffold_7398_6,AB_03_Bin_160_scaffold_9554_8	BHB10-2_Bin_362_scaffold_27721_8	M3-10_Bin_262_scaffold_277321_2	M3-22_Bin_282_scaffold_142962_1,M3-22_Bin_282_scaffold_269420_1,M3-22_Bin_282_scaffold_35712_2	M3-44_Bin_119_scaffold_12560_13,M3-44_Bin_119_scaffold_2869_17	GCA_003820615_scaffold_647_2		Meg22_46_Bin_210_scaffold_13128_4		Meg22_1214_Bin_176_scaffold_110814_1		Meg22_46_Bin_89_scaffold_19636_3,Meg22_46_Bin_89_scaffold_2016_4,Meg22_46_Bin_89_scaffold_234516_2	Meg22_24_Bin_129_scaffold_43521_9,Meg22_24_Bin_129_scaffold_74738_3,Meg22_24_Bin_129_scaffold_9191_5	BHB10-38_Bin_186_scaffold_231321_3	BHB10-38_Bin_9_scaffold_241911_5	M3-30_Bin_374_scaffold_381_43				ex4484_8_scaffold_493_2
		IDS	K01136	iduronate 2-sulfatase [EC:3.1.6.13]										M8-62_Bin_262_scaffold_324710_1	GCA_003599535_scaffold_16_4	GCA_005223185_scaffold_12_161												AB_03_Bin_160_scaffold_31394_2		M3-10_Bin_262_scaffold_42424_4	M3-22_Bin_282_scaffold_44633_4			LQ108M_Bin_12_scaffold_12_365,LQ108M_Bin_12_scaffold_359_72,LQ108M_Bin_12_scaffold_444_14,LQ108M_Bin_12_scaffold_89_105	Meg22_46_Bin_210_scaffold_178300_2,Meg22_46_Bin_210_scaffold_76923_2			Meg22_1214_Bin_137_scaffold_24115_7	Meg22_46_Bin_89_scaffold_7421_1,Meg22_46_Bin_89_scaffold_7421_5	Meg22_24_Bin_129_scaffold_15314_2,Meg22_24_Bin_129_scaffold_30431_3	BHB10-38_Bin_186_scaffold_152250_2,BHB10-38_Bin_186_scaffold_3754_19,BHB10-38_Bin_186_scaffold_452465_1	BHB10-38_Bin_9_scaffold_12597_25	M3-30_Bin_374_scaffold_1979_10,M3-30_Bin_374_scaffold_7627_6				ex4484_8_scaffold_790_15		Meg22_46_Bin_45_scaffold_218947_1
		GNS	K01137	N-acetylglucosamine-6-sulfatase [EC:3.1.6.14]
		K01138	K01138	uncharacterized sulfatase [EC:3.1.6.-]									M3-44_Bin_198_scaffold_167955_3				Meg22_46_Bin_11_scaffold_170590_1	Meg19_1012_Bin_119_scaffold_7236_19				Meg22_24_Bin_124_scaffold_19551_6				M8-62_Bin_326_scaffold_77300_4					M3-22_Bin_282_scaffold_175813_2			LQ108M_Bin_12_scaffold_9001_7
		SULF	K14607	extracellular sulfatase Sulf [EC:3.1.6.-]
	Sulfite assimilation	cysO	K10150	cysteine synthase / O-phosphoserine sulfhydrylase / cystathionine beta-synthase [EC:2.5.1.47 2.5.1.65 4.2.1.22]
		cysK	K01738	cysteine synthase A	Meg22_810_Bin_217_scaffold_54001_6	Meg19_1012_Bin_198_scaffold_9220_4	GCA_002127415_scaffold_325_2							M8-62_Bin_262_scaffold_19257_6	GCA_003599535_scaffold_77_16	GCA_005223185_scaffold_17_76		Meg19_1012_Bin_119_scaffold_17953_2		Meg22_02_Bin_84_scaffold_31398_5			Meg22_46_Bin_213_scaffold_9218_4	M3-38_Bin_215_scaffold_380916_3	M8-62_Bin_157_scaffold_9842_18	M8-62_Bin_326_scaffold_175225_2		AB_03_Bin_160_scaffold_48781_2,AB_03_Bin_160_scaffold_9445_3	BHB10-2_Bin_362_scaffold_34929_6,BHB10-2_Bin_362_scaffold_367627_1		M3-22_Bin_282_scaffold_6282_8	M3-44_Bin_119_scaffold_6536_30,M3-44_Bin_119_scaffold_3555_10	GCA_003820615_scaffold_733_1,GCA_003820615_scaffold_274_2	LQ108M_Bin_12_scaffold_12_597	Meg22_46_Bin_210_scaffold_112955_3,Meg22_46_Bin_210_scaffold_49790_3	Meg22_1012_Bin_348_scaffold_20523_7,Meg22_1012_Bin_348_scaffold_33774_2,Meg22_1012_Bin_348_scaffold_34234_5	Meg22_1214_Bin_176_scaffold_77372_2,Meg22_1214_Bin_176_scaffold_206957_3,Meg22_1214_Bin_176_scaffold_22659_5	Meg22_1214_Bin_137_scaffold_55102_3,Meg22_1214_Bin_137_scaffold_37981_5	Meg22_46_Bin_89_scaffold_15068_6,Meg22_46_Bin_89_scaffold_1547_23,Meg22_46_Bin_89_scaffold_23233_3	Meg22_24_Bin_129_scaffold_120744_2,Meg22_24_Bin_129_scaffold_4010_5,Meg22_24_Bin_129_scaffold_21213_6	BHB10-38_Bin_186_scaffold_22486_10,BHB10-38_Bin_186_scaffold_75502_5	BHB10-38_Bin_9_scaffold_107655_3,BHB10-38_Bin_9_scaffold_58845_7	M3-30_Bin_374_scaffold_1506_44,M3-30_Bin_374_scaffold_2497_33,M3-30_Bin_374_scaffold_924_36	SY70-4-3_Bin_44_scaffold_82167_1	SY70-4-3_Bin_59_scaffold_14288_4	Meg19_02_Bin_5_scaffold_135036_2	ex4484_8_scaffold_2641_1,ex4484_8_scaffold_900_14	Meg19_46_Bin_228_scaffold_13026_8,Meg19_46_Bin_228_scaffold_40458_2	Meg22_46_Bin_45_scaffold_129738_2,Meg22_46_Bin_45_scaffold_18915_3,Meg22_46_Bin_45_scaffold_5004_2,Meg22_46_Bin_45_scaffold_139008_3,Meg22_46_Bin_45_scaffold_62026_3
		cysM	K12339	cysteine synthase B																									BHB10-2_Bin_362_scaffold_55934_4	M3-10_Bin_262_scaffold_42473_3	M3-22_Bin_282_scaffold_26755_11			LQ108M_Bin_12_scaffold_17_123								BHB10-38_Bin_9_scaffold_10987_4
		ATCYSC1	K13034	L-3-cyanoalanine synthase/ cysteine synthase [EC:2.5.1.47 4.4.1.9]
		MET17	K17069	O-acetylhomoserine/O-acetylserine sulfhydrylase [EC:2.5.1.49 2.5.1.47]
		cysE	K00640	Serine O-acetyltransferase [EC:2.3.1.30]											GCA_003599535_scaffold_77_15													AB_03_Bin_160_scaffold_55562_2					GCA_003820615_scaffold_274_3		Meg22_46_Bin_210_scaffold_112955_2			Meg22_1214_Bin_137_scaffold_33274_5	Meg22_46_Bin_89_scaffold_20128_8	Meg22_24_Bin_129_scaffold_80603_4	BHB10-38_Bin_186_scaffold_291798_2	BHB10-38_Bin_9_scaffold_36213_2	M3-30_Bin_374_scaffold_4701_13		SY70-4-3_Bin_59_scaffold_77276_1	Meg19_02_Bin_5_scaffold_218533_2	ex4484_8_scaffold_900_13		Meg22_46_Bin_45_scaffold_34187_3
		cysE	K23304	Serine O-acetyltransferase [EC:2.3.1.30]
		mccB	K17217	cystathionine gamma-lyase / homocysteine desulfhydrase [EC:4.4.1.1 4.4.1.2]																					M8-62_Bin_157_scaffold_476380_2
		metB	K01739	cystathionine gamma-synthase [EC:2.5.1.48]																				M3-38_Bin_215_scaffold_180648_2	M8-62_Bin_157_scaffold_327419_1,M8-62_Bin_157_scaffold_106647_2		SY70-4-11_Bin_40_scaffold_18062_1				M3-22_Bin_282_scaffold_6282_9	M3-44_Bin_119_scaffold_3555_9		LQ108M_Bin_12_scaffold_17_218															Meg22_46_Bin_45_scaffold_139008_2,Meg22_46_Bin_45_scaffold_150504_2
		metZ	K10764	O-succinylhomoserine sulfhydrylase [EC:2.5.1.-]													Meg22_46_Bin_11_scaffold_61817_2	Meg19_1012_Bin_119_scaffold_11901_9	Meg19_46_Bin_239_scaffold_38641_5	Meg22_02_Bin_84_scaffold_3295_7	Meg19_46_Bin_60_scaffold_10159_5	Meg22_24_Bin_124_scaffold_8840_6	Meg22_46_Bin_213_scaffold_51709_6	M3-38_Bin_215_scaffold_166415_1		M8-62_Bin_326_scaffold_112188_2
		metA	K00651	homoserine O-succinyltransferase/O-acetyltransferase [EC:2.3.1.46 2.3.1.31]																																												Meg19_46_Bin_228_scaffold_243204_3
		metX	K00641	homoserine O-acetyltransferase/O-succinyltransferase [EC:2.3.1.31 2.3.1.46]																					M8-62_Bin_157_scaffold_327419_2								GCA_003820615_scaffold_434_2		Meg22_46_Bin_210_scaffold_54497_3
	Sulfate transporter	TC.SULP	K03321	sulfate permease, SulP family	Meg22_810_Bin_217_scaffold_57503_3	Meg19_1012_Bin_198_scaffold_5382_14		Ga0186947_scaffold_1095_2		Meg22_1416_Bin_86_scaffold_86620_3		Meg19_1012_Bin_459_scaffold_3881_15		M8-62_Bin_262_scaffold_68136_3	GCA_003599535_scaffold_20_15	GCA_005223185_scaffold_6_79																M3-44_Bin_119_scaffold_1082_44								Meg22_24_Bin_129_scaffold_399579_1				SY70-4-3_Bin_44_scaffold_57988_1
		ylnA, cysP	K16331	sulfate permease
	Methionine sulfoxide reduction	msrP	K07147	methionine sulfoxide reductase catalytic subunit [EC:1.8.-.-]																					M8-62_Bin_157_scaffold_18940_7	M8-62_Bin_326_scaffold_49161_2			BHB10-2_Bin_362_scaffold_18887_9	M3-10_Bin_262_scaffold_106325_2										Meg22_24_Bin_129_scaffold_529506_2
		msrQ	K17247	methionine sulfoxide reductase heme-binding subunit																					M8-62_Bin_157_scaffold_18940_6	M8-62_Bin_326_scaffold_49161_1				M3-10_Bin_262_scaffold_106325_3
		msrA	K07304	peptide-methionine (S)-S-oxide reductase [EC:1.8.4.11]								Meg19_1012_Bin_459_scaffold_369_80		M8-62_Bin_262_scaffold_112742_4,M8-62_Bin_262_scaffold_427458_1	GCA_003599535_scaffold_20_2	GCA_005223185_scaffold_9_130		Meg19_1012_Bin_119_scaffold_57402_5	Meg19_46_Bin_239_scaffold_66781_4		Meg19_46_Bin_60_scaffold_176522_1	Meg22_24_Bin_124_scaffold_203594_1	Meg22_46_Bin_213_scaffold_367691_1	M3-38_Bin_215_scaffold_204629_2	M8-62_Bin_157_scaffold_66243_6	M8-62_Bin_326_scaffold_84045_2	SY70-4-11_Bin_40_scaffold_35805_2		BHB10-2_Bin_362_scaffold_65237_4	M3-10_Bin_262_scaffold_289383_1,M3-10_Bin_262_scaffold_38840_6	M3-22_Bin_282_scaffold_122462_2,M3-22_Bin_282_scaffold_85542_2	M3-44_Bin_119_scaffold_16358_7	GCA_003820615_scaffold_45_2	LQ108M_Bin_12_scaffold_840_28	Meg22_46_Bin_210_scaffold_21665_3	Meg22_1012_Bin_348_scaffold_27658_5	Meg22_1214_Bin_176_scaffold_10453_6	Meg22_1214_Bin_137_scaffold_10043_8	Meg22_46_Bin_89_scaffold_103408_4	Meg22_24_Bin_129_scaffold_98426_4		BHB10-38_Bin_9_scaffold_54155_3	M3-30_Bin_374_scaffold_2365_6		SY70-4-3_Bin_59_scaffold_2068_2	Meg19_02_Bin_5_scaffold_116725_2,Meg19_02_Bin_5_scaffold_127557_2
		msrB	K07305	peptide-methionine (R)-S-oxide reductase [EC:1.8.4.12]																									BHB10-2_Bin_362_scaffold_65237_4	M3-10_Bin_262_scaffold_289383_1	M3-22_Bin_282_scaffold_85542_2	M3-44_Bin_119_scaffold_16358_7	GCA_003820615_scaffold_77_1	LQ108M_Bin_12_scaffold_840_28				Meg22_1214_Bin_137_scaffold_41810_6	Meg22_46_Bin_89_scaffold_56355_6	Meg22_24_Bin_129_scaffold_29742_6	BHB10-38_Bin_186_scaffold_84305_3	BHB10-38_Bin_9_scaffold_8025_4	M3-30_Bin_374_scaffold_2365_6		SY70-4-3_Bin_59_scaffold_65702_4			Meg19_46_Bin_228_scaffold_11332_6
		msrC	K08968	L-methionine (R)-S-oxide reductase [EC:1.8.4.14]										M8-62_Bin_262_scaffold_17863_4	GCA_003599535_scaffold_6_27	GCA_005223185_scaffold_7_307								M3-38_Bin_215_scaffold_887374_2	M8-62_Bin_157_scaffold_15351_6			AB_03_Bin_160_scaffold_70120_2	BHB10-2_Bin_362_scaffold_32493_2,BHB10-2_Bin_362_scaffold_73018_8	M3-10_Bin_262_scaffold_73629_2	M3-22_Bin_282_scaffold_35267_4,M3-22_Bin_282_scaffold_64459_3	M3-44_Bin_119_scaffold_261861_1		LQ108M_Bin_12_scaffold_17_225	Meg22_46_Bin_210_scaffold_195905_3		Meg22_1214_Bin_176_scaffold_87243_2						M3-30_Bin_374_scaffold_1908_4		SY70-4-3_Bin_59_scaffold_29215_6			Meg19_46_Bin_228_scaffold_13013_6	Meg22_46_Bin_45_scaffold_5480_8
		msrAB	K12267	peptide methionine sulfoxide reductase msrA/msrB [EC:1.8.4.11 1.8.4.12]								Meg19_1012_Bin_459_scaffold_369_80			GCA_003599535_scaffold_20_2	GCA_005223185_scaffold_9_130		Meg19_1012_Bin_119_scaffold_57402_5	Meg19_46_Bin_239_scaffold_66781_4			Meg22_24_Bin_124_scaffold_203594_1							BHB10-2_Bin_362_scaffold_65237_4	M3-10_Bin_262_scaffold_289383_1	M3-22_Bin_282_scaffold_85542_2	M3-44_Bin_119_scaffold_16358_7		LQ108M_Bin_12_scaffold_840_28									M3-30_Bin_374_scaffold_2365_6			Meg19_02_Bin_5_scaffold_116725_2,Meg19_02_Bin_5_scaffold_127557_2
	Methanethiol	SELENBP1	K17285	methanethiol oxidase [EC:1.8.3.4]
		mddA	K21310	methanethiol S-methyltransferase [EC:2.1.1.334]																				M3-38_Bin_215_scaffold_341356_1										LQ108M_Bin_12_scaffold_329_36
Nitrogen Cycle databases modified from Kuypers et al., 2018	Cytoplasmic assimilatory nitrate reduction	nasA	K00372	assimilatory nitrate reductase catalytic subunit [EC:1.7.99.-]
		nasB	K00360	assimilatory nitrate reductase electron transfer subunit [EC:1.7.99.-]
	Membrane-bounded nitrate reductase/nitrite oxidoredutase	narG, narZ, nxrA	K00370	nitrate reductase / nitrite oxidoreductase, alpha subunit [EC:1.7.5.1 1.7.99.4]																				M3-38_Bin_215_scaffold_188265_1,M3-38_Bin_215_scaffold_431200_2	M8-62_Bin_157_scaffold_6571_6			AB_03_Bin_160_scaffold_157075_3,AB_03_Bin_160_scaffold_64627_1				M3-44_Bin_119_scaffold_4891_24																Meg19_46_Bin_228_scaffold_167907_3
		narH, narY, nxrB	K00371	nitrate reductase / nitrite oxidoreductase, beta subunit [EC:1.7.5.1 1.7.99.4]																				M3-38_Bin_215_scaffold_188265_2	M8-62_Bin_157_scaffold_6571_5							M3-44_Bin_119_scaffold_4891_23
		narI, narV	K00374	nitrate reductase gamma subunit [EC:1.7.5.1 1.7.99.4]		Meg19_1012_Bin_198_scaffold_242_31		Ga0186947_scaffold_1002_39		Meg22_1416_Bin_86_scaffold_131503_2	Meg22_46_Bin_23_scaffold_30851_5	Meg19_1012_Bin_459_scaffold_515_26		M8-62_Bin_262_scaffold_28771_9	GCA_003599535_scaffold_20_35	GCA_005223185_scaffold_14_100,GCA_005223185_scaffold_18_205	Meg22_46_Bin_11_scaffold_181825_2				Meg19_46_Bin_60_scaffold_281826_1	Meg22_24_Bin_124_scaffold_31288_3	Meg22_46_Bin_213_scaffold_10951_2		M8-62_Bin_157_scaffold_220216_3,M8-62_Bin_157_scaffold_6571_3							M3-44_Bin_119_scaffold_2787_28
		narJ, narW	K00373	nitrate reductase molybdenum cofactor assembly chaperone NarJ/NarW																				M3-38_Bin_215_scaffold_188265_3	M8-62_Bin_157_scaffold_6571_4
		narB	K00367	ferredoxin-nitrate reductase [EC:1.7.7.2]
	Periplasmic nitrate reductase	napA	K02567	nitrate reductase (cytochrome) [EC:1.9.6.1]												GCA_005223185_scaffold_13_1,GCA_005223185_scaffold_9_140													BHB10-2_Bin_362_scaffold_84679_2	M3-10_Bin_262_scaffold_177386_3	M3-22_Bin_282_scaffold_108079_3	M3-44_Bin_119_scaffold_1127_50		LQ108M_Bin_12_scaffold_140_54,LQ108M_Bin_12_scaffold_17_130
		napB	K02568	nitrate reductase (cytochrome), electron transfer subunit												GCA_005223185_scaffold_13_4,GCA_005223185_scaffold_9_142													BHB10-2_Bin_362_scaffold_84679_3		M3-22_Bin_282_scaffold_108079_2	M3-44_Bin_119_scaffold_1127_49		LQ108M_Bin_12_scaffold_140_55
		NR	K10534	nitrate reductase (NAD(P)H) [EC:1.7.1.1 1.7.1.2 1.7.1.3]
	Nitric oxide oxidation	hmp, YHB1	K05916	nitric oxide dioxygenase [EC:1.14.12.17]
	Periplasmic nitrite reduction	nirK	K00368	nitrite reductase (NO-forming) [EC:1.7.2.1] (Cu-containing nitrite reductase)
		nirS	K15864	nitrite reductase (NO-forming) / hydroxylamine reductase [EC:1.7.2.1 1.7.99.1] (haem- containing cd1 nitrite reductase)										M8-62_Bin_262_scaffold_404813_1
	Nitric oxide reduction	norB	K04561	nitric oxide reductase subunit B [EC:1.7.2.5] (catalytic subunit)											GCA_003599535_scaffold_102_6,GCA_003599535_scaffold_46_7
		norC	K02305	nitric oxide reductase subunit C											GCA_003599535_scaffold_102_7
		norE	K02164	nitric oxide reductase NorE protein
		norQ	K04748	nitric oxide reductase NorQ protein			GCA_002127415_scaffold_298_7
		norF	K04747	nitric oxide reductase NorF protein
		norD	K02448	nitric oxide reductase NorD protein
		CYP55	K15877	fungal nitric oxide reductase [EC:1.7.1.14] (NADH-dependent cytochrome P450 nitric oxide reductase (P450 NOR, p450nor))
		norV	K12264	anaerobic nitric oxide reductase flavorubredoxin																																							M3-30_Bin_374_scaffold_924_27
		norW	K12265	nitric oxide reductase FlRd-NAD(+) reductase [EC:1.18.1.-]															Meg19_46_Bin_239_scaffold_33496_4
	Hydroxylamine oxidatioin	hao	K10535	hydroxylamine dehydrogenase [EC:1.7.2.6]	Meg22_810_Bin_217_scaffold_42565_2	Meg19_1012_Bin_198_scaffold_2058_20		Ga0186947_scaffold_1055_9			Meg22_46_Bin_23_scaffold_6210_16	Meg19_1012_Bin_459_scaffold_563_34	M3-44_Bin_198_scaffold_257305_1	M8-62_Bin_262_scaffold_45288_5	GCA_003599535_scaffold_7_24	GCA_005223185_scaffold_15_79,GCA_005223185_scaffold_15_81		Meg19_1012_Bin_119_scaffold_26417_2	Meg19_46_Bin_239_scaffold_40387_1	Meg22_02_Bin_84_scaffold_44048_3	Meg19_46_Bin_60_scaffold_113717_1	Meg22_24_Bin_124_scaffold_254947_4		M3-38_Bin_215_scaffold_392845_1	M8-62_Bin_157_scaffold_14731_2,M8-62_Bin_157_scaffold_308886_2				BHB10-2_Bin_362_scaffold_41520_5			M3-44_Bin_119_scaffold_6766_17	GCA_003820615_scaffold_30_2	LQ108M_Bin_12_scaffold_140_53	Meg22_46_Bin_210_scaffold_67828_3								M3-30_Bin_374_scaffold_18230_8,M3-30_Bin_374_scaffold_18230_9			Meg19_02_Bin_5_scaffold_349078_3		Meg19_46_Bin_228_scaffold_72881_3	Meg22_46_Bin_45_scaffold_53855_3,Meg22_46_Bin_45_scaffold_62942_4
	Periplasmic nitrous oxide reduction	nosZ	K00376	nitrous-oxide reductase [EC:1.7.2.4] (catalytic subunit)														Meg19_1012_Bin_119_scaffold_8478_3	Meg19_46_Bin_239_scaffold_62384_1	Meg22_02_Bin_84_scaffold_195721_1	Meg19_46_Bin_60_scaffold_64117_2	Meg22_24_Bin_124_scaffold_68159_1	Meg22_46_Bin_213_scaffold_31962_12							M3-10_Bin_262_scaffold_257092_3,M3-10_Bin_262_scaffold_293212_2	M3-22_Bin_282_scaffold_107644_2
		nosD	K07218	nitrous oxide reduction; nitrous oxide accessory protein	Meg22_810_Bin_217_scaffold_144107_1,Meg22_810_Bin_217_scaffold_215842_1,Meg22_810_Bin_217_scaffold_51489_4,Meg22_810_Bin_217_scaffold_82076_1								M3-44_Bin_198_scaffold_287104_4,M3-44_Bin_198_scaffold_227968_3				Meg22_46_Bin_11_scaffold_127146_4	Meg19_1012_Bin_119_scaffold_8478_6		Meg22_02_Bin_84_scaffold_174343_3			Meg22_46_Bin_213_scaffold_31962_8							M3-10_Bin_262_scaffold_257092_1	M3-22_Bin_282_scaffold_102536_1									Meg22_24_Bin_129_scaffold_67122_1	BHB10-38_Bin_186_scaffold_93793_2
		nosF	K19340	Cu-processing system ATP-binding protein (cytoplasmic ABC subunit)																Meg22_02_Bin_84_scaffold_174343_2	Meg19_46_Bin_60_scaffold_64117_7		Meg22_46_Bin_213_scaffold_31962_7
		nosY	K19341	Cu-processing system permease protein (trans-membrane subunit)									M3-44_Bin_198_scaffold_376278_2				Meg22_46_Bin_11_scaffold_127146_1	Meg19_1012_Bin_119_scaffold_8478_9			Meg19_46_Bin_60_scaffold_64117_10	Meg22_24_Bin_124_scaffold_200679_5	Meg22_46_Bin_213_scaffold_31962_5					AB_03_Bin_160_scaffold_42264_4	BHB10-2_Bin_362_scaffold_130583_4	M3-10_Bin_262_scaffold_223401_2	M3-22_Bin_282_scaffold_102536_2						Meg22_1214_Bin_176_scaffold_18284_7						M3-30_Bin_374_scaffold_951_2	SY70-4-3_Bin_44_scaffold_102482_2
		nosL	K19342	copper chaperone NosL									M3-44_Bin_198_scaffold_227968_1				Meg22_46_Bin_11_scaffold_127146_2	Meg19_1012_Bin_119_scaffold_8478_4		Meg22_02_Bin_84_scaffold_259476_4	Meg19_46_Bin_60_scaffold_64117_3		Meg22_46_Bin_213_scaffold_31962_11						BHB10-2_Bin_362_scaffold_130583_3	M3-10_Bin_262_scaffold_257092_2	M3-22_Bin_282_scaffold_102536_3,M3-22_Bin_282_scaffold_107644_1
		nosR	K19339	NosR/NirI family transcriptional regulator, nitrous oxide reductase regulator													Meg22_46_Bin_11_scaffold_111072_4	Meg19_1012_Bin_119_scaffold_13479_4	Meg19_46_Bin_239_scaffold_14164_6				Meg22_46_Bin_213_scaffold_291108_3						BHB10-2_Bin_362_scaffold_327809_2		M3-22_Bin_282_scaffold_10740_2	M3-44_Bin_119_scaffold_6051_18
	Periplasmic dissimilatory nitrite reduction	nrfA	K03385	nitrite reductase (cytochrome c-552) [EC:1.7.2.2]					Ga0170695_scaffold_1073_3																															Meg22_24_Bin_129_scaffold_146778_3		BHB10-38_Bin_9_scaffold_22285_7			SY70-4-3_Bin_59_scaffold_2294_2
		nrfH	K15876	cytochrome c nitrite reductase small subunit					Ga0170695_scaffold_1073_2					M8-62_Bin_262_scaffold_201203_2																										Meg22_24_Bin_129_scaffold_146778_2		BHB10-38_Bin_9_scaffold_125576_6	M3-30_Bin_374_scaffold_2803_19		SY70-4-3_Bin_59_scaffold_2294_3
		nrfF	K04017	formate-dependent nitrite reductase complex subunit NrfF
		nrfG	K04018	formate-dependent nitrite reductase complex subunit NrfG
		NIT-6	K17877	nitrite reductase (NAD(P)H) [EC:1.7.1.4]
	Assimilatory nitrite reduction	nirB	K00362	nitrite reductase (NADH) large subunit [EC:1.7.1.15]										M8-62_Bin_262_scaffold_60339_5	GCA_003599535_scaffold_10_36		Meg22_46_Bin_11_scaffold_220031_2	Meg19_1012_Bin_119_scaffold_15227_5			Meg19_46_Bin_60_scaffold_8558_2	Meg22_24_Bin_124_scaffold_9078_1	Meg22_46_Bin_213_scaffold_16344_7							M3-10_Bin_262_scaffold_224446_2		M3-44_Bin_119_scaffold_6293_19								Meg22_24_Bin_129_scaffold_1760_1			M3-30_Bin_374_scaffold_1506_22				ex4484_8_scaffold_2565_2	Meg19_46_Bin_228_scaffold_108141_3	Meg22_46_Bin_45_scaffold_219141_1
		nirD	K00363	nitrite reductase (NADH) small subunit [EC:1.7.1.15]
		nirA	K00366	ferredoxin-nitrite reductase [EC:1.7.7.1]																									BHB10-2_Bin_362_scaffold_256054_5
	Nitrogen fixation	nifD	K02586	nitrogenase molybdenum-iron protein alpha chain [EC:1.18.6.1]
		nifH	K02588	nitrogenase iron protein NifH [EC:1.18.6.1]
		nifK	K02591	nitrogenase molybdenum-iron protein beta chain [EC:1.18.6.1]
		nifB	K02585	nitrogen fixation protein NifB
		vnfD	K22896	vanadium-dependent nitrogenase alpha chain
		vnfK	K22897	vanadium-dependent nitrogenase beta chain
		vnfG	K22898	vanadium nitrogenase delta subunit
		vnfH	K22899	vanadium nitrogenase iron protein
		anfG	K00531	nitrogenase delta subunit [EC:1.18.6.1]
	Hydrazine oxidation	hdh	K20935	hydrazine dehydrogenase [EC:1.7.2.8]
	Hydrazine synthesis	hzsC	K20932	hydrazine synthase subunit [EC:1.7.2.7]
		hzsB	K20933	hydrazine synthase subunit [EC:1.7.2.7]
		hzsA	K20934	hydrazine synthase subunit [EC:1.7.2.7]
	Aerobic ammonia oxidation	pmoA-amoA	K10944	methane/ammonia monooxygenase subunit A [EC:1.14.18.3 1.14.99.39]
		pmoB-amoB	K10945	methane/ammonia monooxygenase subunit B
		pmoC-amoC	K10946	methane/ammonia monooxygenase subunit C
	Hydroxylamine reduction	hcp	K05601	hydroxylamine reductase [EC:1.7.99.1]																															Meg22_46_Bin_210_scaffold_182243_2				Meg22_46_Bin_89_scaffold_216423_2	Meg22_24_Bin_129_scaffold_144361_3			M3-30_Bin_374_scaffold_924_31				ex4484_8_scaffold_2768_15	Meg19_46_Bin_228_scaffold_34089_3	Meg22_46_Bin_45_scaffold_309295_1
	Nitrite disproportionation	NP7	K22962	nitrite dismutase [EC:1.7.6.1]
	Ammonia assimilation	glnA, GLUL	K01915	glutamine synthetase [EC:6.3.1.2]	Meg22_810_Bin_217_scaffold_31968_2	Meg19_1012_Bin_198_scaffold_13450_2,Meg19_1012_Bin_198_scaffold_8679_1	GCA_002127415_scaffold_337_3	Ga0186947_scaffold_1001_94,Ga0186947_scaffold_1074_4		Meg22_1416_Bin_86_scaffold_81958_1	Meg22_46_Bin_23_scaffold_275537_1,Meg22_46_Bin_23_scaffold_41501_6	Meg19_1012_Bin_459_scaffold_16040_9,Meg19_1012_Bin_459_scaffold_531_20	M3-44_Bin_198_scaffold_239138_2,M3-44_Bin_198_scaffold_260086_1	M8-62_Bin_262_scaffold_20859_4,M8-62_Bin_262_scaffold_34474_5	GCA_003599535_scaffold_107_2,GCA_003599535_scaffold_32_31	GCA_005223185_scaffold_12_127,GCA_005223185_scaffold_7_219	Meg22_46_Bin_11_scaffold_62414_3,Meg22_46_Bin_11_scaffold_77658_3	Meg19_1012_Bin_119_scaffold_3088_12,Meg19_1012_Bin_119_scaffold_39796_6		Meg22_02_Bin_84_scaffold_137550_3	Meg19_46_Bin_60_scaffold_43271_4,Meg19_46_Bin_60_scaffold_50348_5	Meg22_24_Bin_124_scaffold_10625_5,Meg22_24_Bin_124_scaffold_13325_14	Meg22_46_Bin_213_scaffold_18599_17,Meg22_46_Bin_213_scaffold_66566_2	M3-38_Bin_215_scaffold_102131_2,M3-38_Bin_215_scaffold_299348_2	M8-62_Bin_157_scaffold_20642_15,M8-62_Bin_157_scaffold_213511_1,M8-62_Bin_157_scaffold_5367_18	M8-62_Bin_326_scaffold_87112_1	SY70-4-11_Bin_40_scaffold_27612_9	AB_03_Bin_160_scaffold_10919_3	BHB10-2_Bin_362_scaffold_78070_2	M3-10_Bin_262_scaffold_16941_11,M3-10_Bin_262_scaffold_36121_3	M3-22_Bin_282_scaffold_12375_6,M3-22_Bin_282_scaffold_7533_17	M3-44_Bin_119_scaffold_20111_4	GCA_003820615_scaffold_193_1,GCA_003820615_scaffold_683_1	LQ108M_Bin_12_scaffold_288_46,LQ108M_Bin_12_scaffold_2_375	Meg22_46_Bin_210_scaffold_17406_3,Meg22_46_Bin_210_scaffold_70178_2	Meg22_1012_Bin_348_scaffold_52101_8,Meg22_1012_Bin_348_scaffold_94877_4	Meg22_1214_Bin_176_scaffold_13693_19,Meg22_1214_Bin_176_scaffold_49685_3	Meg22_1214_Bin_137_scaffold_17817_2,Meg22_1214_Bin_137_scaffold_43882_1	Meg22_46_Bin_89_scaffold_56128_3	Meg22_24_Bin_129_scaffold_199215_1,Meg22_24_Bin_129_scaffold_3650_5	BHB10-38_Bin_186_scaffold_110982_3,BHB10-38_Bin_186_scaffold_265425_3,BHB10-38_Bin_186_scaffold_30242_3	BHB10-38_Bin_9_scaffold_128037_4	M3-30_Bin_374_scaffold_395_11,M3-30_Bin_374_scaffold_8642_6	SY70-4-3_Bin_44_scaffold_62346_2,SY70-4-3_Bin_44_scaffold_68966_2	SY70-4-3_Bin_59_scaffold_14685_4,SY70-4-3_Bin_59_scaffold_25475_2	Meg19_02_Bin_5_scaffold_120514_2,Meg19_02_Bin_5_scaffold_152757_1			Meg22_46_Bin_45_scaffold_113306_1,Meg22_46_Bin_45_scaffold_51231_4
		GLT1	K00264	glutamate synthase (NADH) [EC:1.4.1.14]
		gltB	K00265	glutamate synthase (NADPH) large chain [EC:1.4.1.13]
		gltD	K00266	glutamate synthase (NADPH) small chain [EC:1.4.1.13]	Meg22_810_Bin_217_scaffold_32700_4	Meg19_1012_Bin_198_scaffold_61220_6	GCA_002127415_scaffold_9_7,GCA_002127415_scaffold_277_3	Ga0186947_scaffold_1016_20		Meg22_1416_Bin_86_scaffold_98488_3		Meg19_1012_Bin_459_scaffold_5327_12	M3-44_Bin_198_scaffold_181373_1	M8-62_Bin_262_scaffold_84639_5,M8-62_Bin_262_scaffold_301549_2	GCA_003599535_scaffold_10_14	GCA_005223185_scaffold_7_401		Meg19_1012_Bin_119_scaffold_19495_12	Meg19_46_Bin_239_scaffold_128252_2				Meg22_46_Bin_213_scaffold_187604_3,Meg22_46_Bin_213_scaffold_28495_30				SY70-4-11_Bin_40_scaffold_79223_2	AB_03_Bin_160_scaffold_22996_4		M3-10_Bin_262_scaffold_62730_3	M3-22_Bin_282_scaffold_27356_6	M3-44_Bin_119_scaffold_3079_25	GCA_003820615_scaffold_114_1		Meg22_46_Bin_210_scaffold_63891_5	Meg22_1012_Bin_348_scaffold_26056_8	Meg22_1214_Bin_176_scaffold_5395_26	Meg22_1214_Bin_137_scaffold_21999_10,Meg22_1214_Bin_137_scaffold_67251_1	Meg22_46_Bin_89_scaffold_18666_15	Meg22_24_Bin_129_scaffold_1760_7,Meg22_24_Bin_129_scaffold_2248_6					SY70-4-3_Bin_59_scaffold_89758_1,SY70-4-3_Bin_59_scaffold_5520_8		ex4484_8_scaffold_1306_17
		GLU, gltS	K00284	glutamate synthase (ferredoxin) [EC:1.4.7.1]
		GLUD1_2	K00261	glutamate dehydrogenase (NAD(O)+) [EC:1.4.1.3]					Ga0170695_scaffold_1033_4	Meg22_1416_Bin_86_scaffold_59003_9			M3-44_Bin_198_scaffold_22705_10		GCA_003599535_scaffold_15_3,GCA_003599535_scaffold_58_13	GCA_005223185_scaffold_15_48												AB_03_Bin_160_scaffold_45908_3	BHB10-2_Bin_362_scaffold_203290_2	M3-10_Bin_262_scaffold_75048_1	M3-22_Bin_282_scaffold_14569_4		GCA_003820615_scaffold_315_10,GCA_003820615_scaffold_690_1,GCA_003820615_scaffold_649_2	LQ108M_Bin_12_scaffold_359_26,LQ108M_Bin_12_scaffold_17_111		Meg22_1012_Bin_348_scaffold_159447_1	Meg22_1214_Bin_176_scaffold_77407_2			Meg22_24_Bin_129_scaffold_15313_5								Meg19_46_Bin_228_scaffold_36499_3
		gdhA	K00262	glutamate dehydrogenase (NADP+) [EC:1.4.1.4]		Meg19_1012_Bin_198_scaffold_7941_6	GCA_002127415_scaffold_130_3			Meg22_1416_Bin_86_scaffold_130302_2		Meg19_1012_Bin_459_scaffold_1951_22		M8-62_Bin_262_scaffold_30979_3,M8-62_Bin_262_scaffold_5560_17	GCA_003599535_scaffold_15_4									M3-38_Bin_215_scaffold_136677_2	M8-62_Bin_157_scaffold_26944_4			AB_03_Bin_160_scaffold_10012_10	BHB10-2_Bin_362_scaffold_463632_1	M3-10_Bin_262_scaffold_69731_1	M3-22_Bin_282_scaffold_51652_7	M3-44_Bin_119_scaffold_1082_76		LQ108M_Bin_12_scaffold_288_102		Meg22_1012_Bin_348_scaffold_72139_3	Meg22_1214_Bin_176_scaffold_220634_1		Meg22_46_Bin_89_scaffold_52650_3	Meg22_24_Bin_129_scaffold_4010_11		BHB10-38_Bin_9_scaffold_128442_3	M3-30_Bin_374_scaffold_2903_18		SY70-4-3_Bin_59_scaffold_36087_2
		GDH2	K15371	glutamate dehydrogenase [EC:1.4.1.2]													Meg22_46_Bin_11_scaffold_82600_3	Meg19_1012_Bin_119_scaffold_6657_25		Meg22_02_Bin_84_scaffold_141760_1	Meg19_46_Bin_60_scaffold_184151_1	Meg22_24_Bin_124_scaffold_23810_3	Meg22_46_Bin_213_scaffold_56038_2				SY70-4-11_Bin_40_scaffold_16609_1														BHB10-38_Bin_186_scaffold_227775_1
		gudB, rocG	K00260	glutamate dehydrogenase [EC:1.4.1.2] NAD+	Meg22_810_Bin_217_scaffold_167170_2	Meg19_1012_Bin_198_scaffold_1771_22						Meg19_1012_Bin_459_scaffold_284_83																	BHB10-2_Bin_362_scaffold_239254_3,BHB10-2_Bin_362_scaffold_37146_17		M3-22_Bin_282_scaffold_139487_2											BHB10-38_Bin_9_scaffold_10554_7		SY70-4-3_Bin_44_scaffold_25583_3	SY70-4-3_Bin_59_scaffold_46783_2
	Nitrile hydration	nthA	K01721	nitrile hydratase subunit alpha [EC:4.2.1.84]
		nthB	K20807	nitrile hydratase subunit beta [EC:4.2.1.84]
	carbamoyl phosphate degradation	CPS1	K01948	carbamoyl-phosphate synthase (ammonia) [EC:6.3.4.16]
		arcC	K00926	carbamate kinase [EC:2.7.2.2]	Meg22_810_Bin_217_scaffold_211874_3	Meg19_1012_Bin_198_scaffold_8718_9	GCA_002127415_scaffold_347_2	Ga0186947_scaffold_1001_78	Ga0170695_scaffold_1123_1	Meg22_1416_Bin_86_scaffold_74503_2		Meg19_1012_Bin_459_scaffold_5327_23	M3-44_Bin_198_scaffold_231086_2	M8-62_Bin_262_scaffold_151043_3,M8-62_Bin_262_scaffold_69755_3	GCA_003599535_scaffold_10_3	GCA_005223185_scaffold_7_414	Meg22_46_Bin_11_scaffold_40044_3	Meg19_1012_Bin_119_scaffold_4522_6	Meg19_46_Bin_239_scaffold_167770_1	Meg22_02_Bin_84_scaffold_17066_1	Meg19_46_Bin_60_scaffold_6236_3	Meg22_24_Bin_124_scaffold_43412_3	Meg22_46_Bin_213_scaffold_19485_25	M3-38_Bin_215_scaffold_251089_2,M3-38_Bin_215_scaffold_421420_2	M8-62_Bin_157_scaffold_45289_5,M8-62_Bin_157_scaffold_46639_4		SY70-4-11_Bin_40_scaffold_1663_12	AB_03_Bin_160_scaffold_130248_3,AB_03_Bin_160_scaffold_67829_1	BHB10-2_Bin_362_scaffold_177269_2,BHB10-2_Bin_362_scaffold_30408_5	M3-10_Bin_262_scaffold_76671_3	M3-22_Bin_282_scaffold_44618_4	M3-44_Bin_119_scaffold_2346_31	GCA_003820615_scaffold_462_1	LQ108M_Bin_12_scaffold_12_14		Meg22_1012_Bin_348_scaffold_20523_2	Meg22_1214_Bin_176_scaffold_20940_5	Meg22_1214_Bin_137_scaffold_23225_5	Meg22_46_Bin_89_scaffold_2524_20	Meg22_24_Bin_129_scaffold_119125_1	BHB10-38_Bin_186_scaffold_71817_5,BHB10-38_Bin_186_scaffold_92914_4		M3-30_Bin_374_scaffold_1506_41	SY70-4-3_Bin_44_scaffold_11480_3		Meg19_02_Bin_5_scaffold_74747_6	ex4484_8_scaffold_565_21	Meg19_46_Bin_228_scaffold_86997_2
	Nitroalkane oxidation	ncd2, npd	K00459	nitronate monooxygenase [EC:1.13.12.16]		Meg19_1012_Bin_198_scaffold_1620_9		Ga0186947_scaffold_1023_8,Ga0186947_scaffold_1038_8			Meg22_46_Bin_23_scaffold_20955_8	Meg19_1012_Bin_459_scaffold_15339_20	M3-44_Bin_198_scaffold_59885_3	M8-62_Bin_262_scaffold_444456_1		GCA_005223185_scaffold_7_431	Meg22_46_Bin_11_scaffold_181075_1	Meg19_1012_Bin_119_scaffold_11800_5,Meg19_1012_Bin_119_scaffold_25813_8		Meg22_02_Bin_84_scaffold_46345_3	Meg19_46_Bin_60_scaffold_129304_1,Meg19_46_Bin_60_scaffold_32009_10	Meg22_24_Bin_124_scaffold_49269_4	Meg22_46_Bin_213_scaffold_314977_3,Meg22_46_Bin_213_scaffold_4104_34			M8-62_Bin_326_scaffold_72631_5	SY70-4-11_Bin_40_scaffold_18293_3	AB_03_Bin_160_scaffold_47672_1			M3-22_Bin_282_scaffold_194806_9					Meg22_1012_Bin_348_scaffold_75942_2		Meg22_1214_Bin_137_scaffold_24593_3				BHB10-38_Bin_9_scaffold_12597_12	M3-30_Bin_374_scaffold_924_34		SY70-4-3_Bin_59_scaffold_70578_1
		NAO	K19823	nitroalkane oxidase [EC:1.7.3.1]
	Nitrate/Nitrite transporter	NRT, narK, nrtP, nasA	K02575	MFS transporter, NNP family, nitrate/nitrite transporter																				M3-38_Bin_215_scaffold_159482_4	M8-62_Bin_157_scaffold_220216_1,M8-62_Bin_157_scaffold_220216_2,M8-62_Bin_157_scaffold_47124_4			AB_03_Bin_160_scaffold_63111_1
		nrtA, nasF, cynA	K15576	nitrate/nitrite transport system substrate-binding protein
		nrtB, nasE, cynB	K15577	nitrate/nitrite transport system permease protein
		nrtC, nasD	K15578	nitrate/nitrite transport system ATP-binding protein [EC:3.6.3.-]
		nrtD, cynD	K15579	nitrate/nitrite transport system ATP-binding protein
		nirC	K02598	nitrite transporter
		narT	K10850	MFS transporter, NNP family, putative nitrate transporter
	Ammonium transporter	amt, AMT, MEP	K03320	ammonium transporter, Amt family
		SLC42A, RHAG, RHBG, RHCG, CD241	K06580	ammonium transporter Rh											GCA_003599535_scaffold_3_37
Glycolysis	Glucokinase/Hexokinase	HK	K00844	hexokinase [EC:2.7.1.1]
		GCK	K12407	glucokinase [EC:2.7.1.2]
		glk	K00845	glucokinase [EC:2.7.1.2]		Meg19_1012_Bin_198_scaffold_5906_13	GCA_002127415_scaffold_304_2	Ga0186947_scaffold_1006_29			Meg22_46_Bin_23_scaffold_173583_2	Meg19_1012_Bin_459_scaffold_284_112	M3-44_Bin_198_scaffold_188257_2	M8-62_Bin_262_scaffold_7935_4	GCA_003599535_scaffold_68_13	GCA_005223185_scaffold_6_66	Meg22_46_Bin_11_scaffold_45538_2	Meg19_1012_Bin_119_scaffold_109013_2,Meg19_1012_Bin_119_scaffold_27735_2	Meg19_46_Bin_239_scaffold_15685_4,Meg19_46_Bin_239_scaffold_71119_2				Meg22_46_Bin_213_scaffold_22738_2		M8-62_Bin_157_scaffold_34236_9	M8-62_Bin_326_scaffold_179668_3	SY70-4-11_Bin_40_scaffold_25887_2	AB_03_Bin_160_scaffold_33256_2,AB_03_Bin_160_scaffold_3714_5	BHB10-2_Bin_362_scaffold_210005_3,BHB10-2_Bin_362_scaffold_336047_1	M3-10_Bin_262_scaffold_235709_2	M3-22_Bin_282_scaffold_13041_7	M3-44_Bin_119_scaffold_1301_9	GCA_003820615_scaffold_229_2,GCA_003820615_scaffold_250_1,GCA_003820615_scaffold_34_2	LQ108M_Bin_12_scaffold_29_209	Meg22_46_Bin_210_scaffold_65583_3	Meg22_1012_Bin_348_scaffold_28794_6	Meg22_1214_Bin_176_scaffold_1271_26		Meg22_46_Bin_89_scaffold_1420_8	Meg22_24_Bin_129_scaffold_303166_1	BHB10-38_Bin_186_scaffold_295871_2	BHB10-38_Bin_9_scaffold_53067_2	M3-30_Bin_374_scaffold_1585_27			Meg19_02_Bin_5_scaffold_100265_1	ex4484_8_scaffold_1181_12		Meg22_46_Bin_45_scaffold_27173_2
		glk	K25026	glucokinase [EC:2.7.1.2]
		ppgK	K00886	polyphosphate glucokinase [EC:2.7.1.63]
		ADPGK	K08074	ADP-dependent glucokinase [EC:2.7.1.147]
		pfkC	K00918	ADP-dependent phosphofructokinase/glucokinase [EC:2.7.1.146 2.7.1.147]
	Glucose-6-phosphate isomerase	GPI, pgi	K01810	glucose-6-phosphate isomerase [EC:5.3.1.9]	Meg22_810_Bin_217_scaffold_37950_7	Meg19_1012_Bin_198_scaffold_7941_13	GCA_002127415_scaffold_92_3	Ga0186947_scaffold_1036_17		Meg22_1416_Bin_86_scaffold_99112_2		Meg19_1012_Bin_459_scaffold_311_46	M3-44_Bin_198_scaffold_66239_2	M8-62_Bin_262_scaffold_119881_3	GCA_003599535_scaffold_57_15	GCA_005223185_scaffold_7_189							Meg22_46_Bin_213_scaffold_33117_5						BHB10-2_Bin_362_scaffold_210005_2	M3-10_Bin_262_scaffold_235709_3	M3-22_Bin_282_scaffold_13041_6	M3-44_Bin_119_scaffold_1301_8	GCA_003820615_scaffold_285_1					Meg22_1214_Bin_137_scaffold_46529_3	Meg22_46_Bin_89_scaffold_62299_9	Meg22_24_Bin_129_scaffold_48158_1			M3-30_Bin_374_scaffold_1979_11
		pgi1	K06859	glucose-6-phosphate isomerase, archaeal
		tal-pgi	K13810	transaldolase / glucose-6-phosphate isomerase [EC:2.2.1.2 5.3.1.9]											GCA_003599535_scaffold_23_19		Meg22_46_Bin_11_scaffold_29289_6	Meg19_1012_Bin_119_scaffold_6657_6	Meg19_46_Bin_239_scaffold_18897_7		Meg19_46_Bin_60_scaffold_32563_5	Meg22_24_Bin_124_scaffold_12849_2			M8-62_Bin_157_scaffold_1879_38			AB_03_Bin_160_scaffold_38623_3						LQ108M_Bin_12_scaffold_12_210					Meg22_46_Bin_89_scaffold_16174_6
		pgi-pmi	K15916	glucose/mannose-6-phosphate isomerase [EC:5.3.1.9 5.3.1.8]	Meg22_810_Bin_217_scaffold_107465_8	Meg19_1012_Bin_198_scaffold_381_5	GCA_002127415_scaffold_296_10			Meg22_1416_Bin_86_scaffold_58666_2	Meg22_46_Bin_23_scaffold_54178_2	Meg19_1012_Bin_459_scaffold_15559_8	M3-44_Bin_198_scaffold_486506_3	M8-62_Bin_262_scaffold_281124_1,M8-62_Bin_262_scaffold_60859_6	GCA_003599535_scaffold_111_7	GCA_005223185_scaffold_18_25		Meg19_1012_Bin_119_scaffold_27861_10	Meg19_46_Bin_239_scaffold_26375_2	Meg22_02_Bin_84_scaffold_75254_3	Meg19_46_Bin_60_scaffold_34321_1	Meg22_24_Bin_124_scaffold_31405_9	Meg22_46_Bin_213_scaffold_57977_7	M3-38_Bin_215_scaffold_182873_4	M8-62_Bin_157_scaffold_29528_6,M8-62_Bin_157_scaffold_31806_7		SY70-4-11_Bin_40_scaffold_49320_3	AB_03_Bin_160_scaffold_47582_2	BHB10-2_Bin_362_scaffold_43407_1	M3-10_Bin_262_scaffold_128442_3	M3-22_Bin_282_scaffold_11176_7	M3-44_Bin_119_scaffold_17317_19		LQ108M_Bin_12_scaffold_29_258	Meg22_46_Bin_210_scaffold_161606_2	Meg22_1012_Bin_348_scaffold_45995_7	Meg22_1214_Bin_176_scaffold_5401_22		Meg22_46_Bin_89_scaffold_23001_6	Meg22_24_Bin_129_scaffold_16118_4,Meg22_24_Bin_129_scaffold_192628_8		BHB10-38_Bin_9_scaffold_67563_1	M3-30_Bin_374_scaffold_410_57	SY70-4-3_Bin_44_scaffold_10627_2	SY70-4-3_Bin_59_scaffold_116222_2	Meg19_02_Bin_5_scaffold_216726_2			Meg22_46_Bin_45_scaffold_23635_5
	6-phosphofructokinase	pfkA,PFK	K00850	6-phosphofructokinase 1 [EC:2.7.1.11]									M3-44_Bin_198_scaffold_309899_2	M8-62_Bin_262_scaffold_194514_2,M8-62_Bin_262_scaffold_453864_1	GCA_003599535_scaffold_3_21													AB_03_Bin_160_scaffold_130707_2				M3-44_Bin_119_scaffold_4771_24		LQ108M_Bin_12_scaffold_12_214													ex4484_8_scaffold_1856_9	Meg19_46_Bin_228_scaffold_91891_2
		pfkB	K16370	6-phosphofructokinase 2 [EC:2.7.1.11]
		pfk, pfp	K21071	ATP-dependent phosphofructokinase / diphosphate-dependent phosphofructokinase [EC:2.7.1.11 2.7.1.90]		Meg19_1012_Bin_198_scaffold_7185_2	GCA_002127415_scaffold_144_2,GCA_002127415_scaffold_108_4	Ga0186947_scaffold_1069_1	Ga0170695_scaffold_1055_10	Meg22_1416_Bin_86_scaffold_51717_1	Meg22_46_Bin_23_scaffold_42019_3,Meg22_46_Bin_23_scaffold_82973_5	Meg19_1012_Bin_459_scaffold_120_16,Meg19_1012_Bin_459_scaffold_2560_63	M3-44_Bin_198_scaffold_309899_2,M3-44_Bin_198_scaffold_311962_2	M8-62_Bin_262_scaffold_194514_2,M8-62_Bin_262_scaffold_32830_6,M8-62_Bin_262_scaffold_453864_1	GCA_003599535_scaffold_38_8,GCA_003599535_scaffold_3_21	GCA_005223185_scaffold_12_445,GCA_005223185_scaffold_14_62	Meg22_46_Bin_11_scaffold_167157_2	Meg19_1012_Bin_119_scaffold_18292_3		Meg22_02_Bin_84_scaffold_16558_3	Meg19_46_Bin_60_scaffold_26376_3	Meg22_24_Bin_124_scaffold_51846_2	Meg22_46_Bin_213_scaffold_127993_2		M8-62_Bin_157_scaffold_47480_5	M8-62_Bin_326_scaffold_41163_5	SY70-4-11_Bin_40_scaffold_91638_2			M3-10_Bin_262_scaffold_104482_1,M3-10_Bin_262_scaffold_92924_1	M3-22_Bin_282_scaffold_107367_2,M3-22_Bin_282_scaffold_42809_5	M3-44_Bin_119_scaffold_3275_27,M3-44_Bin_119_scaffold_822_8	GCA_003820615_scaffold_676_2	LQ108M_Bin_12_scaffold_17_62,LQ108M_Bin_12_scaffold_2_349	Meg22_46_Bin_210_scaffold_19234_5,Meg22_46_Bin_210_scaffold_29210_2	Meg22_1012_Bin_348_scaffold_40774_6,Meg22_1012_Bin_348_scaffold_55352_6	Meg22_1214_Bin_176_scaffold_33759_6,Meg22_1214_Bin_176_scaffold_5395_16	Meg22_1214_Bin_137_scaffold_6127_3,Meg22_1214_Bin_137_scaffold_70930_3	Meg22_46_Bin_89_scaffold_18666_6,Meg22_46_Bin_89_scaffold_4101_12	Meg22_24_Bin_129_scaffold_2248_16,Meg22_24_Bin_129_scaffold_3006_11			M3-30_Bin_374_scaffold_15648_2		SY70-4-3_Bin_59_scaffold_13086_7	Meg19_02_Bin_5_scaffold_20858_4,Meg19_02_Bin_5_scaffold_112071_3	ex4484_8_scaffold_2179_7	Meg19_46_Bin_228_scaffold_33821_5	Meg22_46_Bin_45_scaffold_6244_12
		pfkC	K00918	ADP-dependent phosphofructokinase/glucokinase [EC:2.7.1.146 2.7.1.147]
		PFK9	K24182	6-phosphofructokinase [EC:2.7.1.11]
	Fructose-bisphosphate aldolase	ALDO	K01623	fructose-bisphosphate aldolase, class I [EC:4.1.2.13]													Meg22_46_Bin_11_scaffold_29289_3	Meg19_1012_Bin_119_scaffold_6657_4	Meg19_46_Bin_239_scaffold_18897_5	Meg22_02_Bin_84_scaffold_105865_1,Meg22_02_Bin_84_scaffold_94911_2,Meg22_02_Bin_84_scaffold_94911_3	Meg19_46_Bin_60_scaffold_32563_3	Meg22_24_Bin_124_scaffold_12849_4	Meg22_46_Bin_213_scaffold_240039_1,Meg22_46_Bin_213_scaffold_33117_7				SY70-4-11_Bin_40_scaffold_27749_2																				ex4484_8_scaffold_67_39	Meg19_46_Bin_228_scaffold_85172_3	Meg22_46_Bin_45_scaffold_283390_4
		FBA, fbaA	K01624	fructose-bisphosphate aldolase, class II [EC:4.1.2.13]							Meg22_46_Bin_23_scaffold_42019_4	Meg19_1012_Bin_459_scaffold_2560_64	M3-44_Bin_198_scaffold_309899_3	M8-62_Bin_262_scaffold_194514_1	GCA_003599535_scaffold_3_18	GCA_005223185_scaffold_12_444,GCA_005223185_scaffold_4_206																	GCA_003820615_scaffold_829_1	LQ108M_Bin_12_scaffold_359_54			Meg22_1214_Bin_176_scaffold_5395_15	Meg22_1214_Bin_137_scaffold_70930_4	Meg22_46_Bin_89_scaffold_18666_5	Meg22_24_Bin_129_scaffold_2248_17					SY70-4-3_Bin_59_scaffold_120408_3				Meg22_46_Bin_45_scaffold_6244_13
		fbaB	K11645	fructose-bisphosphate aldolase, class I [EC:4.1.2.13]	Meg22_810_Bin_217_scaffold_45922_3	Meg19_1012_Bin_198_scaffold_242_10	GCA_002127415_scaffold_326_5	Ga0186947_scaffold_1063_9	Ga0170695_scaffold_1020_9		Meg22_46_Bin_23_scaffold_48325_3	Meg19_1012_Bin_459_scaffold_55_2	M3-44_Bin_198_scaffold_53428_2		GCA_003599535_scaffold_58_15									M3-38_Bin_215_scaffold_488373_2	M8-62_Bin_157_scaffold_8184_6	M8-62_Bin_326_scaffold_81354_4			BHB10-2_Bin_362_scaffold_61718_8	M3-10_Bin_262_scaffold_72173_2	M3-22_Bin_282_scaffold_12462_8	M3-44_Bin_119_scaffold_1941_58
		K16305	K16305	fructose-bisphosphate aldolase / 6-deoxy-5-ketofructose 1-phosphate synthase [EC:4.1.2.13 2.2.1.11]
		K16306	K16306	fructose-bisphosphate aldolase / 2-amino-3,7-dideoxy-D-threo-hept-6-ulosonate synthase [EC:4.1.2.13 2.2.1.10]	Meg22_810_Bin_217_scaffold_182530_3
		K01622	K01622	fructose 1,6-bisphosphate aldolase/phosphatase [EC:4.1.2.13 3.1.3.11]																															Meg22_46_Bin_210_scaffold_72533_1	Meg22_1012_Bin_348_scaffold_12478_8	Meg22_1214_Bin_176_scaffold_20173_7	Meg22_1214_Bin_137_scaffold_36694_5			BHB10-38_Bin_186_scaffold_40610_7	BHB10-38_Bin_9_scaffold_58106_14	M3-30_Bin_374_scaffold_2497_18				ex4484_8_scaffold_948_10	Meg19_46_Bin_228_scaffold_11332_2
	Triosephosphate isomerase	TPI,tpiA	K01803	triosephosphate isomerase (TIM) [EC:5.3.1.1]		Meg19_1012_Bin_198_scaffold_11336_3	GCA_002127415_scaffold_160_3	Ga0186947_scaffold_1084_2			Meg22_46_Bin_23_scaffold_121164_2	Meg19_1012_Bin_459_scaffold_2560_67		M8-62_Bin_262_scaffold_150268_3,M8-62_Bin_262_scaffold_150268_4	GCA_003599535_scaffold_3_15,GCA_003599535_scaffold_3_16	GCA_005223185_scaffold_12_441,GCA_005223185_scaffold_12_442,GCA_005223185_scaffold_1_11		Meg19_1012_Bin_119_scaffold_220604_3						M3-38_Bin_215_scaffold_406069_2	M8-62_Bin_157_scaffold_7773_10	M8-62_Bin_326_scaffold_31413_2	SY70-4-11_Bin_40_scaffold_10864_3	AB_03_Bin_160_scaffold_125876_3	BHB10-2_Bin_362_scaffold_12609_10		M3-22_Bin_282_scaffold_7891_5	M3-44_Bin_119_scaffold_1092_6	GCA_003820615_scaffold_98_2	LQ108M_Bin_12_scaffold_12_564	Meg22_46_Bin_210_scaffold_111134_6,Meg22_46_Bin_210_scaffold_111134_7		Meg22_1214_Bin_176_scaffold_5395_12,Meg22_1214_Bin_176_scaffold_5395_13		Meg22_46_Bin_89_scaffold_18666_2	Meg22_24_Bin_129_scaffold_2248_20					SY70-4-3_Bin_59_scaffold_81691_3		ex4484_8_scaffold_2179_10	Meg19_46_Bin_228_scaffold_33821_2	Meg22_46_Bin_45_scaffold_252702_1
	Glyceraldehyde 3-phosphate dehydrogenase	GAPDH, gapA	K00134	glyceraldehyde 3-phosphate dehydrogenase (phosphorylating) [EC:1.2.1.12]		Meg19_1012_Bin_198_scaffold_11336_1	GCA_002127415_scaffold_114_1,GCA_002127415_scaffold_251_1	Ga0186947_scaffold_1084_4			Meg22_46_Bin_23_scaffold_42019_5	Meg19_1012_Bin_459_scaffold_2560_65		M8-62_Bin_262_scaffold_150268_2	GCA_003599535_scaffold_3_17	GCA_005223185_scaffold_12_443		Meg19_1012_Bin_119_scaffold_67914_4	Meg19_46_Bin_239_scaffold_101249_3	Meg22_02_Bin_84_scaffold_59144_4	Meg19_46_Bin_60_scaffold_227311_1	Meg22_24_Bin_124_scaffold_75471_3	Meg22_46_Bin_213_scaffold_46790_3		M8-62_Bin_157_scaffold_7773_8	M8-62_Bin_326_scaffold_31413_4,M8-62_Bin_326_scaffold_374299_3	SY70-4-11_Bin_40_scaffold_10864_1	AB_03_Bin_160_scaffold_125876_1,AB_03_Bin_160_scaffold_28230_2	BHB10-2_Bin_362_scaffold_12609_8	M3-10_Bin_262_scaffold_108607_2	M3-22_Bin_282_scaffold_7891_3	M3-44_Bin_119_scaffold_1092_8	GCA_003820615_scaffold_184_2	LQ108M_Bin_12_scaffold_12_551,LQ108M_Bin_12_scaffold_12_566	Meg22_46_Bin_210_scaffold_111134_8		Meg22_1214_Bin_176_scaffold_5395_14	Meg22_1214_Bin_137_scaffold_70930_5	Meg22_46_Bin_89_scaffold_18666_4	Meg22_24_Bin_129_scaffold_2248_18	BHB10-38_Bin_186_scaffold_430576_2				SY70-4-3_Bin_59_scaffold_120408_2		ex4484_8_scaffold_2179_8	Meg19_46_Bin_228_scaffold_33821_4	Meg22_46_Bin_45_scaffold_6244_14
		gpap2	K00150	glyceraldehyde-3-phosphate dehydrogenase (NAD(P)) [EC:1.2.1.59]
		GAPDHS	K10705	glyceraldehyde-3-phosphate dehydrogenase (phosphorylating), spermatogenic [EC:1.2.1.12]
	Phosphoglycerate kinase	PGK, pgk	K00927	phosphoglycerate kinase [EC:2.7.2.3]		Meg19_1012_Bin_198_scaffold_11336_2	GCA_002127415_scaffold_160_2	Ga0186947_scaffold_1084_3			Meg22_46_Bin_23_scaffold_121164_1,Meg22_46_Bin_23_scaffold_42019_6	Meg19_1012_Bin_459_scaffold_2560_66		M8-62_Bin_262_scaffold_150268_3	GCA_003599535_scaffold_3_16	GCA_005223185_scaffold_12_442		Meg19_1012_Bin_119_scaffold_220604_1,Meg19_1012_Bin_119_scaffold_220604_2,Meg19_1012_Bin_119_scaffold_67914_5		Meg22_02_Bin_84_scaffold_59144_5	Meg19_46_Bin_60_scaffold_227311_2	Meg22_24_Bin_124_scaffold_75471_4	Meg22_46_Bin_213_scaffold_46790_4	M3-38_Bin_215_scaffold_406069_1	M8-62_Bin_157_scaffold_7773_9	M8-62_Bin_326_scaffold_31413_3	SY70-4-11_Bin_40_scaffold_10864_2	AB_03_Bin_160_scaffold_125876_2	BHB10-2_Bin_362_scaffold_12609_9	M3-10_Bin_262_scaffold_108607_1	M3-22_Bin_282_scaffold_7891_4	M3-44_Bin_119_scaffold_1092_7	GCA_003820615_scaffold_184_3,GCA_003820615_scaffold_98_3	LQ108M_Bin_12_scaffold_12_565	Meg22_46_Bin_210_scaffold_111134_7		Meg22_1214_Bin_176_scaffold_5395_13	Meg22_1214_Bin_137_scaffold_70930_6	Meg22_46_Bin_89_scaffold_18666_3	Meg22_24_Bin_129_scaffold_2248_19					SY70-4-3_Bin_59_scaffold_81691_4		ex4484_8_scaffold_2179_9	Meg19_46_Bin_228_scaffold_33821_3	Meg22_46_Bin_45_scaffold_6244_15
	glyceraldehyde-3-phosphate dehydrogenase	gapN	K00131	glyceraldehyde-3-phosphate dehydrogenase (NADP+) [EC:1.2.1.9]
		gapor	K11389	glyceraldehyde-3-phosphate dehydrogenase (ferredoxin) [EC:1.2.7.6]
		gapN	K18978	glyceraldehyde-3-phosphate dehydrogenase [NAD(P)+] [EC:1.2.1.90]
	Phosphoglycerate mutase	PGAM, gpmA	K01834	2,3-bisphosphoglycerate-dependent phosphoglycerate mutase [EC:5.4.2.11]									M3-44_Bin_198_scaffold_293227_3																													BHB10-38_Bin_9_scaffold_86947_5		SY70-4-3_Bin_44_scaffold_60995_2	SY70-4-3_Bin_59_scaffold_55774_1
		gpmI	K15633	2,3-bisphosphoglycerate-independent phosphoglycerate mutase [EC:5.4.2.12]	Meg22_810_Bin_217_scaffold_19388_1	Meg19_1012_Bin_198_scaffold_163992_1,Meg19_1012_Bin_198_scaffold_9162_1	GCA_002127415_scaffold_166_2	Ga0186947_scaffold_1020_14	Ga0170695_scaffold_1056_6			Meg19_1012_Bin_459_scaffold_971_23,Meg19_1012_Bin_459_scaffold_369_55	M3-44_Bin_198_scaffold_53150_2,M3-44_Bin_198_scaffold_249956_4	M8-62_Bin_262_scaffold_45031_5,M8-62_Bin_262_scaffold_30222_10	GCA_003599535_scaffold_28_21,GCA_003599535_scaffold_87_5	GCA_005223185_scaffold_9_74															M3-22_Bin_282_scaffold_89645_4		GCA_003820615_scaffold_634_4		Meg22_46_Bin_210_scaffold_103002_1,Meg22_46_Bin_210_scaffold_130522_5,Meg22_46_Bin_210_scaffold_233621_1			Meg22_1214_Bin_137_scaffold_41810_4	Meg22_46_Bin_89_scaffold_17564_2	Meg22_24_Bin_129_scaffold_51315_2		BHB10-38_Bin_9_scaffold_12050_10	M3-30_Bin_374_scaffold_1398_21
		gpmB	K15634	2,3-bisphosphoglycerate-dependent phosphoglycerate mutase [EC:5.4.2.11]															Meg19_46_Bin_239_scaffold_11918_9						M8-62_Bin_157_scaffold_29530_12	M8-62_Bin_326_scaffold_34694_6										Meg22_1012_Bin_348_scaffold_124782_3
		apgM	K15635	2,3-bisphosphoglycerate-independent phosphoglycerate mutase [EC:5.4.2.12]									M3-44_Bin_198_scaffold_1360260_2,M3-44_Bin_198_scaffold_1360260_3				Meg22_46_Bin_11_scaffold_70877_5	Meg19_1012_Bin_119_scaffold_4341_6			Meg19_46_Bin_60_scaffold_60644_2	Meg22_24_Bin_124_scaffold_133813_2	Meg22_46_Bin_213_scaffold_92412_4	M3-38_Bin_215_scaffold_189454_3	M8-62_Bin_157_scaffold_10929_15	M8-62_Bin_326_scaffold_477679_2	SY70-4-11_Bin_40_scaffold_6818_5	AB_03_Bin_160_scaffold_181614_2,AB_03_Bin_160_scaffold_59653_2	BHB10-2_Bin_362_scaffold_420697_2	M3-10_Bin_262_scaffold_214207_2	M3-22_Bin_282_scaffold_18339_4	M3-44_Bin_119_scaffold_3774_18	GCA_003820615_scaffold_125_2	LQ108M_Bin_12_scaffold_12_3,LQ108M_Bin_12_scaffold_140_58	Meg22_46_Bin_210_scaffold_106927_4,Meg22_46_Bin_210_scaffold_256938_2		Meg22_1214_Bin_176_scaffold_3287_25				BHB10-38_Bin_186_scaffold_77068_9				SY70-4-3_Bin_59_scaffold_123988_2		ex4484_8_scaffold_200_7	Meg19_46_Bin_228_scaffold_102813_3	Meg22_46_Bin_45_scaffold_38278_3
		BPGM	K01837	bisphosphoglycerate/phosphoglycerate mutase [EC:5.4.2.4 5.4.2.11]
	Enolase	ENO, eno	K01689	enolase [EC:4.2.1.11]		Meg19_1012_Bin_198_scaffold_18367_4	GCA_002127415_scaffold_7_9	Ga0186947_scaffold_1021_20		Meg22_1416_Bin_86_scaffold_86776_1	Meg22_46_Bin_23_scaffold_78214_1	Meg19_1012_Bin_459_scaffold_434_18	M3-44_Bin_198_scaffold_73375_4	M8-62_Bin_262_scaffold_6800_5	GCA_003599535_scaffold_45_4	GCA_005223185_scaffold_14_52		Meg19_1012_Bin_119_scaffold_7109_13	Meg19_46_Bin_239_scaffold_5562_9	Meg22_02_Bin_84_scaffold_138622_1	Meg19_46_Bin_60_scaffold_191751_1,Meg19_46_Bin_60_scaffold_36478_6	Meg22_24_Bin_124_scaffold_10048_1,Meg22_24_Bin_124_scaffold_6792_1	Meg22_46_Bin_213_scaffold_18129_1,Meg22_46_Bin_213_scaffold_21992_1	M3-38_Bin_215_scaffold_180262_4	M8-62_Bin_157_scaffold_112471_2,M8-62_Bin_157_scaffold_23508_6		SY70-4-11_Bin_40_scaffold_94243_2		BHB10-2_Bin_362_scaffold_50273_1	M3-10_Bin_262_scaffold_194258_2,M3-10_Bin_262_scaffold_33790_8	M3-22_Bin_282_scaffold_10966_9,M3-22_Bin_282_scaffold_213838_1	M3-44_Bin_119_scaffold_23116_3,M3-44_Bin_119_scaffold_7903_4	GCA_003820615_scaffold_279_3	LQ108M_Bin_12_scaffold_12_89				Meg22_1214_Bin_137_scaffold_41810_5	Meg22_46_Bin_89_scaffold_17564_1	Meg22_24_Bin_129_scaffold_51315_3		BHB10-38_Bin_9_scaffold_12050_9	M3-30_Bin_374_scaffold_1398_22				ex4484_8_scaffold_2772_18	Meg19_46_Bin_228_scaffold_56074_3	Meg22_46_Bin_45_scaffold_133382_2
	Pyruvate kinase	PK, pyk	K00873	pyruvate kinase [EC:2.7.1.40]												GCA_005223185_scaffold_8_7													BHB10-2_Bin_362_scaffold_160095_3,BHB10-2_Bin_362_scaffold_276999_1	M3-10_Bin_262_scaffold_106589_4	M3-22_Bin_282_scaffold_22186_2	M3-44_Bin_119_scaffold_17727_7		LQ108M_Bin_12_scaffold_288_128		Meg22_1012_Bin_348_scaffold_95295_3		Meg22_1214_Bin_137_scaffold_29470_4	Meg22_46_Bin_89_scaffold_2971_15	Meg22_24_Bin_129_scaffold_953_20	BHB10-38_Bin_186_scaffold_103117_1		M3-30_Bin_374_scaffold_4309_26		SY70-4-3_Bin_59_scaffold_111393_1	Meg19_02_Bin_5_scaffold_151898_2		Meg19_46_Bin_228_scaffold_128154_1,Meg19_46_Bin_228_scaffold_22645_6	Meg22_46_Bin_45_scaffold_37325_2
		PKLR	K12406	pyruvate kinase isozymes R/L [EC:2.7.1.40]
Gluconeogenesis	glucose-6-phosphatase	G6PC	K01084	glucose-6-phosphatase [EC:3.1.3.9]
	fructose-1,6-bisphosphatase	FBP, fbp	K03841	fructose-1,6-bisphosphatase I [EC:3.1.3.11]	Meg22_810_Bin_217_scaffold_77804_3	Meg19_1012_Bin_198_scaffold_34536_8		Ga0186947_scaffold_1001_121	Ga0170695_scaffold_1009_5	Meg22_1416_Bin_86_scaffold_74292_3		Meg19_1012_Bin_459_scaffold_150_18	M3-44_Bin_198_scaffold_386394_3	M8-62_Bin_262_scaffold_461847_1	GCA_003599535_scaffold_6_12	GCA_005223185_scaffold_12_371	Meg22_46_Bin_11_scaffold_45538_5	Meg19_1012_Bin_119_scaffold_15073_2	Meg19_46_Bin_239_scaffold_71119_5		Meg19_46_Bin_60_scaffold_54243_3	Meg22_24_Bin_124_scaffold_15945_4	Meg22_46_Bin_213_scaffold_106150_3		M8-62_Bin_157_scaffold_34236_2	M8-62_Bin_326_scaffold_36065_4	SY70-4-11_Bin_40_scaffold_71558_2		BHB10-2_Bin_362_scaffold_226346_3	M3-10_Bin_262_scaffold_333251_2	M3-22_Bin_282_scaffold_62866_3		GCA_003820615_scaffold_84_2	LQ108M_Bin_12_scaffold_2_187
		glpX	k02446	fructose-1,6-bisphosphatase II [EC:3.1.3.11]
		glpX-SEBP	K11532	fructose-1,6-bisphosphatase II / sedoheptulose-1,7-bisphosphatase [EC:3.1.3.11 3.1.3.37]
		fbp-SEBP	K01086	fructose-1,6-bisphosphatase I / sedoheptulose-1,7-bisphosphatase [EC:3.1.3.11 3.1.3.37]
		fbp3	K04041	fructose-1,6-bisphosphatase III [EC:3.1.3.11]
		K01622	K01622	fructose 1,6-bisphosphate aldolase/phosphatase [EC:4.1.2.13 3.1.3.11]																															Meg22_46_Bin_210_scaffold_72533_1	Meg22_1012_Bin_348_scaffold_12478_8	Meg22_1214_Bin_176_scaffold_20173_7	Meg22_1214_Bin_137_scaffold_36694_5			BHB10-38_Bin_186_scaffold_40610_7	BHB10-38_Bin_9_scaffold_58106_14	M3-30_Bin_374_scaffold_2497_18				ex4484_8_scaffold_948_10	Meg19_46_Bin_228_scaffold_11332_2
	Phosphoenolpyruvate carboxykinase	E4.1.1.49, pckA	K01610	phosphoenolpyruvate carboxykinase (ATP) [EC:4.1.1.49]		Meg19_1012_Bin_198_scaffold_16588_2,Meg19_1012_Bin_198_scaffold_9858_4	GCA_002127415_scaffold_314_10		Ga0170695_scaffold_1011_13,Ga0170695_scaffold_1049_14	Meg22_1416_Bin_86_scaffold_50890_5	Meg22_46_Bin_23_scaffold_33559_2,Meg22_46_Bin_23_scaffold_73503_5	Meg19_1012_Bin_459_scaffold_18130_5,Meg19_1012_Bin_459_scaffold_284_79	M3-44_Bin_198_scaffold_158458_4	M8-62_Bin_262_scaffold_162699_2,M8-62_Bin_262_scaffold_527790_3,M8-62_Bin_262_scaffold_88655_5	GCA_003599535_scaffold_43_4,GCA_003599535_scaffold_76_7	GCA_005223185_scaffold_16_64,GCA_005223185_scaffold_9_54			Meg19_46_Bin_239_scaffold_180137_2		Meg19_46_Bin_60_scaffold_97178_2	Meg22_24_Bin_124_scaffold_112870_3	Meg22_46_Bin_213_scaffold_103422_2	M3-38_Bin_215_scaffold_225075_1	M8-62_Bin_157_scaffold_114077_5,M8-62_Bin_157_scaffold_23304_11,M8-62_Bin_157_scaffold_434458_2	M8-62_Bin_326_scaffold_531986_1			BHB10-2_Bin_362_scaffold_331138_1	M3-10_Bin_262_scaffold_306531_2	M3-22_Bin_282_scaffold_7234_3		GCA_003820615_scaffold_174_1	LQ108M_Bin_12_scaffold_9001_8	Meg22_46_Bin_210_scaffold_153819_1	Meg22_1012_Bin_348_scaffold_36844_4	Meg22_1214_Bin_176_scaffold_4537_14	Meg22_1214_Bin_137_scaffold_228187_2	Meg22_46_Bin_89_scaffold_4972_10	Meg22_24_Bin_129_scaffold_16915_5	BHB10-38_Bin_186_scaffold_247795_1	BHB10-38_Bin_9_scaffold_15739_14	M3-30_Bin_374_scaffold_8642_3			Meg19_02_Bin_5_scaffold_157720_3		Meg19_46_Bin_228_scaffold_219559_1	Meg22_46_Bin_45_scaffold_283146_3,Meg22_46_Bin_45_scaffold_55856_3
		E4.1.1.32, pckA, PCK	K01596	phosphoenolpyruvate carboxykinase (GTP) [EC:4.1.1.32]													Meg22_46_Bin_11_scaffold_61445_2	Meg19_1012_Bin_119_scaffold_6444_13										AB_03_Bin_160_scaffold_29135_4				M3-44_Bin_119_scaffold_978_1
TCA Cycle	citrate synthase	CS, gltA	K01647	citrate synthase [EC:2.3.3.1]		Meg19_1012_Bin_198_scaffold_20316_2	GCA_002127415_scaffold_122_7		Ga0170695_scaffold_1142_1	Meg22_1416_Bin_86_scaffold_126508_3	Meg22_46_Bin_23_scaffold_219312_3	Meg19_1012_Bin_459_scaffold_17120_22	M3-44_Bin_198_scaffold_256924_2,M3-44_Bin_198_scaffold_124064_4	M8-62_Bin_262_scaffold_9110_11	GCA_003599535_scaffold_40_25	GCA_005223185_scaffold_13_7,GCA_005223185_scaffold_13_8,GCA_005223185_scaffold_1_127	Meg22_46_Bin_11_scaffold_13483_7	Meg19_1012_Bin_119_scaffold_13224_5						M3-38_Bin_215_scaffold_102777_2	M8-62_Bin_157_scaffold_2843_14	M8-62_Bin_326_scaffold_186366_1,M8-62_Bin_326_scaffold_44420_3,M8-62_Bin_326_scaffold_92002_3	SY70-4-11_Bin_40_scaffold_93908_1		BHB10-2_Bin_362_scaffold_341255_2	M3-10_Bin_262_scaffold_193679_2,M3-10_Bin_262_scaffold_21130_4	M3-22_Bin_282_scaffold_12133_10,M3-22_Bin_282_scaffold_32699_6	M3-44_Bin_119_scaffold_1127_9		LQ108M_Bin_12_scaffold_12_131,LQ108M_Bin_12_scaffold_13532_7	Meg22_46_Bin_210_scaffold_103055_2	Meg22_1012_Bin_348_scaffold_9364_13	Meg22_1214_Bin_176_scaffold_63743_4,Meg22_1214_Bin_176_scaffold_74496_1	Meg22_1214_Bin_137_scaffold_17330_9		Meg22_24_Bin_129_scaffold_248418_1	BHB10-38_Bin_186_scaffold_265886_1		M3-30_Bin_374_scaffold_1908_5					Meg19_46_Bin_228_scaffold_111226_4
		E2.3.3.3	K05942	citrate (Re)-synthase									M3-44_Bin_198_scaffold_329171_1
	Aconitase	ACO, acnA	K01681	aconitate hydratase [EC:4.2.1.3]		Meg19_1012_Bin_198_scaffold_8718_20	GCA_002127415_scaffold_57_6	Ga0186947_scaffold_1001_68	Ga0170695_scaffold_1051_3	Meg22_1416_Bin_86_scaffold_124715_1,Meg22_1416_Bin_86_scaffold_47602_2		Meg19_1012_Bin_459_scaffold_120_86	M3-44_Bin_198_scaffold_150274_1,M3-44_Bin_198_scaffold_228514_1	M8-62_Bin_262_scaffold_21590_8,M8-62_Bin_262_scaffold_48356_2	GCA_003599535_scaffold_38_12,GCA_003599535_scaffold_93_2	GCA_005223185_scaffold_7_432	Meg22_46_Bin_11_scaffold_150549_7	Meg19_1012_Bin_119_scaffold_8570_12	Meg19_46_Bin_239_scaffold_13688_8	Meg22_02_Bin_84_scaffold_62221_2			Meg22_46_Bin_213_scaffold_32052_7	M3-38_Bin_215_scaffold_82508_2				AB_03_Bin_160_scaffold_56069_2	BHB10-2_Bin_362_scaffold_51000_11			M3-44_Bin_119_scaffold_5559_26	GCA_003820615_scaffold_18_2,GCA_003820615_scaffold_457_1	LQ108M_Bin_12_scaffold_29_56	Meg22_46_Bin_210_scaffold_137950_1	Meg22_1012_Bin_348_scaffold_34234_2		Meg22_1214_Bin_137_scaffold_33274_4	Meg22_46_Bin_89_scaffold_20128_9	Meg22_24_Bin_129_scaffold_80603_3		BHB10-38_Bin_9_scaffold_36213_1	M3-30_Bin_374_scaffold_4701_12		SY70-4-3_Bin_59_scaffold_123727_1
		acnB	K01682	aconitate hydratase 2 / 2-methylisocitrate dehydratase [EC:4.2.1.3 4.2.1.99]
	Isocitrate dehydrogenase	IDH1, IDH2, icd	K00031	isocitrate dehydrogenase [EC:1.1.1.42]		Meg19_1012_Bin_198_scaffold_3365_6	GCA_002127415_scaffold_33_9		Ga0170695_scaffold_1011_3			Meg19_1012_Bin_459_scaffold_120_92		M8-62_Bin_262_scaffold_21590_7	GCA_003599535_scaffold_93_7	GCA_005223185_scaffold_7_430		Meg19_1012_Bin_119_scaffold_9511_17	Meg19_46_Bin_239_scaffold_6977_4	Meg22_02_Bin_84_scaffold_69225_3	Meg19_46_Bin_60_scaffold_106458_2			M3-38_Bin_215_scaffold_221175_2	M8-62_Bin_157_scaffold_11712_6	M8-62_Bin_326_scaffold_187924_3		AB_03_Bin_160_scaffold_59393_2	BHB10-2_Bin_362_scaffold_19438_11	M3-10_Bin_262_scaffold_309811_3	M3-22_Bin_282_scaffold_94063_2	M3-44_Bin_119_scaffold_13247_12,M3-44_Bin_119_scaffold_498093_4	GCA_003820615_scaffold_442_2	LQ108M_Bin_12_scaffold_29_162					Meg22_46_Bin_89_scaffold_105484_1					SY70-4-3_Bin_44_scaffold_8724_2
		IDH3	K00030	isocitrate dehydrogenase (NAD+) [EC:1.1.1.41]		Meg19_1012_Bin_198_scaffold_9435_8	GCA_002127415_scaffold_40_10				Meg22_46_Bin_23_scaffold_290284_2	Meg19_1012_Bin_459_scaffold_150_31	M3-44_Bin_198_scaffold_199231_1	M8-62_Bin_262_scaffold_66062_5	GCA_003599535_scaffold_6_4	GCA_005223185_scaffold_12_378				Meg22_02_Bin_84_scaffold_205554_2							SY70-4-11_Bin_40_scaffold_23230_2			M3-10_Bin_262_scaffold_100218_3	M3-22_Bin_282_scaffold_21101_5	M3-44_Bin_119_scaffold_8912_5			Meg22_46_Bin_210_scaffold_118506_3			Meg22_1214_Bin_137_scaffold_45601_4		Meg22_24_Bin_129_scaffold_28477_3	BHB10-38_Bin_186_scaffold_28004_4,BHB10-38_Bin_186_scaffold_68907_1	BHB10-38_Bin_9_scaffold_21783_3	M3-30_Bin_374_scaffold_381_44	SY70-4-3_Bin_44_scaffold_25152_2	SY70-4-3_Bin_59_scaffold_42024_2				Meg22_46_Bin_45_scaffold_16987_8,Meg22_46_Bin_45_scaffold_205972_3
		HICDH	K17753	isocitrate--homoisocitrate dehydrogenase [EC:1.1.1.286]
	oxoglutarate dehydrogenase complex	OGDH, sucA	K00164	2-oxoglutarate dehydrogenase E1 component [EC:1.2.4.2]																												M3-44_Bin_119_scaffold_7160_7		LQ108M_Bin_12_scaffold_17_61
		kgd	K01616	multifunctional 2-oxoglutarate metabolism enzyme [EC:2.2.1.5 4.1.1.71 1.2.4.2 2.3.1.61]
		DLST, sucB	K00658	2-oxoglutarate dehydrogenase E2 component (dihydrolipoamide succinyltransferase) [EC:2.3.1.61]										M8-62_Bin_262_scaffold_65955_3														AB_03_Bin_160_scaffold_104675_4	BHB10-2_Bin_362_scaffold_151435_3	M3-10_Bin_262_scaffold_68548_2	M3-22_Bin_282_scaffold_9829_4	M3-44_Bin_119_scaffold_3859_23	GCA_003820615_scaffold_744_1	LQ108M_Bin_12_scaffold_75_120
		DLD, lpd, pdhD	K00382	dihydrolipoamide dehydrogenase [EC:1.8.1.4]		Meg19_1012_Bin_198_scaffold_242_53,Meg19_1012_Bin_198_scaffold_9858_7	GCA_002127415_scaffold_357_3	Ga0186947_scaffold_1044_6	Ga0170695_scaffold_1004_21		Meg22_46_Bin_23_scaffold_265305_1	Meg19_1012_Bin_459_scaffold_2527_9,Meg19_1012_Bin_459_scaffold_7079_15		M8-62_Bin_262_scaffold_65955_9	GCA_003599535_scaffold_2_84	GCA_005223185_scaffold_6_27,GCA_005223185_scaffold_7_77	Meg22_46_Bin_11_scaffold_13483_8	Meg19_1012_Bin_119_scaffold_13224_4,Meg19_1012_Bin_119_scaffold_8212_5	Meg19_46_Bin_239_scaffold_120758_3,Meg19_46_Bin_239_scaffold_92487_10		Meg19_46_Bin_60_scaffold_46929_1	Meg22_24_Bin_124_scaffold_177418_2,Meg22_24_Bin_124_scaffold_226376_3			M8-62_Bin_157_scaffold_101509_4,M8-62_Bin_157_scaffold_2843_16		SY70-4-11_Bin_40_scaffold_27664_1		BHB10-2_Bin_362_scaffold_81027_7	M3-10_Bin_262_scaffold_68548_5	M3-22_Bin_282_scaffold_9829_7	M3-44_Bin_119_scaffold_3859_26	GCA_003820615_scaffold_744_2	LQ108M_Bin_12_scaffold_75_121		Meg22_1012_Bin_348_scaffold_72704_5	Meg22_1214_Bin_176_scaffold_25418_12	Meg22_1214_Bin_137_scaffold_20273_12	Meg22_46_Bin_89_scaffold_4642_5	Meg22_24_Bin_129_scaffold_93407_2		BHB10-38_Bin_9_scaffold_128692_3	M3-30_Bin_374_scaffold_1200_5	SY70-4-3_Bin_44_scaffold_36494_2	SY70-4-3_Bin_59_scaffold_40603_2	Meg19_02_Bin_5_scaffold_60918_3		Meg19_46_Bin_228_scaffold_12362_8	Meg22_46_Bin_45_scaffold_230053_1
		korA, oorA, oforA	K00174	2-oxoglutarate/2-oxoacid ferredoxin oxidoreductase subunit alpha [EC:1.2.7.3 1.2.7.11]	Meg22_810_Bin_217_scaffold_108885_1,Meg22_810_Bin_217_scaffold_61192_5	Meg19_1012_Bin_198_scaffold_1620_39,Meg19_1012_Bin_198_scaffold_8718_5	GCA_002127415_scaffold_353_7,GCA_002127415_scaffold_53_7	Ga0186947_scaffold_1001_85		Meg22_1416_Bin_86_scaffold_76829_2,Meg22_1416_Bin_86_scaffold_81056_5	Meg22_46_Bin_23_scaffold_206149_4,Meg22_46_Bin_23_scaffold_61638_4	Meg19_1012_Bin_459_scaffold_311_14,Meg19_1012_Bin_459_scaffold_5327_19		M8-62_Bin_262_scaffold_19257_8,M8-62_Bin_262_scaffold_69755_7	GCA_003599535_scaffold_10_7	GCA_005223185_scaffold_4_107,GCA_005223185_scaffold_7_408	Meg22_46_Bin_11_scaffold_211830_3,Meg22_46_Bin_11_scaffold_220031_1	Meg19_1012_Bin_119_scaffold_12288_20,Meg19_1012_Bin_119_scaffold_15227_4,Meg19_1012_Bin_119_scaffold_4196_21,Meg19_1012_Bin_119_scaffold_6736_14	Meg19_46_Bin_239_scaffold_33496_3,Meg19_46_Bin_239_scaffold_90484_3	Meg22_02_Bin_84_scaffold_168544_2,Meg22_02_Bin_84_scaffold_198526_4,Meg22_02_Bin_84_scaffold_83941_2	Meg19_46_Bin_60_scaffold_105872_4,Meg19_46_Bin_60_scaffold_33289_3,Meg19_46_Bin_60_scaffold_8558_3	Meg22_24_Bin_124_scaffold_64627_4,Meg22_24_Bin_124_scaffold_9078_2	Meg22_46_Bin_213_scaffold_16344_8	M3-38_Bin_215_scaffold_101020_7,M3-38_Bin_215_scaffold_160603_5,M3-38_Bin_215_scaffold_185581_2,M3-38_Bin_215_scaffold_406340_3	M8-62_Bin_157_scaffold_145334_1,M8-62_Bin_157_scaffold_14724_9,M8-62_Bin_157_scaffold_18940_3,M8-62_Bin_157_scaffold_20527_11	M8-62_Bin_326_scaffold_155453_3,M8-62_Bin_326_scaffold_211431_5,M8-62_Bin_326_scaffold_316419_2,M8-62_Bin_326_scaffold_70105_3	SY70-4-11_Bin_40_scaffold_10799_11,SY70-4-11_Bin_40_scaffold_82115_1	AB_03_Bin_160_scaffold_10083_10,AB_03_Bin_160_scaffold_6058_4,AB_03_Bin_160_scaffold_75735_2	BHB10-2_Bin_362_scaffold_12609_19,BHB10-2_Bin_362_scaffold_357628_2,BHB10-2_Bin_362_scaffold_85424_5	M3-10_Bin_262_scaffold_50235_3	M3-22_Bin_282_scaffold_47347_5	M3-44_Bin_119_scaffold_822_6,M3-44_Bin_119_scaffold_3079_49,M3-44_Bin_119_scaffold_40472_2	GCA_003820615_scaffold_494_3,GCA_003820615_scaffold_682_3	LQ108M_Bin_12_scaffold_12_114,LQ108M_Bin_12_scaffold_17_53	Meg22_46_Bin_210_scaffold_123995_1,Meg22_46_Bin_210_scaffold_50305_1,Meg22_46_Bin_210_scaffold_86907_1	Meg22_1012_Bin_348_scaffold_101479_2,Meg22_1012_Bin_348_scaffold_42958_5,Meg22_1012_Bin_348_scaffold_58834_3	Meg22_1214_Bin_176_scaffold_13089_3,Meg22_1214_Bin_176_scaffold_25418_4,Meg22_1214_Bin_176_scaffold_3507_11	Meg22_1214_Bin_137_scaffold_20273_3,Meg22_1214_Bin_137_scaffold_95843_4	Meg22_46_Bin_89_scaffold_128851_5,Meg22_46_Bin_89_scaffold_23233_10,Meg22_46_Bin_89_scaffold_4642_14,Meg22_46_Bin_89_scaffold_9959_12	Meg22_24_Bin_129_scaffold_173866_1,Meg22_24_Bin_129_scaffold_5421_8,Meg22_24_Bin_129_scaffold_55078_1,Meg22_24_Bin_129_scaffold_8661_5	BHB10-38_Bin_186_scaffold_123648_5,BHB10-38_Bin_186_scaffold_25401_10	BHB10-38_Bin_9_scaffold_273932_2,BHB10-38_Bin_9_scaffold_308987_2,BHB10-38_Bin_9_scaffold_41635_4,BHB10-38_Bin_9_scaffold_44076_5,BHB10-38_Bin_9_scaffold_63548_6	M3-30_Bin_374_scaffold_1200_30,M3-30_Bin_374_scaffold_177905_3,M3-30_Bin_374_scaffold_18230_11,M3-30_Bin_374_scaffold_24987_10,M3-30_Bin_374_scaffold_24987_6,M3-30_Bin_374_scaffold_471_57	SY70-4-3_Bin_44_scaffold_5128_4	SY70-4-3_Bin_59_scaffold_72507_2,SY70-4-3_Bin_59_scaffold_89033_2	Meg19_02_Bin_5_scaffold_117969_4	ex4484_8_scaffold_2768_12,ex4484_8_scaffold_8976_9	Meg19_46_Bin_228_scaffold_249185_1,Meg19_46_Bin_228_scaffold_151294_4,Meg19_46_Bin_228_scaffold_31990_4,Meg19_46_Bin_228_scaffold_85097_1	Meg22_46_Bin_45_scaffold_6282_11,Meg22_46_Bin_45_scaffold_66941_4,Meg22_46_Bin_45_scaffold_76902_2,Meg22_46_Bin_45_scaffold_999_9
		korB, oorB, oforB	K00175	2-oxoglutarate/2-oxoacid ferredoxin oxidoreductase subunit beta [EC:1.2.7.3 1.2.7.11]	Meg22_810_Bin_217_scaffold_61192_4	Meg19_1012_Bin_198_scaffold_1620_38,Meg19_1012_Bin_198_scaffold_8718_4	GCA_002127415_scaffold_353_6,GCA_002127415_scaffold_53_8	Ga0186947_scaffold_1001_86		Meg22_1416_Bin_86_scaffold_76829_3,Meg22_1416_Bin_86_scaffold_81056_4	Meg22_46_Bin_23_scaffold_61638_5	Meg19_1012_Bin_459_scaffold_311_13,Meg19_1012_Bin_459_scaffold_5327_18	M3-44_Bin_198_scaffold_291547_2,M3-44_Bin_198_scaffold_334835_3	M8-62_Bin_262_scaffold_103744_1,M8-62_Bin_262_scaffold_19257_5	GCA_003599535_scaffold_10_8	GCA_005223185_scaffold_4_106,GCA_005223185_scaffold_7_407	Meg22_46_Bin_11_scaffold_251848_1	Meg19_1012_Bin_119_scaffold_12288_19,Meg19_1012_Bin_119_scaffold_15227_3,Meg19_1012_Bin_119_scaffold_4196_20,Meg19_1012_Bin_119_scaffold_6736_13	Meg19_46_Bin_239_scaffold_149168_1,Meg19_46_Bin_239_scaffold_33496_2,Meg19_46_Bin_239_scaffold_90484_2	Meg22_02_Bin_84_scaffold_168544_3,Meg22_02_Bin_84_scaffold_83941_1	Meg19_46_Bin_60_scaffold_105872_5,Meg19_46_Bin_60_scaffold_190460_2,Meg19_46_Bin_60_scaffold_33289_4,Meg19_46_Bin_60_scaffold_8558_4	Meg22_24_Bin_124_scaffold_37721_2,Meg22_24_Bin_124_scaffold_64627_3,Meg22_24_Bin_124_scaffold_9078_3	Meg22_46_Bin_213_scaffold_16344_9,Meg22_46_Bin_213_scaffold_54099_5	M3-38_Bin_215_scaffold_160603_6,M3-38_Bin_215_scaffold_404004_2,M3-38_Bin_215_scaffold_406340_4	M8-62_Bin_157_scaffold_100156_1,M8-62_Bin_157_scaffold_14724_8,M8-62_Bin_157_scaffold_17371_2,M8-62_Bin_157_scaffold_18940_2,M8-62_Bin_157_scaffold_20527_9	M8-62_Bin_326_scaffold_155453_2,M8-62_Bin_326_scaffold_211431_6,M8-62_Bin_326_scaffold_246466_2,M8-62_Bin_326_scaffold_261833_2,M8-62_Bin_326_scaffold_70105_2	SY70-4-11_Bin_40_scaffold_10799_12,SY70-4-11_Bin_40_scaffold_87366_1	AB_03_Bin_160_scaffold_34572_1,AB_03_Bin_160_scaffold_6058_5	BHB10-2_Bin_362_scaffold_12609_18,BHB10-2_Bin_362_scaffold_357628_1,BHB10-2_Bin_362_scaffold_85424_4	M3-10_Bin_262_scaffold_50235_2	M3-22_Bin_282_scaffold_256353_2,M3-22_Bin_282_scaffold_47347_4,M3-22_Bin_282_scaffold_7891_15	M3-44_Bin_119_scaffold_3079_48,M3-44_Bin_119_scaffold_40472_3	GCA_003820615_scaffold_154_3,GCA_003820615_scaffold_329_2,GCA_003820615_scaffold_494_4,GCA_003820615_scaffold_682_4	LQ108M_Bin_12_scaffold_12_113,LQ108M_Bin_12_scaffold_17_52	Meg22_46_Bin_210_scaffold_123995_2,Meg22_46_Bin_210_scaffold_199740_2,Meg22_46_Bin_210_scaffold_50305_2	Meg22_1012_Bin_348_scaffold_101479_3,Meg22_1012_Bin_348_scaffold_42958_4,Meg22_1012_Bin_348_scaffold_58834_4	Meg22_1214_Bin_176_scaffold_13089_2,Meg22_1214_Bin_176_scaffold_25418_3,Meg22_1214_Bin_176_scaffold_3507_12	Meg22_1214_Bin_137_scaffold_95843_3	Meg22_46_Bin_89_scaffold_4642_15,Meg22_46_Bin_89_scaffold_128851_4,Meg22_46_Bin_89_scaffold_23233_9,Meg22_46_Bin_89_scaffold_9959_11	Meg22_24_Bin_129_scaffold_8661_4,Meg22_24_Bin_129_scaffold_21131_7,Meg22_24_Bin_129_scaffold_5421_7	BHB10-38_Bin_186_scaffold_108296_4,BHB10-38_Bin_186_scaffold_123648_4	BHB10-38_Bin_9_scaffold_273932_3,BHB10-38_Bin_9_scaffold_308987_1,BHB10-38_Bin_9_scaffold_41635_3,BHB10-38_Bin_9_scaffold_44076_6,BHB10-38_Bin_9_scaffold_49937_2,BHB10-38_Bin_9_scaffold_63548_12,BHB10-38_Bin_9_scaffold_63548_7	M3-30_Bin_374_scaffold_1200_31,M3-30_Bin_374_scaffold_18230_10,M3-30_Bin_374_scaffold_24987_11,M3-30_Bin_374_scaffold_24987_7,M3-30_Bin_374_scaffold_471_58,M3-30_Bin_374_scaffold_5418_31	SY70-4-3_Bin_44_scaffold_5128_3		Meg19_02_Bin_5_scaffold_117969_3,Meg19_02_Bin_5_scaffold_10650_2,Meg19_02_Bin_5_scaffold_669924_2	ex4484_8_scaffold_2768_11,ex4484_8_scaffold_8976_8	Meg19_46_Bin_228_scaffold_151294_3,Meg19_46_Bin_228_scaffold_193401_2,Meg19_46_Bin_228_scaffold_31990_5,Meg19_46_Bin_228_scaffold_85097_2	Meg22_46_Bin_45_scaffold_999_8,Meg22_46_Bin_45_scaffold_23419_11,Meg22_46_Bin_45_scaffold_6282_10,Meg22_46_Bin_45_scaffold_66941_3
	succinyl-CoA synthetase	LSC1	K01899	succinyl-CoA synthetase alpha subunit [EC:6.2.1.4 6.2.1.5]
		LSC2	K01900	succinyl-CoA synthetase beta subunit [EC:6.2.1.4 6.2.1.5]
		sucD	K01902	succinyl-CoA synthetase alpha subunit [EC:6.2.1.5]		Meg19_1012_Bin_198_scaffold_8718_7	GCA_002127415_scaffold_353_9	Ga0186947_scaffold_1001_83	Ga0170695_scaffold_1123_3		Meg22_46_Bin_23_scaffold_61638_2	Meg19_1012_Bin_459_scaffold_434_23,Meg19_1012_Bin_459_scaffold_5327_21	M3-44_Bin_198_scaffold_201462_3	M8-62_Bin_262_scaffold_6800_9,M8-62_Bin_262_scaffold_69755_5	GCA_003599535_scaffold_10_5,GCA_003599535_scaffold_45_9	GCA_005223185_scaffold_14_47,GCA_005223185_scaffold_7_410		Meg19_1012_Bin_119_scaffold_4522_9	Meg19_46_Bin_239_scaffold_126551_3	Meg22_02_Bin_84_scaffold_17066_4		Meg22_24_Bin_124_scaffold_8566_1	Meg22_46_Bin_213_scaffold_19485_22		M8-62_Bin_157_scaffold_45289_9,M8-62_Bin_157_scaffold_67223_9		SY70-4-11_Bin_40_scaffold_1663_9	AB_03_Bin_160_scaffold_26105_2	BHB10-2_Bin_362_scaffold_387310_3			M3-44_Bin_119_scaffold_1092_24	GCA_003820615_scaffold_386_10	LQ108M_Bin_12_scaffold_29_174		Meg22_1012_Bin_348_scaffold_26056_2	Meg22_1214_Bin_176_scaffold_109913_4		Meg22_46_Bin_89_scaffold_17373_17	Meg22_24_Bin_129_scaffold_11766_8		BHB10-38_Bin_9_scaffold_40736_9				Meg19_02_Bin_5_scaffold_173627_3		Meg19_46_Bin_228_scaffold_222749_2	Meg22_46_Bin_45_scaffold_23419_7
		sucC	K01903	succinyl-CoA synthetase beta subunit [EC:6.2.1.5]	Meg22_810_Bin_217_scaffold_211874_2	Meg19_1012_Bin_198_scaffold_8718_8	GCA_002127415_scaffold_347_1	Ga0186947_scaffold_1001_79	Ga0170695_scaffold_1123_2			Meg19_1012_Bin_459_scaffold_5327_22	M3-44_Bin_198_scaffold_231086_3	M8-62_Bin_262_scaffold_151043_2,M8-62_Bin_262_scaffold_69755_4	GCA_003599535_scaffold_10_4	GCA_005223185_scaffold_7_413		Meg19_1012_Bin_119_scaffold_4522_8	Meg19_46_Bin_239_scaffold_126551_2				Meg22_46_Bin_213_scaffold_19485_23		M8-62_Bin_157_scaffold_46639_2		SY70-4-11_Bin_40_scaffold_1663_10		BHB10-2_Bin_362_scaffold_387310_2	M3-10_Bin_262_scaffold_70174_1		M3-44_Bin_119_scaffold_1092_25		LQ108M_Bin_12_scaffold_29_173			Meg22_1214_Bin_176_scaffold_109913_3		Meg22_46_Bin_89_scaffold_17373_16	Meg22_24_Bin_129_scaffold_11766_7		BHB10-38_Bin_9_scaffold_40736_8				Meg19_02_Bin_5_scaffold_173627_2			Meg22_46_Bin_45_scaffold_23419_6
	succinate dehydrogenase / fumarate reductase	frdA	K00244	fumarate reductase flavoprotein subunit [EC:1.3.5.4]																						M8-62_Bin_326_scaffold_44420_7								LQ108M_Bin_12_scaffold_140_81
		frdB	K00245	fumarate reductase iron-sulfur subunit [EC:1.3.5.4]	Meg22_810_Bin_217_scaffold_14846_7		GCA_002127415_scaffold_52_3												Meg19_46_Bin_239_scaffold_27970_2															LQ108M_Bin_12_scaffold_140_80							BHB10-38_Bin_186_scaffold_259620_3
		frdC	K00246	fumarate reductase subunit C																														LQ108M_Bin_12_scaffold_140_82
		frdD	K00247	fumarate reductase subunit D
		sdhA, frdA	K00239	succinate dehydrogenase / fumarate reductase, flavoprotein subunit [EC:1.3.5.1 1.3.5.4]	Meg22_810_Bin_217_scaffold_14846_10	Meg19_1012_Bin_198_scaffold_2058_22	GCA_002127415_scaffold_52_6	Ga0186947_scaffold_1044_20	Ga0170695_scaffold_1007_3		Meg22_46_Bin_23_scaffold_134886_3	Meg19_1012_Bin_459_scaffold_856_4		M8-62_Bin_262_scaffold_437399_2	GCA_003599535_scaffold_21_9	GCA_005223185_scaffold_14_18		Meg19_1012_Bin_119_scaffold_2247_8	Meg19_46_Bin_239_scaffold_27970_5	Meg22_02_Bin_84_scaffold_204917_1		Meg22_24_Bin_124_scaffold_3726_12	Meg22_46_Bin_213_scaffold_4034_25		M8-62_Bin_157_scaffold_16284_8,M8-62_Bin_157_scaffold_20424_7						M3-22_Bin_282_scaffold_37232_3	M3-44_Bin_119_scaffold_1742_48	GCA_003820615_scaffold_510_5		Meg22_46_Bin_210_scaffold_29940_4	Meg22_1012_Bin_348_scaffold_167057_1	Meg22_1214_Bin_176_scaffold_8385_13			Meg22_24_Bin_129_scaffold_63099_1		BHB10-38_Bin_9_scaffold_32558_5			SY70-4-3_Bin_59_scaffold_67890_3				Meg22_46_Bin_45_scaffold_40131_6,Meg22_46_Bin_45_scaffold_52632_3
		sdhB, frdB	K00240	succinate dehydrogenase / fumarate reductase, iron-sulfur subunit [EC:1.3.5.1 1.3.5.4]	Meg22_810_Bin_217_scaffold_14846_7	Meg19_1012_Bin_198_scaffold_2058_21	GCA_002127415_scaffold_52_3	Ga0186947_scaffold_1050_2	Ga0170695_scaffold_1007_2		Meg22_46_Bin_23_scaffold_134886_4	Meg19_1012_Bin_459_scaffold_856_5		M8-62_Bin_262_scaffold_437399_3	GCA_003599535_scaffold_21_8	GCA_005223185_scaffold_14_19	Meg22_46_Bin_11_scaffold_133598_4	Meg19_1012_Bin_119_scaffold_2247_5	Meg19_46_Bin_239_scaffold_27970_2	Meg22_02_Bin_84_scaffold_15826_8	Meg19_46_Bin_60_scaffold_255455_1	Meg22_24_Bin_124_scaffold_3726_9	Meg22_46_Bin_213_scaffold_4034_22		M8-62_Bin_157_scaffold_16284_9,M8-62_Bin_157_scaffold_20424_10	M8-62_Bin_326_scaffold_44420_4	SY70-4-11_Bin_40_scaffold_5896_3		BHB10-2_Bin_362_scaffold_182092_9	M3-10_Bin_262_scaffold_239217_2	M3-22_Bin_282_scaffold_37232_4	M3-44_Bin_119_scaffold_1742_49	GCA_003820615_scaffold_837_3	LQ108M_Bin_12_scaffold_140_80	Meg22_46_Bin_210_scaffold_29940_5		Meg22_1214_Bin_176_scaffold_8385_14		Meg22_46_Bin_89_scaffold_63347_2	Meg22_24_Bin_129_scaffold_63099_2	BHB10-38_Bin_186_scaffold_187407_2,BHB10-38_Bin_186_scaffold_259620_3	BHB10-38_Bin_9_scaffold_32558_6	M3-30_Bin_374_scaffold_2903_1		SY70-4-3_Bin_59_scaffold_55774_4,SY70-4-3_Bin_59_scaffold_67890_2	Meg19_02_Bin_5_scaffold_269344_4		Meg19_46_Bin_228_scaffold_15083_2,Meg19_46_Bin_228_scaffold_234776_1	Meg22_46_Bin_45_scaffold_40131_7,Meg22_46_Bin_45_scaffold_52632_2
		sdhC, frdC	K00241	succinate dehydrogenase / fumarate reductase, cytochrome b subunit	Meg22_810_Bin_217_scaffold_14846_9		GCA_002127415_scaffold_52_5		Ga0170695_scaffold_1007_5	Meg22_1416_Bin_86_scaffold_131723_2	Meg22_46_Bin_23_scaffold_134886_1				GCA_003599535_scaffold_21_11	GCA_005223185_scaffold_14_16	Meg22_46_Bin_11_scaffold_133598_2	Meg19_1012_Bin_119_scaffold_2247_7	Meg19_46_Bin_239_scaffold_66897_1,Meg19_46_Bin_239_scaffold_27970_4		Meg19_46_Bin_60_scaffold_255455_3	Meg22_24_Bin_124_scaffold_3726_11	Meg22_46_Bin_213_scaffold_4034_24		M8-62_Bin_157_scaffold_16284_6		SY70-4-11_Bin_40_scaffold_6603_2					M3-44_Bin_119_scaffold_1742_47	GCA_003820615_scaffold_510_4		Meg22_46_Bin_210_scaffold_29940_2	Meg22_1012_Bin_348_scaffold_178199_3										Meg19_02_Bin_5_scaffold_195459_3			Meg22_46_Bin_45_scaffold_40131_4
		sdhD, frdD	K00242	succinate dehydrogenase / fumarate reductase, membrane anchor subunit		Meg19_1012_Bin_198_scaffold_2058_23		Ga0186947_scaffold_1044_18,Ga0186947_scaffold_1044_19	Ga0170695_scaffold_1007_4	Meg22_1416_Bin_86_scaffold_131723_1	Meg22_46_Bin_23_scaffold_134886_2	Meg19_1012_Bin_459_scaffold_856_3			GCA_003599535_scaffold_21_10	GCA_005223185_scaffold_14_17									M8-62_Bin_157_scaffold_16284_7										Meg22_46_Bin_210_scaffold_29940_2,Meg22_46_Bin_210_scaffold_29940_3											Meg19_02_Bin_5_scaffold_195459_2			Meg22_46_Bin_45_scaffold_40131_5
		sdhD, frdD	K18859	succinate dehydrogenase / fumarate reductase, subunit D
		sdhD, frdD	K18860	putative succinate dehydrogenase / fumarate reductase, subunit D
		SDHA, SDH1	K00234	succinate dehydrogenase (ubiquinone) flavoprotein subunit [EC:1.3.5.1]
		SDHB, SDH2	K00235	succinate dehydrogenase (ubiquinone) iron-sulfur subunit [EC:1.3.5.1]
		SDHC, SDH3	K00236	succinate dehydrogenase (ubiquinone) cytochrome b560 subunit
		SDHD, SDH3	K00237	succinate dehydrogenase (ubiquinone) membrane anchor subunit
	fumarase	E4.2.1.2A, fumA, fumB	K01676	fumarate hydratase, class I [EC:4.2.1.2]																								AB_03_Bin_160_scaffold_35712_1					GCA_003820615_scaffold_283_2	LQ108M_Bin_12_scaffold_12_639	Meg22_46_Bin_210_scaffold_132245_2													Meg19_46_Bin_228_scaffold_31388_3	Meg22_46_Bin_45_scaffold_69778_3
		E4.2.1.2AA, fumA	K01677	fumarate hydratase subunit alpha [EC:4.2.1.2]			GCA_002127415_scaffold_70_5					Meg19_1012_Bin_459_scaffold_10849_15			GCA_003599535_scaffold_140_7,GCA_003599535_scaffold_73_2	GCA_005223185_scaffold_18_145	Meg22_46_Bin_11_scaffold_17215_2	Meg19_1012_Bin_119_scaffold_16320_6	Meg19_46_Bin_239_scaffold_22731_3		Meg19_46_Bin_60_scaffold_42863_3		Meg22_46_Bin_213_scaffold_140423_4	M3-38_Bin_215_scaffold_45054_9	M8-62_Bin_157_scaffold_84411_1	M8-62_Bin_326_scaffold_122691_3	SY70-4-11_Bin_40_scaffold_45226_3									Meg22_1012_Bin_348_scaffold_75030_2	Meg22_1214_Bin_176_scaffold_5401_6	Meg22_1214_Bin_137_scaffold_350783_3	Meg22_46_Bin_89_scaffold_23992_7	Meg22_24_Bin_129_scaffold_23685_6	BHB10-38_Bin_186_scaffold_203772_2,BHB10-38_Bin_186_scaffold_325821_3		M3-30_Bin_374_scaffold_41724_6
		E4.2.1.2AB, fumB	K01678	fumarate hydratase subunit beta [EC:4.2.1.2]			GCA_002127415_scaffold_119_8			Meg22_1416_Bin_86_scaffold_131723_4		Meg19_1012_Bin_459_scaffold_6264_4	M3-44_Bin_198_scaffold_201747_2	M8-62_Bin_262_scaffold_379454_2	GCA_003599535_scaffold_21_15	GCA_005223185_scaffold_14_9	Meg22_46_Bin_11_scaffold_17215_3	Meg19_1012_Bin_119_scaffold_16320_5	Meg19_46_Bin_239_scaffold_22731_4	Meg22_02_Bin_84_scaffold_210612_2	Meg19_46_Bin_60_scaffold_42863_4		Meg22_46_Bin_213_scaffold_140423_5	M3-38_Bin_215_scaffold_45054_8	M8-62_Bin_157_scaffold_84411_2	M8-62_Bin_326_scaffold_122691_4	SY70-4-11_Bin_40_scaffold_45226_2	AB_03_Bin_160_scaffold_35712_2					GCA_003820615_scaffold_283_3	LQ108M_Bin_12_scaffold_12_640	Meg22_46_Bin_210_scaffold_132245_3	Meg22_1012_Bin_348_scaffold_75030_3	Meg22_1214_Bin_176_scaffold_5401_7	Meg22_1214_Bin_137_scaffold_350783_2	Meg22_46_Bin_89_scaffold_23992_6	Meg22_24_Bin_129_scaffold_23685_5			M3-30_Bin_374_scaffold_41724_7	SY70-4-3_Bin_44_scaffold_16423_6		Meg19_02_Bin_5_scaffold_172226_4		Meg19_46_Bin_228_scaffold_31388_4	Meg22_46_Bin_45_scaffold_69778_2
		E4.2.1.2B, fumC, FH	K01679	fumarate hydratase, class II [EC:4.2.1.2]	Meg22_810_Bin_217_scaffold_15201_13	Meg19_1012_Bin_198_scaffold_9220_1							M3-44_Bin_198_scaffold_65445_4	M8-62_Bin_262_scaffold_21576_14	GCA_003599535_scaffold_38_18					Meg22_02_Bin_84_scaffold_64292_3					M8-62_Bin_157_scaffold_246291_3	M8-62_Bin_326_scaffold_122691_2				M3-10_Bin_262_scaffold_63733_2	M3-22_Bin_282_scaffold_26467_2	M3-44_Bin_119_scaffold_20111_9				Meg22_1012_Bin_348_scaffold_51397_1									SY70-4-3_Bin_59_scaffold_55774_3			Meg19_46_Bin_228_scaffold_15083_3	Meg22_46_Bin_45_scaffold_52632_1
		fumD	K01675	fumarate hydratase D [EC:4.2.1.2]
		fumE	K01774	fumarate hydratase E [EC:4.2.1.2]
	malate dehydrogenase	mqo	K00116	malate dehydrogenase (quinone) [EC:1.1.5.4]
		MDH1	K00025	malate dehydrogenase [EC:1.1.1.37]
		MDH2	K00026	malate dehydrogenase [EC:1.1.1.37]																											M3-22_Bin_282_scaffold_41158_4	M3-44_Bin_119_scaffold_6051_13
		mdh	K00024	malate dehydrogenase [EC:1.1.1.37]	Meg22_810_Bin_217_scaffold_15201_8	Meg19_1012_Bin_198_scaffold_2287_5	GCA_002127415_scaffold_70_1			Meg22_1416_Bin_86_scaffold_138329_3		Meg19_1012_Bin_459_scaffold_10849_4			GCA_003599535_scaffold_73_9	GCA_005223185_scaffold_18_148		Meg19_1012_Bin_119_scaffold_3242_15		Meg22_02_Bin_84_scaffold_45192_4		Meg22_24_Bin_124_scaffold_70952_4					SY70-4-11_Bin_40_scaffold_26659_5		BHB10-2_Bin_362_scaffold_55752_2	M3-10_Bin_262_scaffold_309811_2			GCA_003820615_scaffold_139_2		Meg22_46_Bin_210_scaffold_48099_1		Meg22_1214_Bin_176_scaffold_5395_6	Meg22_1214_Bin_137_scaffold_48483_6	Meg22_46_Bin_89_scaffold_4079_16	Meg22_24_Bin_129_scaffold_73964_1,Meg22_24_Bin_129_scaffold_89233_1				SY70-4-3_Bin_44_scaffold_51950_2	SY70-4-3_Bin_59_scaffold_41710_3				Meg22_46_Bin_45_scaffold_202733_1
Reductive TCA cycle	ATP-citrate lyase	ACLY	K01648	ATP citrate (pro-S)-lyase [EC:2.3.3.8]
		aclA	K15230	ATP-citrate lyase alpha-subunit [EC:2.3.3.8]
		aclB	K15231	ATP-citrate lyase beta-subunit [EC:2.3.3.8]
	2-oxoglutarate:ferredoxin oxidoreductase	korA, oorA, oforA	K00174	2-oxoglutarate/2-oxoacid ferredoxin oxidoreductase subunit alpha [EC:1.2.7.3 1.2.7.11]	Meg22_810_Bin_217_scaffold_108885_1,Meg22_810_Bin_217_scaffold_61192_5	Meg19_1012_Bin_198_scaffold_1620_39,Meg19_1012_Bin_198_scaffold_8718_5	GCA_002127415_scaffold_353_7,GCA_002127415_scaffold_53_7	Ga0186947_scaffold_1001_85		Meg22_1416_Bin_86_scaffold_76829_2,Meg22_1416_Bin_86_scaffold_81056_5	Meg22_46_Bin_23_scaffold_206149_4,Meg22_46_Bin_23_scaffold_61638_4	Meg19_1012_Bin_459_scaffold_311_14,Meg19_1012_Bin_459_scaffold_5327_19		M8-62_Bin_262_scaffold_19257_8,M8-62_Bin_262_scaffold_69755_7	GCA_003599535_scaffold_10_7	GCA_005223185_scaffold_4_107,GCA_005223185_scaffold_7_408	Meg22_46_Bin_11_scaffold_211830_3,Meg22_46_Bin_11_scaffold_220031_1	Meg19_1012_Bin_119_scaffold_12288_20,Meg19_1012_Bin_119_scaffold_15227_4,Meg19_1012_Bin_119_scaffold_4196_21,Meg19_1012_Bin_119_scaffold_6736_14	Meg19_46_Bin_239_scaffold_33496_3,Meg19_46_Bin_239_scaffold_90484_3	Meg22_02_Bin_84_scaffold_168544_2,Meg22_02_Bin_84_scaffold_198526_4,Meg22_02_Bin_84_scaffold_83941_2	Meg19_46_Bin_60_scaffold_105872_4,Meg19_46_Bin_60_scaffold_33289_3,Meg19_46_Bin_60_scaffold_8558_3	Meg22_24_Bin_124_scaffold_64627_4,Meg22_24_Bin_124_scaffold_9078_2	Meg22_46_Bin_213_scaffold_16344_8	M3-38_Bin_215_scaffold_101020_7,M3-38_Bin_215_scaffold_160603_5,M3-38_Bin_215_scaffold_185581_2,M3-38_Bin_215_scaffold_406340_3	M8-62_Bin_157_scaffold_145334_1,M8-62_Bin_157_scaffold_14724_9,M8-62_Bin_157_scaffold_18940_3,M8-62_Bin_157_scaffold_20527_11	M8-62_Bin_326_scaffold_155453_3,M8-62_Bin_326_scaffold_211431_5,M8-62_Bin_326_scaffold_316419_2,M8-62_Bin_326_scaffold_70105_3	SY70-4-11_Bin_40_scaffold_10799_11,SY70-4-11_Bin_40_scaffold_82115_1	AB_03_Bin_160_scaffold_10083_10,AB_03_Bin_160_scaffold_6058_4,AB_03_Bin_160_scaffold_75735_2	BHB10-2_Bin_362_scaffold_12609_19,BHB10-2_Bin_362_scaffold_357628_2,BHB10-2_Bin_362_scaffold_85424_5	M3-10_Bin_262_scaffold_50235_3	M3-22_Bin_282_scaffold_47347_5	M3-44_Bin_119_scaffold_822_6,M3-44_Bin_119_scaffold_3079_49,M3-44_Bin_119_scaffold_40472_2	GCA_003820615_scaffold_494_3,GCA_003820615_scaffold_682_3	LQ108M_Bin_12_scaffold_12_114,LQ108M_Bin_12_scaffold_17_53	Meg22_46_Bin_210_scaffold_123995_1,Meg22_46_Bin_210_scaffold_50305_1,Meg22_46_Bin_210_scaffold_86907_1	Meg22_1012_Bin_348_scaffold_101479_2,Meg22_1012_Bin_348_scaffold_42958_5,Meg22_1012_Bin_348_scaffold_58834_3	Meg22_1214_Bin_176_scaffold_13089_3,Meg22_1214_Bin_176_scaffold_25418_4,Meg22_1214_Bin_176_scaffold_3507_11	Meg22_1214_Bin_137_scaffold_20273_3,Meg22_1214_Bin_137_scaffold_95843_4	Meg22_46_Bin_89_scaffold_128851_5,Meg22_46_Bin_89_scaffold_23233_10,Meg22_46_Bin_89_scaffold_4642_14,Meg22_46_Bin_89_scaffold_9959_12	Meg22_24_Bin_129_scaffold_173866_1,Meg22_24_Bin_129_scaffold_5421_8,Meg22_24_Bin_129_scaffold_55078_1,Meg22_24_Bin_129_scaffold_8661_5	BHB10-38_Bin_186_scaffold_123648_5,BHB10-38_Bin_186_scaffold_25401_10	BHB10-38_Bin_9_scaffold_273932_2,BHB10-38_Bin_9_scaffold_308987_2,BHB10-38_Bin_9_scaffold_41635_4,BHB10-38_Bin_9_scaffold_44076_5,BHB10-38_Bin_9_scaffold_63548_6	M3-30_Bin_374_scaffold_1200_30,M3-30_Bin_374_scaffold_177905_3,M3-30_Bin_374_scaffold_18230_11,M3-30_Bin_374_scaffold_24987_10,M3-30_Bin_374_scaffold_24987_6,M3-30_Bin_374_scaffold_471_57	SY70-4-3_Bin_44_scaffold_5128_4	SY70-4-3_Bin_59_scaffold_72507_2,SY70-4-3_Bin_59_scaffold_89033_2	Meg19_02_Bin_5_scaffold_117969_4	ex4484_8_scaffold_2768_12,ex4484_8_scaffold_8976_9	Meg19_46_Bin_228_scaffold_249185_1,Meg19_46_Bin_228_scaffold_151294_4,Meg19_46_Bin_228_scaffold_31990_4,Meg19_46_Bin_228_scaffold_85097_1	Meg22_46_Bin_45_scaffold_6282_11,Meg22_46_Bin_45_scaffold_66941_4,Meg22_46_Bin_45_scaffold_76902_2,Meg22_46_Bin_45_scaffold_999_9
		korB, oorB, oforB	K00175	2-oxoglutarate/2-oxoacid ferredoxin oxidoreductase subunit beta [EC:1.2.7.3 1.2.7.11]	Meg22_810_Bin_217_scaffold_61192_4	Meg19_1012_Bin_198_scaffold_1620_38,Meg19_1012_Bin_198_scaffold_8718_4	GCA_002127415_scaffold_353_6,GCA_002127415_scaffold_53_8	Ga0186947_scaffold_1001_86		Meg22_1416_Bin_86_scaffold_76829_3,Meg22_1416_Bin_86_scaffold_81056_4	Meg22_46_Bin_23_scaffold_61638_5	Meg19_1012_Bin_459_scaffold_311_13,Meg19_1012_Bin_459_scaffold_5327_18	M3-44_Bin_198_scaffold_291547_2,M3-44_Bin_198_scaffold_334835_3	M8-62_Bin_262_scaffold_103744_1,M8-62_Bin_262_scaffold_19257_5	GCA_003599535_scaffold_10_8	GCA_005223185_scaffold_4_106,GCA_005223185_scaffold_7_407	Meg22_46_Bin_11_scaffold_251848_1	Meg19_1012_Bin_119_scaffold_12288_19,Meg19_1012_Bin_119_scaffold_15227_3,Meg19_1012_Bin_119_scaffold_4196_20,Meg19_1012_Bin_119_scaffold_6736_13	Meg19_46_Bin_239_scaffold_149168_1,Meg19_46_Bin_239_scaffold_33496_2,Meg19_46_Bin_239_scaffold_90484_2	Meg22_02_Bin_84_scaffold_168544_3,Meg22_02_Bin_84_scaffold_83941_1	Meg19_46_Bin_60_scaffold_105872_5,Meg19_46_Bin_60_scaffold_190460_2,Meg19_46_Bin_60_scaffold_33289_4,Meg19_46_Bin_60_scaffold_8558_4	Meg22_24_Bin_124_scaffold_37721_2,Meg22_24_Bin_124_scaffold_64627_3,Meg22_24_Bin_124_scaffold_9078_3	Meg22_46_Bin_213_scaffold_16344_9,Meg22_46_Bin_213_scaffold_54099_5	M3-38_Bin_215_scaffold_160603_6,M3-38_Bin_215_scaffold_404004_2,M3-38_Bin_215_scaffold_406340_4	M8-62_Bin_157_scaffold_100156_1,M8-62_Bin_157_scaffold_14724_8,M8-62_Bin_157_scaffold_17371_2,M8-62_Bin_157_scaffold_18940_2,M8-62_Bin_157_scaffold_20527_9	M8-62_Bin_326_scaffold_155453_2,M8-62_Bin_326_scaffold_211431_6,M8-62_Bin_326_scaffold_246466_2,M8-62_Bin_326_scaffold_261833_2,M8-62_Bin_326_scaffold_70105_2	SY70-4-11_Bin_40_scaffold_10799_12,SY70-4-11_Bin_40_scaffold_87366_1	AB_03_Bin_160_scaffold_34572_1,AB_03_Bin_160_scaffold_6058_5	BHB10-2_Bin_362_scaffold_12609_18,BHB10-2_Bin_362_scaffold_357628_1,BHB10-2_Bin_362_scaffold_85424_4	M3-10_Bin_262_scaffold_50235_2	M3-22_Bin_282_scaffold_256353_2,M3-22_Bin_282_scaffold_47347_4,M3-22_Bin_282_scaffold_7891_15	M3-44_Bin_119_scaffold_3079_48,M3-44_Bin_119_scaffold_40472_3	GCA_003820615_scaffold_154_3,GCA_003820615_scaffold_329_2,GCA_003820615_scaffold_494_4,GCA_003820615_scaffold_682_4	LQ108M_Bin_12_scaffold_12_113,LQ108M_Bin_12_scaffold_17_52	Meg22_46_Bin_210_scaffold_123995_2,Meg22_46_Bin_210_scaffold_199740_2,Meg22_46_Bin_210_scaffold_50305_2	Meg22_1012_Bin_348_scaffold_101479_3,Meg22_1012_Bin_348_scaffold_42958_4,Meg22_1012_Bin_348_scaffold_58834_4	Meg22_1214_Bin_176_scaffold_13089_2,Meg22_1214_Bin_176_scaffold_25418_3,Meg22_1214_Bin_176_scaffold_3507_12	Meg22_1214_Bin_137_scaffold_95843_3	Meg22_46_Bin_89_scaffold_4642_15,Meg22_46_Bin_89_scaffold_128851_4,Meg22_46_Bin_89_scaffold_23233_9,Meg22_46_Bin_89_scaffold_9959_11	Meg22_24_Bin_129_scaffold_8661_4,Meg22_24_Bin_129_scaffold_21131_7,Meg22_24_Bin_129_scaffold_5421_7	BHB10-38_Bin_186_scaffold_108296_4,BHB10-38_Bin_186_scaffold_123648_4	BHB10-38_Bin_9_scaffold_273932_3,BHB10-38_Bin_9_scaffold_308987_1,BHB10-38_Bin_9_scaffold_41635_3,BHB10-38_Bin_9_scaffold_44076_6,BHB10-38_Bin_9_scaffold_49937_2,BHB10-38_Bin_9_scaffold_63548_12,BHB10-38_Bin_9_scaffold_63548_7	M3-30_Bin_374_scaffold_1200_31,M3-30_Bin_374_scaffold_18230_10,M3-30_Bin_374_scaffold_24987_11,M3-30_Bin_374_scaffold_24987_7,M3-30_Bin_374_scaffold_471_58,M3-30_Bin_374_scaffold_5418_31	SY70-4-3_Bin_44_scaffold_5128_3		Meg19_02_Bin_5_scaffold_117969_3,Meg19_02_Bin_5_scaffold_10650_2,Meg19_02_Bin_5_scaffold_669924_2	ex4484_8_scaffold_2768_11,ex4484_8_scaffold_8976_8	Meg19_46_Bin_228_scaffold_151294_3,Meg19_46_Bin_228_scaffold_193401_2,Meg19_46_Bin_228_scaffold_31990_5,Meg19_46_Bin_228_scaffold_85097_2	Meg22_46_Bin_45_scaffold_999_8,Meg22_46_Bin_45_scaffold_23419_11,Meg22_46_Bin_45_scaffold_6282_10,Meg22_46_Bin_45_scaffold_66941_3
		korC, oorC	K00177	2-oxoglutarate ferredoxin oxidoreductase subunit gamma [EC:1.2.7.3]	Meg22_810_Bin_217_scaffold_61192_3	Meg19_1012_Bin_198_scaffold_1620_37,Meg19_1012_Bin_198_scaffold_8718_3	GCA_002127415_scaffold_353_5,GCA_002127415_scaffold_53_9	Ga0186947_scaffold_1001_87		Meg22_1416_Bin_86_scaffold_76829_4,Meg22_1416_Bin_86_scaffold_81056_3	Meg22_46_Bin_23_scaffold_61638_6	Meg19_1012_Bin_459_scaffold_5327_17	M3-44_Bin_198_scaffold_291547_3	M8-62_Bin_262_scaffold_103744_2,M8-62_Bin_262_scaffold_399994_2	GCA_003599535_scaffold_10_9	GCA_005223185_scaffold_7_406		Meg19_1012_Bin_119_scaffold_12288_19,Meg19_1012_Bin_119_scaffold_4196_19,Meg19_1012_Bin_119_scaffold_6736_12	Meg19_46_Bin_239_scaffold_149168_2,Meg19_46_Bin_239_scaffold_90484_2	Meg22_02_Bin_84_scaffold_266970_3,Meg22_02_Bin_84_scaffold_272945_2,Meg22_02_Bin_84_scaffold_35365_5	Meg19_46_Bin_60_scaffold_190460_3	Meg22_24_Bin_124_scaffold_37721_3,Meg22_24_Bin_124_scaffold_381453_1,Meg22_24_Bin_124_scaffold_64627_2	Meg22_46_Bin_213_scaffold_279343_2,Meg22_46_Bin_213_scaffold_54099_4	M3-38_Bin_215_scaffold_160603_2,M3-38_Bin_215_scaffold_160603_7	M8-62_Bin_157_scaffold_100156_1,M8-62_Bin_157_scaffold_17371_3,M8-62_Bin_157_scaffold_197478_4	M8-62_Bin_326_scaffold_246466_2,M8-62_Bin_326_scaffold_457766_2	SY70-4-11_Bin_40_scaffold_10799_13,SY70-4-11_Bin_40_scaffold_4528_2,SY70-4-11_Bin_40_scaffold_87366_1	AB_03_Bin_160_scaffold_34572_2,AB_03_Bin_160_scaffold_448363_2			M3-22_Bin_282_scaffold_256353_1	M3-44_Bin_119_scaffold_3079_47	GCA_003820615_scaffold_154_2,GCA_003820615_scaffold_329_2,GCA_003820615_scaffold_501_2	LQ108M_Bin_12_scaffold_75_144	Meg22_46_Bin_210_scaffold_123995_2,Meg22_46_Bin_210_scaffold_199740_3,Meg22_46_Bin_210_scaffold_86907_3	Meg22_1012_Bin_348_scaffold_101479_4,Meg22_1012_Bin_348_scaffold_58834_5	Meg22_1214_Bin_176_scaffold_25418_2,Meg22_1214_Bin_176_scaffold_3507_13	Meg22_1214_Bin_137_scaffold_169925_2	Meg22_46_Bin_89_scaffold_4642_16,Meg22_46_Bin_89_scaffold_9959_10	Meg22_24_Bin_129_scaffold_5421_6,Meg22_24_Bin_129_scaffold_8661_3	BHB10-38_Bin_186_scaffold_108296_3,BHB10-38_Bin_186_scaffold_123648_3	BHB10-38_Bin_9_scaffold_273932_1,BHB10-38_Bin_9_scaffold_41635_2,BHB10-38_Bin_9_scaffold_44076_7,BHB10-38_Bin_9_scaffold_49937_3,BHB10-38_Bin_9_scaffold_63548_8,BHB10-38_Bin_9_scaffold_63548_9	M3-30_Bin_374_scaffold_24987_8,M3-30_Bin_374_scaffold_24987_9,M3-30_Bin_374_scaffold_471_59,M3-30_Bin_374_scaffold_5418_30	SY70-4-3_Bin_44_scaffold_20943_4,SY70-4-3_Bin_44_scaffold_5128_2		Meg19_02_Bin_5_scaffold_10650_3,Meg19_02_Bin_5_scaffold_117969_2,Meg19_02_Bin_5_scaffold_201887_2,Meg19_02_Bin_5_scaffold_43851_1,Meg19_02_Bin_5_scaffold_669924_3	ex4484_8_scaffold_2768_10,ex4484_8_scaffold_2768_2,ex4484_8_scaffold_8976_7	Meg19_46_Bin_228_scaffold_151294_2,Meg19_46_Bin_228_scaffold_193401_3,Meg19_46_Bin_228_scaffold_43159_2,Meg19_46_Bin_228_scaffold_85097_3	Meg22_46_Bin_45_scaffold_16606_5,Meg22_46_Bin_45_scaffold_23419_12,Meg22_46_Bin_45_scaffold_57944_4,Meg22_46_Bin_45_scaffold_66941_2,Meg22_46_Bin_45_scaffold_999_7
		korD, oorD	K00176	2-oxoglutarate ferredoxin oxidoreductase subunit delta [EC:1.2.7.3]	Meg22_810_Bin_217_scaffold_108885_2,Meg22_810_Bin_217_scaffold_194231_2,Meg22_810_Bin_217_scaffold_61192_6	Meg19_1012_Bin_198_scaffold_8718_6	GCA_002127415_scaffold_353_8,GCA_002127415_scaffold_53_6	Ga0186947_scaffold_1001_84		Meg22_1416_Bin_86_scaffold_76829_1,Meg22_1416_Bin_86_scaffold_81056_6	Meg22_46_Bin_23_scaffold_61638_3	Meg19_1012_Bin_459_scaffold_5327_20		M8-62_Bin_262_scaffold_69755_6	GCA_003599535_scaffold_10_6	GCA_005223185_scaffold_7_409	Meg22_46_Bin_11_scaffold_211830_2,Meg22_46_Bin_11_scaffold_452362_3	Meg19_1012_Bin_119_scaffold_12288_21,Meg19_1012_Bin_119_scaffold_4196_22,Meg19_1012_Bin_119_scaffold_4196_30	Meg19_46_Bin_239_scaffold_90484_4	Meg22_02_Bin_84_scaffold_191389_6,Meg22_02_Bin_84_scaffold_198526_3	Meg19_46_Bin_60_scaffold_126045_2	Meg22_24_Bin_124_scaffold_158355_3,Meg22_24_Bin_124_scaffold_8294_3	Meg22_46_Bin_213_scaffold_17223_14,Meg22_46_Bin_213_scaffold_17223_4,Meg22_46_Bin_213_scaffold_34685_7,Meg22_46_Bin_213_scaffold_64945_4	M3-38_Bin_215_scaffold_406340_2	M8-62_Bin_157_scaffold_145334_2,M8-62_Bin_157_scaffold_18940_4,M8-62_Bin_157_scaffold_197478_2	M8-62_Bin_326_scaffold_155453_4	SY70-4-11_Bin_40_scaffold_97691_3,SY70-4-11_Bin_40_scaffold_10799_10,SY70-4-11_Bin_40_scaffold_10799_2	AB_03_Bin_160_scaffold_32839_2,AB_03_Bin_160_scaffold_75735_3				M3-44_Bin_119_scaffold_3079_50	GCA_003820615_scaffold_494_2		Meg22_46_Bin_210_scaffold_86907_2	Meg22_1012_Bin_348_scaffold_58834_2	Meg22_1214_Bin_176_scaffold_25418_5,Meg22_1214_Bin_176_scaffold_3507_10	Meg22_1214_Bin_137_scaffold_20273_4	Meg22_46_Bin_89_scaffold_4642_13,Meg22_46_Bin_89_scaffold_9959_13	Meg22_24_Bin_129_scaffold_5421_9,Meg22_24_Bin_129_scaffold_8661_6	BHB10-38_Bin_186_scaffold_123648_6	BHB10-38_Bin_9_scaffold_308987_3,BHB10-38_Bin_9_scaffold_41635_5,BHB10-38_Bin_9_scaffold_44076_4,BHB10-38_Bin_9_scaffold_63548_5	M3-30_Bin_374_scaffold_177905_2,M3-30_Bin_374_scaffold_24987_5,M3-30_Bin_374_scaffold_471_56	SY70-4-3_Bin_44_scaffold_5128_5	SY70-4-3_Bin_59_scaffold_72507_3,SY70-4-3_Bin_59_scaffold_81024_3,SY70-4-3_Bin_59_scaffold_89033_3		ex4484_8_scaffold_2768_13,ex4484_8_scaffold_8976_10	Meg19_46_Bin_228_scaffold_222749_3,Meg19_46_Bin_228_scaffold_34089_6	Meg22_46_Bin_45_scaffold_23419_8,Meg22_46_Bin_45_scaffold_66941_5,Meg22_46_Bin_45_scaffold_76902_3,Meg22_46_Bin_45_scaffold_999_10
Glyoxylate cycle	isocitrate lyase	E4.1.3.1, aceA	K01637	isocitrate lyase [EC:4.1.3.1]																									BHB10-2_Bin_362_scaffold_35999_10,BHB10-2_Bin_362_scaffold_35999_11	M3-10_Bin_262_scaffold_127467_2,M3-10_Bin_262_scaffold_86896_1	M3-22_Bin_282_scaffold_10628_1,M3-22_Bin_282_scaffold_145259_2	M3-44_Bin_119_scaffold_822_10		LQ108M_Bin_12_scaffold_89_127
	malate synthesis	aceB, glcB	K01638	malate synthase [EC:2.3.3.9]																								AB_03_Bin_160_scaffold_79678_2	BHB10-2_Bin_362_scaffold_35999_9	M3-10_Bin_262_scaffold_291899_1,M3-10_Bin_262_scaffold_86896_2	M3-22_Bin_282_scaffold_10628_2,M3-22_Bin_282_scaffold_11018_3	M3-44_Bin_119_scaffold_822_11		LQ108M_Bin_12_scaffold_89_126
		mcl	K08691	malyl-CoA/(S)-citramalyl-CoA lyase [EC:4.1.3.24 4.1.3.25]
		aceB	K19282	bifunctional (S)-malyl-CoA lyase/thioesterase [EC:4.1.3.24 3.1.2.30]
		mcl2	K14451	(3S)-malyl-CoA thioesterase [EC:3.1.2.30]
Pentose Phosphate Pathway	Oxidative phase	H6PD	K13937	hexose-6-phosphate dehydrogenase [EC:1.1.1.47 3.1.1.31]
		G6PD, zwf	K00036	glucose-6-phosphate 1-dehydrogenase [EC:1.1.1.49 1.1.1.363]											GCA_003599535_scaffold_23_22		Meg22_46_Bin_11_scaffold_164982_1	Meg19_1012_Bin_119_scaffold_3552_16	Meg19_46_Bin_239_scaffold_258686_2	Meg22_02_Bin_84_scaffold_261247_1	Meg19_46_Bin_60_scaffold_65954_4	Meg22_24_Bin_124_scaffold_39626_10	Meg22_46_Bin_213_scaffold_276090_3	M3-38_Bin_215_scaffold_50331_7,M3-38_Bin_215_scaffold_523988_3	M8-62_Bin_157_scaffold_14335_8		SY70-4-11_Bin_40_scaffold_68057_2			M3-10_Bin_262_scaffold_313546_2	M3-22_Bin_282_scaffold_11018_15			LQ108M_Bin_12_scaffold_12_209	Meg22_46_Bin_210_scaffold_136010_1														Meg22_46_Bin_45_scaffold_80987_2
		azf	K19243	NAD+ dependent glucose-6-phosphate dehydrogenase [EC:1.1.1.388]
		PGLS, pgl, devB	K01057	6-phosphogluconolactonase [EC:3.1.1.31]											GCA_003599535_scaffold_23_23		Meg22_46_Bin_11_scaffold_164982_2	Meg19_1012_Bin_119_scaffold_3552_17	Meg19_46_Bin_239_scaffold_68993_1	Meg22_02_Bin_84_scaffold_328179_4	Meg19_46_Bin_60_scaffold_360909_4,Meg19_46_Bin_60_scaffold_65954_5	Meg22_24_Bin_124_scaffold_39626_9		M3-38_Bin_215_scaffold_50331_8	M8-62_Bin_157_scaffold_14335_9		SY70-4-11_Bin_40_scaffold_68057_3				M3-22_Bin_282_scaffold_11018_16			LQ108M_Bin_12_scaffold_12_208	Meg22_46_Bin_210_scaffold_136010_2														Meg22_46_Bin_45_scaffold_80987_3
		pgl	K07404	6-phosphogluconolactonase [EC:3.1.1.31]
		PGD, gnd, gntZ	K00033	6-phosphogluconate dehydrogenase [EC:1.1.1.44 1.1.1.343]											GCA_003599535_scaffold_23_21			Meg19_1012_Bin_119_scaffold_3552_15	Meg19_46_Bin_239_scaffold_258686_1	Meg22_02_Bin_84_scaffold_261247_2	Meg19_46_Bin_60_scaffold_65954_3	Meg22_24_Bin_124_scaffold_39626_11	Meg22_46_Bin_213_scaffold_276090_2	M3-38_Bin_215_scaffold_50331_6	M8-62_Bin_157_scaffold_14335_7	M8-62_Bin_326_scaffold_70087_6	SY70-4-11_Bin_40_scaffold_78916_2		BHB10-2_Bin_362_scaffold_36497_12	M3-10_Bin_262_scaffold_132087_1,M3-10_Bin_262_scaffold_313546_1	M3-22_Bin_282_scaffold_11018_14			LQ108M_Bin_12_scaffold_12_206	Meg22_46_Bin_210_scaffold_84617_3
	Non-oxidative phase	E2.2.1.1, tktA, tktB	K00615	transketolase [EC:2.2.1.1]	Meg22_810_Bin_217_scaffold_61254_5	Meg19_1012_Bin_198_scaffold_381_34,Meg19_1012_Bin_198_scaffold_381_35	GCA_002127415_scaffold_222_2,GCA_002127415_scaffold_222_3	Ga0186947_scaffold_1004_10,Ga0186947_scaffold_1004_11	Ga0170695_scaffold_1003_19,Ga0170695_scaffold_1003_20	Meg22_1416_Bin_86_scaffold_196220_2	Meg22_46_Bin_23_scaffold_59435_3	Meg19_1012_Bin_459_scaffold_187_38	M3-44_Bin_198_scaffold_143024_3		GCA_003599535_scaffold_23_17,GCA_003599535_scaffold_59_22	GCA_005223185_scaffold_1_179	Meg22_46_Bin_11_scaffold_197246_1	Meg19_1012_Bin_119_scaffold_39796_2,Meg19_1012_Bin_119_scaffold_8570_7	Meg19_46_Bin_239_scaffold_13688_2		Meg19_46_Bin_60_scaffold_172477_1,Meg19_46_Bin_60_scaffold_238402_2	Meg22_24_Bin_124_scaffold_102343_2,Meg22_24_Bin_124_scaffold_28249_1		M3-38_Bin_215_scaffold_140120_1,M3-38_Bin_215_scaffold_139203_4	M8-62_Bin_157_scaffold_14902_8		SY70-4-11_Bin_40_scaffold_50051_2,SY70-4-11_Bin_40_scaffold_39225_1,SY70-4-11_Bin_40_scaffold_63021_2	AB_03_Bin_160_scaffold_77428_4	BHB10-2_Bin_362_scaffold_233232_2		M3-22_Bin_282_scaffold_15575_6,M3-22_Bin_282_scaffold_31544_6	M3-44_Bin_119_scaffold_1301_46	GCA_003820615_scaffold_44_1	LQ108M_Bin_12_scaffold_2_135,LQ108M_Bin_12_scaffold_12_207	Meg22_46_Bin_210_scaffold_548399_4,Meg22_46_Bin_210_scaffold_221778_2,Meg22_46_Bin_210_scaffold_548399_3	Meg22_1012_Bin_348_scaffold_72469_2	Meg22_1214_Bin_176_scaffold_66191_9,Meg22_1214_Bin_176_scaffold_76345_2	Meg22_1214_Bin_137_scaffold_122529_1,Meg22_1214_Bin_137_scaffold_46529_1,Meg22_1214_Bin_137_scaffold_5013_14	Meg22_46_Bin_89_scaffold_16174_4,Meg22_46_Bin_89_scaffold_17564_3,Meg22_46_Bin_89_scaffold_6133_10,Meg22_46_Bin_89_scaffold_62299_7	Meg22_24_Bin_129_scaffold_14351_9,Meg22_24_Bin_129_scaffold_48158_3,Meg22_24_Bin_129_scaffold_51315_1,Meg22_24_Bin_129_scaffold_542_28	BHB10-38_Bin_186_scaffold_142222_1,BHB10-38_Bin_186_scaffold_15849_6,BHB10-38_Bin_186_scaffold_15849_7	BHB10-38_Bin_9_scaffold_12050_12	M3-30_Bin_374_scaffold_1398_17,M3-30_Bin_374_scaffold_8455_13	SY70-4-3_Bin_44_scaffold_87099_3	SY70-4-3_Bin_59_scaffold_4521_9	Meg19_02_Bin_5_scaffold_113073_2,Meg19_02_Bin_5_scaffold_155062_4	ex4484_8_scaffold_565_13,ex4484_8_scaffold_1367_12,ex4484_8_scaffold_2132_6,ex4484_8_scaffold_4980_12,ex4484_8_scaffold_5149_7,ex4484_8_scaffold_565_12	Meg19_46_Bin_228_scaffold_91090_4,Meg19_46_Bin_228_scaffold_42887_3,Meg19_46_Bin_228_scaffold_65567_2,Meg19_46_Bin_228_scaffold_91090_3	Meg22_46_Bin_45_scaffold_113175_3,Meg22_46_Bin_45_scaffold_113175_2,Meg22_46_Bin_45_scaffold_18315_3,Meg22_46_Bin_45_scaffold_243347_1
		E2.2.1.2, talA, talB	K00616	transaldolase [EC:2.2.1.2]	Meg22_810_Bin_217_scaffold_105497_5	Meg19_1012_Bin_198_scaffold_22706_3	GCA_002127415_scaffold_336_2	Ga0186947_scaffold_1012_14			Meg22_46_Bin_23_scaffold_16659_6	Meg19_1012_Bin_459_scaffold_1055_10	M3-44_Bin_198_scaffold_245348_2	M8-62_Bin_262_scaffold_376830_3	GCA_003599535_scaffold_23_19	GCA_005223185_scaffold_1_39	Meg22_46_Bin_11_scaffold_23238_1	Meg19_1012_Bin_119_scaffold_12333_2		Meg22_02_Bin_84_scaffold_95455_3		Meg22_24_Bin_124_scaffold_278298_4	Meg22_46_Bin_213_scaffold_156436_5	M3-38_Bin_215_scaffold_331110_5			SY70-4-11_Bin_40_scaffold_83916_3		BHB10-2_Bin_362_scaffold_77646_3	M3-10_Bin_262_scaffold_153503_3,M3-10_Bin_262_scaffold_70146_4	M3-22_Bin_282_scaffold_17031_15,M3-22_Bin_282_scaffold_80583_2	M3-44_Bin_119_scaffold_3774_24,M3-44_Bin_119_scaffold_389594_3	GCA_003820615_scaffold_278_4,GCA_003820615_scaffold_394_2	LQ108M_Bin_12_scaffold_12_210,LQ108M_Bin_12_scaffold_29_6			Meg22_1214_Bin_176_scaffold_3287_20	Meg22_1214_Bin_137_scaffold_43408_7	Meg22_46_Bin_89_scaffold_1217_14,Meg22_46_Bin_89_scaffold_3506_8	Meg22_24_Bin_129_scaffold_1591_7,Meg22_24_Bin_129_scaffold_4868_10	BHB10-38_Bin_186_scaffold_77068_3	BHB10-38_Bin_9_scaffold_46318_3,BHB10-38_Bin_9_scaffold_6612_17	M3-30_Bin_374_scaffold_1606_14					Meg19_46_Bin_228_scaffold_196828_3	Meg22_46_Bin_45_scaffold_15702_7,Meg22_46_Bin_45_scaffold_999_15
		tal-pgi	K13810	transaldolase / glucose-6-phosphate isomerase [EC:2.2.1.2 5.3.1.9]											GCA_003599535_scaffold_23_19		Meg22_46_Bin_11_scaffold_29289_6	Meg19_1012_Bin_119_scaffold_6657_6	Meg19_46_Bin_239_scaffold_18897_7		Meg19_46_Bin_60_scaffold_32563_5	Meg22_24_Bin_124_scaffold_12849_2			M8-62_Bin_157_scaffold_1879_38			AB_03_Bin_160_scaffold_38623_3						LQ108M_Bin_12_scaffold_12_210					Meg22_46_Bin_89_scaffold_16174_6
		rpe, RPE	K01783	ribulose-phosphate 3-epimerase [EC:5.1.3.1]		Meg19_1012_Bin_198_scaffold_381_44	GCA_002127415_scaffold_222_12	Ga0186947_scaffold_1004_20	Ga0170695_scaffold_1082_3	Meg22_1416_Bin_86_scaffold_42796_4	Meg22_46_Bin_23_scaffold_165008_3	Meg19_1012_Bin_459_scaffold_284_139	M3-44_Bin_198_scaffold_287104_6	M8-62_Bin_262_scaffold_82326_11	GCA_003599535_scaffold_99_5	GCA_005223185_scaffold_12_324	Meg22_46_Bin_11_scaffold_94957_2	Meg19_1012_Bin_119_scaffold_3088_37	Meg19_46_Bin_239_scaffold_154209_1	Meg22_02_Bin_84_scaffold_135396_2		Meg22_24_Bin_124_scaffold_40800_7	Meg22_46_Bin_213_scaffold_36333_7		M8-62_Bin_157_scaffold_10098_9	M8-62_Bin_326_scaffold_35220_6,M8-62_Bin_326_scaffold_470959_2		AB_03_Bin_160_scaffold_67942_3		M3-10_Bin_262_scaffold_66691_5	M3-22_Bin_282_scaffold_42057_8	M3-44_Bin_119_scaffold_3356_16		LQ108M_Bin_12_scaffold_89_81		Meg22_1012_Bin_348_scaffold_90465_3	Meg22_1214_Bin_176_scaffold_10926_13	Meg22_1214_Bin_137_scaffold_16046_11	Meg22_46_Bin_89_scaffold_46664_4		BHB10-38_Bin_186_scaffold_104083_5	BHB10-38_Bin_9_scaffold_5603_25	M3-30_Bin_374_scaffold_716_43	SY70-4-3_Bin_44_scaffold_61676_2		Meg19_02_Bin_5_scaffold_28582_5,Meg19_02_Bin_5_scaffold_55747_5		Meg19_46_Bin_228_scaffold_184026_2,Meg19_46_Bin_228_scaffold_64937_2	Meg22_46_Bin_45_scaffold_254937_2
		riiA	K01807	ribose 5-phosphate isomerase A [EC:5.3.1.6]																									BHB10-2_Bin_362_scaffold_200479_2	M3-10_Bin_262_scaffold_189810_2	M3-22_Bin_282_scaffold_25616_2	M3-44_Bin_119_scaffold_27482_9																	Meg22_46_Bin_45_scaffold_56635_2
		rpiB	K01808	ribose 5-phosphate isomerase B [EC:5.3.1.6]		Meg19_1012_Bin_198_scaffold_4241_7	GCA_002127415_scaffold_107_3	Ga0186947_scaffold_1003_3	Ga0170695_scaffold_1012_25			Meg19_1012_Bin_459_scaffold_3639_15	M3-44_Bin_198_scaffold_102875_5	M8-62_Bin_262_scaffold_327880_2	GCA_003599535_scaffold_1_53,GCA_003599535_scaffold_23_18,GCA_003599535_scaffold_37_13	GCA_005223185_scaffold_18_13,GCA_005223185_scaffold_1_87	Meg22_46_Bin_11_scaffold_150549_2	Meg19_1012_Bin_119_scaffold_8570_8	Meg19_46_Bin_239_scaffold_13688_3			Meg22_24_Bin_124_scaffold_28249_2	Meg22_46_Bin_213_scaffold_32052_2	M3-38_Bin_215_scaffold_139203_3	M8-62_Bin_157_scaffold_14902_9	M8-62_Bin_326_scaffold_252400_4	SY70-4-11_Bin_40_scaffold_61485_2	AB_03_Bin_160_scaffold_8711_10	BHB10-2_Bin_362_scaffold_81248_2		M3-22_Bin_282_scaffold_20558_8	M3-44_Bin_119_scaffold_7024_7	GCA_003820615_scaffold_437_2	LQ108M_Bin_12_scaffold_29_202,LQ108M_Bin_12_scaffold_2_120	Meg22_46_Bin_210_scaffold_123830_4	Meg22_1012_Bin_348_scaffold_133385_4,Meg22_1012_Bin_348_scaffold_184124_4	Meg22_1214_Bin_176_scaffold_7719_23	Meg22_1214_Bin_137_scaffold_25997_8,Meg22_1214_Bin_137_scaffold_46529_2	Meg22_46_Bin_89_scaffold_16174_5,Meg22_46_Bin_89_scaffold_62299_8	Meg22_24_Bin_129_scaffold_48158_2,Meg22_24_Bin_129_scaffold_7820_7	BHB10-38_Bin_186_scaffold_123246_4	BHB10-38_Bin_9_scaffold_24846_9,BHB10-38_Bin_9_scaffold_45689_8,BHB10-38_Bin_9_scaffold_87429_5	M3-30_Bin_374_scaffold_11802_7,M3-30_Bin_374_scaffold_25943_5		SY70-4-3_Bin_59_scaffold_65320_4	Meg19_02_Bin_5_scaffold_21083_2,Meg19_02_Bin_5_scaffold_53007_2	ex4484_8_scaffold_1457_7	Meg19_46_Bin_228_scaffold_156226_3,Meg19_46_Bin_228_scaffold_19855_8	Meg22_46_Bin_45_scaffold_118967_4
	Archaea	hxlB	K08094	6-phospho-3-hexuloisomerase [EC:5.3.1.27]
		hps-phi	K13831	3-hexulose-6-phosphate synthase / 6-phospho-3-hexuloisomerase [EC:4.1.2.43 5.3.1.27]									M3-44_Bin_198_scaffold_10667_10
		hxlA	K08093	3-hexulose-6-phosphate synthase [EC:4.1.2.43]
		fae-hps	K13812	bifunctional enzyme Fae/Hps [EC:4.2.1.147 4.1.2.43]
		hps-phi	K13831	3-hexulose-6-phosphate synthase / 6-phospho-3-hexuloisomerase [EC:4.1.2.43 5.3.1.27]									M3-44_Bin_198_scaffold_10667_10
		rpiA	K01807	ribose 5-phosphate isomerase A [EC:5.3.1.6]																									BHB10-2_Bin_362_scaffold_200479_2	M3-10_Bin_262_scaffold_189810_2	M3-22_Bin_282_scaffold_25616_2	M3-44_Bin_119_scaffold_27482_9																	Meg22_46_Bin_45_scaffold_56635_2
	PRPP biosynthesis	PRPS, prsA	K00948	ribose-phosphate pyrophosphokinase [EC:2.7.6.1]	Meg22_810_Bin_217_scaffold_168669_4,Meg22_810_Bin_217_scaffold_50025_6	Meg19_1012_Bin_198_scaffold_4618_13	GCA_002127415_scaffold_133_5	Ga0186947_scaffold_1070_4	Ga0170695_scaffold_1005_4	Meg22_1416_Bin_86_scaffold_42486_4	Meg22_46_Bin_23_scaffold_68648_5,Meg22_46_Bin_23_scaffold_68648_6	Meg19_1012_Bin_459_scaffold_187_49		M8-62_Bin_262_scaffold_460899_3	GCA_003599535_scaffold_59_8	GCA_005223185_scaffold_1_169	Meg22_46_Bin_11_scaffold_127205_4	Meg19_1012_Bin_119_scaffold_9478_5				Meg22_24_Bin_124_scaffold_78899_5	Meg22_46_Bin_213_scaffold_23295_3,Meg22_46_Bin_213_scaffold_23295_4	M3-38_Bin_215_scaffold_155129_6	M8-62_Bin_157_scaffold_11941_15	M8-62_Bin_326_scaffold_318805_2,M8-62_Bin_326_scaffold_45705_1	SY70-4-11_Bin_40_scaffold_1437_7	AB_03_Bin_160_scaffold_8680_4	BHB10-2_Bin_362_scaffold_51621_10	M3-10_Bin_262_scaffold_56734_1	M3-22_Bin_282_scaffold_4297_4	M3-44_Bin_119_scaffold_2155_62	GCA_003820615_scaffold_620_4	LQ108M_Bin_12_scaffold_12_377	Meg22_46_Bin_210_scaffold_96746_1	Meg22_1012_Bin_348_scaffold_90942_4	Meg22_1214_Bin_176_scaffold_17140_6	Meg22_1214_Bin_137_scaffold_283133_1	Meg22_46_Bin_89_scaffold_13422_11	Meg22_24_Bin_129_scaffold_1221_15	BHB10-38_Bin_186_scaffold_392272_2,BHB10-38_Bin_186_scaffold_46464_14	BHB10-38_Bin_9_scaffold_15126_4	M3-30_Bin_374_scaffold_10192_6	SY70-4-3_Bin_44_scaffold_44062_2	SY70-4-3_Bin_59_scaffold_42020_2			Meg19_46_Bin_228_scaffold_28893_1	Meg22_46_Bin_45_scaffold_12114_3
	Riokinase	rbsK, RBKS	K00852	ribokinase [EC:2.7.1.15]						Meg22_1416_Bin_86_scaffold_33860_5														M3-38_Bin_215_scaffold_202916_3	M8-62_Bin_157_scaffold_184727_2									LQ108M_Bin_12_scaffold_89_6	Meg22_46_Bin_210_scaffold_80669_4
Calvin Cycle	Phosphoribulokinase	PRK, prkB	K00855	phosphoribulokinase [EC:2.7.1.19]
	RuBisCo	rbcL, cbbL	K01601	ribulose-bisphosphate carboxylase large chain [EC:4.1.1.39]
		rbcS, cbbS	K01602	ribulose-bisphosphate carboxylase small chain [EC:4.1.1.39]
Galactose Metabolism		galM, GALM	K01785	aldose 1-epimerase [EC:5.1.3.3]															Meg19_46_Bin_239_scaffold_254877_1		Meg19_46_Bin_60_scaffold_101895_5	Meg22_24_Bin_124_scaffold_11785_4	Meg22_46_Bin_213_scaffold_15986_10				SY70-4-11_Bin_40_scaffold_19129_3
		galK	K00849	galactokinase [EC:2.7.1.6]														Meg19_1012_Bin_119_scaffold_11901_11		Meg22_02_Bin_84_scaffold_3295_9	Meg19_46_Bin_60_scaffold_10159_7	Meg22_24_Bin_124_scaffold_8840_8	Meg22_46_Bin_213_scaffold_51709_8	M3-38_Bin_215_scaffold_440458_2	M8-62_Bin_157_scaffold_6788_20,M8-62_Bin_157_scaffold_19750_7		SY70-4-11_Bin_40_scaffold_4404_3
		galT, GALT	K00965	UDPglucose--hexose-1-phosphate uridylyltransferase [EC:2.7.7.12]		Meg19_1012_Bin_198_scaffold_5382_9	GCA_002127415_scaffold_201_1	Ga0186947_scaffold_1036_1	Ga0170695_scaffold_1022_3	Meg22_1416_Bin_86_scaffold_162994_3		Meg19_1012_Bin_459_scaffold_247_49	M3-44_Bin_198_scaffold_159568_3	M8-62_Bin_262_scaffold_428346_2,M8-62_Bin_262_scaffold_76314_7	GCA_003599535_scaffold_2_38	GCA_005223185_scaffold_13_81												AB_03_Bin_160_scaffold_32027_4,AB_03_Bin_160_scaffold_46171_1					GCA_003820615_scaffold_699_4	LQ108M_Bin_12_scaffold_12_264	Meg22_46_Bin_210_scaffold_101431_2	Meg22_1012_Bin_348_scaffold_114071_4,Meg22_1012_Bin_348_scaffold_30073_5	Meg22_1214_Bin_176_scaffold_21297_7,Meg22_1214_Bin_176_scaffold_63053_2	Meg22_1214_Bin_137_scaffold_123751_1,Meg22_1214_Bin_137_scaffold_29470_1	Meg22_46_Bin_89_scaffold_17596_7,Meg22_46_Bin_89_scaffold_2971_13,Meg22_46_Bin_89_scaffold_898_22	Meg22_24_Bin_129_scaffold_14692_3,Meg22_24_Bin_129_scaffold_9286_2,Meg22_24_Bin_129_scaffold_953_22	BHB10-38_Bin_186_scaffold_218606_3,BHB10-38_Bin_186_scaffold_89687_2		M3-30_Bin_374_scaffold_1047_73,M3-30_Bin_374_scaffold_214_49	SY70-4-3_Bin_44_scaffold_107315_2	SY70-4-3_Bin_59_scaffold_35463_2			Meg19_46_Bin_228_scaffold_92556_1
		galE, GALE	K01784	UDP-glucose 4-epimerase [EC:5.1.3.2]	Meg22_810_Bin_217_scaffold_126754_2,Meg22_810_Bin_217_scaffold_160483_2	Meg19_1012_Bin_198_scaffold_15006_1	GCA_002127415_scaffold_199_2,GCA_002127415_scaffold_35_6	Ga0186947_scaffold_1009_28		Meg22_1416_Bin_86_scaffold_98810_5		Meg19_1012_Bin_459_scaffold_19739_7,Meg19_1012_Bin_459_scaffold_369_40,Meg19_1012_Bin_459_scaffold_537_33	M3-44_Bin_198_scaffold_200343_2	M8-62_Bin_262_scaffold_3381_17,M8-62_Bin_262_scaffold_40401_16,M8-62_Bin_262_scaffold_61797_5	GCA_003599535_scaffold_16_12,GCA_003599535_scaffold_27_24	GCA_005223185_scaffold_7_200,GCA_005223185_scaffold_12_290,GCA_005223185_scaffold_12_87	Meg22_46_Bin_11_scaffold_103632_2	Meg19_1012_Bin_119_scaffold_3088_46	Meg19_46_Bin_239_scaffold_83515_5		Meg19_46_Bin_60_scaffold_113226_3	Meg22_24_Bin_124_scaffold_9403_9			M8-62_Bin_157_scaffold_10098_18	M8-62_Bin_326_scaffold_65036_6		AB_03_Bin_160_scaffold_43087_3	BHB10-2_Bin_362_scaffold_25368_12,BHB10-2_Bin_362_scaffold_93495_1	M3-10_Bin_262_scaffold_61111_2,M3-10_Bin_262_scaffold_73629_5,M3-10_Bin_262_scaffold_246803_1,M3-10_Bin_262_scaffold_67433_4	M3-22_Bin_282_scaffold_15482_10,M3-22_Bin_282_scaffold_11140_10,M3-22_Bin_282_scaffold_29836_4	M3-44_Bin_119_scaffold_2323_13,M3-44_Bin_119_scaffold_1215_34,M3-44_Bin_119_scaffold_37818_4,M3-44_Bin_119_scaffold_386190_2	GCA_003820615_scaffold_7_3	LQ108M_Bin_12_scaffold_12_31,LQ108M_Bin_12_scaffold_12_12,LQ108M_Bin_12_scaffold_29_339,LQ108M_Bin_12_scaffold_2_316,LQ108M_Bin_12_scaffold_359_40	Meg22_46_Bin_210_scaffold_28383_5	Meg22_1012_Bin_348_scaffold_16597_6	Meg22_1214_Bin_176_scaffold_57634_1	Meg22_1214_Bin_137_scaffold_45613_5,Meg22_1214_Bin_137_scaffold_40234_4	Meg22_46_Bin_89_scaffold_12164_8,Meg22_46_Bin_89_scaffold_1845_31,Meg22_46_Bin_89_scaffold_4101_5	Meg22_24_Bin_129_scaffold_11740_6,Meg22_24_Bin_129_scaffold_3006_4,Meg22_24_Bin_129_scaffold_4772_8,Meg22_24_Bin_129_scaffold_59085_1	BHB10-38_Bin_186_scaffold_159968_7,BHB10-38_Bin_186_scaffold_177419_1,BHB10-38_Bin_186_scaffold_387936_2	BHB10-38_Bin_9_scaffold_63693_7	M3-30_Bin_374_scaffold_6801_4	SY70-4-3_Bin_44_scaffold_15309_4,SY70-4-3_Bin_44_scaffold_9976_2			ex4484_8_scaffold_8076_3	Meg19_46_Bin_228_scaffold_117011_3
		pmm-pgm	K15778	phosphomannomutase / phosphoglucomutase [EC:5.4.2.8 5.4.2.2]	Meg22_810_Bin_217_scaffold_7962_6	Meg19_1012_Bin_198_scaffold_12827_10	GCA_002127415_scaffold_352_4		Ga0170695_scaffold_1034_5			Meg19_1012_Bin_459_scaffold_3158_19		M8-62_Bin_262_scaffold_30979_9	GCA_003599535_scaffold_71_15	GCA_005223185_scaffold_3_53		Meg19_1012_Bin_119_scaffold_10543_8	Meg19_46_Bin_239_scaffold_51732_4	Meg22_02_Bin_84_scaffold_124437_2	Meg19_46_Bin_60_scaffold_49395_4	Meg22_24_Bin_124_scaffold_7728_12	Meg22_46_Bin_213_scaffold_14209_12		M8-62_Bin_157_scaffold_17367_14	M8-62_Bin_326_scaffold_95226_7	SY70-4-11_Bin_40_scaffold_32141_3	AB_03_Bin_160_scaffold_69082_2			M3-22_Bin_282_scaffold_6263_10	M3-44_Bin_119_scaffold_1092_64	GCA_003820615_scaffold_21_6	LQ108M_Bin_12_scaffold_29_129		Meg22_1012_Bin_348_scaffold_58970_4	Meg22_1214_Bin_176_scaffold_25244_6		Meg22_46_Bin_89_scaffold_1009_21	Meg22_24_Bin_129_scaffold_2257_19				SY70-4-3_Bin_44_scaffold_6468_6	SY70-4-3_Bin_59_scaffold_79047_3		ex4484_8_scaffold_67_19		Meg22_46_Bin_45_scaffold_14290_6
		PGM2	K15779	phosphoglucomutase / phosphopentomutase [EC:5.4.2.2 5.4.2.7]
		pgm	K01835	phosphoglucomutase [EC:5.4.2.2]																															Meg22_46_Bin_210_scaffold_174731_3								M3-30_Bin_374_scaffold_2052_22
Wood-Ljundahl Pathway (Acetogenesis)	CO dehydrogenase	cooS, acsA	K00198	anaerobic carbon-monoxide dehydrogenase catalytic subunit [EC:1.2.7.4]						Meg22_1416_Bin_86_scaffold_144285_1	Meg22_46_Bin_23_scaffold_91251_3	Meg19_1012_Bin_459_scaffold_263_61	M3-44_Bin_198_scaffold_34627_1	M8-62_Bin_262_scaffold_17368_22,M8-62_Bin_262_scaffold_429258_1,M8-62_Bin_262_scaffold_60339_7	GCA_003599535_scaffold_10_39	GCA_005223185_scaffold_8_32																			Meg22_46_Bin_210_scaffold_83469_2	Meg22_1012_Bin_348_scaffold_11584_1	Meg22_1214_Bin_176_scaffold_13786_7		Meg22_46_Bin_89_scaffold_13084_6,Meg22_46_Bin_89_scaffold_28088_2	Meg22_24_Bin_129_scaffold_34154_4,Meg22_24_Bin_129_scaffold_59799_1		BHB10-38_Bin_9_scaffold_16857_15	M3-30_Bin_374_scaffold_2365_26	SY70-4-3_Bin_44_scaffold_15900_1
		cooF	K00196	anaerobic carbon-monoxide dehydrogenase iron sulfur subunit			GCA_002127415_scaffold_9_5				Meg22_46_Bin_23_scaffold_91251_2	Meg19_1012_Bin_459_scaffold_263_60	M3-44_Bin_198_scaffold_34627_2	M8-62_Bin_262_scaffold_429258_2,M8-62_Bin_262_scaffold_60339_6	GCA_003599535_scaffold_10_38	GCA_005223185_scaffold_8_33				Meg22_02_Bin_84_scaffold_65072_1															Meg22_46_Bin_210_scaffold_83469_1					Meg22_24_Bin_129_scaffold_109083_3				SY70-4-3_Bin_44_scaffold_127469_5	SY70-4-3_Bin_59_scaffold_13099_3		ex4484_8_scaffold_1111_14	Meg19_46_Bin_228_scaffold_195004_3	Meg22_46_Bin_45_scaffold_30051_4
	acetyl-CoA synthase	acsB	K14138	acetyl-CoA synthase [EC:2.3.1.169]							Meg22_46_Bin_23_scaffold_102774_1	Meg19_1012_Bin_459_scaffold_263_56	M3-44_Bin_198_scaffold_34627_5	M8-62_Bin_262_scaffold_310945_1,M8-62_Bin_262_scaffold_60339_3	GCA_003599535_scaffold_10_34	GCA_005223185_scaffold_8_35																			Meg22_46_Bin_210_scaffold_94267_2				Meg22_46_Bin_89_scaffold_28088_3	Meg22_24_Bin_129_scaffold_131169_2			M3-30_Bin_374_scaffold_2365_27	SY70-4-3_Bin_44_scaffold_15900_2
		cdhE, acsC	K00197	acetyl-CoA decarbonylase/synthase, CODH/ACS complex subunit gamma [EC:2.1.1.245]								Meg19_1012_Bin_459_scaffold_263_52		M8-62_Bin_262_scaffold_161666_7	GCA_003599535_scaffold_7_16	GCA_005223185_scaffold_8_39																								Meg22_24_Bin_129_scaffold_67835_2			M3-30_Bin_374_scaffold_2365_30	SY70-4-3_Bin_44_scaffold_106518_3
		cdhD, acsD	K00194	acetyl-CoA decarbonylase/synthase, CODH/ACS complex subunit delta [EC:2.1.1.245]								Meg19_1012_Bin_459_scaffold_263_53		M8-62_Bin_262_scaffold_161666_8,M8-62_Bin_262_scaffold_60339_1	GCA_003599535_scaffold_7_17	GCA_005223185_scaffold_8_38																			Meg22_46_Bin_210_scaffold_94267_1				Meg22_46_Bin_89_scaffold_28088_5			BHB10-38_Bin_9_scaffold_238906_1	M3-30_Bin_374_scaffold_2365_29	SY70-4-3_Bin_44_scaffold_106518_2
	Formate formation	fdhA	K05299	formate dehydrogenase (NADP+) alpha subunit [EC:1.17.1.10]
		fdhB	K15022	formate dehydrogenase (NADP+) beta subunit [EC:1.17.1.10]	Meg22_810_Bin_217_scaffold_72851_2		GCA_002127415_scaffold_360_11,GCA_002127415_scaffold_223_2			Meg22_1416_Bin_86_scaffold_68437_1		Meg19_1012_Bin_459_scaffold_6041_10				GCA_005223185_scaffold_4_126,GCA_005223185_scaffold_4_176		Meg19_1012_Bin_119_scaffold_12773_7		Meg22_02_Bin_84_scaffold_223719_5						M8-62_Bin_326_scaffold_43478_3			BHB10-2_Bin_362_scaffold_155536_4	M3-10_Bin_262_scaffold_41229_5	M3-22_Bin_282_scaffold_94046_4	M3-44_Bin_119_scaffold_978_59			Meg22_46_Bin_210_scaffold_304485_1	Meg22_1012_Bin_348_scaffold_24533_2	Meg22_1214_Bin_176_scaffold_19448_14	Meg22_1214_Bin_137_scaffold_33620_6	Meg22_46_Bin_89_scaffold_37162_3		BHB10-38_Bin_186_scaffold_30231_9,BHB10-38_Bin_186_scaffold_50739_1	BHB10-38_Bin_9_scaffold_36563_8	M3-30_Bin_374_scaffold_1506_5,M3-30_Bin_374_scaffold_381_17	SY70-4-3_Bin_44_scaffold_16908_3	SY70-4-3_Bin_59_scaffold_17237_4	Meg19_02_Bin_5_scaffold_20780_2,Meg19_02_Bin_5_scaffold_10650_7			Meg22_46_Bin_45_scaffold_279940_2
		fdhF	K22015	formate dehydrogenase (hydrogenase) [EC:1.17.98.4 1.17.98.-]
		hydA2	K25123	iron hydrogenase HydA2 [EC:1.12.7.-]
		hycB	K25124	FeS-containing electron transfer protein
	formyl-tetrahydrofolate synthase	fhs	K01938	formate--tetrahydrofolate ligase [EC:6.3.4.3]						Meg22_1416_Bin_86_scaffold_116601_1														M3-38_Bin_215_scaffold_443110_1																	BHB10-38_Bin_186_scaffold_368127_1							Meg19_46_Bin_228_scaffold_113405_1
	methylene-tetrahydrofolate dehydrogenase/cyclohydrolase	folD	K01491	methylenetetrahydrofolate dehydrogenase (NADP+) / methenyltetrahydrofolate cyclohydrolase [EC:1.5.1.5 3.5.4.9]	Meg22_810_Bin_217_scaffold_136561_2	Meg19_1012_Bin_198_scaffold_2835_27	GCA_002127415_scaffold_313_5	Ga0186947_scaffold_1001_25	Ga0170695_scaffold_1117_2	Meg22_1416_Bin_86_scaffold_126458_2	Meg22_46_Bin_23_scaffold_49864_4	Meg19_1012_Bin_459_scaffold_247_22		M8-62_Bin_262_scaffold_297907_3		GCA_005223185_scaffold_12_180	Meg22_46_Bin_11_scaffold_100887_5	Meg19_1012_Bin_119_scaffold_6483_14	Meg19_46_Bin_239_scaffold_50325_5	Meg22_02_Bin_84_scaffold_19461_5	Meg19_46_Bin_60_scaffold_56165_7	Meg22_24_Bin_124_scaffold_13279_9	Meg22_46_Bin_213_scaffold_11928_2	M3-38_Bin_215_scaffold_48783_2	M8-62_Bin_157_scaffold_7133_4	M8-62_Bin_326_scaffold_124607_2	SY70-4-11_Bin_40_scaffold_78821_3	AB_03_Bin_160_scaffold_4910_2	BHB10-2_Bin_362_scaffold_272932_1		M3-22_Bin_282_scaffold_31544_12	M3-44_Bin_119_scaffold_1301_41		LQ108M_Bin_12_scaffold_2_417	Meg22_46_Bin_210_scaffold_21033_7		Meg22_1214_Bin_176_scaffold_66191_4		Meg22_46_Bin_89_scaffold_6133_6	Meg22_24_Bin_129_scaffold_542_24	BHB10-38_Bin_186_scaffold_193198_3		M3-30_Bin_374_scaffold_8455_9	SY70-4-3_Bin_44_scaffold_37864_4	SY70-4-3_Bin_59_scaffold_33830_2	Meg19_02_Bin_5_scaffold_59941_3	ex4484_8_scaffold_1367_8		Meg22_46_Bin_45_scaffold_18315_7
		fchA	K01500	methenyltetrahydrofolate cyclohydrolase [EC:3.5.4.9]		Meg19_1012_Bin_198_scaffold_12827_3	GCA_002127415_scaffold_312_7	Ga0186947_scaffold_1025_10				Meg19_1012_Bin_459_scaffold_284_146		M8-62_Bin_262_scaffold_82326_3	GCA_003599535_scaffold_99_12	GCA_005223185_scaffold_12_317	Meg22_46_Bin_11_scaffold_70877_2	Meg19_1012_Bin_119_scaffold_9303_3	Meg19_46_Bin_239_scaffold_37820_3	Meg22_02_Bin_84_scaffold_26360_4	Meg19_46_Bin_60_scaffold_61747_3	Meg22_24_Bin_124_scaffold_77464_5					SY70-4-11_Bin_40_scaffold_22887_2	AB_03_Bin_160_scaffold_6983_2					GCA_003820615_scaffold_412_2	LQ108M_Bin_12_scaffold_75_37										SY70-4-3_Bin_44_scaffold_108890_2		Meg19_02_Bin_5_scaffold_34418_4,Meg19_02_Bin_5_scaffold_81142_1,Meg19_02_Bin_5_scaffold_99172_6	ex4484_8_scaffold_616_18	Meg19_46_Bin_228_scaffold_13685_3	Meg22_46_Bin_45_scaffold_272082_3
	methylene-tetrahydrofolate reductase	metF, MTHFR	K00297	methylenetetrahydrofolate reductase (NADH) [EC:1.5.1.54]		Meg19_1012_Bin_198_scaffold_15989_3	GCA_002127415_scaffold_343_6			Meg22_1416_Bin_86_scaffold_148613_2		Meg19_1012_Bin_459_scaffold_3390_14	M3-44_Bin_198_scaffold_88401_2,M3-44_Bin_198_scaffold_282672_1,M3-44_Bin_198_scaffold_68404_1	M8-62_Bin_262_scaffold_6244_5,M8-62_Bin_262_scaffold_283645_1		GCA_005223185_scaffold_16_13				Meg22_02_Bin_84_scaffold_28595_7	Meg19_46_Bin_60_scaffold_95133_2	Meg22_24_Bin_124_scaffold_59863_2	Meg22_46_Bin_213_scaffold_84627_3						BHB10-2_Bin_362_scaffold_71716_3	M3-10_Bin_262_scaffold_66050_3	M3-22_Bin_282_scaffold_57116_4	M3-44_Bin_119_scaffold_10411_10	GCA_003820615_scaffold_520_1	LQ108M_Bin_12_scaffold_2_269		Meg22_1012_Bin_348_scaffold_87242_2	Meg22_1214_Bin_176_scaffold_23823_10	Meg22_1214_Bin_137_scaffold_107778_2				BHB10-38_Bin_9_scaffold_100874_2					ex4484_8_scaffold_10129_4		Meg22_46_Bin_45_scaffold_129711_2
		metV	K25007	methylenetetrahydrofolate reductase (NADH) small subunit
		rnfC2	K25008	ion-translocating oxidoreductase complex subunit C [EC:7.-.-.-]
	methyltransferase	acsE	K15023	5-methyltetrahydrofolate corrinoid/iron sulfur protein methyltransferase [EC:2.1.1.258]
Wood-Ljundahl Pathway (Methanogenesis)	acetyl-CoA synthase	cdhC	K00193	acetyl-CoA decarbonylase/synthase, CODH/ACS complex subunit beta [EC:2.3.1.169]
		cdhB	K00195	anaerobic carbon-monoxide dehydrogenase, CODH/ACS complex subunit epsilon
		cdhA	K00192	anaerobic carbon-monoxide dehydrogenase, CODH/ACS complex subunit alpha [EC:1.2.7.4]
	formylmethanofuran dehydrogenase	fwdA, fmdA	K00200	formylmethanofuran dehydrogenase subunit A [EC:1.2.7.12]
		fwdB, fmdB	K00201	formylmethanofuran dehydrogenase subunit B [EC:1.2.7.12]
		fwdC, fmdC	K00202	formylmethanofuran dehydrogenase subunit C [EC:1.2.7.12]
		fwdD, fmdD	K00203	formylmethanofuran dehydrogenase subunit D [EC:1.2.7.12]
		fwdE, fmdE	K11261	formylmethanofuran dehydrogenase subunit E [EC:1.2.7.12]		Meg19_1012_Bin_198_scaffold_5222_3					Meg22_46_Bin_23_scaffold_41501_5,Meg22_46_Bin_23_scaffold_6210_8	Meg19_1012_Bin_459_scaffold_16040_10,Meg19_1012_Bin_459_scaffold_563_42			GCA_003599535_scaffold_32_29	GCA_005223185_scaffold_7_220																				Meg22_1012_Bin_348_scaffold_31894_4	Meg22_1214_Bin_176_scaffold_85690_4	Meg22_1214_Bin_137_scaffold_178813_8	Meg22_46_Bin_89_scaffold_16817_4	Meg22_24_Bin_129_scaffold_2535_9	BHB10-38_Bin_186_scaffold_51184_2	BHB10-38_Bin_9_scaffold_74216_12					ex4484_8_scaffold_1072_14,ex4484_8_scaffold_1708_13
	formylmethanofuran:H4MPT formyltransferase	ftr	K00672	formylmethanofuran--tetrahydromethanopterin N-formyltransferase [EC:2.3.1.101]
	methenyl-H4MPT cyclohydrolase	mch	K01499	methenyltetrahydromethanopterin cyclohydrolase [EC:3.5.4.27]
	methylenetetrahydromethanopterin dehydrogenase	mtd	K00319	methylenetetrahydromethanopterin dehydrogenase [EC:1.5.98.1]	Meg22_810_Bin_217_scaffold_82076_3
	Methylene-H3MPT reductase	mer	K00320	5,10-methylenetetrahydromethanopterin reductase [EC:1.5.98.2]						Meg22_1416_Bin_86_scaffold_98549_3
Reductive Glycine Pathway (rGlyP)	Glycine cleavage/synthase system (GCS)	gcvPA	K00282	glycine dehydrogenase subunit 1 [EC:1.4.4.2]	Meg22_810_Bin_217_scaffold_211239_1,Meg22_810_Bin_217_scaffold_21820_14	Meg19_1012_Bin_198_scaffold_16522_11	GCA_002127415_scaffold_222_24	Ga0186947_scaffold_1004_33	Ga0170695_scaffold_1066_2			Meg19_1012_Bin_459_scaffold_35140_1		M8-62_Bin_262_scaffold_13680_8	GCA_003599535_scaffold_112_1	GCA_005223185_scaffold_12_342		Meg19_1012_Bin_119_scaffold_9252_13	Meg19_46_Bin_239_scaffold_33864_2		Meg19_46_Bin_60_scaffold_64436_7	Meg22_24_Bin_124_scaffold_41448_5	Meg22_46_Bin_213_scaffold_15193_7	M3-38_Bin_215_scaffold_472678_2	M8-62_Bin_157_scaffold_19430_8		SY70-4-11_Bin_40_scaffold_1461_6	AB_03_Bin_160_scaffold_180432_3		M3-10_Bin_262_scaffold_35845_3	M3-22_Bin_282_scaffold_4887_4	M3-44_Bin_119_scaffold_3580_2	GCA_003820615_scaffold_566_4	LQ108M_Bin_12_scaffold_29_221	Meg22_46_Bin_210_scaffold_299079_1	Meg22_1012_Bin_348_scaffold_33817_5	Meg22_1214_Bin_176_scaffold_723_26	Meg22_1214_Bin_137_scaffold_83098_5	Meg22_46_Bin_89_scaffold_4230_6			BHB10-38_Bin_9_scaffold_129739_4,BHB10-38_Bin_9_scaffold_15909_13	M3-30_Bin_374_scaffold_471_18		SY70-4-3_Bin_59_scaffold_15902_2		ex4484_8_scaffold_1222_12		Meg22_46_Bin_45_scaffold_44687_2
		gcvPB	K00283	glycine dehydrogenase subunit 2 [EC:1.4.4.2]		Meg19_1012_Bin_198_scaffold_1026_1	GCA_002127415_scaffold_304_5	Ga0186947_scaffold_1006_32	Ga0170695_scaffold_1017_16			Meg19_1012_Bin_459_scaffold_3390_5		M8-62_Bin_262_scaffold_32830_2	GCA_003599535_scaffold_1_67	GCA_005223185_scaffold_16_21		Meg19_1012_Bin_119_scaffold_182713_1,Meg19_1012_Bin_119_scaffold_9252_14			Meg19_46_Bin_60_scaffold_64436_5	Meg22_24_Bin_124_scaffold_184304_5	Meg22_46_Bin_213_scaffold_15193_8		M8-62_Bin_157_scaffold_19430_9,M8-62_Bin_157_scaffold_372294_2	M8-62_Bin_326_scaffold_77300_2	SY70-4-11_Bin_40_scaffold_11253_2,SY70-4-11_Bin_40_scaffold_1461_7		BHB10-2_Bin_362_scaffold_79050_6	M3-10_Bin_262_scaffold_35845_4	M3-22_Bin_282_scaffold_4887_5	M3-44_Bin_119_scaffold_3580_1	GCA_003820615_scaffold_566_3	LQ108M_Bin_12_scaffold_29_222	Meg22_46_Bin_210_scaffold_87916_1	Meg22_1012_Bin_348_scaffold_33817_6	Meg22_1214_Bin_176_scaffold_723_27	Meg22_1214_Bin_137_scaffold_83098_4	Meg22_46_Bin_89_scaffold_4230_7			BHB10-38_Bin_9_scaffold_129739_3,BHB10-38_Bin_9_scaffold_15909_12	M3-30_Bin_374_scaffold_471_19				ex4484_8_scaffold_1222_11		Meg22_46_Bin_45_scaffold_44687_1
		gcvT, AMT	K00605	aminomethyltransferase [EC:2.1.2.10]		Meg19_1012_Bin_198_scaffold_4618_20	GCA_002127415_scaffold_137_3	Ga0186947_scaffold_1081_4		Meg22_1416_Bin_86_scaffold_23888_7		Meg19_1012_Bin_459_scaffold_187_40		M8-62_Bin_262_scaffold_26877_9	GCA_003599535_scaffold_59_17	GCA_005223185_scaffold_1_177		Meg19_1012_Bin_119_scaffold_36988_3	Meg19_46_Bin_239_scaffold_27736_5		Meg19_46_Bin_60_scaffold_245943_2	Meg22_24_Bin_124_scaffold_21272_2	Meg22_46_Bin_213_scaffold_188717_1	M3-38_Bin_215_scaffold_120393_3	M8-62_Bin_157_scaffold_58415_4			AB_03_Bin_160_scaffold_3714_15	BHB10-2_Bin_362_scaffold_135174_3		M3-22_Bin_282_scaffold_242529_3,M3-22_Bin_282_scaffold_37896_6,M3-22_Bin_282_scaffold_4887_2	M3-44_Bin_119_scaffold_3580_4	GCA_003820615_scaffold_566_6	LQ108M_Bin_12_scaffold_29_219,LQ108M_Bin_12_scaffold_89_211	Meg22_46_Bin_210_scaffold_95517_1	Meg22_1012_Bin_348_scaffold_33817_3	Meg22_1214_Bin_176_scaffold_723_24	Meg22_1214_Bin_137_scaffold_125018_2	Meg22_46_Bin_89_scaffold_4230_4	Meg22_24_Bin_129_scaffold_17873_5	BHB10-38_Bin_186_scaffold_330116_2	BHB10-38_Bin_9_scaffold_15909_15	M3-30_Bin_374_scaffold_471_16		SY70-4-3_Bin_59_scaffold_15902_4	Meg19_02_Bin_5_scaffold_78304_2	ex4484_8_scaffold_1222_14		Meg22_46_Bin_45_scaffold_44687_4
		DLD, lpd, pdhD	K00382	dihydrolipoamide dehydrogenase [EC:1.8.1.4]		Meg19_1012_Bin_198_scaffold_242_53,Meg19_1012_Bin_198_scaffold_9858_7	GCA_002127415_scaffold_357_3	Ga0186947_scaffold_1044_6	Ga0170695_scaffold_1004_21		Meg22_46_Bin_23_scaffold_265305_1	Meg19_1012_Bin_459_scaffold_2527_9,Meg19_1012_Bin_459_scaffold_7079_15		M8-62_Bin_262_scaffold_65955_9	GCA_003599535_scaffold_2_84	GCA_005223185_scaffold_6_27,GCA_005223185_scaffold_7_77	Meg22_46_Bin_11_scaffold_13483_8	Meg19_1012_Bin_119_scaffold_13224_4,Meg19_1012_Bin_119_scaffold_8212_5	Meg19_46_Bin_239_scaffold_120758_3,Meg19_46_Bin_239_scaffold_92487_10		Meg19_46_Bin_60_scaffold_46929_1	Meg22_24_Bin_124_scaffold_177418_2,Meg22_24_Bin_124_scaffold_226376_3			M8-62_Bin_157_scaffold_101509_4,M8-62_Bin_157_scaffold_2843_16		SY70-4-11_Bin_40_scaffold_27664_1		BHB10-2_Bin_362_scaffold_81027_7	M3-10_Bin_262_scaffold_68548_5	M3-22_Bin_282_scaffold_9829_7	M3-44_Bin_119_scaffold_3859_26	GCA_003820615_scaffold_744_2	LQ108M_Bin_12_scaffold_75_121		Meg22_1012_Bin_348_scaffold_72704_5	Meg22_1214_Bin_176_scaffold_25418_12	Meg22_1214_Bin_137_scaffold_20273_12	Meg22_46_Bin_89_scaffold_4642_5	Meg22_24_Bin_129_scaffold_93407_2		BHB10-38_Bin_9_scaffold_128692_3	M3-30_Bin_374_scaffold_1200_5	SY70-4-3_Bin_44_scaffold_36494_2	SY70-4-3_Bin_59_scaffold_40603_2	Meg19_02_Bin_5_scaffold_60918_3		Meg19_46_Bin_228_scaffold_12362_8	Meg22_46_Bin_45_scaffold_230053_1
	Glycine to Serine	glyA, SHMT	K00600	glycine hydroxymethyltransferase [EC:2.1.2.1]	Meg22_810_Bin_217_scaffold_84674_2	Meg19_1012_Bin_198_scaffold_225203_1,Meg19_1012_Bin_198_scaffold_4241_1	GCA_002127415_scaffold_204_2	Ga0186947_scaffold_1003_10				Meg19_1012_Bin_459_scaffold_3639_16		M8-62_Bin_262_scaffold_327880_1	GCA_003599535_scaffold_1_55	GCA_005223185_scaffold_18_11	Meg22_46_Bin_11_scaffold_91193_5	Meg19_1012_Bin_119_scaffold_19495_3	Meg19_46_Bin_239_scaffold_231232_2	Meg22_02_Bin_84_scaffold_406748_4	Meg19_46_Bin_60_scaffold_249272_1,Meg19_46_Bin_60_scaffold_87665_1	Meg22_24_Bin_124_scaffold_90879_4	Meg22_46_Bin_213_scaffold_28495_20	M3-38_Bin_215_scaffold_292972_1	M8-62_Bin_157_scaffold_61682_5,M8-62_Bin_157_scaffold_67932_10	M8-62_Bin_326_scaffold_476198_4	SY70-4-11_Bin_40_scaffold_19244_6	AB_03_Bin_160_scaffold_8711_10	BHB10-2_Bin_362_scaffold_46619_4	M3-10_Bin_262_scaffold_23084_10	M3-22_Bin_282_scaffold_46370_4	M3-44_Bin_119_scaffold_1941_43		LQ108M_Bin_12_scaffold_29_202		Meg22_1012_Bin_348_scaffold_146668_1	Meg22_1214_Bin_176_scaffold_76345_5,Meg22_1214_Bin_176_scaffold_98925_1	Meg22_1214_Bin_137_scaffold_152137_1	Meg22_46_Bin_89_scaffold_177507_1	Meg22_24_Bin_129_scaffold_22139_4	BHB10-38_Bin_186_scaffold_41184_2	BHB10-38_Bin_9_scaffold_12050_6	M3-30_Bin_374_scaffold_1398_24		SY70-4-3_Bin_59_scaffold_40195_2	Meg19_02_Bin_5_scaffold_21083_1	ex4484_8_scaffold_1457_6	Meg19_46_Bin_228_scaffold_19855_9	Meg22_46_Bin_45_scaffold_118967_5
		AGXT	K00830	alanine-glyoxylate transaminase / serine-glyoxylate transaminase / serine-pyruvate transaminase [EC:2.6.1.44 2.6.1.45 2.6.1.51]								Meg19_1012_Bin_459_scaffold_150_27				GCA_005223185_scaffold_16_257	Meg22_46_Bin_11_scaffold_23868_9	Meg19_1012_Bin_119_scaffold_12333_12	Meg19_46_Bin_239_scaffold_35539_2		Meg19_46_Bin_60_scaffold_28755_2	Meg22_24_Bin_124_scaffold_77584_2	Meg22_46_Bin_213_scaffold_8692_18		M8-62_Bin_157_scaffold_36674_3		SY70-4-11_Bin_40_scaffold_35700_2									Meg22_1012_Bin_348_scaffold_60981_3		Meg22_1214_Bin_137_scaffold_61973_3				BHB10-38_Bin_9_scaffold_166927_3
	Serine to pyruvate	E4.3.1.19, ilvA, tdcB	K01754	threonine dehydratase [EC:4.3.1.19]									M3-44_Bin_198_scaffold_415131_1				Meg22_46_Bin_11_scaffold_50508_3	Meg19_1012_Bin_119_scaffold_24591_3,Meg19_1012_Bin_119_scaffold_6928_10	Meg19_46_Bin_239_scaffold_123041_1,Meg19_46_Bin_239_scaffold_79121_3	Meg22_02_Bin_84_scaffold_15826_3,Meg22_02_Bin_84_scaffold_215564_3	Meg19_46_Bin_60_scaffold_109433_3	Meg22_24_Bin_124_scaffold_308589_4,Meg22_24_Bin_124_scaffold_3726_4	Meg22_46_Bin_213_scaffold_4034_17	M3-38_Bin_215_scaffold_68912_1	M8-62_Bin_157_scaffold_192537_2,M8-62_Bin_157_scaffold_311144_1		SY70-4-11_Bin_40_scaffold_5896_6	AB_03_Bin_160_scaffold_10694_4	BHB10-2_Bin_362_scaffold_451335_2	M3-10_Bin_262_scaffold_126077_4,M3-10_Bin_262_scaffold_177035_2	M3-22_Bin_282_scaffold_16316_2,M3-22_Bin_282_scaffold_22898_3	M3-44_Bin_119_scaffold_3580_19		LQ108M_Bin_12_scaffold_12_290	Meg22_46_Bin_210_scaffold_333661_1								M3-30_Bin_374_scaffold_460_8					Meg19_46_Bin_228_scaffold_58931_6	Meg22_46_Bin_45_scaffold_23180_6
		E4.3.1.17, sdaA, sdaB, tdcG	K01752	L-serine dehydratase [EC:4.3.1.17]														Meg19_1012_Bin_119_scaffold_3672_18	Meg19_46_Bin_239_scaffold_15097_6	Meg22_02_Bin_84_scaffold_95380_3	Meg19_46_Bin_60_scaffold_203020_2	Meg22_24_Bin_124_scaffold_534623_2	Meg22_46_Bin_213_scaffold_17878_7				SY70-4-11_Bin_40_scaffold_28998_2
		SDS, SDH, CHA1	K17989	L-serine/L-threonine ammonia-lyase [EC:4.3.1.17 4.3.1.19]
Ribulose Monophosphate Pathway	3-hexulose-6-phosphate synthase	hxlA	K08093	3-hexulose-6-phosphate synthase [EC:4.1.2.43]
		hps-phi	K13831	3-hexulose-6-phosphate synthase / 6-phospho-3-hexuloisomerase [EC:4.1.2.43 5.3.1.27]									M3-44_Bin_198_scaffold_10667_10
	6-phospho-3-hexuloisomerase	hxlB	K08094	6-phospho-3-hexuloisomerase [EC:5.3.1.27]
Fatty Acid Degradation	Long-chain fatty acid CoA ligation	ACSL, fadD	K01897	long-chain acyl-CoA synthetase [EC:6.2.1.3]	Meg22_810_Bin_217_scaffold_16038_5,Meg22_810_Bin_217_scaffold_33921_3	Meg19_1012_Bin_198_scaffold_26590_9	GCA_002127415_scaffold_14_9	Ga0186947_scaffold_1024_10,Ga0186947_scaffold_1024_5		Meg22_1416_Bin_86_scaffold_51717_3	Meg22_46_Bin_23_scaffold_40065_4	Meg19_1012_Bin_459_scaffold_2560_61,Meg19_1012_Bin_459_scaffold_563_53	M3-44_Bin_198_scaffold_199232_4	M8-62_Bin_262_scaffold_208555_2,M8-62_Bin_262_scaffold_50422_9	GCA_003599535_scaffold_86_14	GCA_005223185_scaffold_12_446,GCA_005223185_scaffold_7_50		Meg19_1012_Bin_119_scaffold_6483_6	Meg19_46_Bin_239_scaffold_65223_5	Meg22_02_Bin_84_scaffold_8529_7	Meg19_46_Bin_60_scaffold_66347_2	Meg22_24_Bin_124_scaffold_17184_6,Meg22_24_Bin_124_scaffold_20156_7,Meg22_24_Bin_124_scaffold_4524_6	Meg22_46_Bin_213_scaffold_30078_8,Meg22_46_Bin_213_scaffold_8637_14,Meg22_46_Bin_213_scaffold_22624_8	M3-38_Bin_215_scaffold_224451_1	M8-62_Bin_157_scaffold_15827_11,M8-62_Bin_157_scaffold_7133_12	M8-62_Bin_326_scaffold_114196_2	SY70-4-11_Bin_40_scaffold_6337_4	AB_03_Bin_160_scaffold_15442_6	BHB10-2_Bin_362_scaffold_109246_2,BHB10-2_Bin_362_scaffold_23111_11,BHB10-2_Bin_362_scaffold_23111_14	M3-10_Bin_262_scaffold_43817_3,M3-10_Bin_262_scaffold_54260_2,M3-10_Bin_262_scaffold_43817_2	M3-22_Bin_282_scaffold_27756_2,M3-22_Bin_282_scaffold_40970_6,M3-22_Bin_282_scaffold_43131_2,M3-22_Bin_282_scaffold_27756_3	M3-44_Bin_119_scaffold_1941_38,M3-44_Bin_119_scaffold_1941_39	GCA_003820615_scaffold_759_2	LQ108M_Bin_12_scaffold_288_91						Meg22_24_Bin_129_scaffold_277110_1	BHB10-38_Bin_186_scaffold_89152_6	BHB10-38_Bin_9_scaffold_8025_7			SY70-4-3_Bin_59_scaffold_24766_3		ex4484_8_scaffold_4803_9	Meg19_46_Bin_228_scaffold_82828_1	Meg22_46_Bin_45_scaffold_84682_1
		ACSBG	K15013	long-chain-fatty-acid--CoA ligase ACSBG [EC:6.2.1.3]
		ACSM	K01896	medium-chain acyl-CoA synthetase [EC:6.2.1.2]												GCA_005223185_scaffold_12_130
		ACSM1, LAE	K23756	medium-chain acyl-CoA ligase / lipoate-activating enzyme [EC:6.2.1.2]
	Long-chain fatty acid CoA transportation	CPT1A	K08765	carnitine O-palmitoyltransferase 1, liver isoform [EC:2.3.1.21]
		CPT1B	K19523	carnitine O-palmitoyltransferase 1, muscle isoform [EC:2.3.1.21]
		CPT1C	K19524	carnitine O-palmitoyltransferase 1, brain isoform [EC:2.3.1.21]
		CPT6	K08766	carnitine O-palmitoyltransferase 2 [EC:2.3.1.21]
		fadL	K06076	long-chain fatty acid transport protein				Ga0186947_scaffold_1005_5		Meg22_1416_Bin_86_scaffold_44370_6		Meg19_1012_Bin_459_scaffold_3580_12,Meg19_1012_Bin_459_scaffold_3639_13	M3-44_Bin_198_scaffold_102875_3,M3-44_Bin_198_scaffold_151226_1	M8-62_Bin_262_scaffold_61302_4,M8-62_Bin_262_scaffold_97797_3	GCA_003599535_scaffold_1_52	GCA_005223185_scaffold_7_344	Meg22_46_Bin_11_scaffold_200278_2	Meg19_1012_Bin_119_scaffold_197101_5	Meg19_46_Bin_239_scaffold_150129_3	Meg22_02_Bin_84_scaffold_91772_2	Meg19_46_Bin_60_scaffold_284013_1	Meg22_24_Bin_124_scaffold_26535_11		M3-38_Bin_215_scaffold_182393_2,M3-38_Bin_215_scaffold_27608_8	M8-62_Bin_157_scaffold_36236_1,M8-62_Bin_157_scaffold_366621_2			AB_03_Bin_160_scaffold_31595_1,AB_03_Bin_160_scaffold_88058_2	BHB10-2_Bin_362_scaffold_151772_8,BHB10-2_Bin_362_scaffold_41520_10,BHB10-2_Bin_362_scaffold_88694_9	M3-10_Bin_262_scaffold_41066_5	M3-22_Bin_282_scaffold_151075_1,M3-22_Bin_282_scaffold_59105_3,M3-22_Bin_282_scaffold_5994_14	M3-44_Bin_119_scaffold_2346_14	GCA_003820615_scaffold_764_4	LQ108M_Bin_12_scaffold_288_98,LQ108M_Bin_12_scaffold_2_148,LQ108M_Bin_12_scaffold_2_215	Meg22_46_Bin_210_scaffold_113769_2	Meg22_1012_Bin_348_scaffold_15401_4	Meg22_1214_Bin_176_scaffold_134761_3	Meg22_1214_Bin_137_scaffold_19803_10,Meg22_1214_Bin_137_scaffold_30948_7	Meg22_46_Bin_89_scaffold_143524_3,Meg22_46_Bin_89_scaffold_146394_1,Meg22_46_Bin_89_scaffold_38381_3	Meg22_24_Bin_129_scaffold_27395_6,Meg22_24_Bin_129_scaffold_3580_2	BHB10-38_Bin_186_scaffold_201830_2	BHB10-38_Bin_9_scaffold_120566_1,BHB10-38_Bin_9_scaffold_153773_2,BHB10-38_Bin_9_scaffold_23966_2	M3-30_Bin_374_scaffold_2550_51,M3-30_Bin_374_scaffold_2839_3,M3-30_Bin_374_scaffold_56538_1		SY70-4-3_Bin_59_scaffold_61156_2	Meg19_02_Bin_5_scaffold_113236_5,Meg19_02_Bin_5_scaffold_129260_2,Meg19_02_Bin_5_scaffold_81081_3	ex4484_8_scaffold_3592_5,ex4484_8_scaffold_3729_11	Meg19_46_Bin_228_scaffold_153073_1,Meg19_46_Bin_228_scaffold_160048_4,Meg19_46_Bin_228_scaffold_225961_2	Meg22_46_Bin_45_scaffold_100832_3,Meg22_46_Bin_45_scaffold_94801_6
	acyl-CoA dehydrogenase	E1.3.3.6, ACOX1, ACOX3	K00232	acyl-CoA oxidase [EC:1.3.3.6]
		fadE	K06445	acyl-CoA dehydrogenase [EC:1.3.99.-]
		ACADM, acd	K00249	acyl-CoA dehydrogenase [EC:1.3.8.7]	Meg22_810_Bin_217_scaffold_18020_5,Meg22_810_Bin_217_scaffold_18020_9	Meg19_1012_Bin_198_scaffold_14744_4,Meg19_1012_Bin_198_scaffold_14744_7,Meg19_1012_Bin_198_scaffold_1620_36,Meg19_1012_Bin_198_scaffold_4988_4	GCA_002127415_scaffold_293_1,GCA_002127415_scaffold_296_5,GCA_002127415_scaffold_345_9,GCA_002127415_scaffold_53_10	Ga0186947_scaffold_1001_50,Ga0186947_scaffold_1001_54,Ga0186947_scaffold_1123_3	Ga0170695_scaffold_1002_15,Ga0170695_scaffold_1013_23		Meg22_46_Bin_23_scaffold_20955_9,Meg22_46_Bin_23_scaffold_243387_1	Meg19_1012_Bin_459_scaffold_263_19,Meg19_1012_Bin_459_scaffold_5327_1,Meg19_1012_Bin_459_scaffold_537_54,Meg19_1012_Bin_459_scaffold_537_58,Meg19_1012_Bin_459_scaffold_6041_13	M3-44_Bin_198_scaffold_114127_2,M3-44_Bin_198_scaffold_217558_4,M3-44_Bin_198_scaffold_259035_4	M8-62_Bin_262_scaffold_13149_4,M8-62_Bin_262_scaffold_13149_8,M8-62_Bin_262_scaffold_196598_3,M8-62_Bin_262_scaffold_41688_14,M8-62_Bin_262_scaffold_77634_2	GCA_003599535_scaffold_10_24,GCA_003599535_scaffold_115_10,GCA_003599535_scaffold_115_6,GCA_003599535_scaffold_116_3	GCA_005223185_scaffold_12_61,GCA_005223185_scaffold_12_65,GCA_005223185_scaffold_17_49,GCA_005223185_scaffold_4_122,GCA_005223185_scaffold_7_393	Meg22_46_Bin_11_scaffold_40431_1,Meg22_46_Bin_11_scaffold_40431_5,Meg22_46_Bin_11_scaffold_50508_2	Meg19_1012_Bin_119_scaffold_1690_11,Meg19_1012_Bin_119_scaffold_1690_7,Meg19_1012_Bin_119_scaffold_6928_9	Meg19_46_Bin_239_scaffold_102561_1,Meg19_46_Bin_239_scaffold_123041_2,Meg19_46_Bin_239_scaffold_24479_5,Meg19_46_Bin_239_scaffold_70128_2	Meg22_02_Bin_84_scaffold_15826_4,Meg22_02_Bin_84_scaffold_75170_3	Meg19_46_Bin_60_scaffold_54044_4,Meg19_46_Bin_60_scaffold_90807_2	Meg22_24_Bin_124_scaffold_3726_5,Meg22_24_Bin_124_scaffold_4524_12,Meg22_24_Bin_124_scaffold_76367_2,Meg22_24_Bin_124_scaffold_76367_6	Meg22_46_Bin_213_scaffold_247780_3,Meg22_46_Bin_213_scaffold_292905_1,Meg22_46_Bin_213_scaffold_4034_18		M8-62_Bin_157_scaffold_19785_12,M8-62_Bin_157_scaffold_19785_8,M8-62_Bin_157_scaffold_20642_12	M8-62_Bin_326_scaffold_134871_1	SY70-4-11_Bin_40_scaffold_31703_2,SY70-4-11_Bin_40_scaffold_5896_5	AB_03_Bin_160_scaffold_3714_13,AB_03_Bin_160_scaffold_42987_6,AB_03_Bin_160_scaffold_52838_3	BHB10-2_Bin_362_scaffold_117787_3,BHB10-2_Bin_362_scaffold_18493_15,BHB10-2_Bin_362_scaffold_19438_3	M3-10_Bin_262_scaffold_287395_2,M3-10_Bin_262_scaffold_144989_4,M3-10_Bin_262_scaffold_64816_7,M3-10_Bin_262_scaffold_98562_1	M3-22_Bin_282_scaffold_1801_10,M3-22_Bin_282_scaffold_198392_2,M3-22_Bin_282_scaffold_35267_5,M3-22_Bin_282_scaffold_8062_9,M3-22_Bin_282_scaffold_95298_3	M3-44_Bin_119_scaffold_11043_13,M3-44_Bin_119_scaffold_2863_22,M3-44_Bin_119_scaffold_6536_29,M3-44_Bin_119_scaffold_6996_7,M3-44_Bin_119_scaffold_822_31	GCA_003820615_scaffold_132_1,GCA_003820615_scaffold_817_5	LQ108M_Bin_12_scaffold_17_187,LQ108M_Bin_12_scaffold_29_217,LQ108M_Bin_12_scaffold_2_465,LQ108M_Bin_12_scaffold_89_122	Meg22_46_Bin_210_scaffold_189758_3,Meg22_46_Bin_210_scaffold_91096_3	Meg22_1012_Bin_348_scaffold_33240_3,Meg22_1012_Bin_348_scaffold_40014_3,Meg22_1012_Bin_348_scaffold_9364_10	Meg22_1214_Bin_176_scaffold_3507_4,Meg22_1214_Bin_176_scaffold_35885_9,Meg22_1214_Bin_176_scaffold_40078_6	Meg22_1214_Bin_137_scaffold_6127_26,Meg22_1214_Bin_137_scaffold_81492_1,Meg22_1214_Bin_137_scaffold_92420_4	Meg22_46_Bin_89_scaffold_14514_4,Meg22_46_Bin_89_scaffold_23025_6,Meg22_46_Bin_89_scaffold_3387_11	Meg22_24_Bin_129_scaffold_13933_1,Meg22_24_Bin_129_scaffold_953_10	BHB10-38_Bin_186_scaffold_102364_3,BHB10-38_Bin_186_scaffold_69292_11	BHB10-38_Bin_9_scaffold_24503_11,BHB10-38_Bin_9_scaffold_76775_4	M3-30_Bin_374_scaffold_1320_17,M3-30_Bin_374_scaffold_1320_27,M3-30_Bin_374_scaffold_214_37	SY70-4-3_Bin_44_scaffold_73780_3	SY70-4-3_Bin_59_scaffold_119926_2,SY70-4-3_Bin_59_scaffold_15829_4	Meg19_02_Bin_5_scaffold_103434_2,Meg19_02_Bin_5_scaffold_113847_2,Meg19_02_Bin_5_scaffold_178319_2,Meg19_02_Bin_5_scaffold_37995_2	ex4484_8_scaffold_879_6,ex4484_8_scaffold_971_8	Meg19_46_Bin_228_scaffold_33479_3,Meg19_46_Bin_228_scaffold_47558_3,Meg19_46_Bin_228_scaffold_49771_3	Meg22_46_Bin_45_scaffold_140957_5,Meg22_46_Bin_45_scaffold_37336_2
		ACADL	K00255	long-chain-acyl-CoA dehydrogenase [EC:1.3.8.8]
		ACADVL	K09479	very long chain acyl-CoA dehydrogenase [EC:1.3.8.9]
		ACADSB	K09478	short-chain 2-methylacyl-CoA dehydrogenase [EC:1.3.8.5]
		ACADS, bcd	K00248	butyryl-CoA dehydrogenase [EC:1.3.8.1]	Meg22_810_Bin_217_scaffold_18020_5,Meg22_810_Bin_217_scaffold_18020_9	Meg19_1012_Bin_198_scaffold_14744_4,Meg19_1012_Bin_198_scaffold_14744_7	GCA_002127415_scaffold_293_1,GCA_002127415_scaffold_345_9	Ga0186947_scaffold_1001_50,Ga0186947_scaffold_1001_54	Ga0170695_scaffold_1002_15,Ga0170695_scaffold_1013_23			Meg19_1012_Bin_459_scaffold_537_54,Meg19_1012_Bin_459_scaffold_537_58	M3-44_Bin_198_scaffold_114127_2	M8-62_Bin_262_scaffold_13149_4,M8-62_Bin_262_scaffold_13149_8	GCA_003599535_scaffold_115_10,GCA_003599535_scaffold_115_6,GCA_003599535_scaffold_116_3	GCA_005223185_scaffold_12_61,GCA_005223185_scaffold_12_65	Meg22_46_Bin_11_scaffold_40431_1	Meg19_1012_Bin_119_scaffold_1690_11	Meg19_46_Bin_239_scaffold_24479_5	Meg22_02_Bin_84_scaffold_15826_4	Meg19_46_Bin_60_scaffold_54044_4	Meg22_24_Bin_124_scaffold_3726_5,Meg22_24_Bin_124_scaffold_76367_6	Meg22_46_Bin_213_scaffold_4034_18		M8-62_Bin_157_scaffold_19785_12,M8-62_Bin_157_scaffold_20642_12	M8-62_Bin_326_scaffold_134871_1	SY70-4-11_Bin_40_scaffold_31703_2				M3-22_Bin_282_scaffold_1801_10	M3-44_Bin_119_scaffold_11043_13			Meg22_46_Bin_210_scaffold_91096_3	Meg22_1012_Bin_348_scaffold_40014_3,Meg22_1012_Bin_348_scaffold_9364_10	Meg22_1214_Bin_176_scaffold_3507_4,Meg22_1214_Bin_176_scaffold_40078_6	Meg22_1214_Bin_137_scaffold_81492_1	Meg22_46_Bin_89_scaffold_14514_4,Meg22_46_Bin_89_scaffold_23025_6	Meg22_24_Bin_129_scaffold_13933_1	BHB10-38_Bin_186_scaffold_102364_3,BHB10-38_Bin_186_scaffold_69292_11	BHB10-38_Bin_9_scaffold_24503_11,BHB10-38_Bin_9_scaffold_76775_4	M3-30_Bin_374_scaffold_1320_17,M3-30_Bin_374_scaffold_1320_27	SY70-4-3_Bin_44_scaffold_73780_3	SY70-4-3_Bin_59_scaffold_15829_4	Meg19_02_Bin_5_scaffold_37995_2	ex4484_8_scaffold_971_8	Meg19_46_Bin_228_scaffold_33479_3,Meg19_46_Bin_228_scaffold_47558_3	Meg22_46_Bin_45_scaffold_37336_2
	enoyl-CoA hydratase	paaF, echA	K01692	enoyl-CoA hydratase [EC:4.2.1.17]		Meg19_1012_Bin_198_scaffold_31476_3	GCA_002127415_scaffold_168_3	Ga0186947_scaffold_1001_38	Ga0170695_scaffold_1085_4			Meg19_1012_Bin_459_scaffold_311_26	M3-44_Bin_198_scaffold_149342_1,M3-44_Bin_198_scaffold_76000_2	M8-62_Bin_262_scaffold_109697_3,M8-62_Bin_262_scaffold_24180_11	GCA_003599535_scaffold_77_7	GCA_005223185_scaffold_18_118,GCA_005223185_scaffold_4_152		Meg19_1012_Bin_119_scaffold_1690_12,Meg19_1012_Bin_119_scaffold_9511_15	Meg19_46_Bin_239_scaffold_24479_4,Meg19_46_Bin_239_scaffold_6977_2	Meg22_02_Bin_84_scaffold_75170_4	Meg19_46_Bin_60_scaffold_54044_5	Meg22_24_Bin_124_scaffold_4524_13	Meg22_46_Bin_213_scaffold_292905_2	M3-38_Bin_215_scaffold_185366_2	M8-62_Bin_157_scaffold_26944_1,M8-62_Bin_157_scaffold_19785_13,M8-62_Bin_157_scaffold_249014_2,M8-62_Bin_157_scaffold_249014_3		SY70-4-11_Bin_40_scaffold_31703_3,SY70-4-11_Bin_40_scaffold_663_13	AB_03_Bin_160_scaffold_30608_1,AB_03_Bin_160_scaffold_3875_7,AB_03_Bin_160_scaffold_83688_3,AB_03_Bin_160_scaffold_9903_7	BHB10-2_Bin_362_scaffold_107587_2,BHB10-2_Bin_362_scaffold_107587_9,BHB10-2_Bin_362_scaffold_18493_14,BHB10-2_Bin_362_scaffold_18887_11,BHB10-2_Bin_362_scaffold_59039_2,BHB10-2_Bin_362_scaffold_9299_9	M3-10_Bin_262_scaffold_49807_3,M3-10_Bin_262_scaffold_49807_9,M3-10_Bin_262_scaffold_64816_6,M3-10_Bin_262_scaffold_92995_2	M3-22_Bin_282_scaffold_11720_13,M3-22_Bin_282_scaffold_7234_11,M3-22_Bin_282_scaffold_8062_8	M3-44_Bin_119_scaffold_2615_10,M3-44_Bin_119_scaffold_4891_34,M3-44_Bin_119_scaffold_5235_7	GCA_003820615_scaffold_200_1	LQ108M_Bin_12_scaffold_140_123,LQ108M_Bin_12_scaffold_2_467	Meg22_46_Bin_210_scaffold_115641_4,Meg22_46_Bin_210_scaffold_279316_2		Meg22_1214_Bin_176_scaffold_13089_5,Meg22_1214_Bin_176_scaffold_77407_4	Meg22_1214_Bin_137_scaffold_6127_15	Meg22_46_Bin_89_scaffold_101396_4,Meg22_46_Bin_89_scaffold_23233_12	Meg22_24_Bin_129_scaffold_28510_4,Meg22_24_Bin_129_scaffold_55078_3	BHB10-38_Bin_186_scaffold_25401_8		M3-30_Bin_374_scaffold_1200_28,M3-30_Bin_374_scaffold_1320_3	SY70-4-3_Bin_44_scaffold_35950_1		Meg19_02_Bin_5_scaffold_190459_2	ex4484_8_scaffold_879_3,ex4484_8_scaffold_879_8		Meg22_46_Bin_45_scaffold_122773_2,Meg22_46_Bin_45_scaffold_140957_3
		MFP2	K10527	enoyl-CoA hydratase/3-hydroxyacyl-CoA dehydrogenase [EC:4.2.1.17 1.1.1.35 1.1.1.211]
		fadB	K01825	3-hydroxyacyl-CoA dehydrogenase / enoyl-CoA hydratase / 3-hydroxybutyryl-CoA epimerase / enoyl-CoA isomerase [EC:1.1.1.35 4.2.1.17 5.1.2.3 5.3.3.8]																									BHB10-2_Bin_362_scaffold_136778_4
		fadJ	K01782	3-hydroxyacyl-CoA dehydrogenase / enoyl-CoA hydratase / 3-hydroxybutyryl-CoA epimerase [EC:1.1.1.35 4.2.1.17 5.1.2.3]				Ga0186947_scaffold_1001_89				Meg19_1012_Bin_459_scaffold_5327_15		M8-62_Bin_262_scaffold_103744_4		GCA_005223185_scaffold_7_404		Meg19_1012_Bin_119_scaffold_7505_13													M3-22_Bin_282_scaffold_113671_3	M3-44_Bin_119_scaffold_3275_23				Meg22_1012_Bin_348_scaffold_26056_5	Meg22_1214_Bin_176_scaffold_5395_30
		ECHS1	K07511	enoyl-CoA hydratase [EC:4.2.1.17]
		fadB	K13767	enoyl-CoA hydratase [EC:4.2.1.17]
		EHHADH	K07514	enoyl-CoA hydratase / 3-hydroxyacyl-CoA dehydrogenase / 3,2-trans-enoyl-CoA isomerase [EC:4.2.1.17 1.1.1.35 5.3.3.8]
		HADHA	K07515	enoyl-CoA hydratase / long-chain 3-hydroxyacyl-CoA dehydrogenase [EC:4.2.1.17 1.1.1.211]																																		Meg22_1214_Bin_137_scaffold_156989_3
	3-hydroxyacyl-CoA dehydrogenase	HADH	K00022	3-hydroxyacyl-CoA dehydrogenase [EC:1.1.1.35]
		fadN	K07516	3-hydroxyacyl-CoA dehydrogenase [EC:1.1.1.35]																								AB_03_Bin_160_scaffold_22105_1						LQ108M_Bin_12_scaffold_288_93	Meg22_46_Bin_210_scaffold_279316_3
		MFP2	K10527	enoyl-CoA hydratase/3-hydroxyacyl-CoA dehydrogenase [EC:4.2.1.17 1.1.1.35 1.1.1.211]
		EHHADH	K07514	enoyl-CoA hydratase / 3-hydroxyacyl-CoA dehydrogenase / 3,2-trans-enoyl-CoA isomerase [EC:4.2.1.17 1.1.1.35 5.3.3.8]
		fadB	K01825	3-hydroxyacyl-CoA dehydrogenase / enoyl-CoA hydratase / 3-hydroxybutyryl-CoA epimerase / enoyl-CoA isomerase [EC:1.1.1.35 4.2.1.17 5.1.2.3 5.3.3.8]																									BHB10-2_Bin_362_scaffold_136778_4
		fadJ	K01782	3-hydroxyacyl-CoA dehydrogenase / enoyl-CoA hydratase / 3-hydroxybutyryl-CoA epimerase [EC:1.1.1.35 4.2.1.17 5.1.2.3]				Ga0186947_scaffold_1001_89				Meg19_1012_Bin_459_scaffold_5327_15		M8-62_Bin_262_scaffold_103744_4		GCA_005223185_scaffold_7_404		Meg19_1012_Bin_119_scaffold_7505_13													M3-22_Bin_282_scaffold_113671_3	M3-44_Bin_119_scaffold_3275_23				Meg22_1012_Bin_348_scaffold_26056_5	Meg22_1214_Bin_176_scaffold_5395_30
		HADHA	K07515	enoyl-CoA hydratase / long-chain 3-hydroxyacyl-CoA dehydrogenase [EC:4.2.1.17 1.1.1.211]																																		Meg22_1214_Bin_137_scaffold_156989_3
		MFP2	K10527	enoyl-CoA hydratase/3-hydroxyacyl-CoA dehydrogenase [EC:4.2.1.17 1.1.1.35 1.1.1.211]
	acetyl-CoA acyltransferase	fadA, fadI	K00632	acetyl-CoA acyltransferase [EC:2.3.1.16]	Meg22_810_Bin_217_scaffold_24316_5																				M8-62_Bin_157_scaffold_468900_1			AB_03_Bin_160_scaffold_22105_2						LQ108M_Bin_12_scaffold_1586_14,LQ108M_Bin_12_scaffold_12_183,LQ108M_Bin_12_scaffold_288_94
		ACAA2	K07508	acetyl-CoA acyltransferase 2 [EC:2.3.1.16]
		HADHB	K07509	acetyl-CoA acyltransferase [EC:2.3.1.16]
		ACAA1	K07513	acetyl-CoA acyltransferase 1 [EC:2.3.1.16]
Amino Acid Degradation	L-aspartate => L-alanine + CO2	asdA	K09758	aspartate 4-decarboxylase [EC:4.1.1.12]
	L-alanine + H2O + NAD+ => pyruvate + NH3 + NADH + H+	ald	K00259	alanine dehydrogenase [EC:1.4.1.1]	Meg22_810_Bin_217_scaffold_31031_4	Meg19_1012_Bin_198_scaffold_8275_13	GCA_002127415_scaffold_96_2			Meg22_1416_Bin_86_scaffold_53516_2		Meg19_1012_Bin_459_scaffold_3390_31		M8-62_Bin_262_scaffold_241289_1		GCA_005223185_scaffold_12_241			Meg19_46_Bin_239_scaffold_49980_3	Meg22_02_Bin_84_scaffold_37454_5	Meg19_46_Bin_60_scaffold_103733_3	Meg22_24_Bin_124_scaffold_33943_3	Meg22_46_Bin_213_scaffold_273270_2,Meg22_46_Bin_213_scaffold_44903_3		M8-62_Bin_157_scaffold_7281_10	M8-62_Bin_326_scaffold_40695_4,M8-62_Bin_326_scaffold_79543_5	SY70-4-11_Bin_40_scaffold_2844_3			M3-10_Bin_262_scaffold_223344_1		M3-44_Bin_119_scaffold_6058_2	GCA_003820615_scaffold_742_1		Meg22_46_Bin_210_scaffold_82207_2
		ala	K19244	alanine dehydrogenase [EC:1.4.1.1]													Meg22_46_Bin_11_scaffold_112219_3	Meg19_1012_Bin_119_scaffold_113399_4,Meg19_1012_Bin_119_scaffold_50748_4	Meg19_46_Bin_239_scaffold_35656_2,Meg19_46_Bin_239_scaffold_49237_2	Meg22_02_Bin_84_scaffold_110667_3,Meg22_02_Bin_84_scaffold_125819_3	Meg19_46_Bin_60_scaffold_261164_3,Meg19_46_Bin_60_scaffold_48704_2	Meg22_24_Bin_124_scaffold_11785_7	Meg22_46_Bin_213_scaffold_15986_7	M3-38_Bin_215_scaffold_86829_3		M8-62_Bin_326_scaffold_916622_1	SY70-4-11_Bin_40_scaffold_33264_2					M3-44_Bin_119_scaffold_822_30				Meg22_1012_Bin_348_scaffold_9364_12	Meg22_1214_Bin_176_scaffold_74496_2		Meg22_46_Bin_89_scaffold_8767_3	Meg22_24_Bin_129_scaffold_4067_6	BHB10-38_Bin_186_scaffold_102364_1
	L-alanine + glyoxylate <=> pyruvate + glycine	AGXT2	K00827	alanine-glyoxylate transaminase / (R)-3-amino-2-methylpropionate-pyruvate transaminase [EC:2.6.1.44 2.6.1.40]									M3-44_Bin_198_scaffold_125699_3			GCA_005223185_scaffold_6_70												AB_03_Bin_160_scaffold_3106_6	BHB10-2_Bin_362_scaffold_44501_9		M3-22_Bin_282_scaffold_28704_5			LQ108M_Bin_12_scaffold_75_3	Meg22_46_Bin_210_scaffold_62979_1
		AGXT	K00830	alanine-glyoxylate transaminase / serine-glyoxylate transaminase / serine-pyruvate transaminase [EC:2.6.1.44 2.6.1.45 2.6.1.51]								Meg19_1012_Bin_459_scaffold_150_27				GCA_005223185_scaffold_16_257	Meg22_46_Bin_11_scaffold_23868_9	Meg19_1012_Bin_119_scaffold_12333_12	Meg19_46_Bin_239_scaffold_35539_2		Meg19_46_Bin_60_scaffold_28755_2	Meg22_24_Bin_124_scaffold_77584_2	Meg22_46_Bin_213_scaffold_8692_18		M8-62_Bin_157_scaffold_36674_3		SY70-4-11_Bin_40_scaffold_35700_2									Meg22_1012_Bin_348_scaffold_60981_3		Meg22_1214_Bin_137_scaffold_61973_3				BHB10-38_Bin_9_scaffold_166927_3
		GGAT	K14272	glutamate--glyoxylate aminotransferase [EC:2.6.1.4 2.6.1.2 2.6.1.44]
	L-alanine + 2-oxoglutarate <=> pyruvate + L-glutamate	GPT, ALT	K00814	alanine transaminase [EC:2.6.1.2]											GCA_003599535_scaffold_33_13			Meg19_1012_Bin_119_scaffold_20287_8	Meg19_46_Bin_239_scaffold_229765_2		Meg19_46_Bin_60_scaffold_322008_1						SY70-4-11_Bin_40_scaffold_3598_5														BHB10-38_Bin_186_scaffold_655618_2
		alaA	K14260	alanine-synthesizing transaminase [EC:2.6.1.66 2.6.1.2]																					M8-62_Bin_157_scaffold_20424_1	M8-62_Bin_326_scaffold_238653_1							GCA_003820615_scaffold_123_1																Meg22_46_Bin_45_scaffold_308742_1
		GGAT	K14272	glutamate--glyoxylate aminotransferase [EC:2.6.1.4 2.6.1.2 2.6.1.44]
	L-aspartate => fumarate + NH3	aspA	K01744	aspartate ammonia-lyase [EC:4.3.1.1]								Meg19_1012_Bin_459_scaffold_531_4				GCA_005223185_scaffold_7_73	Meg22_46_Bin_11_scaffold_47529_1	Meg19_1012_Bin_119_scaffold_23095_10	Meg19_46_Bin_239_scaffold_8443_8	Meg22_02_Bin_84_scaffold_64292_3			Meg22_46_Bin_213_scaffold_665659_1										GCA_003820615_scaffold_306_3				Meg22_1214_Bin_176_scaffold_8385_15		Meg22_46_Bin_89_scaffold_63347_3	Meg22_24_Bin_129_scaffold_63099_3	BHB10-38_Bin_186_scaffold_187407_3	BHB10-38_Bin_9_scaffold_32558_7	M3-30_Bin_374_scaffold_2903_2
	L-aspartate => Adenylo-succinate => Fumarate	purA, ADSS	K01939	adenylosuccinate synthase [EC:6.3.4.4]	Meg22_810_Bin_217_scaffold_53500_4	Meg19_1012_Bin_198_scaffold_46575_2	GCA_002127415_scaffold_255_4	Ga0186947_scaffold_1009_19	Ga0170695_scaffold_1020_8	Meg22_1416_Bin_86_scaffold_36387_5		Meg19_1012_Bin_459_scaffold_1055_34		M8-62_Bin_262_scaffold_454449_2	GCA_003599535_scaffold_1_101	GCA_005223185_scaffold_13_62							Meg22_46_Bin_213_scaffold_161527_3				SY70-4-11_Bin_40_scaffold_22976_1		BHB10-2_Bin_362_scaffold_65935_4		M3-22_Bin_282_scaffold_156899_1,M3-22_Bin_282_scaffold_159513_1	M3-44_Bin_119_scaffold_22562_1	GCA_003820615_scaffold_323_4	LQ108M_Bin_12_scaffold_2_55	Meg22_46_Bin_210_scaffold_16723_3	Meg22_1012_Bin_348_scaffold_32350_2	Meg22_1214_Bin_176_scaffold_1271_41	Meg22_1214_Bin_137_scaffold_61973_2	Meg22_46_Bin_89_scaffold_1420_25	Meg22_24_Bin_129_scaffold_1680_19	BHB10-38_Bin_186_scaffold_257981_3,BHB10-38_Bin_186_scaffold_59697_6	BHB10-38_Bin_9_scaffold_166927_2	M3-30_Bin_374_scaffold_17014_6		SY70-4-3_Bin_59_scaffold_74511_3	Meg19_02_Bin_5_scaffold_29092_1			Meg22_46_Bin_45_scaffold_30453_1
		purB, ADSL	K01756	adenylosuccinate lyase [EC:4.3.2.2]	Meg22_810_Bin_217_scaffold_53739_7	Meg19_1012_Bin_198_scaffold_6754_3		Ga0186947_scaffold_1012_16		Meg22_1416_Bin_86_scaffold_42020_2	Meg22_46_Bin_23_scaffold_16659_4	Meg19_1012_Bin_459_scaffold_1055_12	M3-44_Bin_198_scaffold_159851_2	M8-62_Bin_262_scaffold_7935_19		GCA_005223185_scaffold_1_37	Meg22_46_Bin_11_scaffold_222731_2	Meg19_1012_Bin_119_scaffold_12333_4	Meg19_46_Bin_239_scaffold_89755_4		Meg19_46_Bin_60_scaffold_180516_2	Meg22_24_Bin_124_scaffold_103152_1		M3-38_Bin_215_scaffold_331110_3	M8-62_Bin_157_scaffold_115916_7	M8-62_Bin_326_scaffold_299848_2	SY70-4-11_Bin_40_scaffold_21904_5	AB_03_Bin_160_scaffold_67655_3	BHB10-2_Bin_362_scaffold_77646_1		M3-22_Bin_282_scaffold_17031_13	M3-44_Bin_119_scaffold_3774_26		LQ108M_Bin_12_scaffold_29_8	Meg22_46_Bin_210_scaffold_504472_2	Meg22_1012_Bin_348_scaffold_85985_2	Meg22_1214_Bin_176_scaffold_3287_18		Meg22_46_Bin_89_scaffold_1217_12	Meg22_24_Bin_129_scaffold_1591_9	BHB10-38_Bin_186_scaffold_77068_1	BHB10-38_Bin_9_scaffold_6612_15	M3-30_Bin_374_scaffold_1606_12			Meg19_02_Bin_5_scaffold_78650_2	ex4484_8_scaffold_3429_11,ex4484_8_scaffold_4044_10		Meg22_46_Bin_45_scaffold_30453_6
	L-aspartate => L-Arginino-succinate => Fumarate	argG, ASS1	K01940	argininosuccinate synthase [EC:6.3.4.5]																										M3-10_Bin_262_scaffold_178600_3	M3-22_Bin_282_scaffold_5706_4										BHB10-38_Bin_186_scaffold_300367_2
		argH, ASL	K01755	argininosuccinate lyase [EC:4.3.2.1]																										M3-10_Bin_262_scaffold_178600_4	M3-22_Bin_282_scaffold_5706_3
	L-Aspartate + 2-Oxoglutarate <=> Oxaloacetate + L-Glutamate	GOT1	K14454	aspartate aminotransferase, cytoplasmic [EC:2.6.1.1]
		GOT2	K14455	aspartate aminotransferase, mitochondrial [EC:2.6.1.1]
		ASPS	K00811	aspartate aminotransferase, chloroplastic [EC:2.6.1.1]
		aspB	K00812	aspartate aminotransferase [EC:2.6.1.1]		Meg19_1012_Bin_198_scaffold_16588_5	GCA_002127415_scaffold_18_6		Ga0170695_scaffold_1043_1	Meg22_1416_Bin_86_scaffold_50890_4	Meg22_46_Bin_23_scaffold_73503_4,Meg22_46_Bin_23_scaffold_59435_2	Meg19_1012_Bin_459_scaffold_284_80,Meg19_1012_Bin_459_scaffold_187_39,Meg19_1012_Bin_459_scaffold_284_78		M8-62_Bin_262_scaffold_162699_1	GCA_003599535_scaffold_43_5	GCA_005223185_scaffold_9_55,GCA_005223185_scaffold_1_178,GCA_005223185_scaffold_9_53	Meg22_46_Bin_11_scaffold_47142_3	Meg19_1012_Bin_119_scaffold_113399_5,Meg19_1012_Bin_119_scaffold_10543_12	Meg19_46_Bin_239_scaffold_35656_3	Meg22_02_Bin_84_scaffold_17966_8		Meg22_24_Bin_124_scaffold_7728_8	Meg22_46_Bin_213_scaffold_14209_8	M3-38_Bin_215_scaffold_133224_4	M8-62_Bin_157_scaffold_17367_9	M8-62_Bin_326_scaffold_44057_7	SY70-4-11_Bin_40_scaffold_5896_8		BHB10-2_Bin_362_scaffold_12609_12,BHB10-2_Bin_362_scaffold_30408_7	M3-10_Bin_262_scaffold_48040_6	M3-22_Bin_282_scaffold_7891_7	M3-44_Bin_119_scaffold_1092_3,M3-44_Bin_119_scaffold_7260_3		LQ108M_Bin_12_scaffold_12_461,LQ108M_Bin_12_scaffold_75_115	Meg22_46_Bin_210_scaffold_22507_2,Meg22_46_Bin_210_scaffold_174048_2	Meg22_1012_Bin_348_scaffold_101201_3,Meg22_1012_Bin_348_scaffold_36844_2	Meg22_1214_Bin_176_scaffold_15159_9,Meg22_1214_Bin_176_scaffold_4537_12,Meg22_1214_Bin_176_scaffold_63743_3	Meg22_1214_Bin_137_scaffold_59065_6	Meg22_46_Bin_89_scaffold_2524_12,Meg22_46_Bin_89_scaffold_4972_8	Meg22_24_Bin_129_scaffold_1414_4,Meg22_24_Bin_129_scaffold_16915_3	BHB10-38_Bin_186_scaffold_28004_9,BHB10-38_Bin_186_scaffold_97245_6	BHB10-38_Bin_9_scaffold_15739_12,BHB10-38_Bin_9_scaffold_251657_3	M3-30_Bin_374_scaffold_7041_11,M3-30_Bin_374_scaffold_8642_1	SY70-4-3_Bin_44_scaffold_30500_4	SY70-4-3_Bin_59_scaffold_17956_3		ex4484_8_scaffold_565_14
		aspC	K00813	aspartate aminotransferase [EC:2.6.1.1]
		yhdR	K11358	aspartate aminotransferase [EC:2.6.1.1]																									BHB10-2_Bin_362_scaffold_140854_3					LQ108M_Bin_12_scaffold_2945_28
	L-Aspartate + H2O + Oxygen <=> Oxaloacetate + NH3 + H2O2	IL4I1	K03334	L-amino-acid oxidase [EC:1.4.3.2]
		nadB	K00278	L-aspartate oxidase [EC:1.4.3.16]		Meg19_1012_Bin_198_scaffold_2811_3	GCA_002127415_scaffold_135_2	Ga0186947_scaffold_1082_1	Ga0170695_scaffold_1001_19	Meg22_1416_Bin_86_scaffold_86776_3	Meg22_46_Bin_23_scaffold_42702_3,Meg22_46_Bin_23_scaffold_152750_1	Meg19_1012_Bin_459_scaffold_4481_18,Meg19_1012_Bin_459_scaffold_434_20	M3-44_Bin_198_scaffold_73375_2	M8-62_Bin_262_scaffold_173217_2,M8-62_Bin_262_scaffold_6800_7	GCA_003599535_scaffold_45_6	GCA_005223185_scaffold_16_33,GCA_005223185_scaffold_14_50		Meg19_1012_Bin_119_scaffold_3417_10	Meg19_46_Bin_239_scaffold_97217_3			Meg22_24_Bin_124_scaffold_58184_1	Meg22_46_Bin_213_scaffold_166927_1					AB_03_Bin_160_scaffold_22090_3	BHB10-2_Bin_362_scaffold_247874_2		M3-22_Bin_282_scaffold_26996_2	M3-44_Bin_119_scaffold_61705_8	GCA_003820615_scaffold_536_2	LQ108M_Bin_12_scaffold_2_253	Meg22_46_Bin_210_scaffold_549640_2		Meg22_1214_Bin_176_scaffold_17095_12	Meg22_1214_Bin_137_scaffold_59697_3	Meg22_46_Bin_89_scaffold_3654_11	Meg22_24_Bin_129_scaffold_1693_9		BHB10-38_Bin_9_scaffold_317604_2,BHB10-38_Bin_9_scaffold_377449_3	M3-30_Bin_374_scaffold_1047_42	SY70-4-3_Bin_44_scaffold_242438_1		Meg19_02_Bin_5_scaffold_32166_2	ex4484_8_scaffold_2196_16	Meg19_46_Bin_228_scaffold_22463_2,Meg19_46_Bin_228_scaffold_37053_2	Meg22_46_Bin_45_scaffold_154035_3
	L-Aspartate => D-Asparate, + H2O + Oxygen => Oxaloacetate + NH3 + H2O2	racD	K01779	aspartate racemase [EC:5.1.1.13]	Meg22_810_Bin_217_scaffold_169029_2	Meg19_1012_Bin_198_scaffold_1620_29	GCA_002127415_scaffold_21_3				Meg22_46_Bin_23_scaffold_52146_1	Meg19_1012_Bin_459_scaffold_563_79					Meg22_46_Bin_11_scaffold_302581_1	Meg19_1012_Bin_119_scaffold_15639_7	Meg19_46_Bin_239_scaffold_121403_3,Meg19_46_Bin_239_scaffold_194218_3	Meg22_02_Bin_84_scaffold_115629_2,Meg22_02_Bin_84_scaffold_19505_4	Meg19_46_Bin_60_scaffold_164387_4,Meg19_46_Bin_60_scaffold_64206_2	Meg22_24_Bin_124_scaffold_74737_1	Meg22_46_Bin_213_scaffold_43923_2		M8-62_Bin_157_scaffold_84150_4	M8-62_Bin_326_scaffold_44694_1	SY70-4-11_Bin_40_scaffold_3598_4,SY70-4-11_Bin_40_scaffold_56118_5			M3-10_Bin_262_scaffold_148704_2								Meg22_1214_Bin_137_scaffold_222126_3			BHB10-38_Bin_186_scaffold_39572_8
		DDO	K00272	D-aspartate oxidase [EC:1.4.3.1]
	L-Aspartate + Ammonia <=> L-Asparagine	asnA	K01914	aspartate--ammonia ligase [EC:6.3.1.1]		Meg19_1012_Bin_198_scaffold_110747_1	GCA_002127415_scaffold_310_4									GCA_005223185_scaffold_9_52												AB_03_Bin_160_scaffold_162228_2	BHB10-2_Bin_362_scaffold_28561_4	M3-10_Bin_262_scaffold_108696_3	M3-22_Bin_282_scaffold_47918_4	M3-44_Bin_119_scaffold_2869_27	GCA_003820615_scaffold_770_4	LQ108M_Bin_12_scaffold_450_56		Meg22_1012_Bin_348_scaffold_56349_4	Meg22_1214_Bin_176_scaffold_6901_20	Meg22_1214_Bin_137_scaffold_48483_2	Meg22_46_Bin_89_scaffold_4079_13	Meg22_24_Bin_129_scaffold_60321_4	BHB10-38_Bin_186_scaffold_391532_3	BHB10-38_Bin_9_scaffold_91928_3	M3-30_Bin_374_scaffold_310670_3		SY70-4-3_Bin_59_scaffold_40124_1	Meg19_02_Bin_5_scaffold_214567_1,Meg19_02_Bin_5_scaffold_79036_1	ex4484_8_scaffold_4979_8	Meg19_46_Bin_228_scaffold_54282_4	Meg22_46_Bin_45_scaffold_81060_2
	L-Aspartate + L-Glutamine + H2O <=> Diphosphate + L-Asparagine + L-Glutamate	asnB, ASNS	K01953	asparagine synthase (glutamine-hydrolysing) [EC:6.3.5.4]	Meg22_810_Bin_217_scaffold_156240_3	Meg19_1012_Bin_198_scaffold_4172_15	GCA_002127415_scaffold_230_3,GCA_002127415_scaffold_285_1	Ga0186947_scaffold_1039_9	Ga0170695_scaffold_1009_7	Meg22_1416_Bin_86_scaffold_6081_3,Meg22_1416_Bin_86_scaffold_6081_6			M3-44_Bin_198_scaffold_134565_1,M3-44_Bin_198_scaffold_134565_2,M3-44_Bin_198_scaffold_65471_5		GCA_003599535_scaffold_117_5,GCA_003599535_scaffold_117_6	GCA_005223185_scaffold_18_39	Meg22_46_Bin_11_scaffold_9066_1	Meg19_1012_Bin_119_scaffold_11914_1	Meg19_46_Bin_239_scaffold_100001_3	Meg22_02_Bin_84_scaffold_97242_1		Meg22_24_Bin_124_scaffold_23915_7	Meg22_46_Bin_213_scaffold_13689_11				SY70-4-11_Bin_40_scaffold_2964_1,SY70-4-11_Bin_40_scaffold_3835_3	AB_03_Bin_160_scaffold_38045_4	BHB10-2_Bin_362_scaffold_108921_7,BHB10-2_Bin_362_scaffold_191281_3,BHB10-2_Bin_362_scaffold_49976_5,BHB10-2_Bin_362_scaffold_68574_9	M3-10_Bin_262_scaffold_117152_2,M3-10_Bin_262_scaffold_153156_3,M3-10_Bin_262_scaffold_79257_1	M3-22_Bin_282_scaffold_23507_5,M3-22_Bin_282_scaffold_37310_2,M3-22_Bin_282_scaffold_8036_3	M3-44_Bin_119_scaffold_468995_4,M3-44_Bin_119_scaffold_701_24,M3-44_Bin_119_scaffold_701_29	GCA_003820615_scaffold_401_1,GCA_003820615_scaffold_673_1	LQ108M_Bin_12_scaffold_22595_7,LQ108M_Bin_12_scaffold_311_101,LQ108M_Bin_12_scaffold_876_31							BHB10-38_Bin_186_scaffold_349543_2,BHB10-38_Bin_186_scaffold_79927_3
	L-Asparagine + H2O <=> L-Aspartate + Ammonia	aspQ, ansB, ansA	K05597	glutamin-(asparagin-)ase [EC:3.5.1.38]
		E3.5.1.1, ansA, ansB	K01424	L-asparaginase [EC:3.5.1.1]	Meg22_810_Bin_217_scaffold_31968_3,Meg22_810_Bin_217_scaffold_31968_6		GCA_002127415_scaffold_310_5	Ga0186947_scaffold_1002_17	Ga0170695_scaffold_1069_5			Meg19_1012_Bin_459_scaffold_10231_17		M8-62_Bin_262_scaffold_36974_3	GCA_003599535_scaffold_7_8	GCA_005223185_scaffold_9_51		Meg19_1012_Bin_119_scaffold_41770_4,Meg19_1012_Bin_119_scaffold_70087_5	Meg19_46_Bin_239_scaffold_184683_2,Meg19_46_Bin_239_scaffold_87811_3	Meg22_02_Bin_84_scaffold_1204503_3,Meg22_02_Bin_84_scaffold_1204503_4,Meg22_02_Bin_84_scaffold_288685_1,Meg22_02_Bin_84_scaffold_53162_1		Meg22_24_Bin_124_scaffold_59754_1	Meg22_46_Bin_213_scaffold_341327_1,Meg22_46_Bin_213_scaffold_72839_5,Meg22_46_Bin_213_scaffold_75499_1	M3-38_Bin_215_scaffold_102131_3,M3-38_Bin_215_scaffold_228060_2	M8-62_Bin_157_scaffold_11049_4,M8-62_Bin_157_scaffold_148415_3	M8-62_Bin_326_scaffold_290938_3			BHB10-2_Bin_362_scaffold_102252_7		M3-22_Bin_282_scaffold_75341_8	M3-44_Bin_119_scaffold_3432_10	GCA_003820615_scaffold_344_3		Meg22_46_Bin_210_scaffold_17406_4,Meg22_46_Bin_210_scaffold_191709_3									SY70-4-3_Bin_44_scaffold_11351_4,SY70-4-3_Bin_44_scaffold_11351_5		Meg19_02_Bin_5_scaffold_184628_2			Meg22_46_Bin_45_scaffold_92617_2
		ASRGL1, iaaA	K13051	L-asparaginase / beta-aspartyl-peptidase [EC:3.5.1.1 3.4.19.5]																																					BHB10-38_Bin_186_scaffold_270020_3						ex4484_8_scaffold_13320_8,ex4484_8_scaffold_201_17	Meg19_46_Bin_228_scaffold_34802_2	Meg22_46_Bin_45_scaffold_35737_4
	L-Asparagine => 2-Oxosuccinamate => Oxaloacetate	E2.6.1.14	K22457	asparagine---oxo-acid transaminase [EC:2.6.1.14]
		NIT2, yafV	K13566	omega-amidase [EC:3.5.1.3]											GCA_003599535_scaffold_108_9
	L-Glutamate => L-Glutamine	glnA, GLUL	K01915	glutamine synthetase [EC:6.3.1.2]	Meg22_810_Bin_217_scaffold_31968_2	Meg19_1012_Bin_198_scaffold_13450_2,Meg19_1012_Bin_198_scaffold_8679_1	GCA_002127415_scaffold_337_3	Ga0186947_scaffold_1001_94,Ga0186947_scaffold_1074_4		Meg22_1416_Bin_86_scaffold_81958_1	Meg22_46_Bin_23_scaffold_275537_1,Meg22_46_Bin_23_scaffold_41501_6	Meg19_1012_Bin_459_scaffold_16040_9,Meg19_1012_Bin_459_scaffold_531_20	M3-44_Bin_198_scaffold_239138_2,M3-44_Bin_198_scaffold_260086_1	M8-62_Bin_262_scaffold_20859_4,M8-62_Bin_262_scaffold_34474_5	GCA_003599535_scaffold_107_2,GCA_003599535_scaffold_32_31	GCA_005223185_scaffold_12_127,GCA_005223185_scaffold_7_219	Meg22_46_Bin_11_scaffold_62414_3,Meg22_46_Bin_11_scaffold_77658_3	Meg19_1012_Bin_119_scaffold_3088_12,Meg19_1012_Bin_119_scaffold_39796_6		Meg22_02_Bin_84_scaffold_137550_3	Meg19_46_Bin_60_scaffold_43271_4,Meg19_46_Bin_60_scaffold_50348_5	Meg22_24_Bin_124_scaffold_10625_5,Meg22_24_Bin_124_scaffold_13325_14	Meg22_46_Bin_213_scaffold_18599_17,Meg22_46_Bin_213_scaffold_66566_2	M3-38_Bin_215_scaffold_102131_2,M3-38_Bin_215_scaffold_299348_2	M8-62_Bin_157_scaffold_20642_15,M8-62_Bin_157_scaffold_213511_1,M8-62_Bin_157_scaffold_5367_18	M8-62_Bin_326_scaffold_87112_1	SY70-4-11_Bin_40_scaffold_27612_9	AB_03_Bin_160_scaffold_10919_3	BHB10-2_Bin_362_scaffold_78070_2	M3-10_Bin_262_scaffold_16941_11,M3-10_Bin_262_scaffold_36121_3	M3-22_Bin_282_scaffold_12375_6,M3-22_Bin_282_scaffold_7533_17	M3-44_Bin_119_scaffold_20111_4	GCA_003820615_scaffold_193_1,GCA_003820615_scaffold_683_1	LQ108M_Bin_12_scaffold_288_46,LQ108M_Bin_12_scaffold_2_375	Meg22_46_Bin_210_scaffold_17406_3,Meg22_46_Bin_210_scaffold_70178_2	Meg22_1012_Bin_348_scaffold_52101_8,Meg22_1012_Bin_348_scaffold_94877_4	Meg22_1214_Bin_176_scaffold_13693_19,Meg22_1214_Bin_176_scaffold_49685_3	Meg22_1214_Bin_137_scaffold_17817_2,Meg22_1214_Bin_137_scaffold_43882_1	Meg22_46_Bin_89_scaffold_56128_3	Meg22_24_Bin_129_scaffold_199215_1,Meg22_24_Bin_129_scaffold_3650_5	BHB10-38_Bin_186_scaffold_110982_3,BHB10-38_Bin_186_scaffold_265425_3,BHB10-38_Bin_186_scaffold_30242_3	BHB10-38_Bin_9_scaffold_128037_4	M3-30_Bin_374_scaffold_395_11,M3-30_Bin_374_scaffold_8642_6	SY70-4-3_Bin_44_scaffold_62346_2,SY70-4-3_Bin_44_scaffold_68966_2	SY70-4-3_Bin_59_scaffold_14685_4,SY70-4-3_Bin_59_scaffold_25475_2	Meg19_02_Bin_5_scaffold_120514_2,Meg19_02_Bin_5_scaffold_152757_1			Meg22_46_Bin_45_scaffold_113306_1,Meg22_46_Bin_45_scaffold_51231_4
	L-Glutamine + 2-Oxoglutarate => L-Glutamate	GLT1	K00264	glutamate synthase (NADH) [EC:1.4.1.14]
		gltB	K00265	glutamate synthase (NADPH) large chain [EC:1.4.1.13]
		gltD	K00266	glutamate synthase (NADPH) small chain [EC:1.4.1.13]	Meg22_810_Bin_217_scaffold_32700_4	Meg19_1012_Bin_198_scaffold_61220_6	GCA_002127415_scaffold_9_7,GCA_002127415_scaffold_277_3	Ga0186947_scaffold_1016_20		Meg22_1416_Bin_86_scaffold_98488_3		Meg19_1012_Bin_459_scaffold_5327_12	M3-44_Bin_198_scaffold_181373_1	M8-62_Bin_262_scaffold_84639_5,M8-62_Bin_262_scaffold_301549_2	GCA_003599535_scaffold_10_14	GCA_005223185_scaffold_7_401		Meg19_1012_Bin_119_scaffold_19495_12	Meg19_46_Bin_239_scaffold_128252_2				Meg22_46_Bin_213_scaffold_187604_3,Meg22_46_Bin_213_scaffold_28495_30				SY70-4-11_Bin_40_scaffold_79223_2	AB_03_Bin_160_scaffold_22996_4		M3-10_Bin_262_scaffold_62730_3	M3-22_Bin_282_scaffold_27356_6	M3-44_Bin_119_scaffold_3079_25	GCA_003820615_scaffold_114_1		Meg22_46_Bin_210_scaffold_63891_5	Meg22_1012_Bin_348_scaffold_26056_8	Meg22_1214_Bin_176_scaffold_5395_26	Meg22_1214_Bin_137_scaffold_21999_10,Meg22_1214_Bin_137_scaffold_67251_1	Meg22_46_Bin_89_scaffold_18666_15	Meg22_24_Bin_129_scaffold_1760_7,Meg22_24_Bin_129_scaffold_2248_6					SY70-4-3_Bin_59_scaffold_89758_1,SY70-4-3_Bin_59_scaffold_5520_8		ex4484_8_scaffold_1306_17
		GLU, gltS	K00284	glutamate synthase (ferredoxin) [EC:1.4.7.1]
	L-Glutamine => L-Glutamate + NH3	glsA, GLS	K01425	glutaminase [EC:3.5.1.2]																																Meg22_1012_Bin_348_scaffold_63405_4	Meg22_1214_Bin_176_scaffold_210773_2
		purQ	K23265	phosphoribosylformylglycinamidine synthase subunit PurQ / glutaminase [EC:6.3.5.3 3.5.1.2]	Meg22_810_Bin_217_scaffold_36986_1,Meg22_810_Bin_217_scaffold_54862_10	Meg19_1012_Bin_198_scaffold_6754_10	GCA_002127415_scaffold_321_6	Ga0186947_scaffold_1012_21		Meg22_1416_Bin_86_scaffold_42020_7	Meg22_46_Bin_23_scaffold_112902_1	Meg19_1012_Bin_459_scaffold_1055_17		M8-62_Bin_262_scaffold_7935_14	GCA_003599535_scaffold_89_4	GCA_005223185_scaffold_1_32	Meg22_46_Bin_11_scaffold_131814_6	Meg19_1012_Bin_119_scaffold_67762_2	Meg19_46_Bin_239_scaffold_11694_5	Meg22_02_Bin_84_scaffold_66040_2	Meg19_46_Bin_60_scaffold_6236_10	Meg22_24_Bin_124_scaffold_22339_4	Meg22_46_Bin_213_scaffold_186907_3		M8-62_Bin_157_scaffold_294258_2		SY70-4-11_Bin_40_scaffold_9386_4		BHB10-2_Bin_362_scaffold_457524_3	M3-10_Bin_262_scaffold_186169_2	M3-22_Bin_282_scaffold_17031_11	M3-44_Bin_119_scaffold_3774_28	GCA_003820615_scaffold_795_3	LQ108M_Bin_12_scaffold_29_10	Meg22_46_Bin_210_scaffold_147808_2		Meg22_1214_Bin_176_scaffold_3287_16	Meg22_1214_Bin_137_scaffold_133543_2	Meg22_46_Bin_89_scaffold_1217_10	Meg22_24_Bin_129_scaffold_1591_11		BHB10-38_Bin_9_scaffold_6612_13	M3-30_Bin_374_scaffold_1606_10		SY70-4-3_Bin_59_scaffold_75566_3	Meg19_02_Bin_5_scaffold_150968_2		Meg19_46_Bin_228_scaffold_168886_1	Meg22_46_Bin_45_scaffold_66941_7,Meg22_46_Bin_45_scaffold_999_12
		aspQ, ansB, ansA	K05597	glutamin-(asparagin-)ase [EC:3.5.1.38]
	L-Glutamate => 2-Oxoglutarate + NH3	GLUD1_2	K00261	glutamate dehydrogenase (NAD(O)+) [EC:1.4.1.3]					Ga0170695_scaffold_1033_4	Meg22_1416_Bin_86_scaffold_59003_9			M3-44_Bin_198_scaffold_22705_10		GCA_003599535_scaffold_15_3,GCA_003599535_scaffold_58_13	GCA_005223185_scaffold_15_48												AB_03_Bin_160_scaffold_45908_3	BHB10-2_Bin_362_scaffold_203290_2	M3-10_Bin_262_scaffold_75048_1	M3-22_Bin_282_scaffold_14569_4		GCA_003820615_scaffold_315_10,GCA_003820615_scaffold_690_1,GCA_003820615_scaffold_649_2	LQ108M_Bin_12_scaffold_359_26,LQ108M_Bin_12_scaffold_17_111		Meg22_1012_Bin_348_scaffold_159447_1	Meg22_1214_Bin_176_scaffold_77407_2			Meg22_24_Bin_129_scaffold_15313_5								Meg19_46_Bin_228_scaffold_36499_3
		gdhA	K00262	glutamate dehydrogenase (NADP+) [EC:1.4.1.4]		Meg19_1012_Bin_198_scaffold_7941_6	GCA_002127415_scaffold_130_3			Meg22_1416_Bin_86_scaffold_130302_2		Meg19_1012_Bin_459_scaffold_1951_22		M8-62_Bin_262_scaffold_30979_3,M8-62_Bin_262_scaffold_5560_17	GCA_003599535_scaffold_15_4									M3-38_Bin_215_scaffold_136677_2	M8-62_Bin_157_scaffold_26944_4			AB_03_Bin_160_scaffold_10012_10	BHB10-2_Bin_362_scaffold_463632_1	M3-10_Bin_262_scaffold_69731_1	M3-22_Bin_282_scaffold_51652_7	M3-44_Bin_119_scaffold_1082_76		LQ108M_Bin_12_scaffold_288_102		Meg22_1012_Bin_348_scaffold_72139_3	Meg22_1214_Bin_176_scaffold_220634_1		Meg22_46_Bin_89_scaffold_52650_3	Meg22_24_Bin_129_scaffold_4010_11		BHB10-38_Bin_9_scaffold_128442_3	M3-30_Bin_374_scaffold_2903_18		SY70-4-3_Bin_59_scaffold_36087_2
		GDH2	K15371	glutamate dehydrogenase [EC:1.4.1.2]													Meg22_46_Bin_11_scaffold_82600_3	Meg19_1012_Bin_119_scaffold_6657_25		Meg22_02_Bin_84_scaffold_141760_1	Meg19_46_Bin_60_scaffold_184151_1	Meg22_24_Bin_124_scaffold_23810_3	Meg22_46_Bin_213_scaffold_56038_2				SY70-4-11_Bin_40_scaffold_16609_1														BHB10-38_Bin_186_scaffold_227775_1
		gudB, rocG	K00260	glutamate dehydrogenase [EC:1.4.1.2] NAD+	Meg22_810_Bin_217_scaffold_167170_2	Meg19_1012_Bin_198_scaffold_1771_22						Meg19_1012_Bin_459_scaffold_284_83																	BHB10-2_Bin_362_scaffold_239254_3,BHB10-2_Bin_362_scaffold_37146_17		M3-22_Bin_282_scaffold_139487_2											BHB10-38_Bin_9_scaffold_10554_7		SY70-4-3_Bin_44_scaffold_25583_3	SY70-4-3_Bin_59_scaffold_46783_2
	L-Aspartate => 4-Phospho-L-aspartate	lysC	K00928	aspartate kinase [EC:2.7.2.4]		Meg19_1012_Bin_198_scaffold_7812_5	GCA_002127415_scaffold_153_5,GCA_002127415_scaffold_144_9	Ga0186947_scaffold_1053_6	Ga0170695_scaffold_1011_5	Meg22_1416_Bin_86_scaffold_83060_3	Meg22_46_Bin_23_scaffold_59324_6	Meg19_1012_Bin_459_scaffold_263_6		M8-62_Bin_262_scaffold_37395_5	GCA_003599535_scaffold_71_3	GCA_005223185_scaffold_17_36									M8-62_Bin_157_scaffold_45009_13						M3-22_Bin_282_scaffold_19588_4							Meg22_1214_Bin_137_scaffold_52492_4	Meg22_46_Bin_89_scaffold_2971_8	Meg22_24_Bin_129_scaffold_953_27			M3-30_Bin_374_scaffold_214_53	SY70-4-3_Bin_44_scaffold_68635_1	SY70-4-3_Bin_59_scaffold_18090_4	Meg19_02_Bin_5_scaffold_57030_2,Meg19_02_Bin_5_scaffold_60918_2		Meg19_46_Bin_228_scaffold_12362_9	Meg22_46_Bin_45_scaffold_18151_2
		thrA	K12524	bifunctional aspartokinase / homoserine dehydrogenase 1 [EC:2.7.2.4 1.1.1.3]																									BHB10-2_Bin_362_scaffold_128343_1		M3-22_Bin_282_scaffold_19588_4				Meg22_46_Bin_210_scaffold_229940_2
		metL	K12525	bifunctional aspartokinase / homoserine dehydrogenase 2 [EC:2.7.2.4 1.1.1.3]
		lysAC	K12526	bifunctional diaminopimelate decarboxylase / aspartate kinase [EC:4.1.1.20 2.7.2.4]
	4-Phospho-L-aspartate => L-Aspartate 4-semialdehyde	asd	K00133	aspartate-semialdehyde dehydrogenase [EC:1.2.1.11]		Meg19_1012_Bin_198_scaffold_27694_7	GCA_002127415_scaffold_306_3	Ga0186947_scaffold_1086_5		Meg22_1416_Bin_86_scaffold_130302_5	Meg22_46_Bin_23_scaffold_172709_2	Meg19_1012_Bin_459_scaffold_1951_20	M3-44_Bin_198_scaffold_223329_1,M3-44_Bin_198_scaffold_436180_1	M8-62_Bin_262_scaffold_190254_2	GCA_003599535_scaffold_121_10	GCA_005223185_scaffold_3_42		Meg19_1012_Bin_119_scaffold_12773_11						M3-38_Bin_215_scaffold_139748_4,M3-38_Bin_215_scaffold_85703_8	M8-62_Bin_157_scaffold_45009_12				BHB10-2_Bin_362_scaffold_128343_2	M3-10_Bin_262_scaffold_69731_4	M3-22_Bin_282_scaffold_19588_5				Meg22_46_Bin_210_scaffold_229940_1		Meg22_1214_Bin_176_scaffold_3287_23	Meg22_1214_Bin_137_scaffold_43408_4	Meg22_46_Bin_89_scaffold_1217_17	Meg22_24_Bin_129_scaffold_1591_4	BHB10-38_Bin_186_scaffold_77068_6	BHB10-38_Bin_9_scaffold_6612_20	M3-30_Bin_374_scaffold_1606_17	SY70-4-3_Bin_44_scaffold_14450_4		Meg19_02_Bin_5_scaffold_31880_4,Meg19_02_Bin_5_scaffold_70955_1		Meg19_46_Bin_228_scaffold_95348_2	Meg22_46_Bin_45_scaffold_15702_4,Meg22_46_Bin_45_scaffold_999_18
	L-Aspartate 4-semialdehyde => L-Homoserine	hom	K00003	homoserine dehydrogenase [EC:1.1.1.3]									M3-44_Bin_198_scaffold_95014_4															AB_03_Bin_160_scaffold_1476_13			M3-22_Bin_282_scaffold_39435_5	M3-44_Bin_119_scaffold_13300_35		LQ108M_Bin_12_scaffold_17_217	Meg22_46_Bin_210_scaffold_55718_5
		thrA	k12524	bifunctional aspartokinase / homoserine dehydrogenase 1 [EC:2.7.2.4 1.1.1.3]
		metL	K12525	bifunctional aspartokinase / homoserine dehydrogenase 2 [EC:2.7.2.4 1.1.1.3]
	L-Homoserine => O-Phospho-L-homoserine	thrB	K00872	homoserine kinase [EC:2.7.1.39]													Meg22_46_Bin_11_scaffold_60617_6	Meg19_1012_Bin_119_scaffold_55979_9	Meg19_46_Bin_239_scaffold_23986_6	Meg22_02_Bin_84_scaffold_174194_1		Meg22_24_Bin_124_scaffold_10970_1	Meg22_46_Bin_213_scaffold_54498_11		M8-62_Bin_157_scaffold_29530_6	M8-62_Bin_326_scaffold_34694_12	SY70-4-11_Bin_40_scaffold_78076_2		BHB10-2_Bin_362_scaffold_128343_3	M3-10_Bin_262_scaffold_69731_3	M3-22_Bin_282_scaffold_19588_6
		thrB2	K02204	homoserine kinase type II [EC:2.7.1.39]
		thrH	K02203	phosphoserine / homoserine phosphotransferase [EC:3.1.3.3 2.7.1.39]																									BHB10-2_Bin_362_scaffold_26829_9	M3-10_Bin_262_scaffold_177397_3	M3-22_Bin_282_scaffold_101348_2
	O-Phospho-L-homoserine => L-Threonine	thrC	K01733	threonine synthase [EC:4.2.3.1]									M3-44_Bin_198_scaffold_204702_2,M3-44_Bin_198_scaffold_72260_3	M8-62_Bin_262_scaffold_309170_2		GCA_005223185_scaffold_17_72	Meg22_46_Bin_11_scaffold_60847_4	Meg19_1012_Bin_119_scaffold_3672_8	Meg19_46_Bin_239_scaffold_69747_4		Meg19_46_Bin_60_scaffold_23777_4	Meg22_24_Bin_124_scaffold_17609_10	Meg22_46_Bin_213_scaffold_20988_1		M8-62_Bin_157_scaffold_11049_2,M8-62_Bin_157_scaffold_196336_2		SY70-4-11_Bin_40_scaffold_13491_1,SY70-4-11_Bin_40_scaffold_55609_3	AB_03_Bin_160_scaffold_14926_1,AB_03_Bin_160_scaffold_38581_2	BHB10-2_Bin_362_scaffold_106562_3,BHB10-2_Bin_362_scaffold_128343_4	M3-10_Bin_262_scaffold_69731_2	M3-22_Bin_282_scaffold_19588_7,M3-22_Bin_282_scaffold_39435_4			LQ108M_Bin_12_scaffold_140_57,LQ108M_Bin_12_scaffold_245_176,LQ108M_Bin_12_scaffold_2_101		Meg22_1012_Bin_348_scaffold_49978_1	Meg22_1214_Bin_176_scaffold_15159_6	Meg22_1214_Bin_137_scaffold_59065_3	Meg22_46_Bin_89_scaffold_2524_9	Meg22_24_Bin_129_scaffold_1414_7,Meg22_24_Bin_129_scaffold_21967_5	BHB10-38_Bin_186_scaffold_5093_4,BHB10-38_Bin_186_scaffold_97245_3	BHB10-38_Bin_9_scaffold_12597_13,BHB10-38_Bin_9_scaffold_39044_20	M3-30_Bin_374_scaffold_7041_14		SY70-4-3_Bin_59_scaffold_13909_4		ex4484_8_scaffold_565_9	Meg19_46_Bin_228_scaffold_75150_2	Meg22_46_Bin_45_scaffold_15752_10,Meg22_46_Bin_45_scaffold_183716_2
	L-Threonine => Glycine + Acetaldehyde	ltaE	K01620	threonine aldolase [EC:4.1.2.48]	Meg22_810_Bin_217_scaffold_126477_2	Meg19_1012_Bin_198_scaffold_15880_9	GCA_002127415_scaffold_55_15	Ga0186947_scaffold_1031_14	Ga0170695_scaffold_1097_2	Meg22_1416_Bin_86_scaffold_124620_1		Meg19_1012_Bin_459_scaffold_5327_27		M8-62_Bin_262_scaffold_136682_5	GCA_003599535_scaffold_1_78	GCA_005223185_scaffold_12_404	Meg22_46_Bin_11_scaffold_246490_4	Meg19_1012_Bin_119_scaffold_50841_7	Meg19_46_Bin_239_scaffold_44922_6	Meg22_02_Bin_84_scaffold_103458_1,Meg22_02_Bin_84_scaffold_74523_1	Meg19_46_Bin_60_scaffold_248025_4	Meg22_24_Bin_124_scaffold_127462_5	Meg22_46_Bin_213_scaffold_23295_13	M3-38_Bin_215_scaffold_237532_3	M8-62_Bin_157_scaffold_26261_9,M8-62_Bin_157_scaffold_9393_10		SY70-4-11_Bin_40_scaffold_67113_2	AB_03_Bin_160_scaffold_24720_2	BHB10-2_Bin_362_scaffold_100670_10,BHB10-2_Bin_362_scaffold_45654_9	M3-10_Bin_262_scaffold_75196_5	M3-22_Bin_282_scaffold_278895_2	M3-44_Bin_119_scaffold_2975_35	GCA_003820615_scaffold_819_1	LQ108M_Bin_12_scaffold_12_50	Meg22_46_Bin_210_scaffold_41187_6	Meg22_1012_Bin_348_scaffold_124627_2	Meg22_1214_Bin_176_scaffold_8385_2	Meg22_1214_Bin_137_scaffold_13071_11	Meg22_46_Bin_89_scaffold_2009_21	Meg22_24_Bin_129_scaffold_5616_1	BHB10-38_Bin_186_scaffold_103240_3	BHB10-38_Bin_9_scaffold_76529_3	M3-30_Bin_374_scaffold_1847_19		SY70-4-3_Bin_59_scaffold_3702_6
	Glycine => Glyoxylate + NH3	DAO, aao	K00273	D-amino-acid oxidase [EC:1.4.3.3]
	Glycine + 2-Oxoglutarate <=> Glyoxylate + L-Glutamate	GGAT	K14272	glutamate--glyoxylate aminotransferase [EC:2.6.1.4 2.6.1.2 2.6.1.44]
		AGXT2	K00827	alanine-glyoxylate transaminase / (R)-3-amino-2-methylpropionate-pyruvate transaminase [EC:2.6.1.44 2.6.1.40]									M3-44_Bin_198_scaffold_125699_3			GCA_005223185_scaffold_6_70												AB_03_Bin_160_scaffold_3106_6	BHB10-2_Bin_362_scaffold_44501_9		M3-22_Bin_282_scaffold_28704_5			LQ108M_Bin_12_scaffold_75_3	Meg22_46_Bin_210_scaffold_62979_1
		AGXT	K00830	alanine-glyoxylate transaminase / serine-glyoxylate transaminase / serine-pyruvate transaminase [EC:2.6.1.44 2.6.1.45 2.6.1.51]								Meg19_1012_Bin_459_scaffold_150_27				GCA_005223185_scaffold_16_257	Meg22_46_Bin_11_scaffold_23868_9	Meg19_1012_Bin_119_scaffold_12333_12	Meg19_46_Bin_239_scaffold_35539_2		Meg19_46_Bin_60_scaffold_28755_2	Meg22_24_Bin_124_scaffold_77584_2	Meg22_46_Bin_213_scaffold_8692_18		M8-62_Bin_157_scaffold_36674_3		SY70-4-11_Bin_40_scaffold_35700_2									Meg22_1012_Bin_348_scaffold_60981_3		Meg22_1214_Bin_137_scaffold_61973_3				BHB10-38_Bin_9_scaffold_166927_3
	Glycine => Serine	glyA, SHMT	K00600	glycine hydroxymethyltransferase [EC:2.1.2.1]	Meg22_810_Bin_217_scaffold_84674_2	Meg19_1012_Bin_198_scaffold_225203_1,Meg19_1012_Bin_198_scaffold_4241_1	GCA_002127415_scaffold_204_2	Ga0186947_scaffold_1003_10				Meg19_1012_Bin_459_scaffold_3639_16		M8-62_Bin_262_scaffold_327880_1	GCA_003599535_scaffold_1_55	GCA_005223185_scaffold_18_11	Meg22_46_Bin_11_scaffold_91193_5	Meg19_1012_Bin_119_scaffold_19495_3	Meg19_46_Bin_239_scaffold_231232_2	Meg22_02_Bin_84_scaffold_406748_4	Meg19_46_Bin_60_scaffold_249272_1,Meg19_46_Bin_60_scaffold_87665_1	Meg22_24_Bin_124_scaffold_90879_4	Meg22_46_Bin_213_scaffold_28495_20	M3-38_Bin_215_scaffold_292972_1	M8-62_Bin_157_scaffold_61682_5,M8-62_Bin_157_scaffold_67932_10	M8-62_Bin_326_scaffold_476198_4	SY70-4-11_Bin_40_scaffold_19244_6	AB_03_Bin_160_scaffold_8711_10	BHB10-2_Bin_362_scaffold_46619_4	M3-10_Bin_262_scaffold_23084_10	M3-22_Bin_282_scaffold_46370_4	M3-44_Bin_119_scaffold_1941_43		LQ108M_Bin_12_scaffold_29_202		Meg22_1012_Bin_348_scaffold_146668_1	Meg22_1214_Bin_176_scaffold_76345_5,Meg22_1214_Bin_176_scaffold_98925_1	Meg22_1214_Bin_137_scaffold_152137_1	Meg22_46_Bin_89_scaffold_177507_1	Meg22_24_Bin_129_scaffold_22139_4	BHB10-38_Bin_186_scaffold_41184_2	BHB10-38_Bin_9_scaffold_12050_6	M3-30_Bin_374_scaffold_1398_24		SY70-4-3_Bin_59_scaffold_40195_2	Meg19_02_Bin_5_scaffold_21083_1	ex4484_8_scaffold_1457_6	Meg19_46_Bin_228_scaffold_19855_9	Meg22_46_Bin_45_scaffold_118967_5
		AGXT	K00830	alanine-glyoxylate transaminase / serine-glyoxylate transaminase / serine-pyruvate transaminase [EC:2.6.1.44 2.6.1.45 2.6.1.51]								Meg19_1012_Bin_459_scaffold_150_27				GCA_005223185_scaffold_16_257	Meg22_46_Bin_11_scaffold_23868_9	Meg19_1012_Bin_119_scaffold_12333_12	Meg19_46_Bin_239_scaffold_35539_2		Meg19_46_Bin_60_scaffold_28755_2	Meg22_24_Bin_124_scaffold_77584_2	Meg22_46_Bin_213_scaffold_8692_18		M8-62_Bin_157_scaffold_36674_3		SY70-4-11_Bin_40_scaffold_35700_2									Meg22_1012_Bin_348_scaffold_60981_3		Meg22_1214_Bin_137_scaffold_61973_3				BHB10-38_Bin_9_scaffold_166927_3
	Serine => pyruvate + NH3	E4.3.1.19, ilvA, tdcB	K01754	threonine dehydratase [EC:4.3.1.19]									M3-44_Bin_198_scaffold_415131_1				Meg22_46_Bin_11_scaffold_50508_3	Meg19_1012_Bin_119_scaffold_24591_3,Meg19_1012_Bin_119_scaffold_6928_10	Meg19_46_Bin_239_scaffold_123041_1,Meg19_46_Bin_239_scaffold_79121_3	Meg22_02_Bin_84_scaffold_15826_3,Meg22_02_Bin_84_scaffold_215564_3	Meg19_46_Bin_60_scaffold_109433_3	Meg22_24_Bin_124_scaffold_308589_4,Meg22_24_Bin_124_scaffold_3726_4	Meg22_46_Bin_213_scaffold_4034_17	M3-38_Bin_215_scaffold_68912_1	M8-62_Bin_157_scaffold_192537_2,M8-62_Bin_157_scaffold_311144_1		SY70-4-11_Bin_40_scaffold_5896_6	AB_03_Bin_160_scaffold_10694_4	BHB10-2_Bin_362_scaffold_451335_2	M3-10_Bin_262_scaffold_126077_4,M3-10_Bin_262_scaffold_177035_2	M3-22_Bin_282_scaffold_16316_2,M3-22_Bin_282_scaffold_22898_3	M3-44_Bin_119_scaffold_3580_19		LQ108M_Bin_12_scaffold_12_290	Meg22_46_Bin_210_scaffold_333661_1								M3-30_Bin_374_scaffold_460_8					Meg19_46_Bin_228_scaffold_58931_6	Meg22_46_Bin_45_scaffold_23180_6
		E4.3.1.17, sdaA, sdaB, tdcG	K01752	L-serine dehydratase [EC:4.3.1.17]														Meg19_1012_Bin_119_scaffold_3672_18	Meg19_46_Bin_239_scaffold_15097_6	Meg22_02_Bin_84_scaffold_95380_3	Meg19_46_Bin_60_scaffold_203020_2	Meg22_24_Bin_124_scaffold_534623_2	Meg22_46_Bin_213_scaffold_17878_7				SY70-4-11_Bin_40_scaffold_28998_2
		SDS, SDH, CHA1	K17989	L-serine/L-threonine ammonia-lyase [EC:4.3.1.17 4.3.1.19]
	L-Serine + L-Homocysteine <=> L-Cystathionine + H2O	CBS	K01697	cystathionine beta-synthase [EC:4.2.1.22]																					M8-62_Bin_157_scaffold_106647_3				BHB10-2_Bin_362_scaffold_367627_1		M3-22_Bin_282_scaffold_6282_8,M3-22_Bin_282_scaffold_97655_3	M3-44_Bin_119_scaffold_3555_10	GCA_003820615_scaffold_717_4	LQ108M_Bin_12_scaffold_12_597,LQ108M_Bin_12_scaffold_450_12									M3-30_Bin_374_scaffold_2497_33						Meg22_46_Bin_45_scaffold_139008_3,Meg22_46_Bin_45_scaffold_62026_3
		cysO	K10150	cysteine synthase / O-phosphoserine sulfhydrylase / cystathionine beta-synthase [EC:2.5.1.47 2.5.1.65 4.2.1.22]
	O-Acetyl-L-serine + L-Homocysteine <=> L-Cystathionine + Acetate	mccA	K17216	cystathionine beta-synthase (O-acetyl-L-serine) [EC:2.5.1.134]
	L-Cystathionine + H2O <=> L-Homocysteine + NH3 + Pyruvate	CCBL	K00816	kynurenine---oxoglutarate transaminase / cysteine-S-conjugate beta-lyase / glutamine---phenylpyruvate transaminase [EC:2.6.1.7 4.4.1.13 2.6.1.64]																																									SY70-4-3_Bin_59_scaffold_13909_1			Meg19_46_Bin_228_scaffold_91090_5	Meg22_46_Bin_45_scaffold_113175_4
		metC	K01760	cysteine-S-conjugate beta-lyase [EC:4.4.1.13]																					M8-62_Bin_157_scaffold_106647_2				BHB10-2_Bin_362_scaffold_122927_4,BHB10-2_Bin_362_scaffold_367627_2		M3-22_Bin_282_scaffold_6282_9,M3-22_Bin_282_scaffold_97655_5	M3-44_Bin_119_scaffold_3555_9																	Meg22_46_Bin_45_scaffold_139008_2,Meg22_46_Bin_45_scaffold_150504_2
		patB, malY	K14155	cysteine-S-conjugate beta-lyase [EC:4.4.1.13]														Meg19_1012_Bin_119_scaffold_26256_2
	L-Cystathionine + H2O <=> L-Cysteine + NH3 + 2-Oxobutanoate	CTH	K01758	cystathionine gamma-lyase [EC:4.4.1.1]																					M8-62_Bin_157_scaffold_106647_2																		M3-30_Bin_374_scaffold_2497_32						Meg22_46_Bin_45_scaffold_139008_2,Meg22_46_Bin_45_scaffold_150504_2
		mccB	K17217	cystathionine gamma-lyase / homocysteine desulfhydrase [EC:4.4.1.1 4.4.1.2]																					M8-62_Bin_157_scaffold_476380_2
	L-Cysteine + H2O <=> Hydrogen sulfide + Pyruvate + NH3	CTH	K01758	cystathionine gamma-lyase [EC:4.4.1.1]																					M8-62_Bin_157_scaffold_106647_2																		M3-30_Bin_374_scaffold_2497_32						Meg22_46_Bin_45_scaffold_139008_2,Meg22_46_Bin_45_scaffold_150504_2
		mccB	K17217	cystathionine gamma-lyase / homocysteine desulfhydrase [EC:4.4.1.1 4.4.1.2]																					M8-62_Bin_157_scaffold_476380_2
		LCD	K22207	L-cysteine desulfhydrase [EC:4.4.1.28]
		E4.4.1.28	K20021	L-cysteine desulfidase [EC:4.4.1.28]
	L-Lysine + 2-Oxoglutarate => Saccharopine	LYS1	K00290	saccharopine dehydrogenase (NAD+, L-lysine forming) [EC:1.5.1.7]	Meg22_810_Bin_217_scaffold_40978_4									M8-62_Bin_262_scaffold_20089_12		GCA_005223185_scaffold_16_275															M3-22_Bin_282_scaffold_188297_3			LQ108M_Bin_12_scaffold_359_62	Meg22_46_Bin_210_scaffold_211359_2
		AASS	K14157	alpha-aminoadipic semialdehyde synthase [EC:1.5.1.8 1.5.1.9]	Meg22_810_Bin_217_scaffold_40978_3								M3-44_Bin_198_scaffold_157291_2	M8-62_Bin_262_scaffold_20089_13		GCA_005223185_scaffold_16_276																M3-44_Bin_119_scaffold_7646_25
	Saccharonine => L-glutamate + L-Allysine	AASS	K14157	alpha-aminoadipic semialdehyde synthase [EC:1.5.1.8 1.5.1.9]	Meg22_810_Bin_217_scaffold_40978_3								M3-44_Bin_198_scaffold_157291_2	M8-62_Bin_262_scaffold_20089_13		GCA_005223185_scaffold_16_276																M3-44_Bin_119_scaffold_7646_25
		LYS9	K00293	saccharopine dehydrogenase (NADP+, L-glutamate forming) [EC:1.5.1.10]																														LQ108M_Bin_12_scaffold_359_60
		SPE3-LYS9	K24034	spermidine synthase / saccharopine dehydrogenase (NADP+, L-glutamate-forming) [EC:2.5.1.16 1.5.1.10]
	L-Allysine => L-2-Aminoadipate	ALDH7A1	K14085	aldehyde dehydrogenase family 7 member A1 [EC:1.2.1.31 1.2.1.8 1.2.1.3]																													GCA_003820615_scaffold_237_9	LQ108M_Bin_12_scaffold_12_733
	L-2-Aminoadipate + 2-Oxoglutarate => 2-Oxoadipate + L-Glutamate	AADAT, KAT2	K00825	kynurenine/2-aminoadipate aminotransferase [EC:2.6.1.7 2.6.1.39]																																													Meg22_46_Bin_45_scaffold_82500_3
	2-Oxoadipate => Glutaryl-CoA	DHKTD1	K15791	probable 2-oxoglutarate dehydrogenase E1 component DHKTD1 [EC:1.2.4.2]
		DLST, sucB	K00658	2-oxoglutarate dehydrogenase E2 component (dihydrolipoamide succinyltransferase) [EC:2.3.1.61]										M8-62_Bin_262_scaffold_65955_3														AB_03_Bin_160_scaffold_104675_4	BHB10-2_Bin_362_scaffold_151435_3	M3-10_Bin_262_scaffold_68548_2	M3-22_Bin_282_scaffold_9829_4	M3-44_Bin_119_scaffold_3859_23	GCA_003820615_scaffold_744_1	LQ108M_Bin_12_scaffold_75_120
		DLD, lpd, pdhD	K00382	dihydrolipoamide dehydrogenase [EC:1.8.1.4]		Meg19_1012_Bin_198_scaffold_242_53,Meg19_1012_Bin_198_scaffold_9858_7	GCA_002127415_scaffold_357_3	Ga0186947_scaffold_1044_6	Ga0170695_scaffold_1004_21		Meg22_46_Bin_23_scaffold_265305_1	Meg19_1012_Bin_459_scaffold_2527_9,Meg19_1012_Bin_459_scaffold_7079_15		M8-62_Bin_262_scaffold_65955_9	GCA_003599535_scaffold_2_84	GCA_005223185_scaffold_6_27,GCA_005223185_scaffold_7_77	Meg22_46_Bin_11_scaffold_13483_8	Meg19_1012_Bin_119_scaffold_13224_4,Meg19_1012_Bin_119_scaffold_8212_5	Meg19_46_Bin_239_scaffold_120758_3,Meg19_46_Bin_239_scaffold_92487_10		Meg19_46_Bin_60_scaffold_46929_1	Meg22_24_Bin_124_scaffold_177418_2,Meg22_24_Bin_124_scaffold_226376_3			M8-62_Bin_157_scaffold_101509_4,M8-62_Bin_157_scaffold_2843_16		SY70-4-11_Bin_40_scaffold_27664_1		BHB10-2_Bin_362_scaffold_81027_7	M3-10_Bin_262_scaffold_68548_5	M3-22_Bin_282_scaffold_9829_7	M3-44_Bin_119_scaffold_3859_26	GCA_003820615_scaffold_744_2	LQ108M_Bin_12_scaffold_75_121		Meg22_1012_Bin_348_scaffold_72704_5	Meg22_1214_Bin_176_scaffold_25418_12	Meg22_1214_Bin_137_scaffold_20273_12	Meg22_46_Bin_89_scaffold_4642_5	Meg22_24_Bin_129_scaffold_93407_2		BHB10-38_Bin_9_scaffold_128692_3	M3-30_Bin_374_scaffold_1200_5	SY70-4-3_Bin_44_scaffold_36494_2	SY70-4-3_Bin_59_scaffold_40603_2	Meg19_02_Bin_5_scaffold_60918_3		Meg19_46_Bin_228_scaffold_12362_8	Meg22_46_Bin_45_scaffold_230053_1
	Glutaryl-CoA => Crotonoyl-CoA	GCDH, gcdH	K00252	glutaryl-CoA dehydrogenase [EC:1.3.8.6]				Ga0186947_scaffold_1009_33							GCA_003599535_scaffold_75_6	GCA_005223185_scaffold_4_144									M8-62_Bin_157_scaffold_7133_14				BHB10-2_Bin_362_scaffold_80712_3			M3-44_Bin_119_scaffold_1082_53		LQ108M_Bin_12_scaffold_245_117
	Crotonoyl-CoA => 3-Hydroxybutanoyl-CoA	paaF, echA	K01692	enoyl-CoA hydratase [EC:4.2.1.17]		Meg19_1012_Bin_198_scaffold_31476_3	GCA_002127415_scaffold_168_3	Ga0186947_scaffold_1001_38	Ga0170695_scaffold_1085_4			Meg19_1012_Bin_459_scaffold_311_26	M3-44_Bin_198_scaffold_149342_1,M3-44_Bin_198_scaffold_76000_2	M8-62_Bin_262_scaffold_109697_3,M8-62_Bin_262_scaffold_24180_11	GCA_003599535_scaffold_77_7	GCA_005223185_scaffold_18_118,GCA_005223185_scaffold_4_152		Meg19_1012_Bin_119_scaffold_1690_12,Meg19_1012_Bin_119_scaffold_9511_15	Meg19_46_Bin_239_scaffold_24479_4,Meg19_46_Bin_239_scaffold_6977_2	Meg22_02_Bin_84_scaffold_75170_4	Meg19_46_Bin_60_scaffold_54044_5	Meg22_24_Bin_124_scaffold_4524_13	Meg22_46_Bin_213_scaffold_292905_2	M3-38_Bin_215_scaffold_185366_2	M8-62_Bin_157_scaffold_26944_1,M8-62_Bin_157_scaffold_19785_13,M8-62_Bin_157_scaffold_249014_2,M8-62_Bin_157_scaffold_249014_3		SY70-4-11_Bin_40_scaffold_31703_3,SY70-4-11_Bin_40_scaffold_663_13	AB_03_Bin_160_scaffold_30608_1,AB_03_Bin_160_scaffold_3875_7,AB_03_Bin_160_scaffold_83688_3,AB_03_Bin_160_scaffold_9903_7	BHB10-2_Bin_362_scaffold_107587_2,BHB10-2_Bin_362_scaffold_107587_9,BHB10-2_Bin_362_scaffold_18493_14,BHB10-2_Bin_362_scaffold_18887_11,BHB10-2_Bin_362_scaffold_59039_2,BHB10-2_Bin_362_scaffold_9299_9	M3-10_Bin_262_scaffold_49807_3,M3-10_Bin_262_scaffold_49807_9,M3-10_Bin_262_scaffold_64816_6,M3-10_Bin_262_scaffold_92995_2	M3-22_Bin_282_scaffold_11720_13,M3-22_Bin_282_scaffold_7234_11,M3-22_Bin_282_scaffold_8062_8	M3-44_Bin_119_scaffold_2615_10,M3-44_Bin_119_scaffold_4891_34,M3-44_Bin_119_scaffold_5235_7	GCA_003820615_scaffold_200_1	LQ108M_Bin_12_scaffold_140_123,LQ108M_Bin_12_scaffold_2_467	Meg22_46_Bin_210_scaffold_115641_4,Meg22_46_Bin_210_scaffold_279316_2		Meg22_1214_Bin_176_scaffold_13089_5,Meg22_1214_Bin_176_scaffold_77407_4	Meg22_1214_Bin_137_scaffold_6127_15	Meg22_46_Bin_89_scaffold_101396_4,Meg22_46_Bin_89_scaffold_23233_12	Meg22_24_Bin_129_scaffold_28510_4,Meg22_24_Bin_129_scaffold_55078_3	BHB10-38_Bin_186_scaffold_25401_8		M3-30_Bin_374_scaffold_1200_28,M3-30_Bin_374_scaffold_1320_3	SY70-4-3_Bin_44_scaffold_35950_1		Meg19_02_Bin_5_scaffold_190459_2	ex4484_8_scaffold_879_3,ex4484_8_scaffold_879_8		Meg22_46_Bin_45_scaffold_122773_2,Meg22_46_Bin_45_scaffold_140957_3
		fadB	K01825	3-hydroxyacyl-CoA dehydrogenase / enoyl-CoA hydratase / 3-hydroxybutyryl-CoA epimerase / enoyl-CoA isomerase [EC:1.1.1.35 4.2.1.17 5.1.2.3 5.3.3.8]																									BHB10-2_Bin_362_scaffold_136778_4
		fadJ	K01782	3-hydroxyacyl-CoA dehydrogenase / enoyl-CoA hydratase / 3-hydroxybutyryl-CoA epimerase [EC:1.1.1.35 4.2.1.17 5.1.2.3]				Ga0186947_scaffold_1001_89				Meg19_1012_Bin_459_scaffold_5327_15		M8-62_Bin_262_scaffold_103744_4		GCA_005223185_scaffold_7_404		Meg19_1012_Bin_119_scaffold_7505_13													M3-22_Bin_282_scaffold_113671_3	M3-44_Bin_119_scaffold_3275_23				Meg22_1012_Bin_348_scaffold_26056_5	Meg22_1214_Bin_176_scaffold_5395_30
		HADHA	K07515	enoyl-CoA hydratase / long-chain 3-hydroxyacyl-CoA dehydrogenase [EC:4.2.1.17 1.1.1.211]																																		Meg22_1214_Bin_137_scaffold_156989_3
		EHHADH	K07514	enoyl-CoA hydratase / 3-hydroxyacyl-CoA dehydrogenase / 3,2-trans-enoyl-CoA isomerase [EC:4.2.1.17 1.1.1.35 5.3.3.8]
		ECHS1	K07511	enoyl-CoA hydratase [EC:4.2.1.17]
	3-Hydroxybutanoyl-CoA => Acetoacetyl-CoA	HADH	K00022	3-hydroxyacyl-CoA dehydrogenase [EC:1.1.1.35]
		fadB	K01825	3-hydroxyacyl-CoA dehydrogenase / enoyl-CoA hydratase / 3-hydroxybutyryl-CoA epimerase / enoyl-CoA isomerase [EC:1.1.1.35 4.2.1.17 5.1.2.3 5.3.3.8]																									BHB10-2_Bin_362_scaffold_136778_4
		fadJ	K01782	3-hydroxyacyl-CoA dehydrogenase / enoyl-CoA hydratase / 3-hydroxybutyryl-CoA epimerase [EC:1.1.1.35 4.2.1.17 5.1.2.3]				Ga0186947_scaffold_1001_89				Meg19_1012_Bin_459_scaffold_5327_15		M8-62_Bin_262_scaffold_103744_4		GCA_005223185_scaffold_7_404		Meg19_1012_Bin_119_scaffold_7505_13													M3-22_Bin_282_scaffold_113671_3	M3-44_Bin_119_scaffold_3275_23				Meg22_1012_Bin_348_scaffold_26056_5	Meg22_1214_Bin_176_scaffold_5395_30
		EHHADH	K07514	enoyl-CoA hydratase / 3-hydroxyacyl-CoA dehydrogenase / 3,2-trans-enoyl-CoA isomerase [EC:4.2.1.17 1.1.1.35 5.3.3.8]
	Acetoacetyl-CoA => Acetyl-CoA	ACAT, atoB	K00626	acetyl-CoA C-acetyltransferase [EC:2.3.1.9]	Meg22_810_Bin_217_scaffold_42565_9,Meg22_810_Bin_217_scaffold_18020_7,Meg22_810_Bin_217_scaffold_22744_18	Meg19_1012_Bin_198_scaffold_2835_38,Meg19_1012_Bin_198_scaffold_14744_5	GCA_002127415_scaffold_43_8,GCA_002127415_scaffold_176_2,GCA_002127415_scaffold_345_11	Ga0186947_scaffold_1001_35,Ga0186947_scaffold_1001_52	Ga0170695_scaffold_1016_9	Meg22_1416_Bin_86_scaffold_232668_3	Meg22_46_Bin_23_scaffold_115531_2,Meg22_46_Bin_23_scaffold_37312_7	Meg19_1012_Bin_459_scaffold_3580_23,Meg19_1012_Bin_459_scaffold_537_56	M3-44_Bin_198_scaffold_114127_5	M8-62_Bin_262_scaffold_13149_6,M8-62_Bin_262_scaffold_287643_4	GCA_003599535_scaffold_115_8	GCA_005223185_scaffold_12_63,GCA_005223185_scaffold_4_135	Meg22_46_Bin_11_scaffold_151034_2,Meg22_46_Bin_11_scaffold_151979_1,Meg22_46_Bin_11_scaffold_40431_3	Meg19_1012_Bin_119_scaffold_124130_2,Meg19_1012_Bin_119_scaffold_70087_2,Meg19_1012_Bin_119_scaffold_134125_3,Meg19_1012_Bin_119_scaffold_1690_9,Meg19_1012_Bin_119_scaffold_62368_1,Meg19_1012_Bin_119_scaffold_6483_2	Meg19_46_Bin_239_scaffold_70870_2,Meg19_46_Bin_239_scaffold_102561_3,Meg19_46_Bin_239_scaffold_16982_11,Meg19_46_Bin_239_scaffold_24479_7	Meg22_02_Bin_84_scaffold_171396_2,Meg22_02_Bin_84_scaffold_219896_2,Meg22_02_Bin_84_scaffold_129827_2,Meg22_02_Bin_84_scaffold_75170_1	Meg19_46_Bin_60_scaffold_150441_3,Meg19_46_Bin_60_scaffold_54044_2,Meg19_46_Bin_60_scaffold_60629_3,Meg19_46_Bin_60_scaffold_90807_4	Meg22_24_Bin_124_scaffold_52883_5,Meg22_24_Bin_124_scaffold_4524_10,Meg22_24_Bin_124_scaffold_76367_4	Meg22_46_Bin_213_scaffold_72839_2,Meg22_46_Bin_213_scaffold_22624_13,Meg22_46_Bin_213_scaffold_247780_5,Meg22_46_Bin_213_scaffold_29925_6	M3-38_Bin_215_scaffold_171373_3,M3-38_Bin_215_scaffold_207620_4	M8-62_Bin_157_scaffold_1879_31,M8-62_Bin_157_scaffold_19785_10,M8-62_Bin_157_scaffold_321820_2,M8-62_Bin_157_scaffold_424266_3,M8-62_Bin_157_scaffold_468900_1,M8-62_Bin_157_scaffold_73114_4	M8-62_Bin_326_scaffold_127806_4,M8-62_Bin_326_scaffold_26233_7	SY70-4-11_Bin_40_scaffold_22321_2,SY70-4-11_Bin_40_scaffold_24752_1	AB_03_Bin_160_scaffold_24007_6,AB_03_Bin_160_scaffold_22105_2,AB_03_Bin_160_scaffold_37158_2	BHB10-2_Bin_362_scaffold_102471_3,BHB10-2_Bin_362_scaffold_468457_2,BHB10-2_Bin_362_scaffold_80493_4	M3-10_Bin_262_scaffold_46204_4,M3-10_Bin_262_scaffold_17711_8,M3-10_Bin_262_scaffold_61025_8,M3-10_Bin_262_scaffold_69042_4,M3-10_Bin_262_scaffold_92924_4	M3-22_Bin_282_scaffold_10966_4,M3-22_Bin_282_scaffold_1801_11,M3-22_Bin_282_scaffold_1801_36,M3-22_Bin_282_scaffold_42809_2,M3-22_Bin_282_scaffold_73324_6,M3-22_Bin_282_scaffold_80161_2	M3-44_Bin_119_scaffold_4891_32,M3-44_Bin_119_scaffold_978_53,M3-44_Bin_119_scaffold_27482_3,M3-44_Bin_119_scaffold_3275_24,M3-44_Bin_119_scaffold_6996_16,M3-44_Bin_119_scaffold_7646_22	GCA_003820615_scaffold_444_2,GCA_003820615_scaffold_817_3	LQ108M_Bin_12_scaffold_12_183,LQ108M_Bin_12_scaffold_288_94,LQ108M_Bin_12_scaffold_29_215,LQ108M_Bin_12_scaffold_2_466	Meg22_46_Bin_210_scaffold_13377_4,Meg22_46_Bin_210_scaffold_229419_3	Meg22_1012_Bin_348_scaffold_151683_2,Meg22_1012_Bin_348_scaffold_40014_5	Meg22_1214_Bin_176_scaffold_13089_7,Meg22_1214_Bin_176_scaffold_3507_2	Meg22_1214_Bin_137_scaffold_165252_3,Meg22_1214_Bin_137_scaffold_81492_3	Meg22_46_Bin_89_scaffold_23233_14,Meg22_46_Bin_89_scaffold_251467_2,Meg22_46_Bin_89_scaffold_6073_7,Meg22_46_Bin_89_scaffold_14514_2	Meg22_24_Bin_129_scaffold_24855_6,Meg22_24_Bin_129_scaffold_55078_5	BHB10-38_Bin_186_scaffold_25401_6,BHB10-38_Bin_186_scaffold_69292_9,BHB10-38_Bin_186_scaffold_86183_6	BHB10-38_Bin_9_scaffold_9385_23,BHB10-38_Bin_9_scaffold_52968_4,BHB10-38_Bin_9_scaffold_76775_2	M3-30_Bin_374_scaffold_1200_26,M3-30_Bin_374_scaffold_1320_25,M3-30_Bin_374_scaffold_1506_16	SY70-4-3_Bin_44_scaffold_35950_3	SY70-4-3_Bin_59_scaffold_15829_6	Meg19_02_Bin_5_scaffold_172171_2,Meg19_02_Bin_5_scaffold_35349_4	ex4484_8_scaffold_1440_10,ex4484_8_scaffold_2954_12	Meg19_46_Bin_228_scaffold_23316_3,Meg19_46_Bin_228_scaffold_366218_2	Meg22_46_Bin_45_scaffold_100768_3
	L-Lysine => L-β-Lysine	kamA	K01843	lysine 2,3-aminomutase [EC:5.4.3.2]			GCA_002127415_scaffold_290_10		Ga0170695_scaffold_1084_1	Meg22_1416_Bin_86_scaffold_48325_5		Meg19_1012_Bin_459_scaffold_55_96	M3-44_Bin_198_scaffold_10919_15,M3-44_Bin_198_scaffold_43148_7	M8-62_Bin_262_scaffold_83918_2	GCA_003599535_scaffold_17_29	GCA_005223185_scaffold_7_165		Meg19_1012_Bin_119_scaffold_6444_6								M8-62_Bin_326_scaffold_316449_2											Meg22_1214_Bin_176_scaffold_74511_2		Meg22_46_Bin_89_scaffold_1873_3	Meg22_24_Bin_129_scaffold_5562_3	BHB10-38_Bin_186_scaffold_326881_2		M3-30_Bin_374_scaffold_410_19					Meg19_46_Bin_228_scaffold_34254_3
	L-β-Lysine => 3,5-Diaminohexanoate	kamD	K01844	beta-lysine 5,6-aminomutase alpha subunit [EC:5.4.3.3]
		kamE	K18011	beta-lysine 5,6-aminomutase beta subunit [EC:5.4.3.3]
	3,5-Diaminohexanoate => 5-Amino-3-oxohexanoate	kdd	K18012	L-erythro-3,5-diaminohexanoate dehydrogenase [EC:1.4.1.11]
	5-Amino-3-oxohexanoate + Acetyl-CoA => L-3-Aminobutyryl-CoA + Acetoacetate	kce	K18013	3-keto-5-aminohexanoate cleavage enzyme [EC:2.3.1.247]																														LQ108M_Bin_12_scaffold_354_38														Meg19_46_Bin_228_scaffold_47549_6	Meg22_46_Bin_45_scaffold_75531_6
	L-3-Aminobutyryl-CoA => Crotonoyl-CoA + NH3	kal	K18014	3-aminobutyryl-CoA ammonia-lyase [EC:4.3.1.14]
	L-Lysine => 5-Aminopentanamide	davB	K00468	lysine 2-monooxygenase [EC:1.13.12.2]
	5-Aminopentanamide => 5-Aminopentanoate + NH3	davA	K01506	5-aminopentanamidase [EC:3.5.1.30]	Meg22_810_Bin_217_scaffold_52061_5	Meg19_1012_Bin_198_scaffold_18627_4	GCA_002127415_scaffold_320_8	Ga0186947_scaffold_1005_40					M3-44_Bin_198_scaffold_84822_6			GCA_005223185_scaffold_18_193												AB_03_Bin_160_scaffold_9554_2	BHB10-2_Bin_362_scaffold_59379_5	M3-10_Bin_262_scaffold_139270_3	M3-22_Bin_282_scaffold_17379_1	M3-44_Bin_119_scaffold_8555_10				Meg22_1012_Bin_348_scaffold_88767_3	Meg22_1214_Bin_176_scaffold_40246_2	Meg22_1214_Bin_137_scaffold_37817_4	Meg22_46_Bin_89_scaffold_13279_3				M3-30_Bin_374_scaffold_395_48				ex4484_8_scaffold_1591_12,ex4484_8_scaffold_2947_8	Meg19_46_Bin_228_scaffold_71630_3
	5-Aminopentanoate + 2-Oxoglutarate <=> 5-Oxopentanoate + L-Glutamate	davT, gabT	K14268	5-aminovalerate/4-aminobutyrate aminotransferase [EC:2.6.1.48 2.6.1.19]
		gabT	K07250	4-aminobutyrate aminotransferase / (S)-3-amino-2-methylpropionate transaminase / 5-aminovalerate transaminase [EC:2.6.1.19 2.6.1.22 2.6.1.48]
	5-Oxopentanoate => Glutarate	gabD	K00135	succinate-semialdehyde dehydrogenase / glutarate-semialdehyde dehydrogenase [EC:1.2.1.16 1.2.1.79 1.2.1.20]														Meg19_1012_Bin_119_scaffold_71216_3							M8-62_Bin_157_scaffold_7773_12	M8-62_Bin_326_scaffold_195765_2	SY70-4-11_Bin_40_scaffold_10864_6,SY70-4-11_Bin_40_scaffold_40296_3
	Glutarate + 2-Oxoglutarate => 2-Hydroxyglutarate + Succinate	csiD	K15737	glutarate dioxygenase [EC:1.14.11.64]
	2-Hydroxyglutarate => 2-Oxoglutarate	lhgO	K15736	(S)-2-hydroxyglutarate dehydrogenase [EC:1.1.5.13]																						M8-62_Bin_326_scaffold_42531_5						M3-44_Bin_119_scaffold_371536_2									BHB10-38_Bin_186_scaffold_312343_2
	L-Histidine <=> Urocanate + NH3	hutH, HAL	K01745	histidine ammonia-lyase [EC:4.3.1.3]		Meg19_1012_Bin_198_scaffold_16588_3	GCA_002127415_scaffold_184_1					Meg19_1012_Bin_459_scaffold_15339_4	M3-44_Bin_198_scaffold_65471_3		GCA_003599535_scaffold_53_18,GCA_003599535_scaffold_86_9	GCA_005223185_scaffold_14_88		Meg19_1012_Bin_119_scaffold_21474_6	Meg19_46_Bin_239_scaffold_109986_3	Meg22_02_Bin_84_scaffold_252460_2	Meg19_46_Bin_60_scaffold_47335_2	Meg22_24_Bin_124_scaffold_217036_2	Meg22_46_Bin_213_scaffold_117282_5		M8-62_Bin_157_scaffold_80951_3	M8-62_Bin_326_scaffold_198956_1		AB_03_Bin_160_scaffold_73555_2		M3-10_Bin_262_scaffold_129257_2	M3-22_Bin_282_scaffold_73324_2	M3-44_Bin_119_scaffold_28172_5	GCA_003820615_scaffold_658_1,GCA_003820615_scaffold_808_4	LQ108M_Bin_12_scaffold_29_122		Meg22_1012_Bin_348_scaffold_69893_2	Meg22_1214_Bin_176_scaffold_31692_7	Meg22_1214_Bin_137_scaffold_54652_3	Meg22_46_Bin_89_scaffold_13495_3	Meg22_24_Bin_129_scaffold_48446_2		BHB10-38_Bin_9_scaffold_13936_26	M3-30_Bin_374_scaffold_381_47	SY70-4-3_Bin_44_scaffold_38475_2	SY70-4-3_Bin_59_scaffold_5235_2		ex4484_8_scaffold_557_7,ex4484_8_scaffold_900_8	Meg19_46_Bin_228_scaffold_111226_2	Meg22_46_Bin_45_scaffold_245019_2
	Urocanate => 4-Imidazolone-5-propanoate	hutU, UROC1	K01712	urocanate hydratase [EC:4.2.1.49]	Meg22_810_Bin_217_scaffold_60965_1	Meg19_1012_Bin_198_scaffold_783_25	GCA_002127415_scaffold_76_11	Ga0186947_scaffold_1013_16	Ga0170695_scaffold_1063_2			Meg19_1012_Bin_459_scaffold_3158_1	M3-44_Bin_198_scaffold_184273_2	M8-62_Bin_262_scaffold_21211_12		GCA_005223185_scaffold_16_250		Meg19_1012_Bin_119_scaffold_50044_3	Meg19_46_Bin_239_scaffold_101313_1	Meg22_02_Bin_84_scaffold_54494_1	Meg19_46_Bin_60_scaffold_145679_1	Meg22_24_Bin_124_scaffold_37070_4	Meg22_46_Bin_213_scaffold_22547_2		M8-62_Bin_157_scaffold_114077_3,M8-62_Bin_157_scaffold_180857_1			AB_03_Bin_160_scaffold_73555_3	BHB10-2_Bin_362_scaffold_283278_2		M3-22_Bin_282_scaffold_40518_4	M3-44_Bin_119_scaffold_7160_10	GCA_003820615_scaffold_697_1	LQ108M_Bin_12_scaffold_29_123			Meg22_1214_Bin_176_scaffold_11506_10		Meg22_46_Bin_89_scaffold_1009_13	Meg22_24_Bin_129_scaffold_2257_11	BHB10-38_Bin_186_scaffold_298031_1	BHB10-38_Bin_9_scaffold_140451_2	M3-30_Bin_374_scaffold_951_19		SY70-4-3_Bin_59_scaffold_37923_2,SY70-4-3_Bin_59_scaffold_67947_1	Meg19_02_Bin_5_scaffold_176302_1,Meg19_02_Bin_5_scaffold_179704_1	ex4484_8_scaffold_616_20		Meg22_46_Bin_45_scaffold_82211_2
	4-Imidazolone-5-propanoate => N-Formimino-L-glutamate	hutI, AMDHD1	K01468	imidazolonepropionase [EC:3.5.2.7]		Meg19_1012_Bin_198_scaffold_5796_10	GCA_002127415_scaffold_60_3	Ga0186947_scaffold_1010_8		Meg22_1416_Bin_86_scaffold_183856_2	Meg22_46_Bin_23_scaffold_299125_2	Meg19_1012_Bin_459_scaffold_515_4				GCA_005223185_scaffold_16_248		Meg19_1012_Bin_119_scaffold_50044_2	Meg19_46_Bin_239_scaffold_101313_2			Meg22_24_Bin_124_scaffold_37070_3		M3-38_Bin_215_scaffold_225075_2	M8-62_Bin_157_scaffold_114077_4,M8-62_Bin_157_scaffold_434458_1		SY70-4-11_Bin_40_scaffold_65760_2	AB_03_Bin_160_scaffold_35679_4	BHB10-2_Bin_362_scaffold_283278_1	M3-10_Bin_262_scaffold_504878_1		M3-44_Bin_119_scaffold_7160_11		LQ108M_Bin_12_scaffold_29_124	Meg22_46_Bin_210_scaffold_263402_2		Meg22_1214_Bin_176_scaffold_121384_3		Meg22_46_Bin_89_scaffold_1009_14	Meg22_24_Bin_129_scaffold_2257_12	BHB10-38_Bin_186_scaffold_298031_2	BHB10-38_Bin_9_scaffold_140451_3	M3-30_Bin_374_scaffold_951_18	SY70-4-3_Bin_44_scaffold_52843_2	SY70-4-3_Bin_59_scaffold_37923_3,SY70-4-3_Bin_59_scaffold_67947_2	Meg19_02_Bin_5_scaffold_150844_2,Meg19_02_Bin_5_scaffold_34418_6,Meg19_02_Bin_5_scaffold_81142_3	ex4484_8_scaffold_616_19	Meg19_46_Bin_228_scaffold_13685_1
	N-Formimino-L-glutamate => L-Glutamate	hutG	K01479	formiminoglutamase [EC:3.5.3.8]
		fctD	K00603	glutamate formiminotransferase / 5-formyltetrahydrofolate cyclo-ligase [EC:2.1.2.5 6.3.3.2]																																										Meg19_02_Bin_5_scaffold_34418_5,Meg19_02_Bin_5_scaffold_81142_2	ex4484_8_scaffold_616_18	Meg19_46_Bin_228_scaffold_13685_2	Meg22_46_Bin_45_scaffold_272082_2
		FTCD	K13990	glutamate formiminotransferase / formiminotetrahydrofolate cyclodeaminase [EC:2.1.2.5 4.3.1.4]	Meg22_810_Bin_217_scaffold_7962_14	Meg19_1012_Bin_198_scaffold_12827_3	GCA_002127415_scaffold_312_7	Ga0186947_scaffold_1025_10	Ga0170695_scaffold_1020_21	Meg22_1416_Bin_86_scaffold_97320_2	Meg22_46_Bin_23_scaffold_209899_3	Meg19_1012_Bin_459_scaffold_284_145		M8-62_Bin_262_scaffold_82326_4	GCA_003599535_scaffold_99_11	GCA_005223185_scaffold_12_318	Meg22_46_Bin_11_scaffold_70877_2	Meg19_1012_Bin_119_scaffold_9303_3	Meg19_46_Bin_239_scaffold_37820_3	Meg22_02_Bin_84_scaffold_26360_4	Meg19_46_Bin_60_scaffold_61747_3	Meg22_24_Bin_124_scaffold_77464_5	Meg22_46_Bin_213_scaffold_92412_11		M8-62_Bin_157_scaffold_26887_9	M8-62_Bin_326_scaffold_117743_1	SY70-4-11_Bin_40_scaffold_22887_2	AB_03_Bin_160_scaffold_6983_2	BHB10-2_Bin_362_scaffold_26829_10	M3-10_Bin_262_scaffold_177397_2	M3-22_Bin_282_scaffold_101348_3	M3-44_Bin_119_scaffold_15185_19	GCA_003820615_scaffold_412_2	LQ108M_Bin_12_scaffold_75_37	Meg22_46_Bin_210_scaffold_246158_2	Meg22_1012_Bin_348_scaffold_62298_2	Meg22_1214_Bin_176_scaffold_85027_1	Meg22_1214_Bin_137_scaffold_190786_2		Meg22_24_Bin_129_scaffold_266194_2	BHB10-38_Bin_186_scaffold_29434_9	BHB10-38_Bin_9_scaffold_22350_19	M3-30_Bin_374_scaffold_1979_1		SY70-4-3_Bin_59_scaffold_5029_7		ex4484_8_scaffold_616_18
	N-Formimino-L-glutamate => N-Formyl-L-glutamate + NH3	hutF	K05603	formimidoylglutamate deiminase [EC:3.5.3.13]
	N-Formyl-L-glutamate => Formate + L-Glutamate	hutG	K01458	N-formylglutamate deformylase [EC:3.5.1.68]																												M3-44_Bin_119_scaffold_4237_4		LQ108M_Bin_12_scaffold_245_185	Meg22_46_Bin_210_scaffold_80669_2
	L-Tyrosine => 4-Hydroxyphenylpyruvate + NH3	IL4I1	K03334	L-amino-acid oxidase [EC:1.4.3.2]
		pdh	K00270	phenylalanine dehydrogenase [EC:1.4.1.20]
	L-Tyrosine + 2-Oxoglutarate <=> 4-Hydroxyphenylpyruvate + L-Glutamate	TAT	K00815	tyrosine aminotransferase [EC:2.6.1.5]
		ARO8	K00838	aromatic amino acid aminotransferase I / 2-aminoadipate transaminase [EC:2.6.1.57 2.6.1.39 2.6.1.27 2.6.1.5]
		tyrB	K00832	aromatic-amino-acid transaminase [EC:2.6.1.57]
		ARO9	K05821	aromatic amino acid aminotransferase II [EC:2.6.1.58 2.6.1.28]
		hisC	K00817	histidinol-phosphate aminotransferase [EC:2.6.1.9]	Meg22_810_Bin_217_scaffold_45428_1	Meg19_1012_Bin_198_scaffold_13698_4	GCA_002127415_scaffold_274_2,GCA_002127415_scaffold_316_26	Ga0186947_scaffold_1043_3			Meg22_46_Bin_23_scaffold_33804_3	Meg19_1012_Bin_459_scaffold_311_30		M8-62_Bin_262_scaffold_421749_2	GCA_003599535_scaffold_77_11	GCA_005223185_scaffold_4_156	Meg22_46_Bin_11_scaffold_12757_6	Meg19_1012_Bin_119_scaffold_9303_9	Meg19_46_Bin_239_scaffold_11918_3		Meg19_46_Bin_60_scaffold_25322_13		Meg22_46_Bin_213_scaffold_103426_2	M3-38_Bin_215_scaffold_56680_6	M8-62_Bin_157_scaffold_26887_4,M8-62_Bin_157_scaffold_84323_2				BHB10-2_Bin_362_scaffold_63103_5	M3-10_Bin_262_scaffold_82342_3	M3-22_Bin_282_scaffold_71297_5	M3-44_Bin_119_scaffold_6996_14		LQ108M_Bin_12_scaffold_444_6									M3-30_Bin_374_scaffold_1506_21
		GOT1	K14454	aspartate aminotransferase, cytoplasmic [EC:2.6.1.1]
		GOT2	K14455	aspartate aminotransferase, mitochondrial [EC:2.6.1.1]
		ASPS	K00811	aspartate aminotransferase, chloroplastic [EC:2.6.1.1]
		aspB	K00812	aspartate aminotransferase [EC:2.6.1.1]		Meg19_1012_Bin_198_scaffold_16588_5	GCA_002127415_scaffold_18_6		Ga0170695_scaffold_1043_1	Meg22_1416_Bin_86_scaffold_50890_4	Meg22_46_Bin_23_scaffold_73503_4,Meg22_46_Bin_23_scaffold_59435_2	Meg19_1012_Bin_459_scaffold_284_80,Meg19_1012_Bin_459_scaffold_187_39,Meg19_1012_Bin_459_scaffold_284_78		M8-62_Bin_262_scaffold_162699_1	GCA_003599535_scaffold_43_5	GCA_005223185_scaffold_9_55,GCA_005223185_scaffold_1_178,GCA_005223185_scaffold_9_53	Meg22_46_Bin_11_scaffold_47142_3	Meg19_1012_Bin_119_scaffold_113399_5,Meg19_1012_Bin_119_scaffold_10543_12	Meg19_46_Bin_239_scaffold_35656_3	Meg22_02_Bin_84_scaffold_17966_8		Meg22_24_Bin_124_scaffold_7728_8	Meg22_46_Bin_213_scaffold_14209_8	M3-38_Bin_215_scaffold_133224_4	M8-62_Bin_157_scaffold_17367_9	M8-62_Bin_326_scaffold_44057_7	SY70-4-11_Bin_40_scaffold_5896_8		BHB10-2_Bin_362_scaffold_12609_12,BHB10-2_Bin_362_scaffold_30408_7	M3-10_Bin_262_scaffold_48040_6	M3-22_Bin_282_scaffold_7891_7	M3-44_Bin_119_scaffold_1092_3,M3-44_Bin_119_scaffold_7260_3		LQ108M_Bin_12_scaffold_12_461,LQ108M_Bin_12_scaffold_75_115	Meg22_46_Bin_210_scaffold_22507_2,Meg22_46_Bin_210_scaffold_174048_2	Meg22_1012_Bin_348_scaffold_101201_3,Meg22_1012_Bin_348_scaffold_36844_2	Meg22_1214_Bin_176_scaffold_15159_9,Meg22_1214_Bin_176_scaffold_4537_12,Meg22_1214_Bin_176_scaffold_63743_3	Meg22_1214_Bin_137_scaffold_59065_6	Meg22_46_Bin_89_scaffold_2524_12,Meg22_46_Bin_89_scaffold_4972_8	Meg22_24_Bin_129_scaffold_1414_4,Meg22_24_Bin_129_scaffold_16915_3	BHB10-38_Bin_186_scaffold_28004_9,BHB10-38_Bin_186_scaffold_97245_6	BHB10-38_Bin_9_scaffold_15739_12,BHB10-38_Bin_9_scaffold_251657_3	M3-30_Bin_374_scaffold_7041_11,M3-30_Bin_374_scaffold_8642_1	SY70-4-3_Bin_44_scaffold_30500_4	SY70-4-3_Bin_59_scaffold_17956_3		ex4484_8_scaffold_565_14
		aspC	K00813	aspartate aminotransferase [EC:2.6.1.1]
		yhdR	K11358	aspartate aminotransferase [EC:2.6.1.1]																									BHB10-2_Bin_362_scaffold_140854_3					LQ108M_Bin_12_scaffold_2945_28
		PAT, AAT	K15849	bifunctional aspartate aminotransferase and glutamate/aspartate-prephenate aminotransferase [EC:2.6.1.1 2.6.1.78 2.6.1.79]
	4-Hydroxyphenylpyruvate => Homogentisate	HPD, hppD	K00457	4-hydroxyphenylpyruvate dioxygenase [EC:1.13.11.27]																													GCA_003820615_scaffold_345_1,GCA_003820615_scaffold_92_3
	Homogentisate => 4-Maleylacetoacetate	HGD, hmgA	K00451	homogentisate 1,2-dioxygenase [EC:1.13.11.5]																													GCA_003820615_scaffold_345_2
	4-Maleylacetoacetate => 4-Fumarylacetoacetate	maiA, GSTZ1	K01800	maleylacetoacetate isomerase [EC:5.2.1.2]
	4-Fumarylacetoacetate => Acetoacetate + Fumarate	FAH, fahA	K01555	fumarylacetoacetase [EC:3.7.1.2]
		faaH	K16171	fumarylacetoacetate (FAA) hydrolase [EC:3.7.1.2]
	L-Leucine => 4-Methyl-2-oxopentanoate	E2.6.1.42, ilvE	K00826	branched-chain amino acid aminotransferase [EC:2.6.1.42]	Meg22_810_Bin_217_scaffold_18020_4	Meg19_1012_Bin_198_scaffold_14744_8	GCA_002127415_scaffold_293_2	Ga0186947_scaffold_1001_55	Ga0170695_scaffold_1013_22			Meg19_1012_Bin_459_scaffold_537_50	M3-44_Bin_198_scaffold_312926_3	M8-62_Bin_262_scaffold_13149_10	GCA_003599535_scaffold_115_11	GCA_005223185_scaffold_12_68	Meg22_46_Bin_11_scaffold_37424_6	Meg19_1012_Bin_119_scaffold_15639_8	Meg19_46_Bin_239_scaffold_121403_2	Meg22_02_Bin_84_scaffold_19505_3	Meg19_46_Bin_60_scaffold_64206_1	Meg22_24_Bin_124_scaffold_101197_1,Meg22_24_Bin_124_scaffold_106361_1	Meg22_46_Bin_213_scaffold_43923_3				SY70-4-11_Bin_40_scaffold_10368_4,SY70-4-11_Bin_40_scaffold_9453_6		BHB10-2_Bin_362_scaffold_203290_3,BHB10-2_Bin_362_scaffold_90202_3	M3-10_Bin_262_scaffold_6374_12	M3-22_Bin_282_scaffold_14569_5,M3-22_Bin_282_scaffold_17748_6,M3-22_Bin_282_scaffold_19200_12	M3-44_Bin_119_scaffold_1742_23,M3-44_Bin_119_scaffold_3356_31	GCA_003820615_scaffold_559_5	LQ108M_Bin_12_scaffold_29_201	Meg22_46_Bin_210_scaffold_51681_3			Meg22_1214_Bin_137_scaffold_7027_9	Meg22_46_Bin_89_scaffold_84785_2	Meg22_24_Bin_129_scaffold_22588_4	BHB10-38_Bin_186_scaffold_383462_2		M3-30_Bin_374_scaffold_1691_4		SY70-4-3_Bin_59_scaffold_88247_2				Meg22_46_Bin_45_scaffold_62026_2
		E1.4.1.9	K00263	leucine dehydrogenase [EC:1.4.1.9]									M3-44_Bin_198_scaffold_385160_3												M8-62_Bin_157_scaffold_84150_5	M8-62_Bin_326_scaffold_44694_2		AB_03_Bin_160_scaffold_59393_1								Meg22_1012_Bin_348_scaffold_65717_1	Meg22_1214_Bin_176_scaffold_1271_27	Meg22_1214_Bin_137_scaffold_21998_10,Meg22_1214_Bin_137_scaffold_6127_17	Meg22_46_Bin_89_scaffold_101396_2,Meg22_46_Bin_89_scaffold_1420_9	Meg22_24_Bin_129_scaffold_1680_2,Meg22_24_Bin_129_scaffold_28510_2		BHB10-38_Bin_9_scaffold_53067_3	M3-30_Bin_374_scaffold_1320_5,M3-30_Bin_374_scaffold_1585_29	SY70-4-3_Bin_44_scaffold_164048_6	SY70-4-3_Bin_59_scaffold_9429_6	Meg19_02_Bin_5_scaffold_190459_1	ex4484_8_scaffold_879_9	Meg19_46_Bin_228_scaffold_16414_7	Meg22_46_Bin_45_scaffold_22188_3,Meg22_46_Bin_45_scaffold_140957_2
	L-Valine => 3-Methyl-2-oxobutanoic acid	E2.6.1.42, ilvE	K00826	branched-chain amino acid aminotransferase [EC:2.6.1.42]	Meg22_810_Bin_217_scaffold_18020_4	Meg19_1012_Bin_198_scaffold_14744_8	GCA_002127415_scaffold_293_2	Ga0186947_scaffold_1001_55	Ga0170695_scaffold_1013_22			Meg19_1012_Bin_459_scaffold_537_50	M3-44_Bin_198_scaffold_312926_3	M8-62_Bin_262_scaffold_13149_10	GCA_003599535_scaffold_115_11	GCA_005223185_scaffold_12_68	Meg22_46_Bin_11_scaffold_37424_6	Meg19_1012_Bin_119_scaffold_15639_8	Meg19_46_Bin_239_scaffold_121403_2	Meg22_02_Bin_84_scaffold_19505_3	Meg19_46_Bin_60_scaffold_64206_1	Meg22_24_Bin_124_scaffold_101197_1,Meg22_24_Bin_124_scaffold_106361_1	Meg22_46_Bin_213_scaffold_43923_3				SY70-4-11_Bin_40_scaffold_10368_4,SY70-4-11_Bin_40_scaffold_9453_6		BHB10-2_Bin_362_scaffold_203290_3,BHB10-2_Bin_362_scaffold_90202_3	M3-10_Bin_262_scaffold_6374_12	M3-22_Bin_282_scaffold_14569_5,M3-22_Bin_282_scaffold_17748_6,M3-22_Bin_282_scaffold_19200_12	M3-44_Bin_119_scaffold_1742_23,M3-44_Bin_119_scaffold_3356_31	GCA_003820615_scaffold_559_5	LQ108M_Bin_12_scaffold_29_201	Meg22_46_Bin_210_scaffold_51681_3			Meg22_1214_Bin_137_scaffold_7027_9	Meg22_46_Bin_89_scaffold_84785_2	Meg22_24_Bin_129_scaffold_22588_4	BHB10-38_Bin_186_scaffold_383462_2		M3-30_Bin_374_scaffold_1691_4		SY70-4-3_Bin_59_scaffold_88247_2				Meg22_46_Bin_45_scaffold_62026_2
		vdh	K00271	valine dehydrogenase (NAD+) [EC:1.4.1.23]
	L-Isoleucine => (S)-3-Methyl-2-oxopentanoate	E2.6.1.42, ilvE	K00826	branched-chain amino acid aminotransferase [EC:2.6.1.42]	Meg22_810_Bin_217_scaffold_18020_4	Meg19_1012_Bin_198_scaffold_14744_8	GCA_002127415_scaffold_293_2	Ga0186947_scaffold_1001_55	Ga0170695_scaffold_1013_22			Meg19_1012_Bin_459_scaffold_537_50	M3-44_Bin_198_scaffold_312926_3	M8-62_Bin_262_scaffold_13149_10	GCA_003599535_scaffold_115_11	GCA_005223185_scaffold_12_68	Meg22_46_Bin_11_scaffold_37424_6	Meg19_1012_Bin_119_scaffold_15639_8	Meg19_46_Bin_239_scaffold_121403_2	Meg22_02_Bin_84_scaffold_19505_3	Meg19_46_Bin_60_scaffold_64206_1	Meg22_24_Bin_124_scaffold_101197_1,Meg22_24_Bin_124_scaffold_106361_1	Meg22_46_Bin_213_scaffold_43923_3				SY70-4-11_Bin_40_scaffold_10368_4,SY70-4-11_Bin_40_scaffold_9453_6		BHB10-2_Bin_362_scaffold_203290_3,BHB10-2_Bin_362_scaffold_90202_3	M3-10_Bin_262_scaffold_6374_12	M3-22_Bin_282_scaffold_14569_5,M3-22_Bin_282_scaffold_17748_6,M3-22_Bin_282_scaffold_19200_12	M3-44_Bin_119_scaffold_1742_23,M3-44_Bin_119_scaffold_3356_31	GCA_003820615_scaffold_559_5	LQ108M_Bin_12_scaffold_29_201	Meg22_46_Bin_210_scaffold_51681_3			Meg22_1214_Bin_137_scaffold_7027_9	Meg22_46_Bin_89_scaffold_84785_2	Meg22_24_Bin_129_scaffold_22588_4	BHB10-38_Bin_186_scaffold_383462_2		M3-30_Bin_374_scaffold_1691_4		SY70-4-3_Bin_59_scaffold_88247_2				Meg22_46_Bin_45_scaffold_62026_2
		IL4T1	K03334	L-amino-acid oxidase [EC:1.4.3.2]
	(S)-3-Methyl-2-oxopentanoate => (S)-2-Methylbutanoyl-CoA	vorA	K00186	2-oxoisovalerate ferredoxin oxidoreductase alpha subunit [EC:1.2.7.7]
		vorB	K00187	2-oxoisovalerate ferredoxin oxidoreductase beta subunit [EC:1.2.7.7]														Meg19_1012_Bin_119_scaffold_12288_19	Meg19_46_Bin_239_scaffold_90484_2						M8-62_Bin_157_scaffold_100156_1	M8-62_Bin_326_scaffold_246466_2	SY70-4-11_Bin_40_scaffold_87366_1					M3-44_Bin_119_scaffold_822_7	GCA_003820615_scaffold_329_2	LQ108M_Bin_12_scaffold_75_144	Meg22_46_Bin_210_scaffold_123995_2
		vorG, porG	K00189	2-oxoisovalerate/pyruvate ferredoxin oxidoreductase gamma subunit [EC:1.2.7.7 1.2.7.1]
		vorD	K00188	2-oxoisovalerate ferredoxin oxidoreductase delta subunit [EC:1.2.7.7]
	Complex 2	DBT, bkdB	K09699	2-oxoisovalerate dehydrogenase E2 component (dihydrolipoyl transacylase) [EC:2.3.1.168]
	Complex 3	DLD, lpd, pdhD	K00382	dihydrolipoamide dehydrogenase [EC:1.8.1.4]		Meg19_1012_Bin_198_scaffold_242_53,Meg19_1012_Bin_198_scaffold_9858_7	GCA_002127415_scaffold_357_3	Ga0186947_scaffold_1044_6	Ga0170695_scaffold_1004_21		Meg22_46_Bin_23_scaffold_265305_1	Meg19_1012_Bin_459_scaffold_2527_9,Meg19_1012_Bin_459_scaffold_7079_15		M8-62_Bin_262_scaffold_65955_9	GCA_003599535_scaffold_2_84	GCA_005223185_scaffold_6_27,GCA_005223185_scaffold_7_77	Meg22_46_Bin_11_scaffold_13483_8	Meg19_1012_Bin_119_scaffold_13224_4,Meg19_1012_Bin_119_scaffold_8212_5	Meg19_46_Bin_239_scaffold_120758_3,Meg19_46_Bin_239_scaffold_92487_10		Meg19_46_Bin_60_scaffold_46929_1	Meg22_24_Bin_124_scaffold_177418_2,Meg22_24_Bin_124_scaffold_226376_3			M8-62_Bin_157_scaffold_101509_4,M8-62_Bin_157_scaffold_2843_16		SY70-4-11_Bin_40_scaffold_27664_1		BHB10-2_Bin_362_scaffold_81027_7	M3-10_Bin_262_scaffold_68548_5	M3-22_Bin_282_scaffold_9829_7	M3-44_Bin_119_scaffold_3859_26	GCA_003820615_scaffold_744_2	LQ108M_Bin_12_scaffold_75_121		Meg22_1012_Bin_348_scaffold_72704_5	Meg22_1214_Bin_176_scaffold_25418_12	Meg22_1214_Bin_137_scaffold_20273_12	Meg22_46_Bin_89_scaffold_4642_5	Meg22_24_Bin_129_scaffold_93407_2		BHB10-38_Bin_9_scaffold_128692_3	M3-30_Bin_374_scaffold_1200_5	SY70-4-3_Bin_44_scaffold_36494_2	SY70-4-3_Bin_59_scaffold_40603_2	Meg19_02_Bin_5_scaffold_60918_3		Meg19_46_Bin_228_scaffold_12362_8	Meg22_46_Bin_45_scaffold_230053_1
	Complex 1	BCKDHA, bkdA1	K00166	2-oxoisovalerate dehydrogenase E1 component alpha subunit [EC:1.2.4.4]																					M8-62_Bin_157_scaffold_2843_19
		BCKDHB, bkdA2	K00167	2-oxoisovalerate dehydrogenase E1 component beta subunit [EC:1.2.4.4]										M8-62_Bin_262_scaffold_65955_5											M8-62_Bin_157_scaffold_101509_2,M8-62_Bin_157_scaffold_2843_18				BHB10-2_Bin_362_scaffold_151435_4	M3-10_Bin_262_scaffold_68548_3	M3-22_Bin_282_scaffold_9829_5
		bkdA	K11381	2-oxoisovalerate dehydrogenase E1 component [EC:1.2.4.4]														Meg19_1012_Bin_119_scaffold_8037_13	Meg19_46_Bin_239_scaffold_36689_5		Meg19_46_Bin_60_scaffold_229878_2,Meg19_46_Bin_60_scaffold_67129_5	Meg22_24_Bin_124_scaffold_19524_4	Meg22_46_Bin_213_scaffold_43614_3				SY70-4-11_Bin_40_scaffold_20561_4	AB_03_Bin_160_scaffold_35030_2,AB_03_Bin_160_scaffold_60938_1		M3-10_Bin_262_scaffold_266552_2	M3-22_Bin_282_scaffold_26755_8	M3-44_Bin_119_scaffold_1742_2	GCA_003820615_scaffold_470_2	LQ108M_Bin_12_scaffold_140_31,LQ108M_Bin_12_scaffold_140_76	Meg22_46_Bin_210_scaffold_286871_1
	3-Methylbutanoyl-CoA => 3-Methylcrotonyl-CoA	IVD, ivd	K00253	isovaleryl-CoA dehydrogenase [EC:1.3.8.4]
		ACADM, acd	K00249	acyl-CoA dehydrogenase [EC:1.3.8.7]	Meg22_810_Bin_217_scaffold_18020_5,Meg22_810_Bin_217_scaffold_18020_9	Meg19_1012_Bin_198_scaffold_14744_4,Meg19_1012_Bin_198_scaffold_14744_7,Meg19_1012_Bin_198_scaffold_1620_36,Meg19_1012_Bin_198_scaffold_4988_4	GCA_002127415_scaffold_293_1,GCA_002127415_scaffold_296_5,GCA_002127415_scaffold_345_9,GCA_002127415_scaffold_53_10	Ga0186947_scaffold_1001_50,Ga0186947_scaffold_1001_54,Ga0186947_scaffold_1123_3	Ga0170695_scaffold_1002_15,Ga0170695_scaffold_1013_23		Meg22_46_Bin_23_scaffold_20955_9,Meg22_46_Bin_23_scaffold_243387_1	Meg19_1012_Bin_459_scaffold_263_19,Meg19_1012_Bin_459_scaffold_5327_1,Meg19_1012_Bin_459_scaffold_537_54,Meg19_1012_Bin_459_scaffold_537_58,Meg19_1012_Bin_459_scaffold_6041_13	M3-44_Bin_198_scaffold_114127_2,M3-44_Bin_198_scaffold_217558_4,M3-44_Bin_198_scaffold_259035_4	M8-62_Bin_262_scaffold_13149_4,M8-62_Bin_262_scaffold_13149_8,M8-62_Bin_262_scaffold_196598_3,M8-62_Bin_262_scaffold_41688_14,M8-62_Bin_262_scaffold_77634_2	GCA_003599535_scaffold_10_24,GCA_003599535_scaffold_115_10,GCA_003599535_scaffold_115_6,GCA_003599535_scaffold_116_3	GCA_005223185_scaffold_12_61,GCA_005223185_scaffold_12_65,GCA_005223185_scaffold_17_49,GCA_005223185_scaffold_4_122,GCA_005223185_scaffold_7_393	Meg22_46_Bin_11_scaffold_40431_1,Meg22_46_Bin_11_scaffold_40431_5,Meg22_46_Bin_11_scaffold_50508_2	Meg19_1012_Bin_119_scaffold_1690_11,Meg19_1012_Bin_119_scaffold_1690_7,Meg19_1012_Bin_119_scaffold_6928_9	Meg19_46_Bin_239_scaffold_102561_1,Meg19_46_Bin_239_scaffold_123041_2,Meg19_46_Bin_239_scaffold_24479_5,Meg19_46_Bin_239_scaffold_70128_2	Meg22_02_Bin_84_scaffold_15826_4,Meg22_02_Bin_84_scaffold_75170_3	Meg19_46_Bin_60_scaffold_54044_4,Meg19_46_Bin_60_scaffold_90807_2	Meg22_24_Bin_124_scaffold_3726_5,Meg22_24_Bin_124_scaffold_4524_12,Meg22_24_Bin_124_scaffold_76367_2,Meg22_24_Bin_124_scaffold_76367_6	Meg22_46_Bin_213_scaffold_247780_3,Meg22_46_Bin_213_scaffold_292905_1,Meg22_46_Bin_213_scaffold_4034_18		M8-62_Bin_157_scaffold_19785_12,M8-62_Bin_157_scaffold_19785_8,M8-62_Bin_157_scaffold_20642_12	M8-62_Bin_326_scaffold_134871_1	SY70-4-11_Bin_40_scaffold_31703_2,SY70-4-11_Bin_40_scaffold_5896_5	AB_03_Bin_160_scaffold_3714_13,AB_03_Bin_160_scaffold_42987_6,AB_03_Bin_160_scaffold_52838_3	BHB10-2_Bin_362_scaffold_117787_3,BHB10-2_Bin_362_scaffold_18493_15,BHB10-2_Bin_362_scaffold_19438_3	M3-10_Bin_262_scaffold_287395_2,M3-10_Bin_262_scaffold_144989_4,M3-10_Bin_262_scaffold_64816_7,M3-10_Bin_262_scaffold_98562_1	M3-22_Bin_282_scaffold_1801_10,M3-22_Bin_282_scaffold_198392_2,M3-22_Bin_282_scaffold_35267_5,M3-22_Bin_282_scaffold_8062_9,M3-22_Bin_282_scaffold_95298_3	M3-44_Bin_119_scaffold_11043_13,M3-44_Bin_119_scaffold_2863_22,M3-44_Bin_119_scaffold_6536_29,M3-44_Bin_119_scaffold_6996_7,M3-44_Bin_119_scaffold_822_31	GCA_003820615_scaffold_132_1,GCA_003820615_scaffold_817_5	LQ108M_Bin_12_scaffold_17_187,LQ108M_Bin_12_scaffold_29_217,LQ108M_Bin_12_scaffold_2_465,LQ108M_Bin_12_scaffold_89_122	Meg22_46_Bin_210_scaffold_189758_3,Meg22_46_Bin_210_scaffold_91096_3	Meg22_1012_Bin_348_scaffold_33240_3,Meg22_1012_Bin_348_scaffold_40014_3,Meg22_1012_Bin_348_scaffold_9364_10	Meg22_1214_Bin_176_scaffold_3507_4,Meg22_1214_Bin_176_scaffold_35885_9,Meg22_1214_Bin_176_scaffold_40078_6	Meg22_1214_Bin_137_scaffold_6127_26,Meg22_1214_Bin_137_scaffold_81492_1,Meg22_1214_Bin_137_scaffold_92420_4	Meg22_46_Bin_89_scaffold_14514_4,Meg22_46_Bin_89_scaffold_23025_6,Meg22_46_Bin_89_scaffold_3387_11	Meg22_24_Bin_129_scaffold_13933_1,Meg22_24_Bin_129_scaffold_953_10	BHB10-38_Bin_186_scaffold_102364_3,BHB10-38_Bin_186_scaffold_69292_11	BHB10-38_Bin_9_scaffold_24503_11,BHB10-38_Bin_9_scaffold_76775_4	M3-30_Bin_374_scaffold_1320_17,M3-30_Bin_374_scaffold_1320_27,M3-30_Bin_374_scaffold_214_37	SY70-4-3_Bin_44_scaffold_73780_3	SY70-4-3_Bin_59_scaffold_119926_2,SY70-4-3_Bin_59_scaffold_15829_4	Meg19_02_Bin_5_scaffold_103434_2,Meg19_02_Bin_5_scaffold_113847_2,Meg19_02_Bin_5_scaffold_178319_2,Meg19_02_Bin_5_scaffold_37995_2	ex4484_8_scaffold_879_6,ex4484_8_scaffold_971_8	Meg19_46_Bin_228_scaffold_33479_3,Meg19_46_Bin_228_scaffold_47558_3,Meg19_46_Bin_228_scaffold_49771_3	Meg22_46_Bin_45_scaffold_140957_5,Meg22_46_Bin_45_scaffold_37336_2
	3-Methylcrotonyl-CoA => 3-Methylglutaconyl-CoA	E6.4.1.4A	K01968	3-methylcrotonyl-CoA carboxylase alpha subunit [EC:6.4.1.4]		Meg19_1012_Bin_198_scaffold_14744_1																									M3-22_Bin_282_scaffold_7234_10
		E6.4.1.4B	K01969	3-methylcrotonyl-CoA carboxylase beta subunit [EC:6.4.1.4]		Meg19_1012_Bin_198_scaffold_2835_42		Ga0186947_scaffold_1001_37	Ga0170695_scaffold_1016_4																			AB_03_Bin_160_scaffold_9903_6	BHB10-2_Bin_362_scaffold_59039_3	M3-10_Bin_262_scaffold_92995_3	M3-22_Bin_282_scaffold_7234_12		GCA_003820615_scaffold_666_1	LQ108M_Bin_12_scaffold_140_124			Meg22_1214_Bin_176_scaffold_79619_3	Meg22_1214_Bin_137_scaffold_106875_3	Meg22_46_Bin_89_scaffold_23233_6	Meg22_24_Bin_129_scaffold_21131_4			M3-30_Bin_374_scaffold_5418_10			Meg19_02_Bin_5_scaffold_35349_2	ex4484_8_scaffold_879_2	Meg19_46_Bin_228_scaffold_124645_1
	3-Methylglutaconyl-CoA => (S)-3-Hydroxy-3-methylglutaryl-CoA	AUH	K05607	methylglutaconyl-CoA hydratase [EC:4.2.1.18]
		liuC	K13766	methylglutaconyl-CoA hydratase [EC:4.2.1.18]		Meg19_1012_Bin_198_scaffold_2835_44	GCA_002127415_scaffold_345_2	Ga0186947_scaffold_1001_38	Ga0170695_scaffold_1016_3																			AB_03_Bin_160_scaffold_9903_7	BHB10-2_Bin_362_scaffold_59039_2	M3-10_Bin_262_scaffold_92995_2	M3-22_Bin_282_scaffold_7234_11	M3-44_Bin_119_scaffold_4891_34	GCA_003820615_scaffold_97_2	LQ108M_Bin_12_scaffold_140_123	Meg22_46_Bin_210_scaffold_115641_4	Meg22_1012_Bin_348_scaffold_42958_7	Meg22_1214_Bin_176_scaffold_13089_5		Meg22_46_Bin_89_scaffold_23233_12	Meg22_24_Bin_129_scaffold_55078_3	BHB10-38_Bin_186_scaffold_25401_8		M3-30_Bin_374_scaffold_1200_28	SY70-4-3_Bin_44_scaffold_35950_1	SY70-4-3_Bin_59_scaffold_73279_3		ex4484_8_scaffold_879_3		Meg22_46_Bin_45_scaffold_122773_2
	(S)-3-hydroxy-3-methylglutaryl-CoA = acetyl-CoA + acetoacetate	HMGCL, hmgL	K01640	hydroxymethylglutaryl-CoA lyase [EC:4.1.3.4]																								AB_03_Bin_160_scaffold_63844_4	BHB10-2_Bin_362_scaffold_260155_5	M3-10_Bin_262_scaffold_26960_6	M3-22_Bin_282_scaffold_7234_8		GCA_003820615_scaffold_314_3	LQ108M_Bin_12_scaffold_140_120
Pyruvate Metabolism	Pyruvate Dehydrogenase Complex	aceE	K00163	pyruvate dehydrogenase E1 component [EC:1.2.4.1]																										M3-10_Bin_262_scaffold_21262_8	M3-22_Bin_282_scaffold_169190_3	M3-44_Bin_119_scaffold_1301_50	GCA_003820615_scaffold_379_1	LQ108M_Bin_12_scaffold_12_124
		PDHA, phdA	K00161	pyruvate dehydrogenase E1 component alpha subunit [EC:1.2.4.1]	Meg22_810_Bin_217_scaffold_216233_1		GCA_002127415_scaffold_199_6	Ga0186947_scaffold_1044_3			Meg22_46_Bin_23_scaffold_267246_1	Meg19_1012_Bin_459_scaffold_531_3	M3-44_Bin_198_scaffold_32503_3			GCA_005223185_scaffold_7_74		Meg19_1012_Bin_119_scaffold_8037_13	Meg19_46_Bin_239_scaffold_36689_5,Meg19_46_Bin_239_scaffold_92487_6		Meg19_46_Bin_60_scaffold_229878_2	Meg22_24_Bin_124_scaffold_54762_8,Meg22_24_Bin_124_scaffold_19524_4	Meg22_46_Bin_213_scaffold_43614_3		M8-62_Bin_157_scaffold_2843_19		SY70-4-11_Bin_40_scaffold_20561_4				M3-22_Bin_282_scaffold_45671_3				Meg22_46_Bin_210_scaffold_163282_4
		PDHB, pdhB	K00162	pyruvate dehydrogenase E1 component beta subunit [EC:1.2.4.1]				Ga0186947_scaffold_1044_4			Meg22_46_Bin_23_scaffold_267246_2	Meg19_1012_Bin_459_scaffold_531_2	M3-44_Bin_198_scaffold_32503_2	M8-62_Bin_262_scaffold_356985_1		GCA_005223185_scaffold_7_75		Meg19_1012_Bin_119_scaffold_8212_3,Meg19_1012_Bin_119_scaffold_8037_13	Meg19_46_Bin_239_scaffold_36689_5		Meg19_46_Bin_60_scaffold_67129_5	Meg22_24_Bin_124_scaffold_19524_4	Meg22_46_Bin_213_scaffold_43614_3				SY70-4-11_Bin_40_scaffold_20561_4					M3-44_Bin_119_scaffold_3859_24
		DLAT, aceF, pdhC	K00627	pyruvate dehydrogenase E2 component (dihydrolipoamide acetyltransferase) [EC:2.3.1.12]				Ga0186947_scaffold_1044_5				Meg19_1012_Bin_459_scaffold_531_1				GCA_005223185_scaffold_7_76		Meg19_1012_Bin_119_scaffold_8037_14,Meg19_1012_Bin_119_scaffold_8212_4	Meg19_46_Bin_239_scaffold_36689_4		Meg19_46_Bin_60_scaffold_67129_4	Meg22_24_Bin_124_scaffold_19524_5	Meg22_46_Bin_213_scaffold_43614_2		M8-62_Bin_157_scaffold_101509_3,M8-62_Bin_157_scaffold_2843_17		SY70-4-11_Bin_40_scaffold_20561_5
		DLD, lpd, pdhD	K00382	dihydrolipoamide dehydrogenase [EC:1.8.1.4]		Meg19_1012_Bin_198_scaffold_242_53,Meg19_1012_Bin_198_scaffold_9858_7	GCA_002127415_scaffold_357_3	Ga0186947_scaffold_1044_6	Ga0170695_scaffold_1004_21		Meg22_46_Bin_23_scaffold_265305_1	Meg19_1012_Bin_459_scaffold_2527_9,Meg19_1012_Bin_459_scaffold_7079_15		M8-62_Bin_262_scaffold_65955_9	GCA_003599535_scaffold_2_84	GCA_005223185_scaffold_6_27,GCA_005223185_scaffold_7_77	Meg22_46_Bin_11_scaffold_13483_8	Meg19_1012_Bin_119_scaffold_13224_4,Meg19_1012_Bin_119_scaffold_8212_5	Meg19_46_Bin_239_scaffold_120758_3,Meg19_46_Bin_239_scaffold_92487_10		Meg19_46_Bin_60_scaffold_46929_1	Meg22_24_Bin_124_scaffold_177418_2,Meg22_24_Bin_124_scaffold_226376_3			M8-62_Bin_157_scaffold_101509_4,M8-62_Bin_157_scaffold_2843_16		SY70-4-11_Bin_40_scaffold_27664_1		BHB10-2_Bin_362_scaffold_81027_7	M3-10_Bin_262_scaffold_68548_5	M3-22_Bin_282_scaffold_9829_7	M3-44_Bin_119_scaffold_3859_26	GCA_003820615_scaffold_744_2	LQ108M_Bin_12_scaffold_75_121		Meg22_1012_Bin_348_scaffold_72704_5	Meg22_1214_Bin_176_scaffold_25418_12	Meg22_1214_Bin_137_scaffold_20273_12	Meg22_46_Bin_89_scaffold_4642_5	Meg22_24_Bin_129_scaffold_93407_2		BHB10-38_Bin_9_scaffold_128692_3	M3-30_Bin_374_scaffold_1200_5	SY70-4-3_Bin_44_scaffold_36494_2	SY70-4-3_Bin_59_scaffold_40603_2	Meg19_02_Bin_5_scaffold_60918_3		Meg19_46_Bin_228_scaffold_12362_8	Meg22_46_Bin_45_scaffold_230053_1
	pyruvate formate-lyase	E2.3.1.54, pflD	K00656	formate C-acetyltransferase [EC:2.3.1.54]																																						BHB10-38_Bin_9_scaffold_46318_7				Meg19_02_Bin_5_scaffold_408322_1
	2-oxoglutarate/2-oxoacid ferredoxin oxidoreductase	korA, oorA, oforA	K00174	2-oxoglutarate/2-oxoacid ferredoxin oxidoreductase subunit alpha [EC:1.2.7.3 1.2.7.11]	Meg22_810_Bin_217_scaffold_108885_1,Meg22_810_Bin_217_scaffold_61192_5	Meg19_1012_Bin_198_scaffold_1620_39,Meg19_1012_Bin_198_scaffold_8718_5	GCA_002127415_scaffold_353_7,GCA_002127415_scaffold_53_7	Ga0186947_scaffold_1001_85		Meg22_1416_Bin_86_scaffold_76829_2,Meg22_1416_Bin_86_scaffold_81056_5	Meg22_46_Bin_23_scaffold_206149_4,Meg22_46_Bin_23_scaffold_61638_4	Meg19_1012_Bin_459_scaffold_311_14,Meg19_1012_Bin_459_scaffold_5327_19		M8-62_Bin_262_scaffold_19257_8,M8-62_Bin_262_scaffold_69755_7	GCA_003599535_scaffold_10_7	GCA_005223185_scaffold_4_107,GCA_005223185_scaffold_7_408	Meg22_46_Bin_11_scaffold_211830_3,Meg22_46_Bin_11_scaffold_220031_1	Meg19_1012_Bin_119_scaffold_12288_20,Meg19_1012_Bin_119_scaffold_15227_4,Meg19_1012_Bin_119_scaffold_4196_21,Meg19_1012_Bin_119_scaffold_6736_14	Meg19_46_Bin_239_scaffold_33496_3,Meg19_46_Bin_239_scaffold_90484_3	Meg22_02_Bin_84_scaffold_168544_2,Meg22_02_Bin_84_scaffold_198526_4,Meg22_02_Bin_84_scaffold_83941_2	Meg19_46_Bin_60_scaffold_105872_4,Meg19_46_Bin_60_scaffold_33289_3,Meg19_46_Bin_60_scaffold_8558_3	Meg22_24_Bin_124_scaffold_64627_4,Meg22_24_Bin_124_scaffold_9078_2	Meg22_46_Bin_213_scaffold_16344_8	M3-38_Bin_215_scaffold_101020_7,M3-38_Bin_215_scaffold_160603_5,M3-38_Bin_215_scaffold_185581_2,M3-38_Bin_215_scaffold_406340_3	M8-62_Bin_157_scaffold_145334_1,M8-62_Bin_157_scaffold_14724_9,M8-62_Bin_157_scaffold_18940_3,M8-62_Bin_157_scaffold_20527_11	M8-62_Bin_326_scaffold_155453_3,M8-62_Bin_326_scaffold_211431_5,M8-62_Bin_326_scaffold_316419_2,M8-62_Bin_326_scaffold_70105_3	SY70-4-11_Bin_40_scaffold_10799_11,SY70-4-11_Bin_40_scaffold_82115_1	AB_03_Bin_160_scaffold_10083_10,AB_03_Bin_160_scaffold_6058_4,AB_03_Bin_160_scaffold_75735_2	BHB10-2_Bin_362_scaffold_12609_19,BHB10-2_Bin_362_scaffold_357628_2,BHB10-2_Bin_362_scaffold_85424_5	M3-10_Bin_262_scaffold_50235_3	M3-22_Bin_282_scaffold_47347_5	M3-44_Bin_119_scaffold_822_6,M3-44_Bin_119_scaffold_3079_49,M3-44_Bin_119_scaffold_40472_2	GCA_003820615_scaffold_494_3,GCA_003820615_scaffold_682_3	LQ108M_Bin_12_scaffold_12_114,LQ108M_Bin_12_scaffold_17_53	Meg22_46_Bin_210_scaffold_123995_1,Meg22_46_Bin_210_scaffold_50305_1,Meg22_46_Bin_210_scaffold_86907_1	Meg22_1012_Bin_348_scaffold_101479_2,Meg22_1012_Bin_348_scaffold_42958_5,Meg22_1012_Bin_348_scaffold_58834_3	Meg22_1214_Bin_176_scaffold_13089_3,Meg22_1214_Bin_176_scaffold_25418_4,Meg22_1214_Bin_176_scaffold_3507_11	Meg22_1214_Bin_137_scaffold_20273_3,Meg22_1214_Bin_137_scaffold_95843_4	Meg22_46_Bin_89_scaffold_128851_5,Meg22_46_Bin_89_scaffold_23233_10,Meg22_46_Bin_89_scaffold_4642_14,Meg22_46_Bin_89_scaffold_9959_12	Meg22_24_Bin_129_scaffold_173866_1,Meg22_24_Bin_129_scaffold_5421_8,Meg22_24_Bin_129_scaffold_55078_1,Meg22_24_Bin_129_scaffold_8661_5	BHB10-38_Bin_186_scaffold_123648_5,BHB10-38_Bin_186_scaffold_25401_10	BHB10-38_Bin_9_scaffold_273932_2,BHB10-38_Bin_9_scaffold_308987_2,BHB10-38_Bin_9_scaffold_41635_4,BHB10-38_Bin_9_scaffold_44076_5,BHB10-38_Bin_9_scaffold_63548_6	M3-30_Bin_374_scaffold_1200_30,M3-30_Bin_374_scaffold_177905_3,M3-30_Bin_374_scaffold_18230_11,M3-30_Bin_374_scaffold_24987_10,M3-30_Bin_374_scaffold_24987_6,M3-30_Bin_374_scaffold_471_57	SY70-4-3_Bin_44_scaffold_5128_4	SY70-4-3_Bin_59_scaffold_72507_2,SY70-4-3_Bin_59_scaffold_89033_2	Meg19_02_Bin_5_scaffold_117969_4	ex4484_8_scaffold_2768_12,ex4484_8_scaffold_8976_9	Meg19_46_Bin_228_scaffold_249185_1,Meg19_46_Bin_228_scaffold_151294_4,Meg19_46_Bin_228_scaffold_31990_4,Meg19_46_Bin_228_scaffold_85097_1	Meg22_46_Bin_45_scaffold_6282_11,Meg22_46_Bin_45_scaffold_66941_4,Meg22_46_Bin_45_scaffold_76902_2,Meg22_46_Bin_45_scaffold_999_9
		korB, oorB, oforB	K00175	2-oxoglutarate/2-oxoacid ferredoxin oxidoreductase subunit beta [EC:1.2.7.3 1.2.7.11]	Meg22_810_Bin_217_scaffold_61192_4	Meg19_1012_Bin_198_scaffold_1620_38,Meg19_1012_Bin_198_scaffold_8718_4	GCA_002127415_scaffold_353_6,GCA_002127415_scaffold_53_8	Ga0186947_scaffold_1001_86		Meg22_1416_Bin_86_scaffold_76829_3,Meg22_1416_Bin_86_scaffold_81056_4	Meg22_46_Bin_23_scaffold_61638_5	Meg19_1012_Bin_459_scaffold_311_13,Meg19_1012_Bin_459_scaffold_5327_18	M3-44_Bin_198_scaffold_291547_2,M3-44_Bin_198_scaffold_334835_3	M8-62_Bin_262_scaffold_103744_1,M8-62_Bin_262_scaffold_19257_5	GCA_003599535_scaffold_10_8	GCA_005223185_scaffold_4_106,GCA_005223185_scaffold_7_407	Meg22_46_Bin_11_scaffold_251848_1	Meg19_1012_Bin_119_scaffold_12288_19,Meg19_1012_Bin_119_scaffold_15227_3,Meg19_1012_Bin_119_scaffold_4196_20,Meg19_1012_Bin_119_scaffold_6736_13	Meg19_46_Bin_239_scaffold_149168_1,Meg19_46_Bin_239_scaffold_33496_2,Meg19_46_Bin_239_scaffold_90484_2	Meg22_02_Bin_84_scaffold_168544_3,Meg22_02_Bin_84_scaffold_83941_1	Meg19_46_Bin_60_scaffold_105872_5,Meg19_46_Bin_60_scaffold_190460_2,Meg19_46_Bin_60_scaffold_33289_4,Meg19_46_Bin_60_scaffold_8558_4	Meg22_24_Bin_124_scaffold_37721_2,Meg22_24_Bin_124_scaffold_64627_3,Meg22_24_Bin_124_scaffold_9078_3	Meg22_46_Bin_213_scaffold_16344_9,Meg22_46_Bin_213_scaffold_54099_5	M3-38_Bin_215_scaffold_160603_6,M3-38_Bin_215_scaffold_404004_2,M3-38_Bin_215_scaffold_406340_4	M8-62_Bin_157_scaffold_100156_1,M8-62_Bin_157_scaffold_14724_8,M8-62_Bin_157_scaffold_17371_2,M8-62_Bin_157_scaffold_18940_2,M8-62_Bin_157_scaffold_20527_9	M8-62_Bin_326_scaffold_155453_2,M8-62_Bin_326_scaffold_211431_6,M8-62_Bin_326_scaffold_246466_2,M8-62_Bin_326_scaffold_261833_2,M8-62_Bin_326_scaffold_70105_2	SY70-4-11_Bin_40_scaffold_10799_12,SY70-4-11_Bin_40_scaffold_87366_1	AB_03_Bin_160_scaffold_34572_1,AB_03_Bin_160_scaffold_6058_5	BHB10-2_Bin_362_scaffold_12609_18,BHB10-2_Bin_362_scaffold_357628_1,BHB10-2_Bin_362_scaffold_85424_4	M3-10_Bin_262_scaffold_50235_2	M3-22_Bin_282_scaffold_256353_2,M3-22_Bin_282_scaffold_47347_4,M3-22_Bin_282_scaffold_7891_15	M3-44_Bin_119_scaffold_3079_48,M3-44_Bin_119_scaffold_40472_3	GCA_003820615_scaffold_154_3,GCA_003820615_scaffold_329_2,GCA_003820615_scaffold_494_4,GCA_003820615_scaffold_682_4	LQ108M_Bin_12_scaffold_12_113,LQ108M_Bin_12_scaffold_17_52	Meg22_46_Bin_210_scaffold_123995_2,Meg22_46_Bin_210_scaffold_199740_2,Meg22_46_Bin_210_scaffold_50305_2	Meg22_1012_Bin_348_scaffold_101479_3,Meg22_1012_Bin_348_scaffold_42958_4,Meg22_1012_Bin_348_scaffold_58834_4	Meg22_1214_Bin_176_scaffold_13089_2,Meg22_1214_Bin_176_scaffold_25418_3,Meg22_1214_Bin_176_scaffold_3507_12	Meg22_1214_Bin_137_scaffold_95843_3	Meg22_46_Bin_89_scaffold_4642_15,Meg22_46_Bin_89_scaffold_128851_4,Meg22_46_Bin_89_scaffold_23233_9,Meg22_46_Bin_89_scaffold_9959_11	Meg22_24_Bin_129_scaffold_8661_4,Meg22_24_Bin_129_scaffold_21131_7,Meg22_24_Bin_129_scaffold_5421_7	BHB10-38_Bin_186_scaffold_108296_4,BHB10-38_Bin_186_scaffold_123648_4	BHB10-38_Bin_9_scaffold_273932_3,BHB10-38_Bin_9_scaffold_308987_1,BHB10-38_Bin_9_scaffold_41635_3,BHB10-38_Bin_9_scaffold_44076_6,BHB10-38_Bin_9_scaffold_49937_2,BHB10-38_Bin_9_scaffold_63548_12,BHB10-38_Bin_9_scaffold_63548_7	M3-30_Bin_374_scaffold_1200_31,M3-30_Bin_374_scaffold_18230_10,M3-30_Bin_374_scaffold_24987_11,M3-30_Bin_374_scaffold_24987_7,M3-30_Bin_374_scaffold_471_58,M3-30_Bin_374_scaffold_5418_31	SY70-4-3_Bin_44_scaffold_5128_3		Meg19_02_Bin_5_scaffold_117969_3,Meg19_02_Bin_5_scaffold_10650_2,Meg19_02_Bin_5_scaffold_669924_2	ex4484_8_scaffold_2768_11,ex4484_8_scaffold_8976_8	Meg19_46_Bin_228_scaffold_151294_3,Meg19_46_Bin_228_scaffold_193401_2,Meg19_46_Bin_228_scaffold_31990_5,Meg19_46_Bin_228_scaffold_85097_2	Meg22_46_Bin_45_scaffold_999_8,Meg22_46_Bin_45_scaffold_23419_11,Meg22_46_Bin_45_scaffold_6282_10,Meg22_46_Bin_45_scaffold_66941_3
	pyruvate ferredoxin oxidoreductase	porA	K00169	pyruvate ferredoxin oxidoreductase alpha subunit [EC:1.2.7.1]	Meg22_810_Bin_217_scaffold_23701_2,Meg22_810_Bin_217_scaffold_72851_4	Meg19_1012_Bin_198_scaffold_1620_34,Meg19_1012_Bin_198_scaffold_5796_23	GCA_002127415_scaffold_28_12,GCA_002127415_scaffold_360_8	Ga0186947_scaffold_1050_8	Ga0170695_scaffold_1059_8		Meg22_46_Bin_23_scaffold_62470_4	Meg19_1012_Bin_459_scaffold_1158_42,Meg19_1012_Bin_459_scaffold_1613_50	M3-44_Bin_198_scaffold_36501_5	M8-62_Bin_262_scaffold_219930_3,M8-62_Bin_262_scaffold_250050_3	GCA_003599535_scaffold_14_23,GCA_003599535_scaffold_9_1	GCA_005223185_scaffold_4_174,GCA_005223185_scaffold_7_282														M3-10_Bin_262_scaffold_41229_6,M3-10_Bin_262_scaffold_62730_4	M3-22_Bin_282_scaffold_89439_4,M3-22_Bin_282_scaffold_94046_3							Meg22_1214_Bin_137_scaffold_65839_7	Meg22_46_Bin_89_scaffold_7025_8	Meg22_24_Bin_129_scaffold_28504_8	BHB10-38_Bin_186_scaffold_272533_4		M3-30_Bin_374_scaffold_214_67	SY70-4-3_Bin_44_scaffold_22338_3	SY70-4-3_Bin_59_scaffold_12185_7		ex4484_8_scaffold_1097_6,ex4484_8_scaffold_5209_3
		porB	K00170	pyruvate ferredoxin oxidoreductase beta subunit [EC:1.2.7.1]	Meg22_810_Bin_217_scaffold_23701_5	Meg19_1012_Bin_198_scaffold_1620_33,Meg19_1012_Bin_198_scaffold_5796_22	GCA_002127415_scaffold_28_11,GCA_002127415_scaffold_360_7	Ga0186947_scaffold_1050_6	Ga0170695_scaffold_1059_11		Meg22_46_Bin_23_scaffold_53445_2	Meg19_1012_Bin_459_scaffold_1158_41,Meg19_1012_Bin_459_scaffold_1613_49		M8-62_Bin_262_scaffold_219930_4,M8-62_Bin_262_scaffold_250050_2,M8-62_Bin_262_scaffold_358519_3,M8-62_Bin_262_scaffold_440543_2	GCA_003599535_scaffold_14_26,GCA_003599535_scaffold_9_7	GCA_005223185_scaffold_4_173,GCA_005223185_scaffold_7_283						Meg22_24_Bin_124_scaffold_7906_9								M3-10_Bin_262_scaffold_41229_7	M3-22_Bin_282_scaffold_94046_2				Meg22_46_Bin_210_scaffold_275562_3	Meg22_1012_Bin_348_scaffold_138527_3		Meg22_1214_Bin_137_scaffold_205545_3	Meg22_46_Bin_89_scaffold_7025_9		BHB10-38_Bin_186_scaffold_272533_3		M3-30_Bin_374_scaffold_214_68	SY70-4-3_Bin_44_scaffold_22338_2			ex4484_8_scaffold_1097_7,ex4484_8_scaffold_5209_4		Meg22_46_Bin_45_scaffold_103062_1
		porC, porG	K00172	pyruvate ferredoxin oxidoreductase gamma subunit [EC:1.2.7.1]	Meg22_810_Bin_217_scaffold_112047_2	Meg19_1012_Bin_198_scaffold_60620_3	GCA_002127415_scaffold_360_14	Ga0186947_scaffold_1165_2	Ga0170695_scaffold_1059_5	Meg22_1416_Bin_86_scaffold_231116_2	Meg22_46_Bin_23_scaffold_76771_2	Meg19_1012_Bin_459_scaffold_1613_53,Meg19_1012_Bin_459_scaffold_7360_2	M3-44_Bin_198_scaffold_159479_7	M8-62_Bin_262_scaffold_219930_1,M8-62_Bin_262_scaffold_44458_13,M8-62_Bin_262_scaffold_488233_2	GCA_003599535_scaffold_14_21	GCA_005223185_scaffold_4_177,GCA_005223185_scaffold_7_280														M3-10_Bin_262_scaffold_41229_4	M3-22_Bin_282_scaffold_89439_3,M3-22_Bin_282_scaffold_94046_5							Meg22_1214_Bin_137_scaffold_65839_5	Meg22_46_Bin_89_scaffold_7025_6	Meg22_24_Bin_129_scaffold_28504_6			M3-30_Bin_374_scaffold_214_65	SY70-4-3_Bin_44_scaffold_22338_5	SY70-4-3_Bin_59_scaffold_12185_5		ex4484_8_scaffold_1097_4,ex4484_8_scaffold_5209_1
		vorG, porG	K00189	2-oxoisovalerate/pyruvate ferredoxin oxidoreductase gamma subunit [EC:1.2.7.7 1.2.7.1]
		porD	K00171	pyruvate ferredoxin oxidoreductase delta subunit [EC:1.2.7.1]								Meg19_1012_Bin_459_scaffold_1613_52		M8-62_Bin_262_scaffold_219930_2	GCA_003599535_scaffold_14_22	GCA_005223185_scaffold_7_281																						Meg22_1214_Bin_137_scaffold_65839_6	Meg22_46_Bin_89_scaffold_7025_7	Meg22_24_Bin_129_scaffold_28504_7	BHB10-38_Bin_186_scaffold_272533_5		M3-30_Bin_374_scaffold_214_66	SY70-4-3_Bin_44_scaffold_22338_4	SY70-4-3_Bin_59_scaffold_12185_6		ex4484_8_scaffold_1097_5,ex4484_8_scaffold_5209_2
		por, nifJ	K03737	pyruvate-ferredoxin/flavodoxin oxidoreductase [EC:1.2.7.1 1.2.7.-]	Meg22_810_Bin_217_scaffold_128631_3	Meg19_1012_Bin_198_scaffold_242_46	GCA_002127415_scaffold_108_1	Ga0186947_scaffold_1007_22	Ga0170695_scaffold_1041_3									Meg19_1012_Bin_119_scaffold_7505_12	Meg19_46_Bin_239_scaffold_57711_1	Meg22_02_Bin_84_scaffold_206064_1		Meg22_24_Bin_124_scaffold_29906_7	Meg22_46_Bin_213_scaffold_4034_6	M3-38_Bin_215_scaffold_67420_2	M8-62_Bin_157_scaffold_20646_7		SY70-4-11_Bin_40_scaffold_48295_1	AB_03_Bin_160_scaffold_49902_2	BHB10-2_Bin_362_scaffold_62904_5	M3-10_Bin_262_scaffold_100225_2	M3-22_Bin_282_scaffold_67478_2	M3-44_Bin_119_scaffold_822_21	GCA_003820615_scaffold_140_1	LQ108M_Bin_12_scaffold_75_140	Meg22_46_Bin_210_scaffold_72037_1
	Pyruvate carboxylase	PC, pyc	K01958	pyruvate carboxylase [EC:6.4.1.1]
		pycA	K01959	pyruvate carboxylase subunit A [EC:6.4.1.1]				Ga0186947_scaffold_1001_45
		pycB	K01960	pyruvate carboxylase subunit B [EC:6.4.1.1]	Meg22_810_Bin_217_scaffold_46198_3	Meg19_1012_Bin_198_scaffold_7941_8	GCA_002127415_scaffold_345_7			Meg22_1416_Bin_86_scaffold_137126_1							Meg22_46_Bin_11_scaffold_197687_2	Meg19_1012_Bin_119_scaffold_12333_14		Meg22_02_Bin_84_scaffold_36757_3	Meg19_46_Bin_60_scaffold_28755_4	Meg22_24_Bin_124_scaffold_59657_2	Meg22_46_Bin_213_scaffold_8692_16								M3-22_Bin_282_scaffold_1801_30									Meg22_24_Bin_129_scaffold_27395_3,Meg22_24_Bin_129_scaffold_39925_4					SY70-4-3_Bin_59_scaffold_28479_5
	Lactate dehydrogenase	LDH, ldh	K00016	L-lactate dehydrogenase [EC:1.1.1.27]														Meg19_1012_Bin_119_scaffold_3242_15									SY70-4-11_Bin_40_scaffold_26659_5						GCA_003820615_scaffold_139_2					Meg22_1214_Bin_137_scaffold_12994_4
		lldD	K00101	L-lactate dehydrogenase (cytochrome) [EC:1.1.2.3]
		DLD3	K21618	(R)-2-hydroxyglutarate---pyruvate transhydrogenase [EC:1.1.99.40]
		dld	K18930	D-lactate dehydrogenase
		LDHD, dld	K00102	D-lactate dehydrogenase (cytochrome) [EC:1.1.2.4]																																												Meg19_46_Bin_228_scaffold_110852_4	Meg22_46_Bin_45_scaffold_46703_4
		dld	K03777	D-lactate dehydrogenase (quinone) [EC:1.1.5.12]
		dld	K21836	D-lactate dehydrogenase (acceptor) [EC:1.1.99.6]
		ldhA	K03778	D-lactate dehydrogenase [EC:1.1.1.28]
	Pyruvate dehydrogenase	poxB	K00156	pyruvate dehydrogenase (quinone) [EC:1.2.5.1]
	Pyruvate oxidase	E1.2.3.3, poxL	K00158	pyruvate oxidase [EC:1.2.3.3]														Meg19_1012_Bin_119_scaffold_31167_7							M8-62_Bin_157_scaffold_7225_3						M3-22_Bin_282_scaffold_45404_2
	Acetyl-CoA to acetate	E3.1.2.1, ACH1	K01067	acetyl-CoA hydrolase [EC:3.1.2.1]
		pct	K01026	propionate CoA-transferase [EC:2.8.3.1]
		aarC, cat1	K18118	succinyl-CoA:acetate CoA-transferase [EC:2.8.3.18]
	Acetyl-CoA to Acetyl-phosphate	pta	K13788	phosphate acetyltransferase [EC:2.3.1.8]	Meg22_810_Bin_217_scaffold_51275_6	Meg19_1012_Bin_198_scaffold_37934_4	GCA_002127415_scaffold_41_8		Ga0170695_scaffold_1016_22	Meg22_1416_Bin_86_scaffold_80751_2			M3-44_Bin_198_scaffold_96221_2																																				Meg22_46_Bin_45_scaffold_275849_2
		E2.3.1.8, pta	K00625	phosphate acetyltransferase [EC:2.3.1.8]	Meg22_810_Bin_217_scaffold_51275_6	Meg19_1012_Bin_198_scaffold_37934_4	GCA_002127415_scaffold_332_6,GCA_002127415_scaffold_41_8	Ga0186947_scaffold_1059_7		Meg22_1416_Bin_86_scaffold_50890_2		Meg19_1012_Bin_459_scaffold_284_82	M3-44_Bin_198_scaffold_175041_2	M8-62_Bin_262_scaffold_24180_9,M8-62_Bin_262_scaffold_268710_3,M8-62_Bin_262_scaffold_65959_4	GCA_003599535_scaffold_43_8,GCA_003599535_scaffold_77_3	GCA_005223185_scaffold_4_150,GCA_005223185_scaffold_9_57																				Meg22_1012_Bin_348_scaffold_65717_4	Meg22_1214_Bin_176_scaffold_11909_7,Meg22_1214_Bin_176_scaffold_1271_30	Meg22_1214_Bin_137_scaffold_81089_4	Meg22_46_Bin_89_scaffold_17373_4	Meg22_24_Bin_129_scaffold_77487_2		BHB10-38_Bin_9_scaffold_53067_6,BHB10-38_Bin_9_scaffold_61262_4	M3-30_Bin_374_scaffold_1585_32		SY70-4-3_Bin_59_scaffold_7689_4		ex4484_8_scaffold_4979_6,ex4484_8_scaffold_616_9	Meg19_46_Bin_228_scaffold_54282_2,Meg19_46_Bin_228_scaffold_32547_2	Meg22_46_Bin_45_scaffold_31196_5
		K15024	K15024	putative phosphotransacetylase [EC:2.3.1.8]								Meg19_1012_Bin_459_scaffold_120_20		M8-62_Bin_262_scaffold_48356_3		GCA_005223185_scaffold_14_66																				Meg22_1012_Bin_348_scaffold_61432_2	Meg22_1214_Bin_176_scaffold_10988_2	Meg22_1214_Bin_137_scaffold_94973_4	Meg22_46_Bin_89_scaffold_571_37	Meg22_24_Bin_129_scaffold_7194_5		BHB10-38_Bin_9_scaffold_116474_3			SY70-4-3_Bin_59_scaffold_69214_1	Meg19_02_Bin_5_scaffold_258989_2	ex4484_8_scaffold_2859_5,ex4484_8_scaffold_3592_20
		eutD	K04020	phosphotransacetylase
	Acetyl-phosphate to acetate	acyP	K01512	acylphosphatase [EC:3.6.1.7]	Meg22_810_Bin_217_scaffold_167515_4		GCA_002127415_scaffold_50_4		Ga0170695_scaffold_1029_17	Meg22_1416_Bin_86_scaffold_182154_3	Meg22_46_Bin_23_scaffold_144185_3	Meg19_1012_Bin_459_scaffold_563_62	M3-44_Bin_198_scaffold_305961_3	M8-62_Bin_262_scaffold_63986_1	GCA_003599535_scaffold_29_6	GCA_005223185_scaffold_7_43		Meg19_1012_Bin_119_scaffold_4196_27	Meg19_46_Bin_239_scaffold_116197_3	Meg22_02_Bin_84_scaffold_191389_2	Meg19_46_Bin_60_scaffold_46620_3	Meg22_24_Bin_124_scaffold_8294_7	Meg22_46_Bin_213_scaffold_17223_10,Meg22_46_Bin_213_scaffold_283243_2	M3-38_Bin_215_scaffold_250873_1	M8-62_Bin_157_scaffold_18940_11,M8-62_Bin_157_scaffold_37328_7	M8-62_Bin_326_scaffold_49161_5,M8-62_Bin_326_scaffold_55034_1	SY70-4-11_Bin_40_scaffold_32960_4	AB_03_Bin_160_scaffold_48509_2	BHB10-2_Bin_362_scaffold_152329_3		M3-22_Bin_282_scaffold_38380_3	M3-44_Bin_119_scaffold_14131_9	GCA_003820615_scaffold_569_4	LQ108M_Bin_12_scaffold_2_309		Meg22_1012_Bin_348_scaffold_16597_11	Meg22_1214_Bin_176_scaffold_57634_6	Meg22_1214_Bin_137_scaffold_38198_9	Meg22_46_Bin_89_scaffold_1845_37	Meg22_24_Bin_129_scaffold_4772_3	BHB10-38_Bin_186_scaffold_159968_2			SY70-4-3_Bin_44_scaffold_40056_1	SY70-4-3_Bin_59_scaffold_232619_4		ex4484_8_scaffold_1708_11,ex4484_8_scaffold_30323_8		Meg22_46_Bin_45_scaffold_134664_6
		ackA	K00925	acetate kinase [EC:2.7.2.1]		Meg19_1012_Bin_198_scaffold_4645_10	GCA_002127415_scaffold_75_6	Ga0186947_scaffold_1008_20	Ga0170695_scaffold_1060_4	Meg22_1416_Bin_86_scaffold_98488_1		Meg19_1012_Bin_459_scaffold_5327_14		M8-62_Bin_262_scaffold_103744_5	GCA_003599535_scaffold_10_12	GCA_005223185_scaffold_7_403																	GCA_003820615_scaffold_375_1			Meg22_1012_Bin_348_scaffold_26056_6,Meg22_1012_Bin_348_scaffold_43304_3,Meg22_1012_Bin_348_scaffold_51683_3	Meg22_1214_Bin_176_scaffold_25244_1,Meg22_1214_Bin_176_scaffold_5395_28,Meg22_1214_Bin_176_scaffold_64462_1	Meg22_1214_Bin_137_scaffold_156989_2,Meg22_1214_Bin_137_scaffold_86386_3	Meg22_46_Bin_89_scaffold_1009_17,Meg22_46_Bin_89_scaffold_194552_2	Meg22_24_Bin_129_scaffold_2248_4,Meg22_24_Bin_129_scaffold_2257_15	BHB10-38_Bin_186_scaffold_166383_3,BHB10-38_Bin_186_scaffold_176944_3	BHB10-38_Bin_9_scaffold_30961_3		SY70-4-3_Bin_44_scaffold_112993_3,SY70-4-3_Bin_44_scaffold_30475_1,SY70-4-3_Bin_44_scaffold_64459_2	SY70-4-3_Bin_59_scaffold_17775_3,SY70-4-3_Bin_59_scaffold_5520_10		ex4484_8_scaffold_425_23	Meg19_46_Bin_228_scaffold_6158_3	Meg22_46_Bin_45_scaffold_239281_1
	Acetaldehyde dehydrogenase	E1.2.1.10	K00132	acetaldehyde dehydrogenase (acetylating) [EC:1.2.1.10]								Meg19_1012_Bin_459_scaffold_957_25	M3-44_Bin_198_scaffold_53225_3	M8-62_Bin_262_scaffold_126513_3,M8-62_Bin_262_scaffold_59765_6	GCA_003599535_scaffold_70_6	GCA_005223185_scaffold_8_48				Meg22_02_Bin_84_scaffold_178750_2															Meg22_46_Bin_210_scaffold_359780_5
		adhE	K04072	acetaldehyde dehydrogenase / alcohol dehydrogenase [EC:1.2.1.10 1.1.1.1]														Meg19_1012_Bin_119_scaffold_6657_9	Meg19_46_Bin_239_scaffold_36689_2		Meg19_46_Bin_60_scaffold_156867_3	Meg22_24_Bin_124_scaffold_108451_2	Meg22_46_Bin_213_scaffold_110728_2,Meg22_46_Bin_213_scaffold_33117_3						BHB10-2_Bin_362_scaffold_230411_2					LQ108M_Bin_12_scaffold_359_2
		mphF	K04073	acetaldehyde dehydrogenase [EC:1.2.1.10]
		bphJ, xylQ, nahO, tesF	K18366	acetaldehyde/propanal dehydrogenase [EC:1.2.1.10 1.2.1.87]
		eutE	K04021	aldehyde dehydrogenase																								AB_03_Bin_160_scaffold_112153_5	BHB10-2_Bin_362_scaffold_106562_7	M3-10_Bin_262_scaffold_62913_5	M3-22_Bin_282_scaffold_20807_10	M3-44_Bin_119_scaffold_1301_16				Meg22_1012_Bin_348_scaffold_61432_6	Meg22_1214_Bin_176_scaffold_10988_6		Meg22_46_Bin_89_scaffold_571_33	Meg22_24_Bin_129_scaffold_7194_9					SY70-4-3_Bin_59_scaffold_157977_3	Meg19_02_Bin_5_scaffold_326573_1	ex4484_8_scaffold_2859_9
	Pyruvate decarboxylase	PDC, pdc	K01568	pyruvate decarboxylase [EC:4.1.1.1]
	Aldehyde dehydrogenase	ALDH	K00128	aldehyde dehydrogenase (NAD+) [EC:1.2.1.3]							Meg22_46_Bin_23_scaffold_83276_2	Meg19_1012_Bin_459_scaffold_263_121	M3-44_Bin_198_scaffold_91959_3	M8-62_Bin_262_scaffold_20089_11		GCA_005223185_scaffold_16_274								M3-38_Bin_215_scaffold_325106_1	M8-62_Bin_157_scaffold_239875_3		SY70-4-11_Bin_40_scaffold_1461_10	AB_03_Bin_160_scaffold_17567_1			M3-22_Bin_282_scaffold_12375_10	M3-44_Bin_119_scaffold_20111_7,M3-44_Bin_119_scaffold_5235_12		LQ108M_Bin_12_scaffold_12_184														Meg19_46_Bin_228_scaffold_239563_2
		ALDH7A1	K14085	aldehyde dehydrogenase family 7 member A1 [EC:1.2.1.31 1.2.1.8 1.2.1.3]																													GCA_003820615_scaffold_237_9	LQ108M_Bin_12_scaffold_12_733
		ALDH9A1	K00149	aldehyde dehydrogenase family 9 member A1 [EC:1.2.1.47 1.2.1.3]
		aldB	K00138	aldehyde dehydrogenase [EC:1.2.1.-]
		aor	K03738	aldehyde:ferredoxin oxidoreductase [EC:1.2.7.5]						Meg22_1416_Bin_86_scaffold_121852_1				M8-62_Bin_262_scaffold_449803_2				Meg19_1012_Bin_119_scaffold_169097_4	Meg19_46_Bin_239_scaffold_114067_4	Meg22_02_Bin_84_scaffold_171440_1	Meg19_46_Bin_60_scaffold_256484_5	Meg22_24_Bin_124_scaffold_257747_3	Meg22_46_Bin_213_scaffold_470286_2	M3-38_Bin_215_scaffold_48178_8	M8-62_Bin_157_scaffold_2843_23	M8-62_Bin_326_scaffold_53543_2					M3-22_Bin_282_scaffold_128021_2				Meg22_46_Bin_210_scaffold_13377_7,Meg22_46_Bin_210_scaffold_155608_4,Meg22_46_Bin_210_scaffold_55718_4	Meg22_1012_Bin_348_scaffold_33240_7	Meg22_1214_Bin_176_scaffold_35885_5	Meg22_1214_Bin_137_scaffold_61637_5	Meg22_46_Bin_89_scaffold_3387_5,Meg22_46_Bin_89_scaffold_3387_6	Meg22_24_Bin_129_scaffold_27723_5,Meg22_24_Bin_129_scaffold_953_15	BHB10-38_Bin_186_scaffold_184625_4,BHB10-38_Bin_186_scaffold_361680_1	BHB10-38_Bin_9_scaffold_70462_3	M3-30_Bin_374_scaffold_214_42	SY70-4-3_Bin_44_scaffold_48716_3	SY70-4-3_Bin_59_scaffold_13099_2			Meg19_46_Bin_228_scaffold_13291_7	Meg22_46_Bin_45_scaffold_56621_1
	Alcohol dehydrogenase	ADH1_7	K13951	alcohol dehydrogenase 1/7 [EC:1.1.1.1]
		ADH4	K13980	alcohol dehydrogenase 4 [EC:1.1.1.1]
		ADH6	K13952	alcohol dehydrogenase 6 [EC:1.1.1.1]
		adhP	K13953	alcohol dehydrogenase, propanol-preferring [EC:1.1.1.1]	Meg22_810_Bin_217_scaffold_108885_3	Meg19_1012_Bin_198_scaffold_1620_41	GCA_002127415_scaffold_53_5				Meg22_46_Bin_23_scaffold_136107_3	Meg19_1012_Bin_459_scaffold_6041_12,Meg19_1012_Bin_459_scaffold_8145_5	M3-44_Bin_198_scaffold_278622_2	M8-62_Bin_262_scaffold_196598_4		GCA_005223185_scaffold_11_22,GCA_005223185_scaffold_4_123		Meg19_1012_Bin_119_scaffold_7505_9		Meg22_02_Bin_84_scaffold_115300_1	Meg19_46_Bin_60_scaffold_18321_9	Meg22_24_Bin_124_scaffold_7906_5	Meg22_46_Bin_213_scaffold_4034_2		M8-62_Bin_157_scaffold_277033_3		SY70-4-11_Bin_40_scaffold_34475_2			M3-10_Bin_262_scaffold_358925_2	M3-22_Bin_282_scaffold_253603_2	M3-44_Bin_119_scaffold_1127_3	GCA_003820615_scaffold_60_3	LQ108M_Bin_12_scaffold_359_44		Meg22_1012_Bin_348_scaffold_64573_2	Meg22_1214_Bin_176_scaffold_12039_11	Meg22_1214_Bin_137_scaffold_18277_15	Meg22_46_Bin_89_scaffold_16327_3	Meg22_24_Bin_129_scaffold_5615_11	BHB10-38_Bin_186_scaffold_173714_3	BHB10-38_Bin_9_scaffold_4739_2	M3-30_Bin_374_scaffold_924_11				ex4484_8_scaffold_1634_11,ex4484_8_scaffold_67_3	Meg19_46_Bin_228_scaffold_57124_3	Meg22_46_Bin_45_scaffold_19877_1
		yiaY	K13954	alcohol dehydrogenase [EC:1.1.1.1]									M3-44_Bin_198_scaffold_34801_5	M8-62_Bin_262_scaffold_270830_4
		E1.1.1.1, adh	K00001	alcohol dehydrogenase [EC:1.1.1.1]						Meg22_1416_Bin_86_scaffold_42089_6													Meg22_46_Bin_213_scaffold_118906_3		M8-62_Bin_157_scaffold_382494_3		SY70-4-11_Bin_40_scaffold_39737_1	AB_03_Bin_160_scaffold_17533_7
		frmA, ADH5, adhC	K00121	S-(hydroxymethyl)glutathione dehydrogenase / alcohol dehydrogenase [EC:1.1.1.284 1.1.1.1]			GCA_002127415_scaffold_199_14												Meg19_46_Bin_239_scaffold_16982_2							M8-62_Bin_326_scaffold_472971_1		AB_03_Bin_160_scaffold_8462_3													BHB10-38_Bin_186_scaffold_307787_2
		adhE	K04072	acetaldehyde dehydrogenase / alcohol dehydrogenase [EC:1.2.1.10 1.1.1.1]														Meg19_1012_Bin_119_scaffold_6657_9	Meg19_46_Bin_239_scaffold_36689_2		Meg19_46_Bin_60_scaffold_156867_3	Meg22_24_Bin_124_scaffold_108451_2	Meg22_46_Bin_213_scaffold_110728_2,Meg22_46_Bin_213_scaffold_33117_3						BHB10-2_Bin_362_scaffold_230411_2					LQ108M_Bin_12_scaffold_359_2
		ADH1	K18857	alcohol dehydrogenase class-P [EC:1.1.1.1]
		AKR1A1, adh	K00002	alcohol dehydrogenase (NADP+) [EC:1.1.1.2]
		ahr	K12957	alcohol/geraniol dehydrogenase (NADP+) [EC:1.1.1.2 1.1.1.183]
		yahK	K13979	alcohol dehydrogenase (NADP+) [EC:1.1.1.2]
		mdh1, mxaF	K14028	methanol dehydrogenase (cytochrome c) subunit 1 [EC:1.1.2.7]
		mdh2, mxaI	K14029	methanol dehydrogenase (cytochrome c) subunit 2 [EC:1.1.2.7]
		exaA	K00114	alcohol dehydrogenase (cytochrome c) [EC:1.1.2.8]
		eutG	K04022	alcohol dehydrogenase
		adhA	K22473	alcohol dehydrogenase (quinone), dehydrogenase subunit [EC:1.1.5.5]
		adhB	K22474	alcohol dehydrogenase (quinone), cytochrome c subunit [EC:1.1.5.5]																												M3-44_Bin_119_scaffold_12560_1
	Formate dehydrogenase	FDH	K00122	formate dehydrogenase [EC:1.17.1.9]
		fdoG, fdhF, fdwA	K00123	formate dehydrogenase major subunit [EC:1.17.1.9]									M3-44_Bin_198_scaffold_218881_4	M8-62_Bin_262_scaffold_279201_1,M8-62_Bin_262_scaffold_375603_1						Meg22_02_Bin_84_scaffold_106395_4					M8-62_Bin_157_scaffold_33497_11					M3-10_Bin_262_scaffold_127738_2,M3-10_Bin_262_scaffold_147408_1	M3-22_Bin_282_scaffold_27356_3				Meg22_46_Bin_210_scaffold_181683_3												ex4484_8_scaffold_1111_15	Meg19_46_Bin_228_scaffold_35371_5
		fdwB	K22515	formate dehydrogenase beta subunit [EC:1.17.1.9]
		fdoH, fdsB	K00124	formate dehydrogenase iron-sulfur subunit	Meg22_810_Bin_217_scaffold_118114_2	Meg19_1012_Bin_198_scaffold_8275_21		Ga0186947_scaffold_1125_1,Ga0186947_scaffold_1008_5	Ga0170695_scaffold_1060_7		Meg22_46_Bin_23_scaffold_65404_2	Meg19_1012_Bin_459_scaffold_16194_3,Meg19_1012_Bin_459_scaffold_284_120			GCA_003599535_scaffold_13_34,GCA_003599535_scaffold_8_5	GCA_005223185_scaffold_11_13	Meg22_46_Bin_11_scaffold_242413_2,Meg22_46_Bin_11_scaffold_82652_4	Meg19_1012_Bin_119_scaffold_11457_8,Meg19_1012_Bin_119_scaffold_24519_5,Meg19_1012_Bin_119_scaffold_90936_5		Meg22_02_Bin_84_scaffold_367602_2		Meg22_24_Bin_124_scaffold_224078_2,Meg22_24_Bin_124_scaffold_6215_11	Meg22_46_Bin_213_scaffold_52956_3,Meg22_46_Bin_213_scaffold_6620_3,Meg22_46_Bin_213_scaffold_98470_3		M8-62_Bin_157_scaffold_22849_2	M8-62_Bin_326_scaffold_64560_3			BHB10-2_Bin_362_scaffold_155536_1,BHB10-2_Bin_362_scaffold_47263_12	M3-10_Bin_262_scaffold_107754_2,M3-10_Bin_262_scaffold_300377_2,M3-10_Bin_262_scaffold_38714_3	M3-22_Bin_282_scaffold_12133_2,M3-22_Bin_282_scaffold_23327_7,M3-22_Bin_282_scaffold_24201_7,M3-22_Bin_282_scaffold_7533_3	M3-44_Bin_119_scaffold_1541_26,M3-44_Bin_119_scaffold_12729_7,M3-44_Bin_119_scaffold_978_56	GCA_003820615_scaffold_316_2	LQ108M_Bin_12_scaffold_245_80	Meg22_46_Bin_210_scaffold_181683_2
		fdoI, fdsG	K00127	formate dehydrogenase subunit gamma				Ga0186947_scaffold_1003_66	Ga0170695_scaffold_1007_16				M3-44_Bin_198_scaffold_399170_1	M8-62_Bin_262_scaffold_190254_1	GCA_003599535_scaffold_15_1,GCA_003599535_scaffold_2_55,GCA_003599535_scaffold_2_57		Meg22_46_Bin_11_scaffold_264280_1	Meg19_1012_Bin_119_scaffold_12288_1		Meg22_02_Bin_84_scaffold_93342_1	Meg19_46_Bin_60_scaffold_78560_2,Meg19_46_Bin_60_scaffold_78560_3	Meg22_24_Bin_124_scaffold_161986_2,Meg22_24_Bin_124_scaffold_92389_1	Meg22_46_Bin_213_scaffold_209594_1,Meg22_46_Bin_213_scaffold_318400_5	M3-38_Bin_215_scaffold_24206_4	M8-62_Bin_157_scaffold_38344_5,M8-62_Bin_157_scaffold_38344_6	M8-62_Bin_326_scaffold_448536_2		AB_03_Bin_160_scaffold_12696_3,AB_03_Bin_160_scaffold_24652_3	BHB10-2_Bin_362_scaffold_233192_2	M3-10_Bin_262_scaffold_184407_2,M3-10_Bin_262_scaffold_235734_2,M3-10_Bin_262_scaffold_271267_1	M3-22_Bin_282_scaffold_103990_4,M3-22_Bin_282_scaffold_129188_3,M3-22_Bin_282_scaffold_249038_4	M3-44_Bin_119_scaffold_7260_7,M3-44_Bin_119_scaffold_7691_10	GCA_003820615_scaffold_27_3	LQ108M_Bin_12_scaffold_12_538,LQ108M_Bin_12_scaffold_676_88						Meg22_24_Bin_129_scaffold_1760_17			M3-30_Bin_374_scaffold_312123_1
[truncated: 1,054 more rows]
[truncated: 16 more columns]

## Sheet: ST8
						AABM5-125-24												GB-CP11											GB-CP12							GB-CP13											GB-CP14
[truncated: 1,750 more rows]
[truncated: 17 more columns]

[truncated: 7 more sheets: ST9, ST10, ST11, ST12, ST13, ST14, ST15]
